# Supplementary material for: Bactabolize: A tool for high-throughput generation of bacterial strain-specific metabolic models
Source: bioRxiv preprint, doi:10.1101/2023.02.26.530115, version 2 (2023-06-29)
Supplement: Data S1 [file 530115_file17.xlsx]

## Sheet: Legend
Table	Data type	Source
1.Model+BIOLOG_data	Model FBA substrate growth results along with corresponding BIOLOG results of K. pneumoniae KPPR1 used for analysis. Excludes substrates absent in all models	This study; BIOLOG results from: Henry, C.S., et al., Generation and Validation of the iKp1289 Metabolic Model for Klebsiella pneumoniae KPPR1. The Journal of Infectious Diseases, 2017. 215(suppl_1): p. S37-S43.
2.BIOLOG_growth_data_KPPR1	All BIOLOG results of K. pneumoniae KPPR1	This study; BIOLOG results from: Henry, C.S., et al., Generation and Validation of the iKp1289 Metabolic Model for Klebsiella pneumoniae KPPR1. The Journal of Infectious Diseases, 2017. 215(suppl_1): p. S37-S43.
3.BIOLOG_substrates	Reference table showing BIOLOG substrates and their corresponding BiGG and SEED ID information	This study
4.SEED_BiGG_IDs	SEED and BiGG dictionary	This study; ModelSEED; BiGG
1.Model+BIOLOG_data columns	Description
Plate	BIOLOG plate ID
Source	Element source
Chemical	Specific chemical name
BiGG_ID	Identifier for chemical (BiGG)
SEED_ID	Identifier for chemical (SEED)
exchange	Exchange identifer (BiGG)
SEED_exchange	Exchange identifer (SEED)
KPPR1_BIOLOG_growth	Binary growth from BIOLOG results. 1 = growth and 0 = no growth
fba_type	If growth was simulated via FBA or not. potential_element_sources = growth simulated. NA = reaction missing from model
spec_name	Growth media
atmosphere	Atmosphere type. Aerobic or anerobic
Bactabolize_KpSC_pan_binary_growth_prediction	Prediction of growth of model built using Bactabolize and the KpSC pan model, via FBA. 1 = growth and 0 = no growth
CarveMe_universal_binary_growth_prediction	Prediction of growth of model built using CarveMe and the universal model, via FBA. 1 = growth and 0 = no growth
CarveMe_KpSC_pan_binary_growth_prediction	Prediction of growth of model built using CarveMe and the KpSC pan model, via FBA. 1 = growth and 0 = no growth
iKp1289_binary_growth_prediction	Prediction of growth of manually-constructed model iKp1289, via FBA. 1 = growth and 0 = no growth

## Sheet: 1.Model+BIOLOG_data
Plate	Source	Chemical	BiGG_ID	SEED_ID	exchange	SEED_exchange	KPPR1_BIOLOG_growth	fba_type	spec_name	atmosphere	Bactabolize_KpSC_pan_binary_growth_prediction	CarveMe_universal_binary_growth_prediction	CarveMe_KpSC_pan_binary_growth_prediction	iKp1289_binary_growth_prediction	gapseq_binary_growth_prediction	KBase_binary_growth_prediction
PM1	Carbon	L-Arabinose	arab__L	cpd00224	EX_arab__L_e	EX_cpd00224_e	1	potential_element_sources	M9	aerobic	1	1	NA	NA	1	NA
PM1	Carbon	N-Acetyl-D-Glucosamine	acgam	cpd00122	EX_acgam_e	EX_cpd00122_e	1	potential_element_sources	M9	aerobic	1	1	NA	1	1	NA
PM1	Carbon	D-Saccharic acid	glcr	cpd00571	EX_glcr_e	EX_cpd00571_e	1	potential_element_sources	M9	aerobic	1	1	NA	1	1	NA
PM1	Carbon	Succinic acid	succ	cpd00036	EX_succ_e	EX_cpd00036_e	1	potential_element_sources	M9	aerobic	1	1	1	1	1	NA
PM1	Carbon	D-Galactose	gal	cpd00108	EX_gal_e	EX_cpd00108_e	1	potential_element_sources	M9	aerobic	1	1	NA	1	1	NA
PM1	Carbon	L-Aspartic acid	asp__L	cpd00041	EX_asp__L_e	EX_cpd00041_e	1	potential_element_sources	M9	aerobic	1	1	1	NA	1	0
PM1	Carbon	L-Proline	pro__L	cpd00129	EX_pro__L_e	EX_cpd00129_e	1	potential_element_sources	M9	aerobic	1	1	1	NA	1	0
PM1	Carbon	D-Alanine	ala__D	cpd00117	EX_ala__D_e	EX_cpd00117_e	1	potential_element_sources	M9	aerobic	1	1	1	NA	1	NA
PM1	Carbon	D-Trehalose	tre	cpd00794	EX_tre_e	EX_cpd00794_e	1	potential_element_sources	M9	aerobic	1	1	NA	1	1	NA
PM1	Carbon	D-Mannose	man	cpd00138	EX_man_e	EX_cpd00138_e	1	potential_element_sources	M9	aerobic	1	1	NA	1	1	NA
PM1	Carbon	Dulcitol	galt	cpd01171	EX_galt_e	EX_cpd01171_e	0	potential_element_sources	M9	aerobic	0	1	NA	1	NA	NA
PM1	Carbon	D-Serine	ser__D	cpd00550	EX_ser__D_e	EX_cpd00550_e	1	potential_element_sources	M9	aerobic	1	1	NA	NA	1	NA
PM1	Carbon	D-Sorbitol	sbt__D	cpd00588	EX_sbt__D_e	EX_cpd00588_e	1	potential_element_sources	M9	aerobic	1	1	NA	NA	1	NA
PM1	Carbon	Glycerol	glyc	cpd00100	EX_glyc_e	EX_cpd00100_e	1	potential_element_sources	M9	aerobic	1	1	1	1	1	NA
PM1	Carbon	L-Fucose	fuc__L	cpd00751	EX_fuc__L_e	EX_cpd00751_e	1	potential_element_sources	M9	aerobic	1	1	NA	NA	1	NA
PM1	Carbon	D-Glucuronic acid	glcur	cpd00164	EX_glcur_e	EX_cpd00164_e	1	potential_element_sources	M9	aerobic	1	1	NA	1	1	NA
PM1	Carbon	D-Gluconic acid	glcn	cpd00222	EX_glcn_e	EX_cpd00222_e	1	potential_element_sources	M9	aerobic	1	1	1	1	1	NA
PM1	Carbon	D,L-a-Glycerol Phosphate	glyc1p	cpd16494	EX_glyc1p_e	EX_cpd16494_e	1	NA	NA	NA	NA	NA	NA	NA	NA	NA
PM1	Carbon	D-Xylose	xyl__D	cpd00154	EX_xyl__D_e	EX_cpd00154_e	1	potential_element_sources	M9	aerobic	1	1	NA	NA	1	NA
PM1	Carbon	L-Lactic acid	lac__L	cpd00159	EX_lac__L_e	EX_cpd00159_e	1	potential_element_sources	M9	aerobic	1	1	NA	NA	1	NA
PM1	Carbon	Formic acid	for	cpd00047	EX_for_e	EX_cpd00047_e	1	potential_element_sources	M9	aerobic	1	1	1	1	1	0
PM1	Carbon	D-Mannitol	mnl	cpd00314	EX_mnl_e	EX_cpd00314_e	1	potential_element_sources	M9	aerobic	1	1	NA	1	1	NA
PM1	Carbon	L-Glutamic acid	glu__L	cpd00023	EX_glu__L_e	EX_cpd00023_e	1	potential_element_sources	M9	aerobic	1	1	1	NA	1	0
PM1	Carbon	D-Glucose-6-Phosphate	g6p	cpd00079	EX_g6p_e	EX_cpd00079_e	1	potential_element_sources	M9	aerobic	1	1	NA	1	NA	0
PM1	Carbon	D-Galactonic acid-g-Lactone	gullac	cpd00765	EX_gullac_e	EX_cpd00765_e	0	NA	NA	NA	NA	NA	NA	NA	NA	NA
PM1	Carbon	D,L-Malic acid	mal__L	cpd00130	EX_mal__L_e	EX_cpd00130_e	1	potential_element_sources	M9	aerobic	1	1	NA	NA	1	NA
PM1	Carbon	D-Ribose	rib__D	cpd00105	EX_rib__D_e	EX_cpd00105_e	1	potential_element_sources	M9	aerobic	1	1	NA	NA	1	NA
PM1	Carbon	L-Rhamnose	rmn	cpd00396	EX_rmn_e	EX_cpd00396_e	1	potential_element_sources	M9	aerobic	1	1	NA	1	1	NA
PM1	Carbon	D-Fructose	fru	cpd00082	EX_fru_e	EX_cpd00082_e	1	potential_element_sources	M9	aerobic	1	1	NA	1	1	NA
PM1	Carbon	Acetic acid	ac	cpd00029	EX_ac_e	EX_cpd00029_e	1	potential_element_sources	M9	aerobic	1	1	1	1	1	0
PM1	Carbon	a-D-Glucose	glc__aD	NA	EX_glc__aD_e	NA	1	potential_element_sources	M9	aerobic	NA	1	NA	NA	NA	NA
PM1	Carbon	Maltose	malt	cpd00179	EX_malt_e	EX_cpd00179_e	1	potential_element_sources	M9	aerobic	1	1	NA	1	1	NA
PM1	Carbon	D-Melibiose	melib	cpd03198	EX_melib_e	EX_cpd03198_e	1	potential_element_sources	M9	aerobic	1	1	NA	1	1	NA
PM1	Carbon	Thymidine	thymd	cpd00184	EX_thymd_e	EX_cpd00184_e	1	potential_element_sources	M9	aerobic	1	1	NA	1	1	NA
PM1	Carbon	L-Asparagine	asn__L	cpd00132	EX_asn__L_e	EX_cpd00132_e	1	potential_element_sources	M9	aerobic	1	1	1	NA	1	0
PM1	Carbon	D-Aspartic acid	asp__D	cpd00320	EX_asp__D_e	EX_cpd00320_e	0	potential_element_sources	M9	aerobic	0	NA	NA	NA	NA	NA
PM1	Carbon	1,2-Propanediol	12ppd__S	cpd19024	EX_12ppd__S_e	EX_cpd19024_e	0	potential_element_sources	M9	aerobic	0	1	NA	1	1	NA
PM1	Carbon	a-Ketoglutaric acid	akg	cpd00024	EX_akg_e	EX_cpd00024_e	0	potential_element_sources	M9	aerobic	1	1	1	1	1	0
PM1	Carbon	a-Ketobutyric acid	2obut	cpd00094	EX_2obut_e	EX_cpd00094_e	0	potential_element_sources	M9	aerobic	0	NA	NA	NA	NA	NA
PM1	Carbon	Sucrose	sucr	cpd00076	EX_sucr_e	EX_cpd00076_e	1	potential_element_sources	M9	aerobic	1	1	NA	1	1	NA
PM1	Carbon	Uridine	uri	cpd00249	EX_uri_e	EX_cpd00249_e	1	potential_element_sources	M9	aerobic	1	1	NA	1	1	NA
PM1	Carbon	L-Glutamine	gln__L	cpd00053	EX_gln__L_e	EX_cpd00053_e	1	potential_element_sources	M9	aerobic	1	1	NA	NA	1	0
PM1	Carbon	m-Tartaric acid	tartr__M	cpd00432	EX_tartr__M_e	EX_cpd00432_e	0	NA	NA	NA	NA	NA	NA	NA	NA	NA
PM1	Carbon	D-Glucose-1-Phosphate	g1p	cpd00089	EX_g1p_e	EX_cpd00089_e	1	potential_element_sources	M9	aerobic	1	1	NA	1	NA	NA
PM1	Carbon	D-Fructose-6-Phosphate	f6p	cpd00072Â	EX_f6p_e	EX_cpd00072Â _e	1	potential_element_sources	M9	aerobic	1	1	NA	1	NA	NA
PM1	Carbon	a-Hydroxybutyric acid	2hb	cpd03561	EX_2hb_e	EX_cpd03561_e	0	NA	NA	NA	NA	NA	NA	NA	NA	NA
PM1	Carbon	Adonitol	rbt	cpd00366	EX_rbt_e	EX_cpd00366_e	1	potential_element_sources	M9	aerobic	1	1	NA	NA	1	NA
PM1	Carbon	Maltotriose	malttr	cpd01262	EX_malttr_e	EX_cpd01262_e	1	potential_element_sources	M9	aerobic	1	1	NA	1	1	NA
PM1	Carbon	2`-Deoxyadenosine	dad_2	cpd00438	EX_dad_2_e	EX_cpd00438_e	1	potential_element_sources	M9	aerobic	1	1	NA	NA	NA	NA
PM1	Carbon	Adenosine	adn	cpd00182	EX_adn_e	EX_cpd00182_e	1	potential_element_sources	M9	aerobic	1	1	NA	1	1	NA
PM1	Carbon	Gly-Asp	gly_asp__L	cpd11589	EX_gly_asp__L_e	EX_cpd11589_e	1	potential_element_sources	M9	aerobic	NA	1	NA	NA	NA	NA
PM1	Carbon	Citric acid	cit	cpd00137	EX_cit_e	EX_cpd00137_e	1	potential_element_sources	M9	aerobic	1	1	NA	1	1	NA
PM1	Carbon	m-Inositol	inost	cpd00121	EX_inost_e	EX_cpd00121_e	1	potential_element_sources	M9	aerobic	1	1	NA	1	1	NA
PM1	Carbon	Fumaric acid	fum	cpd00106	EX_fum_e	EX_cpd00106_e	1	potential_element_sources	M9	aerobic	1	1	1	1	1	NA
PM1	Carbon	Propionic acid	ppa	cpd00141	EX_ppa_e	EX_cpd00141_e	0	potential_element_sources	M9	aerobic	0	1	NA	1	1	NA
PM1	Carbon	Mucic acid	galct__D	cpd00652	EX_galct__D_e	EX_cpd00652_e	1	potential_element_sources	M9	aerobic	1	1	NA	NA	NA	NA
PM1	Carbon	Glycolic acid	glyclt	cpd00139	EX_glyclt_e	EX_cpd00139_e	0	potential_element_sources	M9	aerobic	0	1	0	1	1	NA
PM1	Carbon	Glyoxylic acid	glx	cpd00040	EX_glx_e	EX_cpd00040_e	0	potential_element_sources	M9	aerobic	0	NA	NA	NA	NA	NA
PM1	Carbon	D-Cellobiose	cellb	cpd00158	EX_cellb_e	EX_cpd00158_e	1	potential_element_sources	M9	aerobic	1	1	NA	1	1	0
PM1	Carbon	Inosine	ins	cpd00246	EX_ins_e	EX_cpd00246_e	1	potential_element_sources	M9	aerobic	1	1	NA	1	1	NA
PM1	Carbon	Gly-Glu	gly_glu__L	cpd24418Â	EX_gly_glu__L_e	EX_cpd24418Â _e	1	potential_element_sources	M9	aerobic	NA	1	NA	NA	NA	NA
PM1	Carbon	Tricarballylic acid	tcb	cpd16654	EX_tcb_e	EX_cpd16654_e	0	potential_element_sources	M9	aerobic	0	NA	NA	NA	NA	NA
PM1	Carbon	L-Serine	ser__L	cpd00054	EX_ser__L_e	EX_cpd00054_e	1	potential_element_sources	M9	aerobic	1	1	1	NA	1	0
PM1	Carbon	L-Threonine	thr__L	cpd00161	EX_thr__L_e	EX_cpd00161_e	1	potential_element_sources	M9	aerobic	1	1	1	NA	1	0
PM1	Carbon	L-Alanine	ala__L	cpd00035	EX_ala__L_e	EX_cpd00035_e	1	potential_element_sources	M9	aerobic	1	1	NA	NA	1	0
PM1	Carbon	Ala-Gly	L_alagly	cpd11585	EX_L_alagly_e	EX_cpd11585_e	1	potential_element_sources	M9	aerobic	1	NA	NA	NA	NA	NA
PM1	Carbon	Acetoacetic acid	acac	cpd00142	EX_acac_e	EX_cpd00142_e	0	potential_element_sources	M9	aerobic	0	1	NA	1	NA	NA
PM1	Carbon	N-Acetyl-D-Mannosamine	acmana	cpd00492	EX_acmana_e	EX_cpd00492_e	1	potential_element_sources	M9	aerobic	1	1	NA	1	NA	NA
PM1	Carbon	D-Malic acid	mal__D	cpd00386	EX_mal__D_e	EX_cpd00386_e	0	potential_element_sources	M9	aerobic	1	1	NA	NA	NA	NA
PM1	Carbon	L-Malic acid	mal__L	cpd00130	EX_mal__L_e	EX_cpd00130_e	1	potential_element_sources	M9	aerobic	1	1	NA	NA	1	NA
PM1	Carbon	Gly-Pro	gly_pro__L	cpd11588	EX_gly_pro__L_e	EX_cpd11588_e	1	potential_element_sources	M9	aerobic	1	1	NA	NA	NA	NA
PM1	Carbon	p-Hydroxyphenyl Acetic acid	4hoxpac	cpd00489	EX_4hoxpac_e	EX_cpd00489_e	1	potential_element_sources	M9	aerobic	NA	1	NA	NA	NA	NA
PM1	Carbon	m-Hydroxyphenyl Acetic acid	3hoxpac	cpd03320Â	EX_3hoxpac_e	EX_cpd03320Â _e	1	potential_element_sources	M9	aerobic	NA	1	NA	NA	NA	NA
PM1	Carbon	Tyramine	tym	cpd00374	EX_tym_e	EX_cpd00374_e	1	potential_element_sources	M9	aerobic	1	0	NA	1	NA	NA
PM1	Carbon	L-Lyxose	lyx__L	cpd01067	EX_lyx__L_e	EX_cpd01067_e	1	potential_element_sources	M9	aerobic	1	1	NA	NA	NA	NA
PM1	Carbon	Pyruvic acid	pyr	cpd00020	EX_pyr_e	EX_cpd00020_e	1	potential_element_sources	M9	aerobic	1	1	1	1	1	NA
PM1	Carbon	D-Galacturonic acid	galur	cpd00280	EX_galur_e	EX_cpd00280_e	1	potential_element_sources	M9	aerobic	1	1	NA	1	1	NA
PM1	Carbon	Phenylethylamine	peamn	cpd03161	EX_peamn_e	EX_cpd03161_e	0	potential_element_sources	M9	aerobic	0	1	NA	1	NA	NA
PM1	Carbon	2-Aminoethanol	etha	cpd00162	EX_etha_e	EX_cpd00162_e	0	potential_element_sources	M9	aerobic	1	1	1	1	NA	0
PM2A	Carbon	Chondroitin Sulfate C	cs_c	cpd11717Â	EX_cs_c_e	EX_cpd11717Â _e	0	NA	NA	NA	NA	NA	NA	NA	NA	NA
PM2A	Carbon	Dextrin	dextrin	cpd11594	EX_dextrin_e	EX_cpd11594_e	1	NA	NA	NA	NA	NA	NA	NA	NA	NA
PM2A	Carbon	Glycogen	glycogen	cpd00155	EX_glycogen_e	EX_cpd00155_e	0	NA	NA	NA	NA	NA	NA	NA	NA	NA
PM2A	Carbon	Mannan	mannan	cpd11685	EX_mannan_e	EX_cpd11685_e	0	NA	NA	NA	NA	NA	NA	NA	NA	NA
PM2A	Carbon	Pectin	pectin	cpd11601	EX_pectin_e	EX_cpd11601_e	1	NA	NA	NA	NA	NA	NA	NA	NA	NA
PM2A	Carbon	N-Acetyl-D-Galactosamine	acgal	cpd00832	EX_acgal_e	EX_cpd00832_e	0	potential_element_sources	M9	aerobic	0	0	NA	1	1	NA
PM2A	Carbon	N-Acetyl-Neuraminic acid	acnam	cpd00232	EX_acnam_e	EX_cpd00232_e	0	potential_element_sources	M9	aerobic	0	NA	NA	NA	1	NA
PM2A	Carbon	b-D-Allose	all__D	cpd01055	EX_all__D_e	EX_cpd01055_e	0	potential_element_sources	M9	aerobic	0	1	NA	NA	NA	NA
PM2A	Carbon	D-Arabinose	arab__D	cpd00185	EX_arab__D_e	EX_cpd00185_e	0	NA	NA	NA	NA	NA	NA	NA	1	NA
PM2A	Carbon	D-Arabitol	abt__D	cpd01307	EX_abt__D_e	EX_cpd01307_e	1	potential_element_sources	M9	aerobic	1	1	NA	NA	NA	NA
PM2A	Carbon	L-Arabitol	abt__L	cpd00417	EX_abt__L_e	EX_cpd00417_e	0	NA	NA	NA	NA	NA	NA	NA	NA	NA
PM2A	Carbon	Arbutin	arbt	cpd03696	EX_arbt_e	EX_cpd03696_e	1	potential_element_sources	M9	aerobic	1	1	NA	1	NA	NA
PM2A	Carbon	2-Deoxy-D-Ribose	drib	cpd01242	EX_drib_e	EX_cpd01242_e	0	potential_element_sources	M9	aerobic	NA	1	NA	NA	NA	NA
PM2A	Carbon	a-Methyl-D-Glucoside	amdglc	cpd15584	EX_amdglc_e	EX_cpd15584_e	0	NA	NA	NA	NA	NA	NA	NA	NA	NA
PM2A	Carbon	b-Methyl-D-Galactoside	gal_bD	cpd00709	EX_gal_bD_e	EX_cpd00709_e	1	potential_element_sources	M9	aerobic	1	1	NA	NA	NA	NA
PM2A	Carbon	b-Methyl-D-Glucuronic acid	metglcur	NA	EX_metglcur_e	NA	0	NA	NA	NA	NA	NA	NA	NA	NA	NA
PM2A	Carbon	Palatinose	pala	cpd01200	EX_pala_e	EX_cpd01200_e	1	potential_element_sources	M9	aerobic	1	NA	NA	NA	NA	NA
PM2A	Carbon	D-Raffinose	raffin	cpd00382	EX_raffin_e	EX_cpd00382_e	1	potential_element_sources	M9	aerobic	1	1	NA	NA	1	NA
PM2A	Carbon	Salicin	salcn	cpd01030	EX_salcn_e	EX_cpd01030_e	1	potential_element_sources	M9	aerobic	NA	1	NA	1	1	NA
PM2A	Carbon	L-Sorbose	srb__L	cpd00212	EX_srb__L_e	EX_cpd00212_e	1	potential_element_sources	M9	aerobic	1	NA	NA	NA	NA	NA
PM2A	Carbon	Stachyose	stys	cpd01133	EX_stys_e	EX_cpd01133_e	1	NA	NA	NA	NA	NA	NA	NA	NA	NA
PM2A	Carbon	D-Tagatose	tag__D	cpd00589	EX_tag__D_e	EX_cpd00589_e	0	potential_element_sources	M9	aerobic	0	NA	NA	NA	NA	NA
PM2A	Carbon	Turanose	tur	cpd20885	EX_tur_e	EX_cpd20885_e	0	potential_element_sources	M9	aerobic	1	NA	NA	NA	NA	NA
PM2A	Carbon	Xylitol	xylt	cpd00306	EX_xylt_e	EX_cpd00306_e	0	NA	NA	NA	NA	NA	NA	NA	1	NA
PM2A	Carbon	g-Amino-N-Butyric acid	4abut	cpd00281	EX_4abut_e	EX_cpd00281_e	1	potential_element_sources	M9	aerobic	1	1	NA	1	1	NA
PM2A	Carbon	Butyric acid	but	cpd00211	EX_but_e	EX_cpd00211_e	0	potential_element_sources	M9	aerobic	0	1	NA	1	1	NA
PM2A	Carbon	Capric acid	dca	cpd01107	EX_dca_e	EX_cpd01107_e	0	potential_element_sources	M9	aerobic	0	1	NA	1	1	NA
PM2A	Carbon	Caproic acid	caproic	cpd28989Â	EX_caproic_e	EX_cpd28989Â _e	0	NA	NA	NA	NA	NA	NA	NA	NA	NA
PM2A	Carbon	Citraconic acid	citac	cpd01502	EX_citac_e	EX_cpd01502_e	0	NA	NA	NA	NA	NA	NA	NA	NA	NA
PM2A	Carbon	Citramalic acid	citm	cpd00607	EX_citm_e	EX_cpd00607_e	0	NA	NA	NA	NA	NA	NA	NA	NA	NA
PM2A	Carbon	D-Glucosamine	gam	cpd00276	EX_gam_e	EX_cpd00276_e	1	potential_element_sources	M9	aerobic	1	1	NA	1	1	NA
PM2A	Carbon	2-Hydroxybenzoic acid	salc	cpd00599	EX_salc_e	EX_cpd00599_e	0	potential_element_sources	M9	aerobic	NA	0	NA	NA	NA	NA
PM2A	Carbon	4-Hydroxybenzoic acid	4hbz	cpd00136	EX_4hbz_e	EX_cpd00136_e	0	potential_element_sources	M9	aerobic	NA	1	NA	NA	1	NA
PM2A	Carbon	b-Hydroxybutyric acid	bhb	cpd00797	EX_bhb_e	EX_cpd00797_e	1	potential_element_sources	M9	aerobic	NA	NA	NA	1	NA	NA
PM2A	Carbon	g-Hydroxybutyric acid	ghb	cpd00728	EX_ghb_e	EX_cpd00728_e	0	NA	NA	NA	NA	NA	NA	NA	NA	NA
PM2A	Carbon	Itaconic acid	itacon	cpd00380	EX_itacon_e	EX_cpd00380_e	0	NA	NA	NA	NA	NA	NA	NA	1	NA
PM2A	Carbon	5-Keto-D-Gluconic acid	5dglcn	cpd00781	EX_5dglcn_e	EX_cpd00781_e	0	potential_element_sources	M9	aerobic	0	1	NA	1	NA	NA
PM2A	Carbon	Malonic acid	malon	cpd00308	EX_malon_e	EX_cpd00308_e	1	NA	NA	NA	NA	NA	NA	NA	NA	NA
PM2A	Carbon	Oxalic acid	oxa	cpd00180	EX_oxa_e	EX_cpd00180_e	0	potential_element_sources	M9	aerobic	NA	0	NA	NA	NA	0
PM2A	Carbon	Quinic acid	quin	cpd00248	EX_quin_e	EX_cpd00248_e	1	NA	NA	NA	NA	NA	NA	NA	NA	NA
PM2A	Carbon	Sebacic acid	sebacid	cpd05192Â	EX_sebacid_e	EX_cpd05192Â _e	0	NA	NA	NA	NA	NA	NA	NA	NA	NA
PM2A	Carbon	D-Tartaric acid	tartr__D	cpd19018	EX_tartr__D_e	EX_cpd19018_e	0	potential_element_sources	M9	aerobic	NA	1	NA	NA	NA	NA
PM2A	Carbon	L-Tartaric acid	tartr__L	cpd00666Â	EX_tartr__L_e	EX_cpd00666Â _e	1	potential_element_sources	M9	aerobic	1	1	NA	NA	NA	NA
PM2A	Carbon	Acetamide	ad	cpd03734	EX_ad_e	EX_cpd03734_e	0	NA	NA	NA	NA	NA	NA	NA	NA	NA
PM2A	Carbon	N-Acetyl-L-Glutamic acid	acglu	cpd00477	EX_acglu_e	EX_cpd00477_e	0	NA	NA	NA	NA	NA	NA	NA	NA	NA
PM2A	Carbon	L-Arginine	arg__L	cpd00051	EX_arg__L_e	EX_cpd00051_e	1	potential_element_sources	M9	aerobic	1	1	1	NA	1	0
PM2A	Carbon	Glycine	gly	cpd00033	EX_gly_e	EX_cpd00033_e	0	potential_element_sources	M9	aerobic	1	1	NA	1	1	0
PM2A	Carbon	L-Histidine	his__L	cpd00119	EX_his__L_e	EX_cpd00119_e	1	potential_element_sources	M9	aerobic	1	1	1	NA	1	0
PM2A	Carbon	L-Homoserine	hom__L	cpd00227	EX_hom__L_e	EX_cpd00227_e	0	potential_element_sources	M9	aerobic	0	0	0	NA	NA	NA
PM2A	Carbon	Hydroxy-L-Proline	4hpro_LT	cpd00851	EX_4hpro_LT_e	EX_cpd00851_e	0	NA	NA	NA	NA	NA	NA	NA	NA	NA
PM2A	Carbon	L-Isoleucine	ile__L	cpd00322	EX_ile__L_e	EX_cpd00322_e	0	potential_element_sources	M9	aerobic	0	0	0	NA	1	0
PM2A	Carbon	L-Leucine	leu__L	cpd00107	EX_leu__L_e	EX_cpd00107_e	0	potential_element_sources	M9	aerobic	0	0	0	NA	1	0
PM2A	Carbon	L-Lysine	lys__L	cpd00039	EX_lys__L_e	EX_cpd00039_e	0	potential_element_sources	M9	aerobic	0	1	0	NA	1	0
PM2A	Carbon	L-Methionine	met__L	cpd00060	EX_met__L_e	EX_cpd00060_e	0	potential_element_sources	M9	aerobic	0	0	NA	NA	1	0
PM2A	Carbon	L-Ornithine	orn	cpd00064Â Â	EX_orn_e	EX_cpd00064Â Â _e	1	potential_element_sources	M9	aerobic	1	1	1	1	1	NA
PM2A	Carbon	L-Phenylalanine	phe__L	cpd00066	EX_phe__L_e	EX_cpd00066_e	0	potential_element_sources	M9	aerobic	1	1	1	NA	1	0
PM2A	Carbon	L-Pyroglutamic acid	5oxpro	cpd01293	EX_5oxpro_e	EX_cpd01293_e	0	NA	NA	NA	NA	NA	NA	NA	NA	NA
PM2A	Carbon	L-Valine	val__L	cpd00156	EX_val__L_e	EX_cpd00156_e	0	potential_element_sources	M9	aerobic	0	0	0	NA	1	0
PM2A	Carbon	D,L-Carnitine	crn	cpd00266	EX_crn_e	EX_cpd00266_e	0	potential_element_sources	M9	aerobic	0	1	NA	1	1	NA
PM2A	Carbon	Putrescine	ptrc	cpd00118	EX_ptrc_e	EX_cpd00118_e	1	potential_element_sources	M9	aerobic	1	1	1	1	1	0
PM2A	Carbon	Dihydroxyacetone	dha	cpd00157	EX_dha_e	EX_cpd00157_e	1	potential_element_sources	M9	aerobic	1	1	1	1	NA	NA
PM2A	Carbon	2,3-Butanediol	btd_RR	cpd01947	EX_btd_RR_e	EX_cpd01947_e	0	potential_element_sources	M9	aerobic	0	NA	NA	NA	NA	NA
PM2A	Carbon	2,3-Butanedione	diact	cpd00551	EX_diact_e	EX_cpd00551_e	0	potential_element_sources	M9	aerobic	0	NA	0	NA	NA	NA
PM2A	Carbon	3-Hydroxy-2-butanone	R_actn	cpd00361	EX_R_actn_e	EX_cpd00361_e	0	NA	NA	NA	NA	NA	NA	NA	NA	NA
PM3B	Nitrogen	Ammonia	nh3	cpd00013	EX_nh3_e	EX_cpd00013_e	1	NA	NA	NA	NA	NA	NA	NA	NA	NA
PM3B	Nitrogen	Nitrite	no2	cpd00075	EX_no2_e	EX_cpd00075_e	0	potential_element_sources	M9	aerobic	0	1	NA	1	1	0
PM3B	Nitrogen	Nitrate	no3	cpd00209	EX_no3_e	EX_cpd00209_e	0	potential_element_sources	M9	aerobic	0	1	NA	1	1	NA
PM3B	Nitrogen	Urea	urea	cpd00073	EX_urea_e	EX_cpd00073_e	0	potential_element_sources	M9	aerobic	1	1	1	1	1	0
PM3B	Nitrogen	L-Alanine	ala__L	cpd00035	EX_ala__L_e	EX_cpd00035_e	1	potential_element_sources	M9	aerobic	1	1	NA	NA	1	0
PM3B	Nitrogen	L-Arginine	arg__L	cpd00051	EX_arg__L_e	EX_cpd00051_e	1	potential_element_sources	M9	aerobic	1	1	1	NA	1	0
PM3B	Nitrogen	L-Asparagine	asn__L	cpd00132	EX_asn__L_e	EX_cpd00132_e	1	potential_element_sources	M9	aerobic	1	1	1	NA	1	0
PM3B	Nitrogen	L-Aspartic acid	asp__L	cpd00041	EX_asp__L_e	EX_cpd00041_e	1	potential_element_sources	M9	aerobic	1	1	1	NA	1	0
PM3B	Nitrogen	L-Cysteine	cys__L	cpd00084	EX_cys__L_e	EX_cpd00084_e	1	potential_element_sources	M9	aerobic	0	1	0	NA	1	0
PM3B	Nitrogen	L-Glutamic acid	glu__L	cpd00023	EX_glu__L_e	EX_cpd00023_e	1	potential_element_sources	M9	aerobic	1	1	1	NA	1	0
PM3B	Nitrogen	L-Glutamine	gln__L	cpd00053	EX_gln__L_e	EX_cpd00053_e	1	potential_element_sources	M9	aerobic	1	1	NA	NA	1	0
PM3B	Nitrogen	Glycine	gly	cpd00033	EX_gly_e	EX_cpd00033_e	1	potential_element_sources	M9	aerobic	1	1	NA	1	1	0
PM3B	Nitrogen	L-Histidine	his__L	cpd00119	EX_his__L_e	EX_cpd00119_e	1	potential_element_sources	M9	aerobic	1	1	1	NA	1	0
PM3B	Nitrogen	L-Isoleucine	ile__L	cpd00322	EX_ile__L_e	EX_cpd00322_e	0	potential_element_sources	M9	aerobic	0	0	0	NA	1	0
PM3B	Nitrogen	L-Leucine	leu__L	cpd00107	EX_leu__L_e	EX_cpd00107_e	0	potential_element_sources	M9	aerobic	0	0	0	NA	1	0
PM3B	Nitrogen	L-Lysine	lys__L	cpd00039	EX_lys__L_e	EX_cpd00039_e	1	potential_element_sources	M9	aerobic	0	1	0	NA	1	0
PM3B	Nitrogen	L-Methionine	met__L	cpd00060	EX_met__L_e	EX_cpd00060_e	0	potential_element_sources	M9	aerobic	0	0	NA	NA	1	0
PM3B	Nitrogen	L-Phenylalanine	phe__L	cpd00066	EX_phe__L_e	EX_cpd00066_e	1	potential_element_sources	M9	aerobic	1	1	1	NA	1	0
PM3B	Nitrogen	L-Proline	pro__L	cpd00129	EX_pro__L_e	EX_cpd00129_e	1	potential_element_sources	M9	aerobic	1	1	1	NA	1	0
PM3B	Nitrogen	L-Serine	ser__L	cpd00054	EX_ser__L_e	EX_cpd00054_e	1	potential_element_sources	M9	aerobic	1	1	1	NA	1	0
PM3B	Nitrogen	L-Threonine	thr__L	cpd00161	EX_thr__L_e	EX_cpd00161_e	1	potential_element_sources	M9	aerobic	1	1	1	NA	1	0
PM3B	Nitrogen	L-Tryptophan	trp__L	cpd00065	EX_trp__L_e	EX_cpd00065_e	0	potential_element_sources	M9	aerobic	0	1	0	NA	1	0
PM3B	Nitrogen	L-Tyrosine	tyr__L	cpd00069	EX_tyr__L_e	EX_cpd00069_e	1	potential_element_sources	M9	aerobic	0	1	0	NA	1	0
PM3B	Nitrogen	L-Valine	val__L	cpd00156	EX_val__L_e	EX_cpd00156_e	0	potential_element_sources	M9	aerobic	0	0	0	NA	1	0
PM3B	Nitrogen	D-Alanine	ala__D	cpd00117	EX_ala__D_e	EX_cpd00117_e	1	potential_element_sources	M9	aerobic	1	1	1	NA	1	NA
PM3B	Nitrogen	D-Asparagine	asn__D	cpd01308Â	EX_asn__D_e	EX_cpd01308Â _e	0	NA	NA	NA	NA	NA	NA	NA	NA	NA
PM3B	Nitrogen	D-Aspartic acid	asp__D	cpd00320	EX_asp__D_e	EX_cpd00320_e	0	potential_element_sources	M9	aerobic	0	NA	NA	NA	NA	NA
PM3B	Nitrogen	D-Glutamic acid	glu__D	cpd00186	EX_glu__D_e	EX_cpd00186_e	1	NA	NA	NA	NA	NA	NA	NA	NA	NA
PM3B	Nitrogen	D-Lysine	lys__D	cpd00549	EX_lys__D_e	EX_cpd00549_e	0	potential_element_sources	M9	aerobic	NA	1	NA	NA	NA	NA
PM3B	Nitrogen	D-Serine	ser__D	cpd00550	EX_ser__D_e	EX_cpd00550_e	1	potential_element_sources	M9	aerobic	1	1	NA	NA	1	NA
PM3B	Nitrogen	D-Valine	val__D	cpd03840	EX_val__D_e	EX_cpd03840_e	0	potential_element_sources	M9	aerobic	NA	0	NA	NA	NA	NA
PM3B	Nitrogen	L-Citrulline	citr__L	cpd00274	EX_citr__L_e	EX_cpd00274_e	0	NA	NA	NA	NA	NA	NA	NA	NA	NA
PM3B	Nitrogen	L-Homoserine	hom__L	cpd00227	EX_hom__L_e	EX_cpd00227_e	0	potential_element_sources	M9	aerobic	0	0	0	NA	NA	NA
PM3B	Nitrogen	L-Ornithine	orn	cpd00064Â Â	EX_orn_e	EX_cpd00064Â Â _e	1	potential_element_sources	M9	aerobic	1	1	1	1	1	NA
PM3B	Nitrogen	N-Acetyl-L-Glutamic acid	acglu	cpd00477	EX_acglu_e	EX_cpd00477_e	0	NA	NA	NA	NA	NA	NA	NA	NA	NA
PM3B	Nitrogen	L-Pyroglutamic acid	5oxpro	cpd01293	EX_5oxpro_e	EX_cpd01293_e	0	NA	NA	NA	NA	NA	NA	NA	NA	NA
PM3B	Nitrogen	Hydroxylamine	ham	cpd00165	EX_ham_e	EX_cpd00165_e	0	NA	NA	NA	NA	NA	NA	NA	NA	NA
PM3B	Nitrogen	Methylamine	mma	cpd00187	EX_mma_e	EX_cpd00187_e	0	NA	NA	NA	NA	NA	NA	NA	NA	NA
PM3B	Nitrogen	Ethanolamine	etha	cpd00162	EX_etha_e	EX_cpd00162_e	0	potential_element_sources	M9	aerobic	1	1	1	1	NA	0
PM3B	Nitrogen	Putrescine	ptrc	cpd00118	EX_ptrc_e	EX_cpd00118_e	1	potential_element_sources	M9	aerobic	1	1	1	1	1	0
PM3B	Nitrogen	Agmatine	agm	cpd00152	EX_agm_e	EX_cpd00152_e	1	potential_element_sources	M9	aerobic	1	1	1	1	1	NA
PM3B	Nitrogen	Histamine	hista	cpd00312	EX_hista_e	EX_cpd00312_e	0	NA	NA	NA	NA	NA	NA	NA	NA	NA
PM3B	Nitrogen	b-Phenylethylamine	peamn	cpd03161	EX_peamn_e	EX_cpd03161_e	0	potential_element_sources	M9	aerobic	0	1	NA	1	NA	NA
PM3B	Nitrogen	Tyramine	tym	cpd00374	EX_tym_e	EX_cpd00374_e	1	potential_element_sources	M9	aerobic	1	1	NA	1	NA	NA
PM3B	Nitrogen	Acetamide	ad	cpd03734	EX_ad_e	EX_cpd03734_e	0	NA	NA	NA	NA	NA	NA	NA	NA	NA
PM3B	Nitrogen	Formamide	frmd	cpd00378	EX_frmd_e	EX_cpd00378_e	0	NA	NA	NA	NA	NA	NA	NA	NA	NA
PM3B	Nitrogen	D-Glucosamine	gam	cpd00276	EX_gam_e	EX_cpd00276_e	1	potential_element_sources	M9	aerobic	1	1	NA	1	1	NA
PM3B	Nitrogen	D-Galactosamine	galam	NA	EX_galam_e	NA	1	NA	NA	NA	NA	NA	NA	NA	NA	NA
PM3B	Nitrogen	N-Acetyl-D-Glucosamine	acgam	cpd00122	EX_acgam_e	EX_cpd00122_e	1	potential_element_sources	M9	aerobic	1	1	NA	1	1	NA
PM3B	Nitrogen	N-Acetyl-D-Galactosamine	acgal	cpd00832	EX_acgal_e	EX_cpd00832_e	0	potential_element_sources	M9	aerobic	0	0	NA	0	1	NA
PM3B	Nitrogen	N-Acetyl-D-Mannosamine	acmana	cpd00492	EX_acmana_e	EX_cpd00492_e	1	potential_element_sources	M9	aerobic	1	1	NA	1	NA	NA
PM3B	Nitrogen	Adenine	ade	cpd00128	EX_ade_e	EX_cpd00128_e	0	potential_element_sources	M9	aerobic	1	1	1	1	NA	NA
PM3B	Nitrogen	Adenosine	adn	cpd00182	EX_adn_e	EX_cpd00182_e	1	potential_element_sources	M9	aerobic	1	1	NA	1	1	NA
PM3B	Nitrogen	Cytidine	cytd	cpd00367	EX_cytd_e	EX_cpd00367_e	1	potential_element_sources	M9	aerobic	1	1	NA	NA	1	NA
PM3B	Nitrogen	Cytosine	csn	cpd00307	EX_csn_e	EX_cpd00307_e	0	potential_element_sources	M9	aerobic	1	1	NA	1	1	NA
PM3B	Nitrogen	Guanine	gua	cpd00207	EX_gua_e	EX_cpd00207_e	0	potential_element_sources	M9	aerobic	1	1	1	1	NA	NA
PM3B	Nitrogen	Guanosine	gsn	cpd00311	EX_gsn_e	EX_cpd00311_e	1	potential_element_sources	M9	aerobic	1	1	NA	1	1	NA
PM3B	Nitrogen	Thymine	thym	cpd00151	EX_thym_e	EX_cpd00151_e	0	potential_element_sources	M9	aerobic	0	0	0	1	NA	NA
PM3B	Nitrogen	Thymidine	thymd	cpd00184	EX_thymd_e	EX_cpd00184_e	1	potential_element_sources	M9	aerobic	0	0	NA	1	1	NA
PM3B	Nitrogen	Uracil	ura	cpd00092	EX_ura_e	EX_cpd00092_e	0	potential_element_sources	M9	aerobic	0	1	0	1	1	NA
PM3B	Nitrogen	Uridine	uri	cpd00249	EX_uri_e	EX_cpd00249_e	1	potential_element_sources	M9	aerobic	0	1	NA	1	1	NA
PM3B	Nitrogen	Inosine	ins	cpd00246	EX_ins_e	EX_cpd00246_e	1	potential_element_sources	M9	aerobic	1	1	NA	1	1	NA
PM3B	Nitrogen	Xanthine	xan	cpd00309	EX_xan_e	EX_cpd00309_e	1	potential_element_sources	M9	aerobic	1	1	NA	1	1	NA
PM3B	Nitrogen	Xanthosine	xtsn	cpd01217	EX_xtsn_e	EX_cpd01217_e	0	potential_element_sources	M9	aerobic	0	1	NA	0	1	NA
PM3B	Nitrogen	Uric acid	urate	cpd00300	EX_urate_e	EX_cpd00300_e	0	NA	NA	NA	NA	NA	NA	NA	NA	NA
PM3B	Nitrogen	Alloxan	CE0074	cpd24434	EX_CE0074_e	EX_cpd24434_e	1	NA	NA	NA	NA	NA	NA	NA	NA	NA
PM3B	Nitrogen	Allantoin	alltn	cpd01092	EX_alltn_e	EX_cpd01092_e	0	potential_element_sources	M9	aerobic	NA	1	NA	NA	1	NA
PM3B	Nitrogen	g-Amino-N-Butyric acid	4abut	cpd00281	EX_4abut_e	EX_cpd00281_e	1	potential_element_sources	M9	aerobic	1	1	NA	1	1	NA
PM3B	Nitrogen	e-Amino-N-Caproic acid	6ax	cpd01588	EX_6ax_e	EX_cpd01588_e	0	NA	NA	NA	NA	NA	NA	NA	NA	NA
PM3B	Nitrogen	d-Amino-N-Valeric acid	5aptn	cpd00339	EX_5aptn_e	EX_cpd00339_e	1	potential_element_sources	M9	aerobic	NA	NA	NA	1	NA	NA
PM3B	Nitrogen	Ala-Asp	ala_L_asp__L	cpd11593Â	EX_ala_L_asp__L_e	EX_cpd11593Â _e	1	potential_element_sources	M9	aerobic	NA	1	NA	NA	NA	NA
PM3B	Nitrogen	Ala-Gln	ala_gln	cpd11587	EX_ala_gln_e	EX_cpd11587_e	1	potential_element_sources	M9	aerobic	NA	1	NA	NA	NA	NA
PM3B	Nitrogen	Ala-Glu	ala_L_glu__L	cpd15388Â	EX_ala_L_glu__L_e	EX_cpd15388Â _e	1	potential_element_sources	M9	aerobic	NA	1	NA	NA	NA	NA
PM3B	Nitrogen	Ala-Gly	L_alagly	cpd11585	EX_L_alagly_e	EX_cpd11585_e	1	potential_element_sources	M9	aerobic	1	NA	NA	NA	NA	NA
PM3B	Nitrogen	Ala-His	ala_his	cpd11584	EX_ala_his_e	EX_cpd11584_e	1	potential_element_sources	M9	aerobic	NA	1	NA	NA	NA	NA
PM3B	Nitrogen	Ala-Leu	ala_leu	cpd11583	EX_ala_leu_e	EX_cpd11583_e	1	potential_element_sources	M9	aerobic	NA	1	NA	NA	NA	NA
PM3B	Nitrogen	Ala-Thr	ala_L_Thr__L	cpd23857	EX_ala_L_Thr__L_e	EX_cpd23857_e	1	NA	NA	NA	NA	NA	NA	NA	NA	NA
PM3B	Nitrogen	Gly-Asn	gly_asn__L	cpd11581	EX_gly_asn__L_e	EX_cpd11581_e	1	potential_element_sources	M9	aerobic	NA	1	NA	NA	NA	NA
PM3B	Nitrogen	Gly-Gln	gly_gln	cpd11580	EX_gly_gln_e	EX_cpd11580_e	1	potential_element_sources	M9	aerobic	NA	1	NA	NA	NA	NA
PM3B	Nitrogen	Gly-Glu	gly_glu__L	cpd24418Â	EX_gly_glu__L_e	EX_cpd24418Â _e	1	potential_element_sources	M9	aerobic	NA	1	NA	NA	NA	NA
PM3B	Nitrogen	Gly-Met	gly_met	cpd11591	EX_gly_met_e	EX_cpd11591_e	1	potential_element_sources	M9	aerobic	NA	1	NA	NA	NA	NA
PM3B	Nitrogen	Met-Ala	met_L_ala__L	cpd23854	EX_met_L_ala__L_e	EX_cpd23854_e	1	potential_element_sources	M9	aerobic	NA	1	NA	NA	NA	NA
PM4A	Phosphorus	Phosphate	pi	cpd00009	EX_pi_e	EX_cpd00009_e	0	potential_element_sources	M9	aerobic	1	1	1	NA	1	1
PM4A	Phosphorus	Pyrophosphate	ppi	cpd00012	EX_ppi_e	EX_cpd00012_e	0	NA	NA	NA	NA	NA	NA	NA	NA	NA
PM4A	Phosphorus	Trimetaphosphate	tmp	cpd01622	EX_tmp_e	EX_cpd01622_e	0	NA	NA	NA	NA	NA	NA	NA	NA	NA
PM4A	Phosphorus	Tripolyphosphate	pppi	cpd00421	EX_pppi_e	EX_cpd00421_e	0	NA	NA	NA	NA	NA	NA	NA	NA	NA
PM4A	Phosphorus	Adenosine 2`-Monophosphate	amp2p	cpd00700	EX_amp2p_e	EX_cpd00700_e	0	NA	NA	NA	NA	NA	NA	NA	NA	NA
PM4A	Phosphorus	Adenosine 3`-Monophosphate	3amp	cpd00988	EX_3amp_e	EX_cpd00988_e	1	potential_element_sources	M9	aerobic	1	1	NA	NA	NA	NA
PM4A	Phosphorus	Adenosine 5`-Monophosphate	amp	cpd00018	EX_amp_e	EX_cpd00018_e	1	potential_element_sources	M9	aerobic	1	1	NA	NA	NA	NA
PM4A	Phosphorus	Adenosine 2`,3`-Cyclic Monophosphate	23camp	cpd01570	EX_23camp_e	EX_cpd01570_e	1	potential_element_sources	M9	aerobic	1	1	NA	NA	NA	NA
PM4A	Phosphorus	Adenosine 3`,5`-Cyclic Monophosphate	camp	cpd00446	EX_camp_e	EX_cpd00446_e	0	NA	NA	NA	NA	NA	NA	NA	NA	NA
PM4A	Phosphorus	D,L-a-Glycerol Phosphate	glyc1p	cpd16494	EX_glyc1p_e	EX_cpd16494_e	1	NA	NA	NA	NA	NA	NA	NA	NA	NA
PM4A	Phosphorus	b-Glycerol Phosphate	glyc2p	cpd01908	EX_glyc2p_e	EX_cpd01908_e	1	potential_element_sources	M9	aerobic	1	1	NA	NA	NA	NA
PM4A	Phosphorus	Carbamyl Phosphate	cbp	cpd00146	EX_cbp_e	EX_cpd00146_e	1	NA	NA	NA	NA	NA	NA	NA	NA	NA
PM4A	Phosphorus	D-2-Phospho-Glyceric acid	2pg	cpd00482	EX_2pg_e	EX_cpd00482_e	0	NA	NA	NA	NA	NA	NA	NA	NA	NA
PM4A	Phosphorus	D-3-Phospho-Glyceric acid	3pg	cpd00169	EX_3pg_e	EX_cpd00169_e	0	NA	NA	NA	NA	NA	NA	NA	NA	NA
PM4A	Phosphorus	Guanosine 3`-Monophosphate	3gmp	cpd03701	EX_3gmp_e	EX_cpd03701_e	1	potential_element_sources	M9	aerobic	1	1	NA	NA	NA	NA
PM4A	Phosphorus	Guanosine 5`-Monophosphate	gmp	cpd00126	EX_gmp_e	EX_cpd00126_e	1	potential_element_sources	M9	aerobic	1	1	NA	NA	NA	NA
PM4A	Phosphorus	Guanosine 2`,3`-Cyclic Monophosphate	23cgmp	cpd03702	EX_23cgmp_e	EX_cpd03702_e	0	potential_element_sources	M9	aerobic	1	1	NA	NA	NA	NA
PM4A	Phosphorus	Guanosine 3`,5`-Cyclic Monophosphate	35cgmp	cpd00697	EX_35cgmp_e	EX_cpd00697_e	0	NA	NA	NA	NA	NA	NA	NA	NA	NA
PM4A	Phosphorus	Phosphoenol Pyruvate	pep	cpd00061	EX_pep_e	EX_cpd00061_e	0	NA	NA	NA	NA	NA	NA	NA	NA	NA
PM4A	Phosphorus	Phospho-Glycolic acid	2pglyc	cpd00727	EX_2pglyc_e	EX_cpd00727_e	1	NA	NA	NA	NA	NA	NA	NA	NA	NA
PM4A	Phosphorus	D-Glucose-1-Phosphate	g1p	cpd00089	EX_g1p_e	EX_cpd00089_e	1	potential_element_sources	M9	aerobic	1	1	NA	NA	NA	NA
PM4A	Phosphorus	D-Glucose-6-Phosphate	g6p	cpd00079	EX_g6p_e	EX_cpd00079_e	1	potential_element_sources	M9	aerobic	1	1	NA	NA	NA	0
PM4A	Phosphorus	2-Deoxy-D-Glucose 6-Phosphate	2doxg6p	cpd03805	EX_2doxg6p_e	EX_cpd03805_e	0	NA	NA	NA	NA	NA	NA	NA	NA	NA
PM4A	Phosphorus	D-Glucosamine-6-Phosphate	gam6p	cpd00288	EX_gam6p_e	EX_cpd00288_e	1	potential_element_sources	M9	aerobic	1	1	NA	NA	NA	NA
PM4A	Phosphorus	6-Phospho-Gluconic acid	6pgc	cpd00284	EX_6pgc_e	EX_cpd00284_e	0	NA	NA	NA	NA	NA	NA	NA	NA	NA
PM4A	Phosphorus	Cytidine 3`-Monophosphate	3cmp	cpd03454	EX_3cmp_e	EX_cpd03454_e	1	potential_element_sources	M9	aerobic	1	1	NA	NA	NA	NA
PM4A	Phosphorus	Cytidine 5`-Monophosphate	cmp	cpd00046	EX_cmp_e	EX_cpd00046_e	1	potential_element_sources	M9	aerobic	1	1	NA	NA	NA	NA
PM4A	Phosphorus	Cytidine 2`,3`-Cyclic Monophosphate	23ccmp	cpd01571	EX_23ccmp_e	EX_cpd01571_e	1	potential_element_sources	M9	aerobic	1	1	NA	NA	NA	NA
PM4A	Phosphorus	Cytidine 3`,5`-Cyclic Monophosphate	35ccmp	cpd00696	EX_35ccmp_e	EX_cpd00696_e	0	NA	NA	NA	NA	NA	NA	NA	NA	NA
PM4A	Phosphorus	D-Mannose-1-Phosphate	man1p	cpd00485	EX_man1p_e	EX_cpd00485_e	1	NA	NA	NA	NA	NA	NA	NA	NA	NA
PM4A	Phosphorus	D-Mannose-6-Phosphate	man6p	cpd00235	EX_man6p_e	EX_cpd00235_e	1	potential_element_sources	M9	aerobic	1	1	NA	NA	NA	NA
PM4A	Phosphorus	Phospho-L-Arginine	argp	cpd03535	EX_argp_e	EX_cpd03535_e	1	NA	NA	NA	NA	NA	NA	NA	NA	NA
PM4A	Phosphorus	O-Phospho-D-Serine	pser__D	cpd01665	EX_pser__D_e	EX_cpd01665_e	0	NA	NA	NA	NA	NA	NA	NA	NA	NA
PM4A	Phosphorus	O-Phospho-L-Serine	pser__L	cpd00738	EX_pser__L_e	EX_cpd00738_e	0	potential_element_sources	M9	aerobic	1	1	NA	NA	NA	NA
PM4A	Phosphorus	O-Phospho-L-Threonine	thrp	cpd08928	EX_thrp_e	EX_cpd08928_e	0	potential_element_sources	M9	aerobic	1	1	NA	NA	NA	NA
PM4A	Phosphorus	Uridine 3`-Monophosphate	3ump	cpd00989	EX_3ump_e	EX_cpd00989_e	1	potential_element_sources	M9	aerobic	1	1	NA	NA	NA	NA
PM4A	Phosphorus	Uridine 5`-Monophosphate	ump	cpd00091	EX_ump_e	EX_cpd00091_e	1	potential_element_sources	M9	aerobic	1	1	NA	NA	NA	NA
PM4A	Phosphorus	Uridine 2`,3`-Cyclic Monophosphate	23cump	cpd01572	EX_23cump_e	EX_cpd01572_e	1	potential_element_sources	M9	aerobic	1	1	NA	NA	NA	NA
PM4A	Phosphorus	O-Phospho-L-Tyrosine	tyrp	cpd03912	EX_tyrp_e	EX_cpd03912_e	1	potential_element_sources	M9	aerobic	1	1	NA	NA	NA	NA
PM4A	Phosphorus	Phosphocreatine	pcreat	cpd01550	EX_pcreat_e	EX_cpd01550_e	0	NA	NA	NA	NA	NA	NA	NA	NA	NA
PM4A	Phosphorus	Phosphoryl Choline	cholp	cpd00457	EX_cholp_e	EX_cpd00457_e	0	NA	NA	NA	NA	NA	NA	NA	NA	NA
PM4A	Phosphorus	O-Phosphoryl-Ethanolamine	ethamp	cpd00285	EX_ethamp_e	EX_cpd00285_e	0	NA	NA	NA	NA	NA	NA	NA	NA	NA
PM4A	Phosphorus	Phosphono Acetic acid	ppac	cpd03385	EX_ppac_e	EX_cpd03385_e	0	NA	NA	NA	NA	NA	NA	NA	NA	NA
PM4A	Phosphorus	2-Aminoethyl Phosphonic acid	2ameph	cpd02233	EX_2ameph_e	EX_cpd02233_e	0	potential_element_sources	M9	aerobic	NA	1	NA	NA	NA	NA
PM4A	Phosphorus	Thymidine 5`-Monophosphate	dtmp	cpd00298	EX_dtmp_e	EX_cpd00298_e	1	potential_element_sources	M9	aerobic	1	1	NA	NA	NA	NA
PM4A	Phosphorus	Inositol Hexaphosphate	mi1p__D	cpd00867	EX_mi1p__D_e	EX_cpd00867_e	0	NA	NA	NA	NA	NA	NA	NA	NA	NA
PM4A	Sulfur	Sulfate	so4	cpd00048	EX_so4_e	EX_cpd00048_e	0	potential_element_sources	M9	aerobic	1	1	1	1	1	1
PM4A	Sulfur	Thiosulfate	tsul	cpd00268	EX_tsul_e	EX_cpd00268_e	0	potential_element_sources	M9	aerobic	0	0	NA	0	0	NA
PM4A	Sulfur	Tetrathionate	tet	cpd01414	EX_tet_e	EX_cpd01414_e	0	NA	NA	NA	NA	NA	NA	NA	NA	NA
PM4A	Sulfur	L-Cysteine	cys__L	cpd00084	EX_cys__L_e	EX_cpd00084_e	0	potential_element_sources	M9	aerobic	1	0	1	NA	1	0
PM4A	Sulfur	D-Cysteine	cys__D	cpd00587	EX_cys__D_e	EX_cpd00587_e	0	potential_element_sources	M9	aerobic	1	0	NA	NA	NA	NA
PM4A	Sulfur	Cys-Gly	cgly	cpd01017	EX_cgly_e	EX_cpd01017_e	0	potential_element_sources	M9	aerobic	1	0	1	1	NA	NA
PM4A	Sulfur	L-Cysteic acid	Lcyst	cpd00395	EX_Lcyst_e	EX_cpd00395_e	0	NA	NA	NA	NA	NA	NA	NA	NA	NA
PM4A	Sulfur	Cysteamine	cysam	cpd01160	EX_cysam_e	EX_cpd01160_e	0	NA	NA	NA	NA	NA	NA	NA	NA	NA
PM4A	Sulfur	L-Cysteine Sulfinic acid	3sala	cpd00467	EX_3sala_e	EX_cpd00467_e	0	NA	NA	NA	NA	NA	NA	NA	NA	NA
PM4A	Sulfur	N-Acetyl-L-Cysteine	CE1310	cpd04181	EX_CE1310_e	EX_cpd04181_e	0	NA	NA	NA	NA	NA	NA	NA	NA	NA
PM4A	Sulfur	Cystathionine	cyst__L	cpd00424	EX_cyst__L_e	EX_cpd00424_e	0	NA	NA	NA	NA	NA	NA	NA	NA	NA
PM4A	Sulfur	Lanthionine	lanth	cpd11577	EX_lanth_e	EX_cpd11577_e	0	NA	NA	NA	NA	NA	NA	NA	NA	NA
PM4A	Sulfur	Glutathione	gthox	cpd00111	EX_gthox_e	EX_cpd00111_e	0	potential_element_sources	M9	aerobic	0	NA	NA	1	NA	NA
PM4A	Sulfur	L-Methionine	met__L	cpd00060	EX_met__L_e	EX_cpd00060_e	0	potential_element_sources	M9	aerobic	1	0	NA	NA	1	0
PM4A	Sulfur	D-Methionine	met__D	cpd00637	EX_met__D_e	EX_cpd00637_e	1	potential_element_sources	M9	aerobic	0	0	NA	NA	NA	NA
PM4A	Sulfur	Gly-Met	gly_met	cpd11591	EX_gly_met_e	EX_cpd11591_e	1	potential_element_sources	M9	aerobic	NA	0	NA	NA	NA	NA
PM4A	Sulfur	N-Acetyl-D,L-Methionine	acmet	cpd24446	EX_acmet_e	EX_cpd24446_e	0	NA	NA	NA	NA	NA	NA	NA	NA	NA
PM4A	Sulfur	L-Methionine Sulfoxide	metsox_S__L	cpd01914	EX_metsox_S__L_e	EX_cpd01914_e	0	potential_element_sources	M9	aerobic	0	0	NA	NA	NA	NA
PM4A	Sulfur	L-Djenkolic acid	djenk	cpd05190	EX_djenk_e	EX_cpd05190_e	0	NA	NA	NA	NA	NA	NA	NA	NA	NA
PM4A	Sulfur	D,L-Lipoamide	lpam	cpd00213	EX_lpam_e	EX_cpd00213_e	0	NA	NA	NA	NA	NA	NA	NA	NA	NA
PM4A	Sulfur	Taurocholic acid	tchola	cpd03047	EX_tchola_e	EX_cpd03047_e	0	NA	NA	NA	NA	NA	NA	NA	NA	NA
PM4A	Sulfur	Taurine	taur	cpd00210	EX_taur_e	EX_cpd00210_e	0	potential_element_sources	M9	aerobic	0	0	NA	0	1	0
PM4A	Sulfur	Hypotaurine	hyptaur	cpd00406	EX_hyptaur_e	EX_cpd00406_e	0	NA	NA	NA	NA	NA	NA	NA	NA	NA
PM4A	Sulfur	Butane Sulfonic acid	butso3	cpd11596	EX_butso3_e	EX_cpd11596_e	0	potential_element_sources	M9	aerobic	0	0	NA	NA	NA	NA
PM4A	Sulfur	2-Hydroxyethane Sulfonic acid	isetac	cpd03048	EX_isetac_e	EX_cpd03048_e	0	potential_element_sources	M9	aerobic	1	0	NA	NA	NA	NA
PM4A	Sulfur	Methane Sulfonic acid	mso3	cpd08023	EX_mso3_e	EX_cpd08023_e	0	potential_element_sources	M9	aerobic	0	0	NA	0	NA	NA

## Sheet: 2.BIOLOG_growth_data_KPPR1
Plate	Source	Chemical	BiGG_ID	SEED_ID	exchange	SEED_exchange	KPPR1_BIOLOG_growth	Notes
PM1	Carbon	L-Arabinose	arab__L	cpd00224	EX_arab__L_e	EX_cpd00224_e	1
PM1	Carbon	N-Acetyl-D-Glucosamine	acgam	cpd00122	EX_acgam_e	EX_cpd00122_e	1
PM1	Carbon	D-Saccharic acid	glcr	cpd00571	EX_glcr_e	EX_cpd00571_e	1
PM1	Carbon	Succinic acid	succ	cpd00036	EX_succ_e	EX_cpd00036_e	1
PM1	Carbon	D-Galactose	gal	cpd00108	EX_gal_e	EX_cpd00108_e	1
PM1	Carbon	L-Aspartic acid	asp__L	cpd00041	EX_asp__L_e	EX_cpd00041_e	1
PM1	Carbon	L-Proline	pro__L	cpd00129	EX_pro__L_e	EX_cpd00129_e	1
PM1	Carbon	D-Alanine	ala__D	cpd00117	EX_ala__D_e	EX_cpd00117_e	1
PM1	Carbon	D-Trehalose	tre	cpd00794	EX_tre_e	EX_cpd00794_e	1
PM1	Carbon	D-Mannose	man	cpd00138	EX_man_e	EX_cpd00138_e	1
PM1	Carbon	Dulcitol	galt	cpd01171	EX_galt_e	EX_cpd01171_e	0
PM1	Carbon	D-Serine	ser__D	cpd00550	EX_ser__D_e	EX_cpd00550_e	1
PM1	Carbon	D-Sorbitol	sbt__D	cpd00588	EX_sbt__D_e	EX_cpd00588_e	1
PM1	Carbon	Glycerol	glyc	cpd00100	EX_glyc_e	EX_cpd00100_e	1
PM1	Carbon	L-Fucose	fuc__L	cpd00751	EX_fuc__L_e	EX_cpd00751_e	1
PM1	Carbon	D-Glucuronic acid	glcur	cpd00164	EX_glcur_e	EX_cpd00164_e	1
PM1	Carbon	D-Gluconic acid	glcn	cpd00222	EX_glcn_e	EX_cpd00222_e	1
PM1	Carbon	D,L-a-Glycerol Phosphate	glyc1p	cpd16494	EX_glyc1p_e	EX_cpd16494_e	1
PM1	Carbon	D-Xylose	xyl__D	cpd00154	EX_xyl__D_e	EX_cpd00154_e	1
PM1	Carbon	L-Lactic acid	lac__L	cpd00159	EX_lac__L_e	EX_cpd00159_e	1
PM1	Carbon	Formic acid	for	cpd00047	EX_for_e	EX_cpd00047_e	1
PM1	Carbon	D-Mannitol	mnl	cpd00314	EX_mnl_e	EX_cpd00314_e	1
PM1	Carbon	L-Glutamic acid	glu__L	cpd00023	EX_glu__L_e	EX_cpd00023_e	1
PM1	Carbon	D-Glucose-6-Phosphate	g6p	cpd00079	EX_g6p_e	EX_cpd00079_e	1
PM1	Carbon	D-Galactonic acid-g-Lactone	gullac	cpd00765	EX_gullac_e	EX_cpd00765_e	0
PM1	Carbon	D,L-Malic acid	mal__L	cpd00130	EX_mal__L_e	EX_cpd00130_e	1
PM1	Carbon	D-Ribose	rib__D	cpd00105	EX_rib__D_e	EX_cpd00105_e	1
PM1	Carbon	Tween 20	NA	cpd13391	NA	EX_cpd13391_e	0
PM1	Carbon	L-Rhamnose	rmn	cpd00396	EX_rmn_e	EX_cpd00396_e	1
PM1	Carbon	D-Fructose	fru	cpd00082	EX_fru_e	EX_cpd00082_e	1
PM1	Carbon	Acetic acid	ac	cpd00029	EX_ac_e	EX_cpd00029_e	1
PM1	Carbon	a-D-Glucose	glc__aD	NA	EX_glc__aD_e	NA	1
PM1	Carbon	Maltose	malt	cpd00179	EX_malt_e	EX_cpd00179_e	1
PM1	Carbon	D-Melibiose	melib	cpd03198	EX_melib_e	EX_cpd03198_e	1
PM1	Carbon	Thymidine	thymd	cpd00184	EX_thymd_e	EX_cpd00184_e	1
PM1	Carbon	L-Asparagine	asn__L	cpd00132	EX_asn__L_e	EX_cpd00132_e	1
PM1	Carbon	D-Aspartic acid	asp__D	cpd00320	EX_asp__D_e	EX_cpd00320_e	0
PM1	Carbon	D-Glucosaminic acid	NA	cpd02351	NA	EX_cpd02351_e	0
PM1	Carbon	1,2-Propanediol	12ppd__S	cpd19024	EX_12ppd__S_e	EX_cpd19024_e	0
PM1	Carbon	Tween 40	NA	cpd24417	NA	EX_cpd24417_e	0
PM1	Carbon	a-Ketoglutaric acid	akg	cpd00024	EX_akg_e	EX_cpd00024_e	0
PM1	Carbon	a-Ketobutyric acid	2obut	cpd00094	EX_2obut_e	EX_cpd00094_e	0
PM1	Carbon	a-Methyl-D-Galactoside	NA	cpd02274	NA	EX_cpd02274_e	1
PM1	Carbon	a-D-Lactose	NA	NA	NA	NA	1	Unknown IDs
PM1	Carbon	Lactulose	NA	cpd04349	NA	EX_cpd04349_e	1
PM1	Carbon	Sucrose	sucr	cpd00076	EX_sucr_e	EX_cpd00076_e	1
PM1	Carbon	Uridine	uri	cpd00249	EX_uri_e	EX_cpd00249_e	1
PM1	Carbon	L-Glutamine	gln__L	cpd00053	EX_gln__L_e	EX_cpd00053_e	1
PM1	Carbon	m-Tartaric acid	tartr__M	cpd00432	EX_tartr__M_e	EX_cpd00432_e	0
PM1	Carbon	D-Glucose-1-Phosphate	g1p	cpd00089	EX_g1p_e	EX_cpd00089_e	1
PM1	Carbon	D-Fructose-6-Phosphate	f6p	cpd00072	EX_f6p_e	EX_cpd00072 _e	1
PM1	Carbon	Tween 80	NA	cpd13392	NA	EX_cpd13392_e	0
PM1	Carbon	a-Hydroxyglutaric acid-g-Lactone	NA	NA	NA	NA	0	Unknown IDs
PM1	Carbon	a-Hydroxybutyric acid	2hb	cpd03561	EX_2hb_e	EX_cpd03561_e	0
PM1	Carbon	b-Methyl-D-Glucoside	NA	cpd11603	NA	EX_cpd11603_e	1
PM1	Carbon	Adonitol	rbt	cpd00366	EX_rbt_e	EX_cpd00366_e	1
PM1	Carbon	Maltotriose	malttr	cpd01262	EX_malttr_e	EX_cpd01262_e	1
PM1	Carbon	2`-Deoxyadenosine	dad_2	cpd00438	EX_dad_2_e	EX_cpd00438_e	1
PM1	Carbon	Adenosine	adn	cpd00182	EX_adn_e	EX_cpd00182_e	1
PM1	Carbon	Gly-Asp	gly_asp__L	cpd11589	EX_gly_asp__L_e	EX_cpd11589_e	1
PM1	Carbon	Citric acid	cit	cpd00137	EX_cit_e	EX_cpd00137_e	1
PM1	Carbon	m-Inositol	inost	cpd00121	EX_inost_e	EX_cpd00121_e	1
PM1	Carbon	D-Threonine	NA	cpd00611	NA	EX_cpd00611_e	0
PM1	Carbon	Fumaric acid	fum	cpd00106	EX_fum_e	EX_cpd00106_e	1
PM1	Carbon	Bromosuccinic acid	NA	cpd23859	NA	EX_cpd23859_e	1
PM1	Carbon	Propionic acid	ppa	cpd00141	EX_ppa_e	EX_cpd00141_e	0
PM1	Carbon	Mucic acid	galct__D	cpd00652	EX_galct__D_e	EX_cpd00652_e	1
PM1	Carbon	Glycolic acid	glyclt	cpd00139	EX_glyclt_e	EX_cpd00139_e	0
PM1	Carbon	Glyoxylic acid	glx	cpd00040	EX_glx_e	EX_cpd00040_e	0
PM1	Carbon	D-Cellobiose	cellb	cpd00158	EX_cellb_e	EX_cpd00158_e	1
PM1	Carbon	Inosine	ins	cpd00246	EX_ins_e	EX_cpd00246_e	1
PM1	Carbon	Gly-Glu	gly_glu__L	cpd24418	EX_gly_glu__L_e	EX_cpd24418 _e	1
PM1	Carbon	Tricarballylic acid	tcb	cpd16654	EX_tcb_e	EX_cpd16654_e	0
PM1	Carbon	L-Serine	ser__L	cpd00054	EX_ser__L_e	EX_cpd00054_e	1
PM1	Carbon	L-Threonine	thr__L	cpd00161	EX_thr__L_e	EX_cpd00161_e	1
PM1	Carbon	L-Alanine	ala__L	cpd00035	EX_ala__L_e	EX_cpd00035_e	1
PM1	Carbon	Ala-Gly	L_alagly	cpd11585	EX_L_alagly_e	EX_cpd11585_e	1
PM1	Carbon	Acetoacetic acid	acac	cpd00142	EX_acac_e	EX_cpd00142_e	0
PM1	Carbon	N-Acetyl-D-Mannosamine	acmana	cpd00492	EX_acmana_e	EX_cpd00492_e	1
PM1	Carbon	Mono-Methylsuccinate	NA	NA	NA	NA	0	Unknown IDs
PM1	Carbon	Methylpyruvate	NA	cpd24420	NA	EX_cpd24420_e	1
PM1	Carbon	D-Malic acid	mal__D	cpd00386	EX_mal__D_e	EX_cpd00386_e	0
PM1	Carbon	L-Malic acid	mal__L	cpd00130	EX_mal__L_e	EX_cpd00130_e	1
PM1	Carbon	Gly-Pro	gly_pro__L	cpd11588	EX_gly_pro__L_e	EX_cpd11588_e	1
PM1	Carbon	p-Hydroxyphenyl Acetic acid	4hoxpac	cpd00489	EX_4hoxpac_e	EX_cpd00489_e	1
PM1	Carbon	m-Hydroxyphenyl Acetic acid	3hoxpac	cpd03320	EX_3hoxpac_e	EX_cpd03320 _e	1
PM1	Carbon	Tyramine	tym	cpd00374	EX_tym_e	EX_cpd00374_e	1
PM1	Carbon	D-Psicose	NA	cpd03884	NA	EX_cpd03884_e	0
PM1	Carbon	L-Lyxose	lyx__L	cpd01067	EX_lyx__L_e	EX_cpd01067_e	1
PM1	Carbon	Glucuronamide	NA	cpd26269	NA	EX_cpd26269_e	1
PM1	Carbon	Pyruvic acid	pyr	cpd00020	EX_pyr_e	EX_cpd00020_e	1
PM1	Carbon	L-Galactonic acid-g-Lactone	NA	cpd00820	NA	EX_cpd00820_e	1
PM1	Carbon	D-Galacturonic acid	galur	cpd00280	EX_galur_e	EX_cpd00280_e	1
PM1	Carbon	Phenylethylamine	peamn	cpd03161	EX_peamn_e	EX_cpd03161_e	0
PM1	Carbon	2-Aminoethanol	etha	cpd00162	EX_etha_e	EX_cpd00162_e	0
PM2A	Carbon	Chondroitin Sulfate C	cs_c	cpd11717	EX_cs_c_e	EX_cpd11717 _e	0
PM2A	Carbon	a-Cyclodextrin	NA	cpd24451	NA	EX_cpd24451_e	0
PM2A	Carbon	b-Cyclodextrin	NA	cpd09394	NA	EX_cpd09394_e	0
PM2A	Carbon	g-Cyclodextrin	NA	cpd24452	NA	EX_cpd24452_e	0
PM2A	Carbon	Dextrin	dextrin	cpd11594	EX_dextrin_e	EX_cpd11594_e	1
PM2A	Carbon	Gelatin	NA	cpd11879	NA	EX_cpd11879_e	0
PM2A	Carbon	Glycogen	glycogen	cpd00155	EX_glycogen_e	EX_cpd00155_e	0
PM2A	Carbon	Inulin	NA	cpd11602	NA	EX_cpd11602_e	0
PM2A	Carbon	Laminarin	NA	cpd11748	NA	EX_cpd11748_e	0
PM2A	Carbon	Mannan	mannan	cpd11685	EX_mannan_e	EX_cpd11685_e	0
PM2A	Carbon	Pectin	pectin	cpd11601	EX_pectin_e	EX_cpd11601_e	1
PM2A	Carbon	N-Acetyl-D-Galactosamine	acgal	cpd00832	EX_acgal_e	EX_cpd00832_e	0
PM2A	Carbon	N-Acetyl-Neuraminic acid	acnam	cpd00232	EX_acnam_e	EX_cpd00232_e	0
PM2A	Carbon	b-D-Allose	all__D	cpd01055	EX_all__D_e	EX_cpd01055_e	0
PM2A	Carbon	Amygdalin	NA	cpd01356	NA	EX_cpd01356_e	0
PM2A	Carbon	D-Arabinose	arab__D	cpd00185	EX_arab__D_e	EX_cpd00185_e	0
PM2A	Carbon	D-Arabitol	abt__D	cpd01307	EX_abt__D_e	EX_cpd01307_e	1
PM2A	Carbon	L-Arabitol	abt__L	cpd00417	EX_abt__L_e	EX_cpd00417_e	0
PM2A	Carbon	Arbutin	arbt	cpd03696	EX_arbt_e	EX_cpd03696_e	1
PM2A	Carbon	2-Deoxy-D-Ribose	drib	cpd01242	EX_drib_e	EX_cpd01242_e	0
PM2A	Carbon	i-Erythritol	NA	cpd00392	NA	EX_cpd00392_e	0
PM2A	Carbon	D-Fucose	NA	cpd00750	NA	EX_cpd00750_e	1
PM2A	Carbon	3-O-b-D-Galactopyranosyl-D-Arabinose	NA	cpd24453	NA	EX_cpd24453 _e	1
PM2A	Carbon	Gentiobiose	NA	cpd05158	NA	EX_cpd05158_e	1
PM2A	Carbon	L-Glucose	NA	cpd24421	NA	EX_cpd24421_e	0
PM2A	Carbon	D-Lactitol	NA	cpd09457	NA	EX_cpd09457_e	1
PM2A	Carbon	D-Melezitose	NA	cpd05161	NA	EX_cpd05161_e	0
PM2A	Carbon	Maltitol	NA	cpd37280	NA	EX_cpd37280 _e	1
PM2A	Carbon	a-Methyl-D-Glucoside	amdglc	cpd15584	EX_amdglc_e	EX_cpd15584_e	0
PM2A	Carbon	b-Methyl-D-Galactoside	gal_bD	cpd00709	EX_gal_bD_e	EX_cpd00709_e	1
PM2A	Carbon	3-Methylglucose	NA	NA	NA	NA	0	Unknown IDs
PM2A	Carbon	b-Methyl-D-Glucuronic acid	metglcur	NA	EX_metglcur_e	NA	0
PM2A	Carbon	a-Methyl-D-Mannoside	NA	cpd24424	NA	EX_cpd24424_e	0
PM2A	Carbon	b-Methyl-D-Xyloside	NA	cpd24425	NA	EX_cpd24425_e	0
PM2A	Carbon	Palatinose	pala	cpd01200	EX_pala_e	EX_cpd01200_e	1
PM2A	Carbon	D-Raffinose	raffin	cpd00382	EX_raffin_e	EX_cpd00382_e	1
PM2A	Carbon	Salicin	salcn	cpd01030	EX_salcn_e	EX_cpd01030_e	1
PM2A	Carbon	Sedoheptulosan	NA	cpd24426	NA	EX_cpd24426_e	0
PM2A	Carbon	L-Sorbose	srb__L	cpd00212	EX_srb__L_e	EX_cpd00212_e	1
PM2A	Carbon	Stachyose	stys	cpd01133	EX_stys_e	EX_cpd01133_e	1
PM2A	Carbon	D-Tagatose	tag__D	cpd00589	EX_tag__D_e	EX_cpd00589_e	0
PM2A	Carbon	Turanose	tur	cpd20885	EX_tur_e	EX_cpd20885_e	0
PM2A	Carbon	Xylitol	xylt	cpd00306	EX_xylt_e	EX_cpd00306_e	0
PM2A	Carbon	N-Acetyl-D-Glucosaminitol	NA	cpd24427	NA	EX_cpd24427_e	0
PM2A	Carbon	g-Amino-N-Butyric acid	4abut	cpd00281	EX_4abut_e	EX_cpd00281_e	1
PM2A	Carbon	d-Amino Valeric acid	NA	NA	NA	NA	0	Unknown IDs
PM2A	Carbon	Butyric acid	but	cpd00211	EX_but_e	EX_cpd00211_e	0
PM2A	Carbon	Capric acid	dca	cpd01107	EX_dca_e	EX_cpd01107_e	0
PM2A	Carbon	Caproic acid	caproic	cpd28989	EX_caproic_e	EX_cpd28989 _e	0
PM2A	Carbon	Citraconic acid	citac	cpd01502	EX_citac_e	EX_cpd01502_e	0
PM2A	Carbon	Citramalic acid	citm	cpd00607	EX_citm_e	EX_cpd00607_e	0
PM2A	Carbon	D-Glucosamine	gam	cpd00276	EX_gam_e	EX_cpd00276_e	1
PM2A	Carbon	2-Hydroxybenzoic acid	salc	cpd00599	EX_salc_e	EX_cpd00599_e	0
PM2A	Carbon	4-Hydroxybenzoic acid	4hbz	cpd00136	EX_4hbz_e	EX_cpd00136_e	0
PM2A	Carbon	b-Hydroxybutyric acid	bhb	cpd00797	EX_bhb_e	EX_cpd00797_e	1
PM2A	Carbon	g-Hydroxybutyric acid	ghb	cpd00728	EX_ghb_e	EX_cpd00728_e	0
PM2A	Carbon	a-Keto-Valeric acid	NA	NA	NA	NA	0	Unknown IDs
PM2A	Carbon	Itaconic acid	itacon	cpd00380	EX_itacon_e	EX_cpd00380_e	0
PM2A	Carbon	5-Keto-D-Gluconic acid	5dglcn	cpd00781	EX_5dglcn_e	EX_cpd00781_e	0
PM2A	Carbon	D-Lactic acid Methyl Ester	NA	cpd24428	NA	EX_cpd24428_e	0
PM2A	Carbon	Malonic acid	malon	cpd00308	EX_malon_e	EX_cpd00308_e	1
PM2A	Carbon	Melibionic acid	NA	cpd24454	NA	EX_cpd24454_e	1
PM2A	Carbon	Oxalic acid	oxa	cpd00180	EX_oxa_e	EX_cpd00180_e	0
PM2A	Carbon	Oxalomalic acid	NA	cpd01363	NA	EX_cpd01363_e	0
PM2A	Carbon	Quinic acid	quin	cpd00248	EX_quin_e	EX_cpd00248_e	1
PM2A	Carbon	D-Ribono-1,4-Lactone	NA	cpd23861	NA	EX_cpd23861_e	0
PM2A	Carbon	Sebacic acid	sebacid	cpd05192	EX_sebacid_e	EX_cpd05192 _e	0
PM2A	Carbon	Sorbic acid	NA	cpd16648	NA	EX_cpd16648_e	0
PM2A	Carbon	Succinamic acid	NA	cpd25518	NA	EX_cpd25518_e	0
PM2A	Carbon	D-Tartaric acid	tartr__D	cpd19018	EX_tartr__D_e	EX_cpd19018_e	0
PM2A	Carbon	L-Tartaric acid	tartr__L	cpd00666	EX_tartr__L_e	EX_cpd00666 _e	1
PM2A	Carbon	Acetamide	ad	cpd03734	EX_ad_e	EX_cpd03734_e	0
PM2A	Carbon	L-Alaninamide	NA	cpd23030	NA	EX_cpd23030_e	0
PM2A	Carbon	N-Acetyl-L-Glutamic acid	acglu	cpd00477	EX_acglu_e	EX_cpd00477_e	0
PM2A	Carbon	L-Arginine	arg__L	cpd00051	EX_arg__L_e	EX_cpd00051_e	1
PM2A	Carbon	Glycine	gly	cpd00033	EX_gly_e	EX_cpd00033_e	0
PM2A	Carbon	L-Histidine	his__L	cpd00119	EX_his__L_e	EX_cpd00119_e	1
PM2A	Carbon	L-Homoserine	hom__L	cpd00227	EX_hom__L_e	EX_cpd00227_e	0
PM2A	Carbon	Hydroxy-L-Proline	4hpro_LT	cpd00851	EX_4hpro_LT_e	EX_cpd00851_e	0
PM2A	Carbon	L-Isoleucine	ile__L	cpd00322	EX_ile__L_e	EX_cpd00322_e	0
PM2A	Carbon	L-Leucine	leu__L	cpd00107	EX_leu__L_e	EX_cpd00107_e	0
PM2A	Carbon	L-Lysine	lys__L	cpd00039	EX_lys__L_e	EX_cpd00039_e	0
PM2A	Carbon	L-Methionine	met__L	cpd00060	EX_met__L_e	EX_cpd00060_e	0
PM2A	Carbon	L-Ornithine	orn	cpd00064	EX_orn_e	EX_cpd00064 _e	1
PM2A	Carbon	L-Phenylalanine	phe__L	cpd00066	EX_phe__L_e	EX_cpd00066_e	0
PM2A	Carbon	L-Pyroglutamic acid	5oxpro	cpd01293	EX_5oxpro_e	EX_cpd01293_e	0
PM2A	Carbon	L-Valine	val__L	cpd00156	EX_val__L_e	EX_cpd00156_e	0
PM2A	Carbon	D,L-Carnitine	crn	cpd00266	EX_crn_e	EX_cpd00266_e	0
PM2A	Carbon	sec-Butylamine	NA	cpd24429	NA	EX_cpd24429_e	0
PM2A	Carbon	D,L-Octopamine	NA	cpd02599	NA	EX_cpd02599_e	1
PM2A	Carbon	Putrescine	ptrc	cpd00118	EX_ptrc_e	EX_cpd00118_e	1
PM2A	Carbon	Dihydroxyacetone	dha	cpd00157	EX_dha_e	EX_cpd00157_e	1
PM2A	Carbon	2,3-Butanediol	btd_RR	cpd01947	EX_btd_RR_e	EX_cpd01947_e	0
PM2A	Carbon	2,3-Butanedione	diact	cpd00551	EX_diact_e	EX_cpd00551_e	0
PM2A	Carbon	3-Hydroxy-2-butanone	R_actn	cpd00361	EX_R_actn_e	EX_cpd00361_e	0
PM3B	Nitrogen	Ammonia	nh3	cpd00013	EX_nh3_e	EX_cpd00013_e	1
PM3B	Nitrogen	Nitrite	no2	cpd00075	EX_no2_e	EX_cpd00075_e	0
PM3B	Nitrogen	Nitrate	no3	cpd00209	EX_no3_e	EX_cpd00209_e	0
PM3B	Nitrogen	Urea	urea	cpd00073	EX_urea_e	EX_cpd00073_e	0
PM3B	Nitrogen	Biuret	NA	cpd03963	NA	EX_cpd03963_e	0
PM3B	Nitrogen	L-Alanine	ala__L	cpd00035	EX_ala__L_e	EX_cpd00035_e	1
PM3B	Nitrogen	L-Arginine	arg__L	cpd00051	EX_arg__L_e	EX_cpd00051_e	1
PM3B	Nitrogen	L-Asparagine	asn__L	cpd00132	EX_asn__L_e	EX_cpd00132_e	1
PM3B	Nitrogen	L-Aspartic acid	asp__L	cpd00041	EX_asp__L_e	EX_cpd00041_e	1
PM3B	Nitrogen	L-Cysteine	cys__L	cpd00084	EX_cys__L_e	EX_cpd00084_e	1
PM3B	Nitrogen	L-Glutamic acid	glu__L	cpd00023	EX_glu__L_e	EX_cpd00023_e	1
PM3B	Nitrogen	L-Glutamine	gln__L	cpd00053	EX_gln__L_e	EX_cpd00053_e	1
PM3B	Nitrogen	Glycine	gly	cpd00033	EX_gly_e	EX_cpd00033_e	1
PM3B	Nitrogen	L-Histidine	his__L	cpd00119	EX_his__L_e	EX_cpd00119_e	1
PM3B	Nitrogen	L-Isoleucine	ile__L	cpd00322	EX_ile__L_e	EX_cpd00322_e	0
PM3B	Nitrogen	L-Leucine	leu__L	cpd00107	EX_leu__L_e	EX_cpd00107_e	0
PM3B	Nitrogen	L-Lysine	lys__L	cpd00039	EX_lys__L_e	EX_cpd00039_e	1
PM3B	Nitrogen	L-Methionine	met__L	cpd00060	EX_met__L_e	EX_cpd00060_e	0
PM3B	Nitrogen	L-Phenylalanine	phe__L	cpd00066	EX_phe__L_e	EX_cpd00066_e	1
PM3B	Nitrogen	L-Proline	pro__L	cpd00129	EX_pro__L_e	EX_cpd00129_e	1
PM3B	Nitrogen	L-Serine	ser__L	cpd00054	EX_ser__L_e	EX_cpd00054_e	1
PM3B	Nitrogen	L-Threonine	thr__L	cpd00161	EX_thr__L_e	EX_cpd00161_e	1
PM3B	Nitrogen	L-Tryptophan	trp__L	cpd00065	EX_trp__L_e	EX_cpd00065_e	0
PM3B	Nitrogen	L-Tyrosine	tyr__L	cpd00069	EX_tyr__L_e	EX_cpd00069_e	1
PM3B	Nitrogen	L-Valine	val__L	cpd00156	EX_val__L_e	EX_cpd00156_e	0
PM3B	Nitrogen	D-Alanine	ala__D	cpd00117	EX_ala__D_e	EX_cpd00117_e	1
PM3B	Nitrogen	D-Asparagine	asn__D	cpd01308	EX_asn__D_e	EX_cpd01308 _e	0
PM3B	Nitrogen	D-Aspartic acid	asp__D	cpd00320	EX_asp__D_e	EX_cpd00320_e	0
PM3B	Nitrogen	D-Glutamic acid	glu__D	cpd00186	EX_glu__D_e	EX_cpd00186_e	1
PM3B	Nitrogen	D-Lysine	lys__D	cpd00549	EX_lys__D_e	EX_cpd00549_e	0
PM3B	Nitrogen	D-Serine	ser__D	cpd00550	EX_ser__D_e	EX_cpd00550_e	1
PM3B	Nitrogen	D-Valine	val__D	cpd03840	EX_val__D_e	EX_cpd03840_e	0
PM3B	Nitrogen	L-Citrulline	citr__L	cpd00274	EX_citr__L_e	EX_cpd00274_e	0
PM3B	Nitrogen	L-Homoserine	hom__L	cpd00227	EX_hom__L_e	EX_cpd00227_e	0
PM3B	Nitrogen	L-Ornithine	orn	cpd00064	EX_orn_e	EX_cpd00064 _e	1
PM3B	Nitrogen	N-Acetyl-L-Glutamic acid	acglu	cpd00477	EX_acglu_e	EX_cpd00477_e	0
PM3B	Nitrogen	N-Phthaloyl-L-Glutamic acid	NA	cpd24431	NA	EX_cpd24431_e	0
PM3B	Nitrogen	L-Pyroglutamic acid	5oxpro	cpd01293	EX_5oxpro_e	EX_cpd01293_e	0
PM3B	Nitrogen	Hydroxylamine	ham	cpd00165	EX_ham_e	EX_cpd00165_e	0
PM3B	Nitrogen	Methylamine	mma	cpd00187	EX_mma_e	EX_cpd00187_e	0
PM3B	Nitrogen	N-Amylamine	NA	cpd24432	NA	EX_cpd24432_e	0
PM3B	Nitrogen	N-Butylamine	NA	cpd19969	NA	EX_cpd19969_e	0
PM3B	Nitrogen	Ethylamine	NA	cpd00591	NA	EX_cpd00591_e	0
PM3B	Nitrogen	Ethanolamine	etha	cpd00162	EX_etha_e	EX_cpd00162_e	0
PM3B	Nitrogen	Ethylenediamine	NA	cpd24433	NA	EX_cpd24433_e	1
PM3B	Nitrogen	Putrescine	ptrc	cpd00118	EX_ptrc_e	EX_cpd00118_e	1
PM3B	Nitrogen	Agmatine	agm	cpd00152	EX_agm_e	EX_cpd00152_e	1
PM3B	Nitrogen	Histamine	hista	cpd00312	EX_hista_e	EX_cpd00312_e	0
PM3B	Nitrogen	b-Phenylethylamine	peamn	cpd03161	EX_peamn_e	EX_cpd03161_e	0
PM3B	Nitrogen	Tyramine	tym	cpd00374	EX_tym_e	EX_cpd00374_e	1
PM3B	Nitrogen	Acetamide	ad	cpd03734	EX_ad_e	EX_cpd03734_e	0
PM3B	Nitrogen	Formamide	frmd	cpd00378	EX_frmd_e	EX_cpd00378_e	0
PM3B	Nitrogen	Glucuronamide	NA	cpd26269	NA	EX_cpd26269_e	1
PM3B	Nitrogen	D,L-Lactamide	NA	cpd23860	NA	EX_cpd23860_e	0
PM3B	Nitrogen	D-Glucosamine	gam	cpd00276	EX_gam_e	EX_cpd00276_e	1
PM3B	Nitrogen	D-Galactosamine	galam	NA	EX_galam_e	NA	1
PM3B	Nitrogen	D-Mannosamine	NA	cpd02241	NA	EX_cpd02241_e	1
PM3B	Nitrogen	N-Acetyl-D-Glucosamine	acgam	cpd00122	EX_acgam_e	EX_cpd00122_e	1
PM3B	Nitrogen	N-Acetyl-D-Galactosamine	acgal	cpd00832	EX_acgal_e	EX_cpd00832_e	0
PM3B	Nitrogen	N-Acetyl-D-Mannosamine	acmana	cpd00492	EX_acmana_e	EX_cpd00492_e	1
PM3B	Nitrogen	Adenine	ade	cpd00128	EX_ade_e	EX_cpd00128_e	0
PM3B	Nitrogen	Adenosine	adn	cpd00182	EX_adn_e	EX_cpd00182_e	1
PM3B	Nitrogen	Cytidine	cytd	cpd00367	EX_cytd_e	EX_cpd00367_e	1
PM3B	Nitrogen	Cytosine	csn	cpd00307	EX_csn_e	EX_cpd00307_e	0
PM3B	Nitrogen	Guanine	gua	cpd00207	EX_gua_e	EX_cpd00207_e	0
PM3B	Nitrogen	Guanosine	gsn	cpd00311	EX_gsn_e	EX_cpd00311_e	1
PM3B	Nitrogen	Thymine	thym	cpd00151	EX_thym_e	EX_cpd00151_e	0
PM3B	Nitrogen	Thymidine	thymd	cpd00184	EX_thymd_e	EX_cpd00184_e	1
PM3B	Nitrogen	Uracil	ura	cpd00092	EX_ura_e	EX_cpd00092_e	0
PM3B	Nitrogen	Uridine	uri	cpd00249	EX_uri_e	EX_cpd00249_e	1
PM3B	Nitrogen	Inosine	ins	cpd00246	EX_ins_e	EX_cpd00246_e	1
PM3B	Nitrogen	Xanthine	xan	cpd00309	EX_xan_e	EX_cpd00309_e	1
PM3B	Nitrogen	Xanthosine	xtsn	cpd01217	EX_xtsn_e	EX_cpd01217_e	0
PM3B	Nitrogen	Uric acid	urate	cpd00300	EX_urate_e	EX_cpd00300_e	0
PM3B	Nitrogen	Alloxan	CE0074	cpd24434	EX_CE0074_e	EX_cpd24434_e	1
PM3B	Nitrogen	Allantoin	alltn	cpd01092	EX_alltn_e	EX_cpd01092_e	0
PM3B	Nitrogen	Parabanic acid	NA	cpd24435	NA	EX_cpd24435_e	0
PM3B	Nitrogen	D,L-a-Amino-N-Butyric acid	NA	cpd01523	NA	EX_cpd01523_e	0
PM3B	Nitrogen	g-Amino-N-Butyric acid	4abut	cpd00281	EX_4abut_e	EX_cpd00281_e	1
PM3B	Nitrogen	e-Amino-N-Caproic acid	6ax	cpd01588	EX_6ax_e	EX_cpd01588_e	0
PM3B	Nitrogen	D,L-a-Amino-Caprylic acid	NA	cpd24436	NA	EX_cpd24436_e	0
PM3B	Nitrogen	d-Amino-N-Valeric acid	5aptn	cpd00339	EX_5aptn_e	EX_cpd00339_e	1
PM3B	Nitrogen	a-Amino-N-Valeric acid	NA	cpd01258	NA	EX_cpd01258_e	0
PM3B	Nitrogen	Ala-Asp	ala_L_asp__L	cpd11593	EX_ala_L_asp__L_e	EX_cpd11593 _e	1
PM3B	Nitrogen	Ala-Gln	ala_gln	cpd11587	EX_ala_gln_e	EX_cpd11587_e	1
PM3B	Nitrogen	Ala-Glu	ala_L_glu__L	cpd15388	EX_ala_L_glu__L_e	EX_cpd15388 _e	1
PM3B	Nitrogen	Ala-Gly	L_alagly	cpd11585	EX_L_alagly_e	EX_cpd11585_e	1
PM3B	Nitrogen	Ala-His	ala_his	cpd11584	EX_ala_his_e	EX_cpd11584_e	1
PM3B	Nitrogen	Ala-Leu	ala_leu	cpd11583	EX_ala_leu_e	EX_cpd11583_e	1
PM3B	Nitrogen	Ala-Thr	ala_L_Thr__L	cpd23857	EX_ala_L_Thr__L_e	EX_cpd23857_e	1
PM3B	Nitrogen	Gly-Asn	gly_asn__L	cpd11581	EX_gly_asn__L_e	EX_cpd11581_e	1
PM3B	Nitrogen	Gly-Gln	gly_gln	cpd11580	EX_gly_gln_e	EX_cpd11580_e	1
PM3B	Nitrogen	Gly-Glu	gly_glu__L	cpd24418	EX_gly_glu__L_e	EX_cpd24418 _e	1
PM3B	Nitrogen	Gly-Met	gly_met	cpd11591	EX_gly_met_e	EX_cpd11591_e	1
PM3B	Nitrogen	Met-Ala	met_L_ala__L	cpd23854	EX_met_L_ala__L_e	EX_cpd23854_e	1
PM4A	Phosphorus	Phosphate	pi	cpd00009	EX_pi_e	EX_cpd00009_e	0
PM4A	Phosphorus	Pyrophosphate	ppi	cpd00012	EX_ppi_e	EX_cpd00012_e	0
PM4A	Phosphorus	Trimetaphosphate	tmp	cpd01622	EX_tmp_e	EX_cpd01622_e	0
PM4A	Phosphorus	Tripolyphosphate	pppi	cpd00421	EX_pppi_e	EX_cpd00421_e	0
PM4A	Phosphorus	Triethyl Phosphate	NA	cpd24437	NA	EX_cpd24437_e	0
PM4A	Phosphorus	Hypophosphite	NA	cpd03166	NA	EX_cpd03166_e	0
PM4A	Phosphorus	Adenosine 2`-Monophosphate	amp2p	cpd00700	EX_amp2p_e	EX_cpd00700_e	0
PM4A	Phosphorus	Adenosine 3`-Monophosphate	3amp	cpd00988	EX_3amp_e	EX_cpd00988_e	1
PM4A	Phosphorus	Adenosine 5`-Monophosphate	amp	cpd00018	EX_amp_e	EX_cpd00018_e	1
PM4A	Phosphorus	Adenosine 2`,3`-Cyclic Monophosphate	23camp	cpd01570	EX_23camp_e	EX_cpd01570_e	1
PM4A	Phosphorus	Adenosine 3`,5`-Cyclic Monophosphate	camp	cpd00446	EX_camp_e	EX_cpd00446_e	0
PM4A	Phosphorus	Thiophosphate	NA	cpd24444	NA	EX_cpd24444_e	0
PM4A	Phosphorus	Dithiophosphate	NA	cpd24445	NA	EX_cpd24445_e	0
PM4A	Phosphorus	D,L-a-Glycerol Phosphate	glyc1p	cpd16494	EX_glyc1p_e	EX_cpd16494_e	1
PM4A	Phosphorus	b-Glycerol Phosphate	glyc2p	cpd01908	EX_glyc2p_e	EX_cpd01908_e	1
PM4A	Phosphorus	Carbamyl Phosphate	cbp	cpd00146	EX_cbp_e	EX_cpd00146_e	1
PM4A	Phosphorus	D-2-Phospho-Glyceric acid	2pg	cpd00482	EX_2pg_e	EX_cpd00482_e	0
PM4A	Phosphorus	D-3-Phospho-Glyceric acid	3pg	cpd00169	EX_3pg_e	EX_cpd00169_e	0
PM4A	Phosphorus	Guanosine 2`-Monophosphate	NA	NA	NA	NA	0	Unknown IDs
PM4A	Phosphorus	Guanosine 3`-Monophosphate	3gmp	cpd03701	EX_3gmp_e	EX_cpd03701_e	1
PM4A	Phosphorus	Guanosine 5`-Monophosphate	gmp	cpd00126	EX_gmp_e	EX_cpd00126_e	1
PM4A	Phosphorus	Guanosine 2`,3`-Cyclic Monophosphate	23cgmp	cpd03702	EX_23cgmp_e	EX_cpd03702_e	0
PM4A	Phosphorus	Guanosine 3`,5`-Cyclic Monophosphate	35cgmp	cpd00697	EX_35cgmp_e	EX_cpd00697_e	0
PM4A	Phosphorus	Phosphoenol Pyruvate	pep	cpd00061	EX_pep_e	EX_cpd00061_e	0
PM4A	Phosphorus	Phospho-Glycolic acid	2pglyc	cpd00727	EX_2pglyc_e	EX_cpd00727_e	1
PM4A	Phosphorus	D-Glucose-1-Phosphate	g1p	cpd00089	EX_g1p_e	EX_cpd00089_e	1
PM4A	Phosphorus	D-Glucose-6-Phosphate	g6p	cpd00079	EX_g6p_e	EX_cpd00079_e	1
PM4A	Phosphorus	2-Deoxy-D-Glucose 6-Phosphate	2doxg6p	cpd03805	EX_2doxg6p_e	EX_cpd03805_e	0
PM4A	Phosphorus	D-Glucosamine-6-Phosphate	gam6p	cpd00288	EX_gam6p_e	EX_cpd00288_e	1
PM4A	Phosphorus	6-Phospho-Gluconic acid	6pgc	cpd00284	EX_6pgc_e	EX_cpd00284_e	0
PM4A	Phosphorus	Cytidine 2`-Monophosphate	NA	cpd01991	NA	EX_cpd01991_e	1
PM4A	Phosphorus	Cytidine 3`-Monophosphate	3cmp	cpd03454	EX_3cmp_e	EX_cpd03454_e	1
PM4A	Phosphorus	Cytidine 5`-Monophosphate	cmp	cpd00046	EX_cmp_e	EX_cpd00046_e	1
PM4A	Phosphorus	Cytidine 2`,3`-Cyclic Monophosphate	23ccmp	cpd01571	EX_23ccmp_e	EX_cpd01571_e	1
PM4A	Phosphorus	Cytidine 3`,5`-Cyclic Monophosphate	35ccmp	cpd00696	EX_35ccmp_e	EX_cpd00696_e	0
PM4A	Phosphorus	D-Mannose-1-Phosphate	man1p	cpd00485	EX_man1p_e	EX_cpd00485_e	1
PM4A	Phosphorus	D-Mannose-6-Phosphate	man6p	cpd00235	EX_man6p_e	EX_cpd00235_e	1
PM4A	Phosphorus	Cysteamine-S-Phosphate	NA	cpd24438	NA	EX_cpd24438_e	0
PM4A	Phosphorus	Phospho-L-Arginine	argp	cpd03535	EX_argp_e	EX_cpd03535_e	1
PM4A	Phosphorus	O-Phospho-D-Serine	pser__D	cpd01665	EX_pser__D_e	EX_cpd01665_e	0
PM4A	Phosphorus	O-Phospho-L-Serine	pser__L	cpd00738	EX_pser__L_e	EX_cpd00738_e	0
PM4A	Phosphorus	O-Phospho-L-Threonine	thrp	cpd08928	EX_thrp_e	EX_cpd08928_e	0
PM4A	Phosphorus	Uridine 2`-Monophosphate	NA	cpd01939	NA	EX_cpd01939_e	1
PM4A	Phosphorus	Uridine 3`-Monophosphate	3ump	cpd00989	EX_3ump_e	EX_cpd00989_e	1
PM4A	Phosphorus	Uridine 5`-Monophosphate	ump	cpd00091	EX_ump_e	EX_cpd00091_e	1
PM4A	Phosphorus	Uridine 2`,3`-Cyclic Monophosphate	23cump	cpd01572	EX_23cump_e	EX_cpd01572_e	1
PM4A	Phosphorus	Uridine 3`,5`-Cyclic Monophosphate	NA	NA	NA	NA	0	Unknown IDs
PM4A	Phosphorus	O-Phospho-D-Tyrosine	NA	cpd24440	NA	EX_cpd24440_e	1
PM4A	Phosphorus	O-Phospho-L-Tyrosine	tyrp	cpd03912	EX_tyrp_e	EX_cpd03912_e	1
PM4A	Phosphorus	Phosphocreatine	pcreat	cpd01550	EX_pcreat_e	EX_cpd01550_e	0
PM4A	Phosphorus	Phosphoryl Choline	cholp	cpd00457	EX_cholp_e	EX_cpd00457_e	0
PM4A	Phosphorus	O-Phosphoryl-Ethanolamine	ethamp	cpd00285	EX_ethamp_e	EX_cpd00285_e	0
PM4A	Phosphorus	Phosphono Acetic acid	ppac	cpd03385	EX_ppac_e	EX_cpd03385_e	0
PM4A	Phosphorus	2-Aminoethyl Phosphonic acid	2ameph	cpd02233	EX_2ameph_e	EX_cpd02233_e	0
PM4A	Phosphorus	Methylene Diphosphonic acid	NA	cpd24441	NA	EX_cpd24441_e	0
PM4A	Phosphorus	Thymidine 3`-Monophosphate	NA	cpd24442	NA	EX_cpd24442_e	1
PM4A	Phosphorus	Thymidine 5`-Monophosphate	dtmp	cpd00298	EX_dtmp_e	EX_cpd00298_e	1
PM4A	Phosphorus	Inositol Hexaphosphate	mi1p__D	cpd00867	EX_mi1p__D_e	EX_cpd00867_e	0
PM4A	Phosphorus	Thymidine 3`,5`-Cyclic Monophosphate	NA	cpd24443	NA	EX_cpd24443_e	0
PM4A	Sulfur	Sulfate	so4	cpd00048	EX_so4_e	EX_cpd00048_e	0
PM4A	Sulfur	Thiosulfate	tsul	cpd00268	EX_tsul_e	EX_cpd00268_e	0
PM4A	Sulfur	Tetrathionate	tet	cpd01414	EX_tet_e	EX_cpd01414_e	0
PM4A	Sulfur	Thiophosphate	NA	cpd24444	NA	EX_cpd24444_e	0
PM4A	Sulfur	Dithiophosphate	NA	cpd24445	NA	EX_cpd24445_e	0
PM4A	Sulfur	L-Cysteine	cys__L	cpd00084	EX_cys__L_e	EX_cpd00084_e	0
PM4A	Sulfur	D-Cysteine	cys__D	cpd00587	EX_cys__D_e	EX_cpd00587_e	0
PM4A	Sulfur	Cys-Gly	cgly	cpd01017	EX_cgly_e	EX_cpd01017_e	0
PM4A	Sulfur	L-Cysteic acid	Lcyst	cpd00395	EX_Lcyst_e	EX_cpd00395_e	0
PM4A	Sulfur	Cysteamine	cysam	cpd01160	EX_cysam_e	EX_cpd01160_e	0
PM4A	Sulfur	L-Cysteine Sulfinic acid	3sala	cpd00467	EX_3sala_e	EX_cpd00467_e	0
PM4A	Sulfur	N-Acetyl-L-Cysteine	CE1310	cpd04181	EX_CE1310_e	EX_cpd04181_e	0
PM4A	Sulfur	S-Methyl-L-Cysteine	NA	cpd12392	NA	EX_cpd12392_e	0
PM4A	Sulfur	Cystathionine	cyst__L	cpd00424	EX_cyst__L_e	EX_cpd00424_e	0
PM4A	Sulfur	Lanthionine	lanth	cpd11577	EX_lanth_e	EX_cpd11577_e	0
PM4A	Sulfur	Glutathione	gthox	cpd00111	EX_gthox_e	EX_cpd00111_e	0
PM4A	Sulfur	D,L-Ethionine	NA	cpd08093	NA	EX_cpd08093_e	0
PM4A	Sulfur	L-Methionine	met__L	cpd00060	EX_met__L_e	EX_cpd00060_e	0
PM4A	Sulfur	D-Methionine	met__D	cpd00637	EX_met__D_e	EX_cpd00637_e	1
PM4A	Sulfur	Gly-Met	gly_met	cpd11591	EX_gly_met_e	EX_cpd11591_e	1
PM4A	Sulfur	N-Acetyl-D,L-Methionine	acmet	cpd24446	EX_acmet_e	EX_cpd24446_e	0
PM4A	Sulfur	L-Methionine Sulfoxide	metsox_S__L	cpd01914	EX_metsox_S__L_e	EX_cpd01914_e	0
PM4A	Sulfur	L-Methionine Sulfone	NA	cpd26353	NA	EX_cpd26353_e	0
PM4A	Sulfur	L-Djenkolic acid	djenk	cpd05190	EX_djenk_e	EX_cpd05190_e	0
PM4A	Sulfur	Thiourea	NA	cpd10114	NA	EX_cpd10114_e	0
PM4A	Sulfur	1-Thio-b-D-Glucose	NA	cpd24448	NA	EX_cpd24448_e	0
PM4A	Sulfur	D,L-Lipoamide	lpam	cpd00213	EX_lpam_e	EX_cpd00213_e	0
PM4A	Sulfur	Taurocholic acid	tchola	cpd03047	EX_tchola_e	EX_cpd03047_e	0
PM4A	Sulfur	Taurine	taur	cpd00210	EX_taur_e	EX_cpd00210_e	0
PM4A	Sulfur	Hypotaurine	hyptaur	cpd00406	EX_hyptaur_e	EX_cpd00406_e	0
PM4A	Sulfur	p-Aminobenzene Sulfonic acid	NA	cpd03776	NA	EX_cpd03776_e	0
PM4A	Sulfur	Butane Sulfonic acid	butso3	cpd11596	EX_butso3_e	EX_cpd11596_e	0
PM4A	Sulfur	2-Hydroxyethane Sulfonic acid	isetac	cpd03048	EX_isetac_e	EX_cpd03048_e	0
PM4A	Sulfur	Methane Sulfonic acid	mso3	cpd08023	EX_mso3_e	EX_cpd08023_e	0
PM4A	Sulfur	Tetramethylene Sulfone	NA	cpd24449	NA	EX_cpd24449_e	0

## Sheet: 3.BIOLOG_substrates
Chemical	BiGG_ID	SEED_ID	BiGG_exchange	SEED_exchange	Notes
1,2-Propanediol	12ppd__S	cpd19024	EX_12ppd__S_e	EX_cpd19024_e
1-Thio-b-D-Glucose	NA	cpd24448	NA	EX_cpd24448_e
2,3-Butanediol	btd_RR	cpd01947	EX_btd_RR_e	EX_cpd01947_e
2,3-Butanedione	diact	cpd00551	EX_diact_e	EX_cpd00551_e
2`-Deoxyadenosine	dad_2	cpd00438	EX_dad_2_e	EX_cpd00438_e
2-Aminoethanol	etha	cpd00162	EX_etha_e	EX_cpd00162_e
2-Aminoethyl Phosphonic acid	2ameph	cpd02233	EX_2ameph_e	EX_cpd02233_e
2-Deoxy-D-Glucose 6-Phosphate	2doxg6p	cpd03805	EX_2doxg6p_e	EX_cpd03805_e
2-Deoxy-D-Ribose	drib	cpd01242	EX_drib_e	EX_cpd01242_e
2-Hydroxybenzoic acid	salc	cpd00599	EX_salc_e	EX_cpd00599_e
2-Hydroxyethane Sulfonic acid	isetac	cpd03048	EX_isetac_e	EX_cpd03048_e
3-Hydroxy-2-butanone	R_actn	cpd00361	EX_R_actn_e	EX_cpd00361_e
3-Methylglucose	NA	NA	NA	NA	Unknown IDs
3-O-b-D-Galactopyranosyl-D-Arabinose	NA	cpd24453	NA	EX_cpd24453 _e
4-Hydroxybenzoic acid	4hbz	cpd00136	EX_4hbz_e	EX_cpd00136_e
5-Keto-D-Gluconic acid	5dglcn	cpd00781	EX_5dglcn_e	EX_cpd00781_e
6-Phospho-Gluconic acid	6pgc	cpd00284	EX_6pgc_e	EX_cpd00284_e
a-Amino-N-Valeric acid	NA	cpd01258	NA	EX_cpd01258_e
Acetamide	ad	cpd03734	EX_ad_e	EX_cpd03734_e
Acetic acid	ac	cpd00029	EX_ac_e	EX_cpd00029_e
Acetoacetic acid	acac	cpd00142	EX_acac_e	EX_cpd00142_e
a-Cyclodextrin	NA	cpd24451	NA	EX_cpd24451_e
Adenine	ade	cpd00128	EX_ade_e	EX_cpd00128_e
Adenosine	adn	cpd00182	EX_adn_e	EX_cpd00182_e
Adenosine 2`,3`-Cyclic Monophosphate	23camp	cpd01570	EX_23camp_e	EX_cpd01570_e
Adenosine 2`-Monophosphate	amp2p	cpd00700	EX_amp2p_e	EX_cpd00700_e
Adenosine 3`,5`-Cyclic Monophosphate	camp	cpd00446	EX_camp_e	EX_cpd00446_e
Adenosine 3`-Monophosphate	3amp	cpd00988	EX_3amp_e	EX_cpd00988_e
Adenosine 5`-Monophosphate	amp	cpd00018	EX_amp_e	EX_cpd00018_e
a-D-Glucose	glc__aD	NA	EX_glc__aD_e	NA
a-D-Lactose	NA	NA	NA	NA	Unknown IDs
Adonitol	rbt	cpd00366	EX_rbt_e	EX_cpd00366_e
Agmatine	agm	cpd00152	EX_agm_e	EX_cpd00152_e
a-Hydroxybutyric acid	2hb	cpd03561	EX_2hb_e	EX_cpd03561_e
a-Hydroxyglutaric acid-g-Lactone	NA	NA	NA	NA	Unknown IDs
a-Ketobutyric acid	2obut	cpd00094	EX_2obut_e	EX_cpd00094_e
a-Ketoglutaric acid	akg	cpd00024	EX_akg_e	EX_cpd00024_e
a-Keto-Valeric acid	NA	NA	NA	NA	Unknown IDs
Ala-Asp	ala_L_asp__L	cpd11593	EX_ala_L_asp__L_e	EX_cpd11593 _e
Ala-Gln	ala_gln	cpd11587	EX_ala_gln_e	EX_cpd11587_e
Ala-Glu	ala_L_glu__L	cpd15388	EX_ala_L_glu__L_e	EX_cpd15388 _e
Ala-Gly	L_alagly	cpd11585	EX_L_alagly_e	EX_cpd11585_e
Ala-His	ala_his	cpd11584	EX_ala_his_e	EX_cpd11584_e
Ala-Leu	ala_leu	cpd11583	EX_ala_leu_e	EX_cpd11583_e
Ala-Thr	ala_L_Thr__L	cpd23857	EX_ala_L_Thr__L_e	EX_cpd23857_e
Allantoin	alltn	cpd01092	EX_alltn_e	EX_cpd01092_e
Alloxan	CE0074	cpd24434	EX_CE0074_e	EX_cpd24434_e
a-Methyl-D-Galactoside	NA	cpd02274	NA	EX_cpd02274_e
a-Methyl-D-Glucoside	amdglc	cpd15584	EX_amdglc_e	EX_cpd15584_e
a-Methyl-D-Mannoside	NA	cpd24424	NA	EX_cpd24424_e
Ammonia	nh3	cpd00013	EX_nh3_e	EX_cpd00013_e
Amygdalin	NA	cpd01356	NA	EX_cpd01356_e
Arbutin	arbt	cpd03696	EX_arbt_e	EX_cpd03696_e
b-Cyclodextrin	NA	cpd09394	NA	EX_cpd09394_e
b-D-Allose	all__D	cpd01055	EX_all__D_e	EX_cpd01055_e
b-Glycerol Phosphate	glyc2p	cpd01908	EX_glyc2p_e	EX_cpd01908_e
b-Hydroxybutyric acid	bhb	cpd00797	EX_bhb_e	EX_cpd00797_e
Biuret	NA	cpd03963	NA	EX_cpd03963_e
b-Methyl-D-Galactoside	gal_bD	cpd00709	EX_gal_bD_e	EX_cpd00709_e
b-Methyl-D-Glucoside	NA	cpd11603	NA	EX_cpd11603_e
b-Methyl-D-Glucuronic acid	metglcur	NA	EX_metglcur_e	NA
b-Methyl-D-Xyloside	NA	cpd24425	NA	EX_cpd24425_e
b-Phenylethylamine	peamn	cpd03161	EX_peamn_e	EX_cpd03161_e
Bromosuccinic acid	NA	cpd23859	NA	EX_cpd23859_e
Butane Sulfonic acid	butso3	cpd11596	EX_butso3_e	EX_cpd11596_e
Butyric acid	but	cpd00211	EX_but_e	EX_cpd00211_e
Capric acid	dca	cpd01107	EX_dca_e	EX_cpd01107_e
Caproic acid	caproic	cpd28989	EX_caproic_e	EX_cpd28989 _e
Carbamyl Phosphate	cbp	cpd00146	EX_cbp_e	EX_cpd00146_e
Chondroitin Sulfate C	cs_c	cpd11717	EX_cs_c_e	EX_cpd11717 _e
Citraconic acid	citac	cpd01502	EX_citac_e	EX_cpd01502_e
Citramalic acid	citm	cpd00607	EX_citm_e	EX_cpd00607_e
Citric acid	cit	cpd00137	EX_cit_e	EX_cpd00137_e
Cys-Gly	cgly	cpd01017	EX_cgly_e	EX_cpd01017_e
Cystathionine	cyst__L	cpd00424	EX_cyst__L_e	EX_cpd00424_e
Cysteamine	cysam	cpd01160	EX_cysam_e	EX_cpd01160_e
Cysteamine-S-Phosphate	NA	cpd24438	NA	EX_cpd24438_e
Cytidine	cytd	cpd00367	EX_cytd_e	EX_cpd00367_e
Cytidine 2`,3`-Cyclic Monophosphate	23ccmp	cpd01571	EX_23ccmp_e	EX_cpd01571_e
Cytidine 2`-Monophosphate	NA	cpd01991	NA	EX_cpd01991_e
Cytidine 3`,5`-Cyclic Monophosphate	35ccmp	cpd00696	EX_35ccmp_e	EX_cpd00696_e
Cytidine 3`-Monophosphate	3cmp	cpd03454	EX_3cmp_e	EX_cpd03454_e
Cytidine 5`-Monophosphate	cmp	cpd00046	EX_cmp_e	EX_cpd00046_e
Cytosine	csn	cpd00307	EX_csn_e	EX_cpd00307_e
D,L-a-Amino-Caprylic acid	NA	cpd24436	NA	EX_cpd24436_e
D,L-a-Amino-N-Butyric acid	NA	cpd01523	NA	EX_cpd01523_e
D,L-a-Glycerol Phosphate	glyc1p	cpd16494	EX_glyc1p_e	EX_cpd16494_e
D,L-Carnitine	crn	cpd00266	EX_crn_e	EX_cpd00266_e
D,L-Ethionine	NA	cpd08093	NA	EX_cpd08093_e
D,L-Lactamide	NA	cpd23860	NA	EX_cpd23860_e
D,L-Lipoamide	lpam	cpd00213	EX_lpam_e	EX_cpd00213_e
D,L-Malic acid	mal__L	cpd00130	EX_mal__L_e	EX_cpd00130_e
D,L-Octopamine	NA	cpd02599	NA	EX_cpd02599_e
D-2-Phospho-Glyceric acid	2pg	cpd00482	EX_2pg_e	EX_cpd00482_e
D-3-Phospho-Glyceric acid	3pg	cpd00169	EX_3pg_e	EX_cpd00169_e
D-Alanine	ala__D	cpd00117	EX_ala__D_e	EX_cpd00117_e
d-Amino Valeric acid	NA	NA	NA	NA	Unknown IDs
d-Amino-N-Valeric acid	5aptn	cpd00339	EX_5aptn_e	EX_cpd00339_e
D-Arabinose	arab__D	cpd00185	EX_arab__D_e	EX_cpd00185_e
D-Arabitol	abt__D	cpd01307	EX_abt__D_e	EX_cpd01307_e
D-Asparagine	asn__D	cpd01308	EX_asn__D_e	EX_cpd01308 _e
D-Aspartic acid	asp__D	cpd00320	EX_asp__D_e	EX_cpd00320_e
D-Cellobiose	cellb	cpd00158	EX_cellb_e	EX_cpd00158_e
D-Cysteine	cys__D	cpd00587	EX_cys__D_e	EX_cpd00587_e
Dextrin	dextrin	cpd11594	EX_dextrin_e	EX_cpd11594_e
D-Fructose	fru	cpd00082	EX_fru_e	EX_cpd00082_e
D-Fructose-6-Phosphate	f6p	cpd00072	EX_f6p_e	EX_cpd00072 _e
D-Fucose	NA	cpd00750	NA	EX_cpd00750_e
D-Galactonic acid-g-Lactone	gullac	cpd00765	EX_gullac_e	EX_cpd00765_e
D-Galactosamine	galam	NA	EX_galam_e	NA
D-Galactose	gal	cpd00108	EX_gal_e	EX_cpd00108_e
D-Galacturonic acid	galur	cpd00280	EX_galur_e	EX_cpd00280_e
D-Gluconic acid	glcn	cpd00222	EX_glcn_e	EX_cpd00222_e
D-Glucosamine	gam	cpd00276	EX_gam_e	EX_cpd00276_e
D-Glucosamine-6-Phosphate	gam6p	cpd00288	EX_gam6p_e	EX_cpd00288_e
D-Glucosaminic acid	NA	cpd02351	NA	EX_cpd02351_e
D-Glucose-1-Phosphate	g1p	cpd00089	EX_g1p_e	EX_cpd00089_e
D-Glucose-6-Phosphate	g6p	cpd00079	EX_g6p_e	EX_cpd00079_e
D-Glucuronic acid	glcur	cpd00164	EX_glcur_e	EX_cpd00164_e
D-Glutamic acid	glu__D	cpd00186	EX_glu__D_e	EX_cpd00186_e
Dihydroxyacetone	dha	cpd00157	EX_dha_e	EX_cpd00157_e
Dithiophosphate	NA	cpd24445	NA	EX_cpd24445_e
D-Lactic acid Methyl Ester	NA	cpd24428	NA	EX_cpd24428_e
D-Lactitol	NA	cpd09457	NA	EX_cpd09457_e
D-Lysine	lys__D	cpd00549	EX_lys__D_e	EX_cpd00549_e
D-Malic acid	mal__D	cpd00386	EX_mal__D_e	EX_cpd00386_e
D-Mannitol	mnl	cpd00314	EX_mnl_e	EX_cpd00314_e
D-Mannosamine	NA	cpd02241	NA	EX_cpd02241_e
D-Mannose	man	cpd00138	EX_man_e	EX_cpd00138_e
D-Mannose-1-Phosphate	man1p	cpd00485	EX_man1p_e	EX_cpd00485_e
D-Mannose-6-Phosphate	man6p	cpd00235	EX_man6p_e	EX_cpd00235_e
D-Melezitose	NA	cpd05161	NA	EX_cpd05161_e
D-Melibiose	melib	cpd03198	EX_melib_e	EX_cpd03198_e
D-Methionine	met__D	cpd00637	EX_met__D_e	EX_cpd00637_e
D-Psicose	NA	cpd03884	NA	EX_cpd03884_e
D-Raffinose	raffin	cpd00382	EX_raffin_e	EX_cpd00382_e
D-Ribono-1,4-Lactone	NA	cpd23861	NA	EX_cpd23861_e
D-Ribose	rib__D	cpd00105	EX_rib__D_e	EX_cpd00105_e
D-Saccharic acid	glcr	cpd00571	EX_glcr_e	EX_cpd00571_e
D-Serine	ser__D	cpd00550	EX_ser__D_e	EX_cpd00550_e
D-Sorbitol	sbt__D	cpd00588	EX_sbt__D_e	EX_cpd00588_e
D-Tagatose	tag__D	cpd00589	EX_tag__D_e	EX_cpd00589_e
D-Tartaric acid	tartr__D	cpd19018	EX_tartr__D_e	EX_cpd19018_e
D-Threonine	NA	cpd00611	NA	EX_cpd00611_e
D-Trehalose	tre	cpd00794	EX_tre_e	EX_cpd00794_e
Dulcitol	galt	cpd01171	EX_galt_e	EX_cpd01171_e
D-Valine	val__D	cpd03840	EX_val__D_e	EX_cpd03840_e
D-Xylose	xyl__D	cpd00154	EX_xyl__D_e	EX_cpd00154_e
e-Amino-N-Caproic acid	6ax	cpd01588	EX_6ax_e	EX_cpd01588_e
Ethanolamine	etha	cpd00162	EX_etha_e	EX_cpd00162_e
Ethylamine	NA	cpd00591	NA	EX_cpd00591_e
Ethylenediamine	NA	cpd24433	NA	EX_cpd24433_e
Formamide	frmd	cpd00378	EX_frmd_e	EX_cpd00378_e
Formic acid	for	cpd00047	EX_for_e	EX_cpd00047_e
Fumaric acid	fum	cpd00106	EX_fum_e	EX_cpd00106_e
g-Amino-N-Butyric acid	4abut	cpd00281	EX_4abut_e	EX_cpd00281_e
g-Cyclodextrin	NA	cpd24452	NA	EX_cpd24452_e
Gelatin	NA	cpd11879	NA	EX_cpd11879_e
Gentiobiose	NA	cpd05158	NA	EX_cpd05158_e
g-Hydroxybutyric acid	ghb	cpd00728	EX_ghb_e	EX_cpd00728_e
Glucuronamide	NA	cpd26269	NA	EX_cpd26269_e
Glutathione	gthox	cpd00111	EX_gthox_e	EX_cpd00111_e
Gly-Asn	gly_asn__L	cpd11581	EX_gly_asn__L_e	EX_cpd11581_e
Gly-Asp	gly_asp__L	cpd11589	EX_gly_asp__L_e	EX_cpd11589_e
Glycerol	glyc	cpd00100	EX_glyc_e	EX_cpd00100_e
Glycine	gly	cpd00033	EX_gly_e	EX_cpd00033_e
Glycogen	glycogen	cpd00155	EX_glycogen_e	EX_cpd00155_e
Glycolic acid	glyclt	cpd00139	EX_glyclt_e	EX_cpd00139_e
Gly-Gln	gly_gln	cpd11580	EX_gly_gln_e	EX_cpd11580_e
Gly-Glu	gly_glu__L	cpd24418	EX_gly_glu__L_e	EX_cpd24418 _e
Gly-Met	gly_met	cpd11591	EX_gly_met_e	EX_cpd11591_e
Glyoxylic acid	glx	cpd00040	EX_glx_e	EX_cpd00040_e
Gly-Pro	gly_pro__L	cpd11588	EX_gly_pro__L_e	EX_cpd11588_e
Guanine	gua	cpd00207	EX_gua_e	EX_cpd00207_e
Guanosine	gsn	cpd00311	EX_gsn_e	EX_cpd00311_e
Guanosine 2`,3`-Cyclic Monophosphate	23cgmp	cpd03702	EX_23cgmp_e	EX_cpd03702_e
Guanosine 2`-Monophosphate	NA	NA	NA	NA	Unknown IDs
Guanosine 3`,5`-Cyclic Monophosphate	35cgmp	cpd00697	EX_35cgmp_e	EX_cpd00697_e
Guanosine 3`-Monophosphate	3gmp	cpd03701	EX_3gmp_e	EX_cpd03701_e
Guanosine 5`-Monophosphate	gmp	cpd00126	EX_gmp_e	EX_cpd00126_e
Histamine	hista	cpd00312	EX_hista_e	EX_cpd00312_e
Hydroxylamine	ham	cpd00165	EX_ham_e	EX_cpd00165_e
Hydroxy-L-Proline	4hpro_LT	cpd00851	EX_4hpro_LT_e	EX_cpd00851_e
Hypophosphite	NA	cpd03166	NA	EX_cpd03166_e
Hypotaurine	hyptaur	cpd00406	EX_hyptaur_e	EX_cpd00406_e
i-Erythritol	NA	cpd00392	NA	EX_cpd00392_e
Inosine	ins	cpd00246	EX_ins_e	EX_cpd00246_e
Inositol Hexaphosphate	mi1p__D	cpd00867	EX_mi1p__D_e	EX_cpd00867_e
Inulin	NA	cpd11602	NA	EX_cpd11602_e
Itaconic acid	itacon	cpd00380	EX_itacon_e	EX_cpd00380_e
Lactulose	NA	cpd04349	NA	EX_cpd04349_e
L-Alaninamide	NA	cpd23030	NA	EX_cpd23030_e
L-Alanine	ala__L	cpd00035	EX_ala__L_e	EX_cpd00035_e
Laminarin	NA	cpd11748	NA	EX_cpd11748_e
Lanthionine	lanth	cpd11577	EX_lanth_e	EX_cpd11577_e
L-Arabinose	arab__L	cpd00224	EX_arab__L_e	EX_cpd00224_e
L-Arabitol	abt__L	cpd00417	EX_abt__L_e	EX_cpd00417_e
L-Arginine	arg__L	cpd00051	EX_arg__L_e	EX_cpd00051_e
L-Asparagine	asn__L	cpd00132	EX_asn__L_e	EX_cpd00132_e
L-Aspartic acid	asp__L	cpd00041	EX_asp__L_e	EX_cpd00041_e
L-Citrulline	citr__L	cpd00274	EX_citr__L_e	EX_cpd00274_e
L-Cysteic acid	Lcyst	cpd00395	EX_Lcyst_e	EX_cpd00395_e
L-Cysteine	cys__L	cpd00084	EX_cys__L_e	EX_cpd00084_e
L-Cysteine Sulfinic acid	3sala	cpd00467	EX_3sala_e	EX_cpd00467_e
L-Djenkolic acid	djenk	cpd05190	EX_djenk_e	EX_cpd05190_e
L-Fucose	fuc__L	cpd00751	EX_fuc__L_e	EX_cpd00751_e
L-Galactonic acid-g-Lactone	NA	cpd00820	NA	EX_cpd00820_e
L-Glucose	NA	cpd24421	NA	EX_cpd24421_e
L-Glutamic acid	glu__L	cpd00023	EX_glu__L_e	EX_cpd00023_e
L-Glutamine	gln__L	cpd00053	EX_gln__L_e	EX_cpd00053_e
L-Histidine	his__L	cpd00119	EX_his__L_e	EX_cpd00119_e
L-Homoserine	hom__L	cpd00227	EX_hom__L_e	EX_cpd00227_e
L-Isoleucine	ile__L	cpd00322	EX_ile__L_e	EX_cpd00322_e
L-Lactic acid	lac__L	cpd00159	EX_lac__L_e	EX_cpd00159_e
L-Leucine	leu__L	cpd00107	EX_leu__L_e	EX_cpd00107_e
L-Lysine	lys__L	cpd00039	EX_lys__L_e	EX_cpd00039_e
L-Lyxose	lyx__L	cpd01067	EX_lyx__L_e	EX_cpd01067_e
L-Malic acid	mal__L	cpd00130	EX_mal__L_e	EX_cpd00130_e
L-Methionine	met__L	cpd00060	EX_met__L_e	EX_cpd00060_e
L-Methionine Sulfone	NA	cpd26353	NA	EX_cpd26353_e
L-Methionine Sulfoxide	metsox_S__L	cpd01914	EX_metsox_S__L_e	EX_cpd01914_e
L-Ornithine	orn	cpd00064	EX_orn_e	EX_cpd00064 _e
L-Phenylalanine	phe__L	cpd00066	EX_phe__L_e	EX_cpd00066_e
L-Proline	pro__L	cpd00129	EX_pro__L_e	EX_cpd00129_e
L-Pyroglutamic acid	5oxpro	cpd01293	EX_5oxpro_e	EX_cpd01293_e
L-Rhamnose	rmn	cpd00396	EX_rmn_e	EX_cpd00396_e
L-Serine	ser__L	cpd00054	EX_ser__L_e	EX_cpd00054_e
L-Sorbose	srb__L	cpd00212	EX_srb__L_e	EX_cpd00212_e
L-Tartaric acid	tartr__L	cpd00666	EX_tartr__L_e	EX_cpd00666 _e
L-Threonine	thr__L	cpd00161	EX_thr__L_e	EX_cpd00161_e
L-Tryptophan	trp__L	cpd00065	EX_trp__L_e	EX_cpd00065_e
L-Tyrosine	tyr__L	cpd00069	EX_tyr__L_e	EX_cpd00069_e
L-Valine	val__L	cpd00156	EX_val__L_e	EX_cpd00156_e
Malonic acid	malon	cpd00308	EX_malon_e	EX_cpd00308_e
Maltitol	NA	cpd37280	NA	EX_cpd37280 _e
Maltose	malt	cpd00179	EX_malt_e	EX_cpd00179_e
Maltotriose	malttr	cpd01262	EX_malttr_e	EX_cpd01262_e
Mannan	mannan	cpd11685	EX_mannan_e	EX_cpd11685_e
Melibionic acid	NA	cpd24454	NA	EX_cpd24454_e
Met-Ala	met_L_ala__L	cpd23854	EX_met_L_ala__L_e	EX_cpd23854_e
Methane Sulfonic acid	mso3	cpd08023	EX_mso3_e	EX_cpd08023_e
Methylamine	mma	cpd00187	EX_mma_e	EX_cpd00187_e
Methylene Diphosphonic acid	NA	cpd24441	NA	EX_cpd24441_e
Methylpyruvate	NA	cpd24420	NA	EX_cpd24420_e
m-Hydroxyphenyl Acetic acid	3hoxpac	cpd03320	EX_3hoxpac_e	EX_cpd03320 _e
m-Inositol	inost	cpd00121	EX_inost_e	EX_cpd00121_e
Mono-Methylsuccinate	NA	NA	NA	NA	Unknown IDs
m-Tartaric acid	tartr__M	cpd00432	EX_tartr__M_e	EX_cpd00432_e
Mucic acid	galct__D	cpd00652	EX_galct__D_e	EX_cpd00652_e
N-Acetyl-D,L-Methionine	acmet	cpd24446	EX_acmet_e	EX_cpd24446_e
N-Acetyl-D-Galactosamine	acgal	cpd00832	EX_acgal_e	EX_cpd00832_e
N-Acetyl-D-Glucosamine	acgam	cpd00122	EX_acgam_e	EX_cpd00122_e
N-Acetyl-D-Glucosaminitol	NA	cpd24427	NA	EX_cpd24427_e
N-Acetyl-D-Mannosamine	acmana	cpd00492	EX_acmana_e	EX_cpd00492_e
N-Acetyl-L-Cysteine	CE1310	cpd04181	EX_CE1310_e	EX_cpd04181_e
N-Acetyl-L-Glutamic acid	acglu	cpd00477	EX_acglu_e	EX_cpd00477_e
N-Acetyl-Neuraminic acid	acnam	cpd00232	EX_acnam_e	EX_cpd00232_e
N-Amylamine	NA	cpd24432	NA	EX_cpd24432_e
N-Butylamine	NA	cpd19969	NA	EX_cpd19969_e
Nitrate	no3	cpd00209	EX_no3_e	EX_cpd00209_e
Nitrite	no2	cpd00075	EX_no2_e	EX_cpd00075_e
N-Phthaloyl-L-Glutamic acid	NA	cpd24431	NA	EX_cpd24431_e
O-Phospho-D-Serine	pser__D	cpd01665	EX_pser__D_e	EX_cpd01665_e
O-Phospho-D-Tyrosine	NA	cpd24440	NA	EX_cpd24440_e
O-Phospho-L-Serine	pser__L	cpd00738	EX_pser__L_e	EX_cpd00738_e
O-Phospho-L-Threonine	thrp	cpd08928	EX_thrp_e	EX_cpd08928_e
O-Phospho-L-Tyrosine	tyrp	cpd03912	EX_tyrp_e	EX_cpd03912_e
O-Phosphoryl-Ethanolamine	ethamp	cpd00285	EX_ethamp_e	EX_cpd00285_e
Oxalic acid	oxa	cpd00180	EX_oxa_e	EX_cpd00180_e
Oxalomalic acid	NA	cpd01363	NA	EX_cpd01363_e
Palatinose	pala	cpd01200	EX_pala_e	EX_cpd01200_e
p-Aminobenzene Sulfonic acid	NA	cpd03776	NA	EX_cpd03776_e
Parabanic acid	NA	cpd24435	NA	EX_cpd24435_e
Pectin	pectin	cpd11601	EX_pectin_e	EX_cpd11601_e
Phenylethylamine	peamn	cpd03161	EX_peamn_e	EX_cpd03161_e
Phosphate	pi	cpd00009	EX_pi_e	EX_cpd00009_e
Phosphocreatine	pcreat	cpd01550	EX_pcreat_e	EX_cpd01550_e
Phosphoenol Pyruvate	pep	cpd00061	EX_pep_e	EX_cpd00061_e
Phospho-Glycolic acid	2pglyc	cpd00727	EX_2pglyc_e	EX_cpd00727_e
Phospho-L-Arginine	argp	cpd03535	EX_argp_e	EX_cpd03535_e
Phosphono Acetic acid	ppac	cpd03385	EX_ppac_e	EX_cpd03385_e
Phosphoryl Choline	cholp	cpd00457	EX_cholp_e	EX_cpd00457_e
p-Hydroxyphenyl Acetic acid	4hoxpac	cpd00489	EX_4hoxpac_e	EX_cpd00489_e
Propionic acid	ppa	cpd00141	EX_ppa_e	EX_cpd00141_e
Putrescine	ptrc	cpd00118	EX_ptrc_e	EX_cpd00118_e
Pyrophosphate	ppi	cpd00012	EX_ppi_e	EX_cpd00012_e
Pyruvic acid	pyr	cpd00020	EX_pyr_e	EX_cpd00020_e
Quinic acid	quin	cpd00248	EX_quin_e	EX_cpd00248_e
Salicin	salcn	cpd01030	EX_salcn_e	EX_cpd01030_e
Sebacic acid	sebacid	cpd05192	EX_sebacid_e	EX_cpd05192 _e
sec-Butylamine	NA	cpd24429	NA	EX_cpd24429_e
Sedoheptulosan	NA	cpd24426	NA	EX_cpd24426_e
S-Methyl-L-Cysteine	NA	cpd12392	NA	EX_cpd12392_e
Sorbic acid	NA	cpd16648	NA	EX_cpd16648_e
Stachyose	stys	cpd01133	EX_stys_e	EX_cpd01133_e
Succinamic acid	NA	cpd25518	NA	EX_cpd25518_e
Succinate	succ	cpd00036	EX_succ_e	EX_cpd00036_e
Succinic acid	succ	cpd00036	EX_succ_e	EX_cpd00036_e
Sucrose	sucr	cpd00076	EX_sucr_e	EX_cpd00076_e
Sulfate	so4	cpd00048	EX_so4_e	EX_cpd00048_e
Taurine	taur	cpd00210	EX_taur_e	EX_cpd00210_e
Taurocholic acid	tchola	cpd03047	EX_tchola_e	EX_cpd03047_e
Tetramethylene Sulfone	NA	cpd24449	NA	EX_cpd24449_e
Tetrathionate	tet	cpd01414	EX_tet_e	EX_cpd01414_e
Thiophosphate	NA	cpd24444	NA	EX_cpd24444_e
Thiosulfate	tsul	cpd00268	EX_tsul_e	EX_cpd00268_e
Thiourea	NA	cpd10114	NA	EX_cpd10114_e
Thymidine	thymd	cpd00184	EX_thymd_e	EX_cpd00184_e
Thymidine 3`,5`-Cyclic Monophosphate	NA	cpd24443	NA	EX_cpd24443_e
Thymidine 3`-Monophosphate	NA	cpd24442	NA	EX_cpd24442_e
Thymidine 5`-Monophosphate	dtmp	cpd00298	EX_dtmp_e	EX_cpd00298_e
Thymine	thym	cpd00151	EX_thym_e	EX_cpd00151_e
Tricarballylic acid	tcb	cpd16654	EX_tcb_e	EX_cpd16654_e
Triethyl Phosphate	NA	cpd24437	NA	EX_cpd24437_e
Trimetaphosphate	tmp	cpd01622	EX_tmp_e	EX_cpd01622_e
Tripolyphosphate	pppi	cpd00421	EX_pppi_e	EX_cpd00421_e
Turanose	tur	cpd20885	EX_tur_e	EX_cpd20885_e
Tween 20	NA	cpd13391	NA	EX_cpd13391_e
Tween 40	NA	cpd24417	NA	EX_cpd24417_e
Tween 80	NA	cpd13392	NA	EX_cpd13392_e
Tyramine	tym	cpd00374	EX_tym_e	EX_cpd00374_e
Uracil	ura	cpd00092	EX_ura_e	EX_cpd00092_e
Urea	urea	cpd00073	EX_urea_e	EX_cpd00073_e
Uric acid	urate	cpd00300	EX_urate_e	EX_cpd00300_e
Uridine	uri	cpd00249	EX_uri_e	EX_cpd00249_e
Uridine 2`,3`-Cyclic Monophosphate	23cump	cpd01572	EX_23cump_e	EX_cpd01572_e
Uridine 2`-Monophosphate	NA	cpd01939	NA	EX_cpd01939_e
Uridine 3`,5`-Cyclic Monophosphate	NA	NA	NA	NA	Unknown IDs
Uridine 3`-Monophosphate	3ump	cpd00989	EX_3ump_e	EX_cpd00989_e
Uridine 5`-Monophosphate	ump	cpd00091	EX_ump_e	EX_cpd00091_e
Xanthine	xan	cpd00309	EX_xan_e	EX_cpd00309_e
Xanthosine	xtsn	cpd01217	EX_xtsn_e	EX_cpd01217_e
Xylitol	xylt	cpd00306	EX_xylt_e	EX_cpd00306_e

## Sheet: 4.SEED_BiGG_IDs
Chemical	BiGG_ID	SEED_ID	Notes
H2O	h2o	cpd00001
ATP	atp	cpd00002
NAD	nad	cpd00003
NADH	nadh	cpd00004
NADPH	nadph	cpd00005
NADP	nadp	cpd00006
O2	o2	cpd00007
ADP	adp	cpd00008
Phosphate	pi	cpd00009
CoA	coa	cpd00010
CO2	co2	cpd00011
PPi	ppi	cpd00012
NH3	nh4	cpd00013
UDP	udp	cpd00014
FAD	fad	cpd00015
Pyridoxal phosphate	pydx5p	cpd00016
S-Adenosyl-L-methionine	amet	cpd00017
AMP	amp	cpd00018
S-Adenosyl-homocysteine	ahcys	cpd00019
Pyruvate	pyr	cpd00020
Fe	fe	cpd00021
Acetyl-CoA	accoa	cpd00022
L-Glutamate	glu__L	cpd00023
2-Oxoglutarate	akg	cpd00024
H2O2	h2o2	cpd00025
UDP-glucose	udpg	cpd00026
D-Glucose	glc__D	cpd00027
Heme	pheme	cpd00028
Acetate	ac	cpd00029
Mn2+	mn2	cpd00030
GDP	gdp	cpd00031
Oxaloacetate	oaa	cpd00032
Glycine	gly	cpd00033
Zn2+	zn2	cpd00034
L-Alanine	ala__L	cpd00035
Succinate	succ	cpd00036
UDP-N-acetylglucosamine	uacgam	cpd00037
GTP	gtp	cpd00038
L-Lysine	lys__L	cpd00039
Glyoxalate	glx	cpd00040
L-Aspartate	asp__L	cpd00041
GSH	gthrd	cpd00042
UDP-galactose	udpgal	cpd00043
3-phosphoadenylylsulfate	paps	cpd00044
Adenosine 3-5-bisphosphate	pap	cpd00045
CMP	cmp	cpd00046
Formate	for	cpd00047
Sulfate	so4	cpd00048
Carboxylic acid	cbs_168	cpd00049
FMN	fmn	cpd00050
L-Arginine	arg__L	cpd00051
CTP	ctp	cpd00052
L-Glutamine	gln__L	cpd00053
L-Serine	ser__L	cpd00054
Formaldehyde	fald	cpd00055
TPP	thmpp	cpd00056
Alcohol	Alcohol	cpd00057
Cu2+	cu2	cpd00058
L-Ascorbate	ascb	cpd00059
L-Methionine	met__L	cpd00060
Phosphoenolpyruvate	pep	cpd00061
UTP	utp	cpd00062
Ca2+	ca2	cpd00063
Ornithine	orn	cpd00064
L-Tryptophan	trp__L	cpd00065
L-Phenylalanine	phe__L	cpd00066
H+	h	cpd00067
ITP	itp	cpd00068
L-Tyrosine	tyr__L	cpd00069
Malonyl-CoA	malcoa	cpd00070
Acetaldehyde	acald	cpd00071
D-fructose-6-phosphate	f6p	cpd00072
Urea	urea	cpd00073
S	s	cpd00074
Nitrite	no2	cpd00075
Sucrose	sucr	cpd00076
Catechol	catechol	cpd00077
Succinyl-CoA	succoa	cpd00078
D-glucose-6-phosphate	g6p	cpd00079
Glycerol-3-phosphate	glyc3p	cpd00080
Sulfite	so3	cpd00081
D-Fructose	fru	cpd00082
GDP-mannose	gdpmann	cpd00083
L-Cysteine	cys__L	cpd00084
beta-Alanine	ala_B	cpd00085
Propionyl-CoA	ppcoa	cpd00086
Tetrahydrofolate	thf	cpd00087
2,6-dichloroindophenol	DCIP	cpd00088
Glucose-1-phosphate	g1p	cpd00089
IDP	idp	cpd00090
UMP	ump	cpd00091
Uracil	ura	cpd00092
Anthranilate	anth	cpd00093
2-Oxobutyrate	2obut	cpd00094
Glycerone-phosphate	dhap	cpd00095
CDP	cdp	cpd00096
Pyrroloquinoline-quinone	pqq	cpd00097
Choline	chol	cpd00098
Cl-	cl	cpd00099
Glycerol	glyc	cpd00100
ribose-5-phosphate	r5p	cpd00101
Glyceraldehyde3-phosphate	g3p	cpd00102
PRPP	prpp	cpd00103
BIOT	btn	cpd00104
D-Ribose	rib__D	cpd00105
Fumarate	fum	cpd00106
L-Leucine	leu__L	cpd00107
Galactose	gal	cpd00108
Cytochrome c3+	ficytc	cpd00109
Cytochrome c2+	focytc	cpd00110
Oxidized glutathione	gthox	cpd00111
CMP-N-acetylneuraminate	CMP-N-acetylneuraminate	cpd00112
Isopentenyldiphosphate	ipdp	cpd00113
IMP	imp	cpd00114
dATP	datp	cpd00115
Methanol	meoh	cpd00116
D-Alanine	ala__D	cpd00117
Putrescine	ptrc	cpd00118
L-Histidine	his__L	cpd00119
Butyryl-CoA	btcoa	cpd00120
L-Inositol	inost	cpd00121
N-Acetyl-D-glucosamine	acgam	cpd00122
3-Methyl-2-oxobutanoate	3mob	cpd00123
3'-Phosphomononucleotide	3'-Phosphomononucleotide	cpd00124
5-10-Methylenetetrahydrofolate	mlthf	cpd00125
GMP	gmp	cpd00126
Phenol	PHENOL	cpd00127
Adenine	ade	cpd00128
L-Proline	pro__L	cpd00129
L-Malate	mal__L	cpd00130
Molybdenum	Molybdenum	cpd00131
L-Asparagine	asn__L	cpd00132
Nicotinamide	ncam	cpd00133
Palmitoyl-CoA	pmtcoa	cpd00134
Homocysteine	hcys__L	cpd00135
4-Hydroxybenzoate	4hbz	cpd00136
Citrate	cit	cpd00137
D-Mannose	man	cpd00138
Glycolate	glyclt	cpd00139
Propionate	ppa	cpd00141
Acetoacetate	acac	cpd00142
Phenylpyruvate	phpyr	cpd00143
UDPglucuronate	udpglcur	cpd00144
Hydroxypyruvate	hpyr	cpd00145
Carbamoylphosphate	cbp	cpd00146
5-Methylthioadenosine	5mta	cpd00147
5'-Phosphomononucleotide	5'-Phosphomononucleotide	cpd00148
Co2+	cobalt2	cpd00149
HCN	cyan	cpd00150
Thymine	thym	cpd00151
Agmatine	agm	cpd00152
Benzoate	bz	cpd00153
D-Xylose	xyl__D	cpd00154
Glycogen	glycogen	cpd00155
L-Valine	val__L	cpd00156
Glycerone	dha	cpd00157
D-Cellobiose	cellb	cpd00158	CELB
L-Lactate	lac__L	cpd00159
Cholesterol	Cholesterol	cpd00160
L-Threonine	thr__L	cpd00161
Aminoethanol	etha	cpd00162
UDP-xylose	UDP-xylose	cpd00163
Glucuronate	glcur	cpd00164
Hydroxylamine	Hydroxylamine	cpd00165
Calomide	adocbl	cpd00166
Ceramide	crm_hs	cpd00167
2,3-Dihydroxybenzoate	23dhb	cpd00168
3-Phosphoglycerate	3pg	cpd00169
Gluconolactone	g15lac	cpd00170
D-Ribulose5-phosphate	ru5p__D	cpd00171
Phenazine methosulfate	Phenazine methosulfate	cpd00172
NTP	NTP	cpd00173
Isoflurophate	Isoflurophate	cpd00174
UDP-N-acetyl-D-galactosamine	uacgala	cpd00175
2-keto-3-deoxygluconate	2ddglcn	cpd00176
dADP	dadp	cpd00177
Acetone	acetone	cpd00178
D-Maltose	malt	cpd00179
Oxalate	oxa	cpd00180
Cobamide	Cobamide	cpd00181
Adenosine	adn	cpd00182
Sarcosine	sarcs	cpd00183
Thymidine	thymd	cpd00184
D-Arabinose	arab__D	cpd00185
D-Glutamate	glu__D	cpd00186
Methanamine	mea	cpd00187
Arachidonate	Arachidonate	cpd00188
Methylene blue	Methylene blue	cpd00189
beta-D-Glucose	glc-D-B	cpd00190
3-Oxopropanoate	msa	cpd00191
4-Coumaroyl-CoA	coucoa	cpd00192
APS	aps	cpd00193
Methyl viologen	Methyl viologen	cpd00194
1-Alcohol	1-Alcohol	cpd00195
Acetylphosphate	actp	cpd00196
Protocatechuate	34dhbz	cpd00197
D-Xylulose5-phosphate	xu5p__D	cpd00198
4-Oxobutanoate	sucsal	cpd00199
4MOP	4mop	cpd00200
10-Formyltetrahydrofolate	10fthf	cpd00201
DMAPP	dmpp	cpd00202
1,3-Bisphospho-D-glycerate	13dpg	cpd00203
CO	co	cpd00204
K+	k	cpd00205
dCMP	dcmp	cpd00206
Guanine	gua	cpd00207
D-Lactose	lcts	cpd00208
Nitrate	no3	cpd00209
Taurine	taur	cpd00210
Butyrate	but	cpd00211
L-Sorbose	srb__L	cpd00212
Lipoamide	lpam	cpd00213
Palmitate	hdca	cpd00214
Pyridoxal	pydx	cpd00215
Chorismate	chor	cpd00216
Brachiose	isomal	cpd00217
Niacin	nac	cpd00218
Prephenate	pphn	cpd00219
Riboflavin	ribflv	cpd00220
D-Lactate	lac__D	cpd00221
GLCN	glcn	cpd00222
Glycerate	glyc-R	cpd00223
L-Arabinose	arab__L	cpd00224
Benzaldehyde	bzal	cpd00225
HYXN	hxan	cpd00226
L-Homoserine	hom__L	cpd00227
Dithiothreitol	dtt	cpd00228
Glycolaldehyde	gcald	cpd00229
Dihydrobiopterin	dhbpt	cpd00231
Neu5Ac	acnam	cpd00232
Tetrahydrobiopterin	thbpt	cpd00233
5-Dehydro-D-fructose	5-Dehydro-D-fructose	cpd00234
D-mannose-6-phosphate	man6p	cpd00235
D-Erythrose4-phosphate	e4p	cpd00236
Androstenedione	Androstenedione	cpd00237
Sedoheptulose7-phosphate	s7p	cpd00238
H2S	h2s	cpd00239
EDTA	EDTA	cpd00240
dGTP	dgtp	cpd00241
H2CO3	hco3	cpd00242
Fibrin	Fibrin	cpd00243
Ni2+	ni2	cpd00244
Aniline	Aniline	cpd00245
Inosine	ins	cpd00246
Orotate	orot	cpd00247
Quinate	quin-kt	cpd00248
Uridine	uri	cpd00249
Creatine	Creatine	cpd00250
ADPribose	adprib	cpd00251
Glutamine	cll_204	cpd00253
Mg	mg2	cpd00254
Bradykinin	Bradykinin	cpd00255
CDPcholine	cdpchol	cpd00256
Canavanine	Canavanine	cpd00257
D-Ribulose	rbl__D	cpd00258
D-Lyxulose	xylu__D	cpd00259
Isocitrate	icit	cpd00260
L-Lyxulose	xylu__L	cpd00261
Oxalyl-CoA	oxalcoa	cpd00262
Pyridoxol	pydxn	cpd00263
Spermidine	spmd	cpd00264
Amylopectin	Amylopectin	cpd00265
Carnitine	crn	cpd00266
Sphingoid	Sphingoid	cpd00267
H2S2O3	tsul	cpd00268
2-Oxoadipate	2oxoadp	cpd00269
Caffeoyl-CoA	caffcoa	cpd00270
Ferricyanide	Ferricyanide	cpd00271
GDP-L-fucose	gdpfuc	cpd00272
Glycoprotein	Glycoprotein	cpd00273
Citrulline	citr__L	cpd00274
L-Kynurenine	Lkynr	cpd00275
GLUM	gam	cpd00276
Deoxyguanosine	dgsn	cpd00277
Indolepyruvate	indpyr	cpd00278
Acetoacetyl-CoA	aacoa	cpd00279
D-Galacturonate	galur	cpd00280
GABA	4abut	cpd00281
S-Dihydroorotate	dhor-S	cpd00282
Geranyldiphosphate	grdp	cpd00283
6-Phospho-D-gluconate	6pgc	cpd00284
Phosphoethanolamine	ethamp	cpd00285
Undecaprenylphosphate	udcpp	cpd00286
3-Oxo-2-methylpropanoate	2mop	cpd00287
D-Glucosamine phosphate	gam6p	cpd00288
Geranylgeranyl diphosphate	ggdp	cpd00289
D-fructose-1,6-bisphosphate	fdp	cpd00290
L-Dopa	L-Dopa	cpd00291
HMG-CoA	hmgcoa	cpd00292
N-Acetyl-D-glucosamine 6-phosphate	acgam6p	cpd00293
dAMP	damp	cpd00294
dGDP	dgdp	cpd00295
dGMP	dgmp	cpd00296
dTDP	dtdp	cpd00297
dTMP	dtmp	cpd00298
dUMP	dump	cpd00299
Urate	urate	cpd00300
Sterol	Sterol	cpd00301
Zeatin	Zeatin	cpd00302
Elastin	Elastin	cpd00303
Retinal	Retinal	cpd00304
Thiamin	thm	cpd00305
Xylitol	xylt	cpd00306
Cytosine	csn	cpd00307
Malonate	maln	cpd00308
XAN	xan	cpd00309
Carnosine	Carnosine	cpd00310
Guanosine	gsn	cpd00311
Histamine	hista	cpd00312
Quercetin	quc	cpd00313
D-Mannitol	mnl	cpd00314
GDP-glucose	GDP-glucose	cpd00315
Pyrimidine	Pyrimidine	cpd00316
Tobramycin	Tobramycin	cpd00317
Tryptamine	Tryptamine	cpd00318
L-Menthol	L-Menthol	cpd00319
D-Aspartate	cll_345	cpd00320
Feruloyl-CoA	ferulcoa	cpd00321
L-Isoleucine	ile__L	cpd00322
L-Pipecolate	Lpipecol	cpd00323
MTTL	ch4s	cpd00324
Progesterone	Progesterone	cpd00325
Sinapoyl-CoA	Sinapoyl-CoA	cpd00326
strcoa	stcoa	cpd00327
Streptomycin	Stmyn	cpd00328
Cyclohexanone	Cyclohexanone	cpd00329
Dihydrofolate	dhf	cpd00330
cis-Aconitate	acon-C	cpd00331
Mevalonic acid	mev-R	cpd00332
(E)-Cinnamate	cinnm	cpd00333
L-Lactaldehyde	lald__L	cpd00334
Dehydroascorbate	Dehydroascorbate	cpd00335
Prostaglandin H2	Prostaglandin H2	cpd00336
Hydrouracil	56dura	cpd00337
5-Aminolevulinate	5aop	cpd00338
5-Aminopentanoate	5aptn	cpd00339
2,5-Dioxopentanoate	25dop	cpd00340
N-Carbamoylputrescine	cbmps	cpd00341
N-Acetylornithine	acorn	cpd00342
N-Carbamoyl-L-aspartate	cbasp	cpd00343
N-Formimino-L-glutamate	forglu	cpd00344
5-Methyltetrahydrofolate	5mthf	cpd00345
L-Aspartate4-semialdehyde	aspsa	cpd00346
5-10-Methenyltetrahydrofolate	methf	cpd00347
D-Galactose 1-phosphate	gal1p	cpd00348
Sedoheptulose 1,7-bisphosphate	s17bp	cpd00349
Farnesyldiphosphate	frdp	cpd00350
Saccharopine	saccrp__L	cpd00351
delta1-Piperideine-6-L-carboxylate	thp2c	cpd00352
D-threo-Isocitric acid	D-threo-Isocitric acid	cpd00353
NDP	NDP	cpd00354
Nicotinamide ribonucleotide	nmn	cpd00355
dCTP	dctp	cpd00356
TTP	dttp	cpd00357
dUTP	dutp	cpd00358
indol	indole	cpd00359
Purine	purine	cpd00360
ACTN	actn-R	cpd00361
Estrone	Estrone	cpd00362
Ethanol	etoh	cpd00363
Chinone	Chinone	cpd00364
Retinol	Retinol	cpd00365
Ribitol	Ribitol	cpd00366
Cytidine	Cytidine	cpd00367
D-Lyxose	lyx__D	cpd00368
Ecdysone	Ecdysone	cpd00369
Lichenan	cbs_422	cpd00370
Propanal	ppal	cpd00371
Pyrazole	Pyrazole	cpd00372
Sinapate	Sinapate	cpd00373
Tyramine	tym	cpd00374
Arylamide	Arylamide	cpd00375
Bilirubin	Bilirubin	cpd00376
Formamide	frmd	cpd00378
Glutarate	glutar	cpd00379
Itaconate	itacon	cpd00380
L-Cystine	L-Cystine	cpd00381
Melitose	raffin	cpd00382
Shikimate	skm	cpd00383
Sisomicin	Sisomicin	cpd00384
Sulochrin	Sulochrin	cpd00385
D-Malate	mal__D	cpd00386
ADPglucose	adpglc	cpd00387
Allantoate	alltt	cpd00388
Biliverdin	Biliverdin	cpd00389
CDP-glucose	CDP-glucose	cpd00390
D-Xylonate	D-Xylonate	cpd00391
Phycite	Phycite	cpd00392
Folate	fol	cpd00393
Gentamicin	Gentamicin	cpd00394
L-Cysteate	Lcyst	cpd00395
L-Rhamnose	rmn	cpd00396
L-Ribulose	rbl__L	cpd00397
Naringenin	Naringenin	cpd00398
Oleoyl-CoA	Oleoyl-CoA	cpd00399
Acrylate	acryl	cpd00400
Benzoyl-CoA	Benzoyl-CoA	cpd00401
CDPglycerol	cdpglyc	cpd00402
D-Mannonate	mana	cpd00403
D-Ornithine	D-Ornithine	cpd00404
Hexadecanal	hxdcal	cpd00405
Hypotaurine	Hypotaurine	cpd00406
Limonene	Limonene	cpd00407
Pantoate	pant-R	cpd00408
Androsterone	Androsterone	cpd00409
Cytochrome c	cytcc	cpd00410
D-Tryptophan	D-Tryptophan	cpd00411
Deoxyuridine	duri	cpd00412
Glutaryl-CoA	glutcoa	cpd00413
Glycopeptide	Glycopeptide	cpd00414
Quinol	hqn	cpd00415
Itaconyl-CoA	itaccoa	cpd00416
L-Lyxitol	abt__L	cpd00417	L-arabinol
NO	no	cpd00418
PM	pydam	cpd00419
Testosterone	Testosterone	cpd00420
Triphosphate	pppi	cpd00421
Cinnamoyl-CoA	Cinnamoyl-CoA	cpd00422
Vitamin B12r	cbl2	cpd00423
Cystathionine	Cystathionine	cpd00424
(CH3)2NH	dma	cpd00425
Homogentisate	hgentis	cpd00426
L-Arabinonate	L-Arabinonate	cpd00427
2-Oxopropanal	mthgxl	cpd00428
Arterenol	Arterenol	cpd00429
PACT	pac	cpd00430
Sphingomyelin	Sphingomyelin	cpd00431
meso-Tartrate	tartr-M	cpd00432
(+)-Neomenthol	(+)-Neomenthol	cpd00433
4-Aminobutanal	4abutn	cpd00434
Phenylcarbinol	bzalc	cpd00435
Cyclopentanone	Cyclopentanone	cpd00436
D-Tagaturonate	tagur	cpd00437
Deoxyadenosine	dad_2	cpd00438
Mandelonitrile	Mandelonitrile	cpd00439
Phosphoramidon	Phosphoramidon	cpd00440
(CH3)3N	tma	cpd00441
(3S)-Citryl-CoA	(3S)-Citryl-CoA	cpd00442
ABEE	4abz	cpd00443
CDPethanolamine	cdpea	cpd00444
Cyclohexanamine	Cyclohexanamine	cpd00445
cAMP	camp	cpd00446
Betaine aldehyde	betald	cpd00447
D-Glyceraldehyde	glyald	cpd00448
Dihydrolipoamide	dhlam	cpd00449
Methyl sulfide	dms	cpd00450
Glycocyamine	Glycocyamine	cpd00451
Phenylacetyl-CoA	phaccoa	cpd00452
1,2-Propanediol	12ppd__S	cpd00453
Dinoprostone	Dinoprostone	cpd00454
2-Deoxy-D-glucose	2dglc	cpd00455
3-Hydroxybenzoate	3-Hydroxybenzoate	cpd00456
Phosphocholine	cholp	cpd00457
Coniferol	confrl	cpd00458
N-Acylneuraminate	N-Acylneuraminate	cpd00459
Sulfoacetaldehyde	2saa	cpd00460
Oxopent-4-enoate	op4en	cpd00461
Cholestenone	Cholestenone	cpd00463
alpha-Tolualdehyde	pacald	cpd00464
Ureidoglycolate	urdglyc	cpd00465
o-Phenanthroline	o-Phenanthroline	cpd00466
3-Sulfinoalanine	3sala	cpd00467
Deoxyribonucleotide	Deoxyribonucleotide	cpd00468
N-Acetyllactosamine	N-Acetyllactosamine	cpd00469
N1-Acetylspermidine	N1aspmd	cpd00470
Quercetin 3-sulfate	Quercetin 3-sulfate	cpd00471
UDPgalacturonate	udpgalur	cpd00472
3-Dehydro-L-gulonate	3dhguln	cpd00473
3-Oxo-delta4-steroid	3-Oxo-delta4-steroid	cpd00474
Ribose 1-phosphate	r1p	cpd00475
N-Acetyl-L-glutamate	acglu	cpd00477
Pyridoxine phosphate	pdx5p	cpd00478
Gentisate	Gentisate	cpd00479
2-Dehydro-D-gluconate	2dhglcn	cpd00480
Isobutyryl-CoA	ibcoa	cpd00481
2-Phospho-D-glycerate	2pg	cpd00482
3-Hydroxyanthranilate	3hanthrn	cpd00483
p-Hydroxybenzaldehyde	4hbald	cpd00484
D-Mannose1-phosphate	man1p	cpd00485
Indoleacetaldehyde	id3acald	cpd00486
Higher fatty acid	Higher fatty acid	cpd00487
PGF2a	PGF2a	cpd00488
4-Hydroxyphenylacetate	4hphac	cpd00489
5-Hydroxy-L-tryptophan	5-Hydroxy-L-tryptophan	cpd00490
D-glucitol 6-phosphate	mnl1p	cpd00491
N-Acetyl-D-mannosamine	acmana	cpd00492
Pyridoxamine phosphate	pyam5p	cpd00493
4-Hydroxymandelonitrile	4-Hydroxymandelonitrile	cpd00494
4-Methylene-L-glutamate	4-Methylene-L-glutamate	cpd00495
D-Arabinono-1,4-lactone	Dara14lac	cpd00496
XMP	xmp	cpd00497
2-Aceto-2-hydroxybutanoate	2ahbut	cpd00498
D-glucose-1,6-biphosphate	g16bp	cpd00499
beta-D-Glucose 1-phosphate	g1p-B	cpd00501
5-Formiminotetrahydrofolate	5-Formiminotetrahydrofolate	cpd00502
D-Fructose 2,6-bisphosphate	f26bp	cpd00503
LL-2,6-Diaminopimelate	26dap-LL	cpd00504
gamma-Glutamylcysteine	glucys	cpd00506
Glycerophosphocholine	g3pc	cpd00507
3MOP	3mop	cpd00508
deoxyribose-1-phosphate	2dr1p	cpd00509
deoxyribose-5-phosphate	2dr5p	cpd00510
Androstanedione	Androstanedione	cpd00511
Deoxynucleoside 3'-phosphate	Deoxynucleoside 3'-phosphate	cpd00512
Deoxynucleoside 5'-phosphate	Deoxynucleoside 5'-phosphate	cpd00513
Deoxynucleoside triphosphate	Deoxynucleoside triphosphate	cpd00514
5-Dehydro-4-deoxy-D-glucarate	5d4dglcr	cpd00515
meso-2,6-Diaminopimelate	26dap-M	cpd00516
1-Acyl-sn-glycerol 3-phosphate	1ag3p	cpd00517
2-Hydroxymuconic semialdehyde	2hmcnsad	cpd00518
D-methylmalonyl-CoA	mmcoa-S	cpd00519
2-Dehydro-3-deoxy-L-pentonate	2-Dehydro-3-deoxy-L-pentonate	cpd00520
dTDP-4-oxo-6-deoxy-D-glucose	dtdp4d6dg	cpd00521
dTDP-4-oxo-L-rhamnose	dtdp4d6dm	cpd00522
Trehalose 6-phosphate	tre6p	cpd00523
2-Inosose	2ins	cpd00524
UDP-N-acetylmuramoyl-L-alanyl-D-glutamate	uamag	cpd00525
Cholate	Cholate	cpd00526
Prostaglandin D2	Prostaglandin D2	cpd00527
N2	n2	cpd00528
XTP	xtp	cpd00530
Hg2+	hg2	cpd00531
O2-	o2s	cpd00532
dCDP	dcdp	cpd00533
I-	I-	cpd00534
Oleate	oleac	cpd00536
Panose	Panose	cpd00537
Pterin	Pterin	cpd00538
BET	glyb	cpd00540
Lipoate	lipoate	cpd00541
R-CN	R-CN	cpd00542
Orcinol	Orcinol	cpd00543
Tropine	Tropine	cpd00544
Ubenimex	Ubenimex	cpd00545
Cortisol	Cortisol	cpd00546
Cysteine	cll_451	cpd00547
D-Hexose	D-Hexose	cpd00548
D-Lysine	lys__D	cpd00549
D-Serine	ser__D	cpd00550
DTYL	cll_453	cpd00551
F-	F-	cpd00552
Macrocin	Macrocin	cpd00553
Nicotine	Nicotine	cpd00554
OT	OT	cpd00555
Pyridine	Pyridine	cpd00556
Siroheme	sheme	cpd00557
Spermine	sprm	cpd00558
Supraene	sql	cpd00559
Tungsten	Tungsten	cpd00560
Vanillin	vanln	cpd00561
1-Octanol	OCTANOL	cpd00562
Berberine	Berberine	cpd00563
Bergaptol	Bergaptol	cpd00564
Coniferin	Coniferin	cpd00565
Cortisone	Cortisone	cpd00566
D-Proline	D-Proline	cpd00567
D-Sorbose	D-Sorbose	cpd00568
Digitonin	Digitonin	cpd00569
Flavanone	Flavanone	cpd00570
Glucarate	Glucarate	cpd00571
Histidine	cll_459	cpd00572
L-Idonate	idon__L	cpd00573
Mevaldate	Mevaldate	cpd00574
Pepstatin	Pepstatin	cpd00575
Phloretin	Phloretin	cpd00576
Tretin M	Tretin M	cpd00577
Scytalone	Scytalone	cpd00578
Serotonin	Serotonin	cpd00579
Tropinone	Tropinone	cpd00580
Urocanate	urcan	cpd00581
Vestitone	Vestitone	cpd00582
L-Adrenaline	L-Adrenaline	cpd00583
CDP-ribitol	CDP-ribitol	cpd00584
Creatinine	Creatinine	cpd00585
D-Arginine	D-Arginine	cpd00586
D-Cysteine	cys__D	cpd00587
Sorbitol	sbt__D	cpd00588
D-Tagatose	tag__D	cpd00589
Dicumarol	Dicumarol	cpd00590
Ethylamine	Ethylamine	cpd00591
Formyl-CoA	forcoa	cpd00592
Isoflavone	Isoflavone	cpd00593
Gulonate	Gulonate	cpd00594
Nucleoside	Nucleoside	cpd00595
Oxalurate	oxur	cpd00596
Valerate	pta	cpd00597
Propynoate	Propynoate	cpd00598
SALC	salc	cpd00599
D-Camphor	D-Camphor	cpd00601
(-)-Camphor	(-)-Camphor	cpd00602
4-Coumarate	T4hcinnm	cpd00604
Malonylurea	Malonylurea	cpd00605
Biochanin A	Biochanin A	cpd00606
Citramalate	Citramalate	cpd00607
D-Altronate	altrn	cpd00608
D-Glucarate	glcr	cpd00609
D-Glutamine	D-Glutamine	cpd00610
D-Threonine	D-Threonine	cpd00611
Dopaquinone	Dopaquinone	cpd00612
Hexadecanol	C16:0-OH	cpd00613
Iron-sulfur	Iron-sulfur	cpd00614
Bekanamycin	Bekanamycin	cpd00615
Pretyrosine	CPD-659	cpd00616
Lactoyl-CoA	Lactoyl-CoA	cpd00617
Naphthalene	Naphthalene	cpd00618
Oxomalonate	Oxomalonate	cpd00619
Pantetheine	ptth	cpd00620
Catenulin	Catenulin	cpd00621
Sepiapterin	Sepiapterin	cpd00622
Sphinganine	sphgn	cpd00623
Streptidine	Streptidine	cpd00624
Xanthotoxol	Xanthotoxol	cpd00625
dTDPglucose	dtdpglu	cpd00626
l-Menthone	l-Menthone	cpd00627
(R)-Prunasin	(R)-Prunasin	cpd00628
2-Furoyl-CoA	2-Furoyl-CoA	cpd00629
3-Oxoadipate	3oxadp	cpd00630
4-Pyridoxate	4-Pyridoxate	cpd00631
6-Oxocineole	6-Oxocineole	cpd00632
Ethyl acetate	Ethyl acetate	cpd00633
Chlorogenate	CHLOROGENATE	cpd00634
Cbl	cbl1	cpd00635
Hexalin	Hexalin	cpd00636
D-Methionine	met__D	cpd00637
Deamido-NAD	dnad	cpd00638
Formononetin	Formononetin	cpd00639
Gibberellin 1	Gibberellin 1	cpd00640
L-Histidinol	histd	cpd00641
L-Rhamnulose	rml	cpd00642
Methanofuran	Methanofuran	cpd00643
PAN	pnto__R	cpd00644
2-Oxostearate	2-Oxostearate	cpd00645
PNP	PNP	cpd00646
Aminomalonate	Aminomalonate	cpd00647
Angiotensin I	Angiotensin I	cpd00648
Coenzyme F420	Coenzyme F420	cpd00649
Crotonyl-CoA	butd2coa	cpd00650
D-Arabinonate	D-Arabinonate	cpd00651
D-Mucic acid	galctr__D	cpd00652
D-Galactonate	galctn__D	cpd00653
Deoxycytidine	dcyt	cpd00654
Dephospho-CoA	dpcoa	cpd00655
Galactomannan	galman	cpd00656
Homocarnosine	Homocarnosine	cpd00657
Isochorismate	ichor	cpd00658
Nitrous oxide	n2o	cpd00659
Pentanoyl-CoA	C5:0-COA	cpd00660
Pregnan-21-al	Pregnan-21-al	cpd00661
Pregnan-21-ol	Pregnan-21-ol	cpd00662
Acrylyl-CoA	Acrylyl-CoA	cpd00663
Tos-Lys-CH2Cl	Tos-Lys-CH2Cl	cpd00664
alpha-Maltose	alpha-Maltose	cpd00665
Tartrate	tartr__L	cpd00666
11-cis-Retinol	11-cis-Retinol	cpd00667
ALCTT	alac-S	cpd00668
2-Oxohexanoate	2-Oxohexanoate	cpd00669
Cinnamaldehyde	Cinnamaldehyde	cpd00670
Citramalyl-CoA	Citramalyl-CoA	cpd00671
D-Fructuronate	fruur	cpd00672
Dihydrothymine	56dthm	cpd00673
Gentamicin C1a	Gentamicin C1a	cpd00674
LTA4	LTA4	cpd00675
Ribonucleoside	Ribonucleoside	cpd00676
3-Methyladenine	3-Methyladenine	cpd00677
Benzyl viologen	Benzyl viologen	cpd00678
Cephalosporin C	Cephalosporin C	cpd00679
Chloramphenicol	cm	cpd00680
Choline sulfate	chols	cpd00681
CoA-glutathione	CoA-glutathione	cpd00682
Dihydropteroate	dhpt	cpd00683
Dimethylmaleic acid	Dimethylmaleic acid	cpd00684
Ferricytochrome	Ferricytochrome	cpd00685
Ferrocytochrome	Ferrocytochrome	cpd00686
Isonocardicin A	Isonocardicin A	cpd00687
Thioglycol	Thioglycol	cpd00688
Porphobilinogen	ppbng	cpd00689
Sinapine	Sinapine	cpd00690
UDP-L-arabinose	UDP-L-arabinose	cpd00691
D-Lactaldehyde	lald__D	cpd00693
2-Aminoadenosine	2-Aminoadenosine	cpd00694
2-Oxoglutaramate	2-Oxoglutaramate	cpd00695
3',5'-Cyclic CMP	35ccmp	cpd00696
cGMP	35cgmp	cpd00697
3',5'-Cyclic IMP	35cimp	cpd00698
5-Dehydroquinate	3dhq	cpd00699
AMP 2'-phosphate	amp2p	cpd00700
DTE	DTE	cpd00701
Estradiol	Estradiol	cpd00702
Indoleacetate	ind3ac	cpd00703
Tryptophol	ind3eth	cpd00704
L-2-Aminoadipate	L2aadp	cpd00705
Mercaptopyruvate	mercppyr	cpd00706
Prostaglandin B1	Prostaglandin B1	cpd00707
Sterigmatocystin	Sterigmatocystin	cpd00708
beta D-Galactose	cll_199	cpd00709
beta-D-Glucoside	beta-D-Glucoside	cpd00710
(-)-trans-Carveol	(-)-trans-Carveol	cpd00711
2-Dehydropantoate	2dhp	cpd00712
3',5'-Cyclic dAMP	35cdamp	cpd00713
3-Hydroxypropanal	3-Hydroxypropanal	cpd00714
4-Pyridoxolactone	4-Pyridoxolactone	cpd00715
Aromatic oxo acid	Aromatic oxo acid	cpd00716
Aromadendrin	Aromadendrin	cpd00717
Dihydroxyfumarate	Dihydroxyfumarate	cpd00718
GDP-D-mannuronate	gdpmanur	cpd00719
L-Tryptophanamide	L-Tryptophanamide	cpd00720
N-Acetylserotonin	N-Acetylserotonin	cpd00721
O-Acetyl-L-serine	acser	cpd00722
Renilla luciferin	Renilla luciferin	cpd00723
alpha-D-Galactose	alpha-D-Galactose	cpd00724
p-Mercuribenzoate	p-Mercuribenzoate	cpd00725
1,3-Propanediamine	13dampp	cpd00726
2-Phosphoglycolate	2pglyc	cpd00727
4-Hydroxybutanoate	4hdxbutn	cpd00728
5-Aminopentanamide	5apentam	cpd00729
Aquacobalamin	Aquacobalamin	cpd00730
Ala-Ala	alaala	cpd00731
D-Prephenyllactate	D-Prephenyllactate	cpd00732
Ferricytochrome b1	Ferricytochrome b1	cpd00733
Ferrocytochrome b1	Ferrocytochrome b1	cpd00734
Formylmethanofuran	Formylmethanofuran	cpd00735
Hexose 1-phosphate	Hexose 1-phosphate	cpd00736
Gynesine	Gynesine	cpd00737
phosphoserine	pser__L	cpd00738
Reduced riboflavin	ribflvRD	cpd00739
Trimethylsulfonium	Trimethylsulfonium	cpd00740
UDP-2-deoxyglucose	UDP-2-deoxyglucose	cpd00741
Allophanate	allphn	cpd00742
L-Citramalyl-CoA	L-Citramalyl-CoA	cpd00743
(R)-Pantolactone	(R)-Pantolactone	cpd00744
Hydracrylic acid	Hydracrylic acid	cpd00745
3-Isopropylcatechol	3-Isopropylcatechol	cpd00746
L-Hydroxyproline	L-Hydroxyproline	cpd00747
5'-Phosphomonoester	5'-Phosphomonoester	cpd00748
5-HTP	5-HTP	cpd00749
D-Fucose	D-Fucose	cpd00750
L-Fucose	fuc__L	cpd00751
6-Hydroxynicotinate	6hnac	cpd00752
Aromatic amino acid	Aromatic amino acid	cpd00753
Dihydrostreptomycin	Dihydrostreptomycin	cpd00754
Hydroxymethylbilane	hmbil	cpd00755
Dimethylglycine	dmgly	cpd00756
N6-Hydroxy-L-lysine	N6-Hydroxy-L-lysine	cpd00757
N8-Acetylspermidine	n8aspmd	cpd00758
S-Formylglutathione	fglut-S	cpd00759
2-Methylbutyryl-CoA	2mbcoa	cpd00760
3-Oxo-delta5-steroid	3-Oxo-delta5-steroid	cpd00761
4-Guanidinobutanoate	4gubut	cpd00762
4-Maleylacetoacetate	4mlacac	cpd00763
7-8-Diaminononanoate	dann	cpd00764
L-Gulonolactone	L-Gulonolactone	cpd00765
Ascorbate radical	Ascorbate radical	cpd00766
N-Acetyl-L-aspartate	N-Acetyl-L-aspartate	cpd00767
N-Carbamoylsarcosine	N-Carbamoylsarcosine	cpd00768
N-Formyl-L-aspartate	N-Formyl-L-aspartate	cpd00769
N-Formyl-L-glutamate	Nforglu	cpd00770
N-Methyl-L-glutamate	N-Methyl-L-glutamate	cpd00771
L-Theanine	L-Theanine	cpd00772
UDP-MurNAc	uamr	cpd00773
UroporphyrinogenIII	uppg3	cpd00774
(R)-4-Dehydropantoate	(R)-4-Dehydropantoate	cpd00775
Squalene 2,3-oxide	Ssq23epx	cpd00776
(S)-6-Hydroxynicotine	(S)-6-Hydroxynicotine	cpd00777
2,5-Dihydroxypyridine	dhpyr	cpd00778
L-Diiodotyrosine	L-Diiodotyrosine	cpd00779
Fumarylacetoacetate	4fumacac	cpd00780
5-Dehydrogluconate	5dglcn	cpd00781
Pimeloyl-CoA	pmcoa	cpd00782
CMP-N-acylneuraminate	CMP-N-acylneuraminate	cpd00783
Dihydroresorcinol	Dihydroresorcinol	cpd00784
D-Galactose 6-sulfate	D-Galactose 6-sulfate	cpd00785
Ribitol 5-phosphate	Ribitol 5-phosphate	cpd00786
Desulfoglucotropeolin	Desulfoglucotropeolin	cpd00787
N-Acetyl-beta-alanine	N-Acetyl-beta-alanine	cpd00788
N-Sulfo-D-glucosamine	N-Sulfo-D-glucosamine	cpd00789
O-Acetyl-L-homoserine	achms	cpd00790
ProtoporphyrinogenIX	pppg9	cpd00791
Reduced coenzyme F420	Reduced coenzyme F420	cpd00792
Thiamine phosphate	thmmp	cpd00793
TRHL	tre	cpd00794
(R)-2-Hydroxyglutarate	(R)-2-Hydroxyglutarate	cpd00795
(R)-3,3-Dimethylmalate	(R)-3,3-Dimethylmalate	cpd00796
(R)-3-Hydroxybutanoate	bhb	cpd00797
16alpha-Hydroxysteroid	16alpha-Hydroxysteroid	cpd00798
Deacetylvindoline	Deacetylvindoline	cpd00799
8-Amino-7-oxononanoate	8aonn	cpd00800
Cellobiose-1,5-lactone	Cellobiose-1,5-lactone	cpd00801
D-fructose-1-phosphate	f1p	cpd00802
D-Ribose 5-diphosphate	D-Ribose 5-diphosphate	cpd00803
Sorbitol 6-phosphate	sbt6p	cpd00804
D-Tagatose 6-phosphate	tag6p__D	cpd00805
L-Fuculose1-phosphate	fc1p	cpd00806
L-histidinol-phosphate	hisp	cpd00807
L-ribulose-5-phosphate	ru5p__L	cpd00808
O-Phospho-L-homoserine	phom	cpd00809
Orotidylic acid	orot5p	cpd00810
(CH3)3NO	tmao	cpd00811
5-phosphomevalonate	5pmev	cpd00812
Pyrogallol	Pyrogallol	cpd00813
4-Methylene-L-glutamine	4-Methylene-L-glutamine	cpd00814
2-Oxo-5-aminovalerate	2-Oxo-5-aminovalerate	cpd00815
7,8-Dihydroxykynurenate	7,8-Dihydroxykynurenate	cpd00816
D-Arabinose5-phosphate	ara5p	cpd00817
6-Phospho-D-galactose	dgal6p	cpd00818
L-Arabinono-1,4-lactone	L-Arabinono-1,4-lactone	cpd00819
L-Galactono-1,4-lactone	L-Galactono-1,4-lactone	cpd00820
Nucleoside 5'-phosphate	Nucleoside 5'-phosphate	cpd00821
O-Succinyl-L-homoserine	suchms	cpd00822
Oxidized dithiothreitol	dttOX	cpd00823
Sphinganine 1-phosphate	sph1p	cpd00824
Streptidine 6-phosphate	Streptidine 6-phosphate	cpd00825
(-)-trans-Isopiperitenol	(-)-trans-Isopiperitenol	cpd00826
18-Hydroxycorticosterone	18-Hydroxycorticosterone	cpd00827
2-Dehydropantolactone	2-Dehydropantolactone	cpd00828
2-trans,6-trans-Farnesol	2-trans,6-trans-Farnesol	cpd00829
4-Hydroxy-2-oxoglutarate	4h2oglt	cpd00830
L-Rhamnulose 1-phosphate	rml1p	cpd00831
N-Acetyl-D-chondrosamine	acgal	cpd00832
N-Acetyl-D-glucosaminate	N-Acetyl-D-glucosaminate	cpd00833
Phosphopantetheine	pan4p	cpd00834
Phospho-beta-D-glucoside	Phospho-beta-D-glucoside	cpd00835
S-Acetyldihydrolipoamide	adhlam	cpd00836
S-Adenosylmethioninamine	ametam	cpd00837
Streptomycin 6-phosphate	Streptomycin 6-phosphate	cpd00838
alpha-D-Glucosyl-protein	alpha-D-Glucosyl-protein	cpd00839
L-beta-Lysine	36dahx	cpd00840
5-diphosphomevalonate	5dpmev	cpd00841
(S)-3-Hydroxybutyryl-CoA	3hbycoa	cpd00842
Tartronate semialdehyde	2h3opp	cpd00843
2-Hydroxycyclohexan-1-one	2-Hydroxycyclohexan-1-one	cpd00844
4-Trimethylammoniobutanal	4-Trimethylammoniobutanal	cpd00845
5'-Phosphomononucleotides	5'-Phosphomononucleotides	cpd00846
Ribose 1,5-bisphosphate	r15bp	cpd00847
1-Methylhistidine	NPmehis	cpd00848
Quercetin 3,3'-bissulfate	Quercetin 3,3'-bissulfate	cpd00849
Quercetin 3,4'-bissulfate	Quercetin 3,4'-bissulfate	cpd00850
trans-4-Hydroxy-L-proline	4hpro-LT	cpd00851
beta-Glucogallin	beta-Glucogallin	cpd00852
DPG	23dpg	cpd00853
Homoprotocatechuate	34dhpha	cpd00854
beta-Pyrazol-1-ylalanine	beta-Pyrazol-1-ylalanine	cpd00855
3-Carboxy-cis,cis-muconate	3cmuc	cpd00856
Provitamin D3	Provitamin D3	cpd00857
L-Glutamate5-semialdehyde	glu5sa	cpd00858
Pseudouridine 5'-phosphate	psd5p	cpd00859
S-Succinyldihydrolipoamide	sdhlam	cpd00860
UDP-N-acetyl-D-mannosamine	uacmam	cpd00861
alpha-D-Hexose 1-phosphate	alpha-D-Hexose 1-phosphate	cpd00862
beta-D-Glucose 6-phosphate	g6p-B	cpd00863
1,3,8-Naphthalenertriol	1,3,8-Naphthalenertriol	cpd00864
1-O-Sinapoyl-beta-D-glucose	1-O-Sinapoyl-beta-D-glucose	cpd00865
17alpha-Hydroxyprogesterone	17alpha-Hydroxyprogesterone	cpd00866
Inositol 1-phosphate	mi1p__D	cpd00867
p-hydroxyphenylpyruvate	34hpp	cpd00868
4-methylthio 2-oxobutyrate	2kmb	cpd00869
gamma-butyrobetaine	gbbtn	cpd00870
D-Ribulose 1,5-bisphosphate	rb15bp	cpd00871
N,N-Dimethylaniline N-oxide	N,N-Dimethylaniline N-oxide	cpd00872
Nicotinate ribonucleotide	nicrnt	cpd00873
(3S,5S)-3,5-Diaminocaproate	(3S,5S)-3,5-Diaminocaproate	cpd00874
KDO	kdo	cpd00875
3-Hydroxyisobutyrate	3hmp	cpd00876
Lathosterol	Lathosterol	cpd00877
Glucocerebroside	Glucocerebroside	cpd00878
Palmitoylglycerone phosphate	Palmitoylglycerone phosphate	cpd00879
1-Phospho-alpha-D-glucuronate	1-Phospho-alpha-D-glucuronate	cpd00880
Caffeate	34dhcinm	cpd00881
Melilotate	Melilotate	cpd00882
N-Acylneuraminate 9-phosphate	N-Acylneuraminate 9-phosphate	cpd00883
N(omega)-(ADP-D-ribosyl)-L-arginine	N(omega)-(ADP-D-ribosyl)-L-arginine	cpd00884
Phytate	inoshp	cpd00885
D-3-Amino-isobutanoate	D-3-Amino-isobutanoate	cpd00886
3-(3,4-Dihydroxyphenyl)lactate	3-(3,4-Dihydroxyphenyl)lactate	cpd00887
N-Methylethanolamine phosphate	N-Methylethanolamine phosphate	cpd00888
5-Hydroxylysine	5-Hydroxylysine	cpd00889
UDP-N-acetylmuramoyl-L-alanine	uama	cpd00890
L-methylmalonyl-CoA	mmcoa-R	cpd00891
scyllo-Inosamine	scyllo-Inosamine	cpd00892
2-(Acetamidomethylene)succinate	2-(Acetamidomethylene)succinate	cpd00893
2-Dehydro-3-deoxy-D-galactonate	2dh3dgal	cpd00894
H4MPT	h4mpt	cpd00895
6-Phospho-2-dehydro-D-gluconate	6p2dglcn	cpd00896
CDP-4-dehydro-6-deoxy-D-glucose	CDP-4-dehydro-6-deoxy-D-glucose	cpd00897
Inositol 1,4-bisphosphate	Inositol 1,4-bisphosphate	cpd00898
Dihydrostreptomycin 6-phosphate	Dihydrostreptomycin 6-phosphate	cpd00899
GDP-4-dehydro-D-rhamnose	gdpddman	cpd00900
Methyl 2-diazoacetamidohexonate	Methyl 2-diazoacetamidohexonate	cpd00901
sn-glycero-3-Phospho-1-inositol	g3pi	cpd00902
12-OPDA	12-OPDA	cpd00903
DHA	DHA	cpd00904
Guanosine 3',5'-bis(diphosphate)	gdpdp	cpd00905
all-trans-Hexaprenyl diphosphate	hexdp	cpd00906
alpha-D-glucose-1,6-biphosphate	cbs_41	cpd00907
Glycerophosphoethanolamine	g3pe	cpd00908
1-Aminocyclopropane-1-carboxylate	1-Aminocyclopropane-1-carboxylate	cpd00909
Galactinol	1Dgali	cpd00910
6-phospho-D-glucono-1-5-lactone	6pgl	cpd00911
N-Acetyl-beta-D-glucosaminylamine	N-Acetyl-beta-D-glucosaminylamine	cpd00912
2',3'-Cyclic nucleotide	2',3'-Cyclic nucleotide	cpd00913
Inositol 1,3,4-trisphosphate	Inositol 1,3,4-trisphosphate	cpd00914
3,5-Diiodo-4-hydroxyphenylpyruvate	3,5-Diiodo-4-hydroxyphenylpyruvate	cpd00915
Ins(1,4,5)P3	mi145tp__D	cpd00916
7,8-Dihydro-7,8-dihydroxykynurenate	7,8-Dihydro-7,8-dihydroxykynurenate	cpd00917
2-Acetamido-5-oxopentanoate	acg5sa	cpd00918
Homocitrate	hcit	cpd00919
4-(2-Aminophenyl)-2,4-dioxobutanoate	4-(2-Aminophenyl)-2,4-dioxobutanoate	cpd00920
N-(6-Aminohexanoyl)-6-aminohexanoate	6ax6ax	cpd00921
delta1-Piperideine-2-carboxylate	1pipdn2c	cpd00922
3-Hydroxy-N6,N6,N6-trimethyl-L-lysine	3-Hydroxy-N6,N6,N6-trimethyl-L-lysine	cpd00923
AppppA	ap4a	cpd00924
GppppG	gp4g	cpd00925
Anserine	Anserine	cpd00926
(-)-Glycinol	(-)-Glycinol	cpd00927
3,7-Di-O-methylquercetin	3,7-Di-O-methylquercetin	cpd00928
3'-Deoxydihydrostreptomycin 6-phosphate	3'-Deoxydihydrostreptomycin 6-phosphate	cpd00929
imidazole acetol-phosphate	imacp	cpd00930
5-Amino-6--5-phosphoribosylaminouracil	5apru	cpd00931
5-O--1-Carboxyvinyl-3-phosphoshikimate	3psme	cpd00932
3-Hydroxy-2-methylpyridine-5-carboxylate	3-Hydroxy-2-methylpyridine-5-carboxylate	cpd00933
Inositol 1,3,4,5-tetrakisphosphate	mi1345p	cpd00934
2,6-Dioxo-6-phenylhexa-3-enoate	2,6-Dioxo-6-phenylhexa-3-enoate	cpd00935
5-Formyl-H4MPT	5-Formyl-H4MPT	cpd00936
trans-2'-Carboxybenzalpyruvate	trans-2'-Carboxybenzalpyruvate	cpd00937
4-Carboxymuconolactone	2c25dho	cpd00938
Toxopyrimidine	4ahmmp	cpd00939
Dihydrostreptomycin 3'alpha,6-bisphosphate	Dihydrostreptomycin 3'alpha,6-bisphosphate	cpd00940
1-Acyl-2-oleoyl-sn-glycero-3-phosphocholine	1-Acyl-2-oleoyl-sn-glycero-3-phosphocholine	cpd00941
1-Amino-1-deoxy-scyllo-inositol 4-phosphate	1-Amino-1-deoxy-scyllo-inositol 4-phosphate	cpd00942
Inositol 1,3,4,5,6-pentakisphosphate	inospp1	cpd00943
2,6-Dichlorophenol-4-(p-benzoquinone imine)	2,6-Dichlorophenol-4-(p-benzoquinone imine)	cpd00944
2-Dehydro-3-deoxy-D-galactonate 6-phosphate	2dh3dgal6p	cpd00945
Undecaprenyl diphospho N-acetyl-glucosamine	unaga	cpd00946
LacCer	LacCer	cpd00947
Isohexenyl-glutaconyl-CoA	Isohexenyl-glutaconyl-CoA	cpd00948
3alpha,7alpha-Dihydroxy-12-oxo-5beta-cholanate	3alpha,7alpha-Dihydroxy-12-oxo-5beta-cholanate	cpd00949
N-Amidino-scyllo-inosamine 4-phosphate	N-Amidino-scyllo-inosamine 4-phosphate	cpd00950
D-5-O-Methyl-2,3,5/4,6-pentahydroxycyclohexanone	D-5-O-Methyl-2,3,5/4,6-pentahydroxycyclohexanone	cpd00951
6-Hydroxypseudooxynicotine	6-Hydroxypseudooxynicotine	cpd00952
1D-1-Guanidino-3-amino-1,3-dideoxy-scyllo-inositol	1D-1-Guanidino-3-amino-1,3-dideoxy-scyllo-inositol	cpd00953
6-hydroxymethyl dihydropterin	6hmhpt	cpd00954
3alpha,7alpha,12alpha-Trihydroxy-5beta-cholestan-26-al	3alpha,7alpha,12alpha-Trihydroxy-5beta-cholestan-26-al	cpd00955
1-(2-carboxyphenylamino)-1-deoxyribulose 5-phosphate	2cpr5p	cpd00956
2,5-Diamino-6-(5'-phosphoribosylamino)-4-pyrimidineone	25drapp	cpd00957
4-Deoxy-beta-D-gluc-4-enuronosyl-(1,3)-N-acetyl-D-galactosamine	4-Deoxy-beta-D-gluc-4-enuronosyl-(1,3)-N-acetyl-D-galactosamine	cpd00958
1,4-beta-D-Galactosyl-(alpha-1,3-L-fucosyl)-N-acetyl-D-glucosaminyl- R	1,4-beta-D-Galactosyl-(alpha-1,3-L-fucosyl)-N-acetyl-D-glucosaminyl- R	cpd00959
PGI2	PGI2	cpd00960
(S)-N-[3-(3,4-Methylenedioxyphenyl)-2-(mercaptomethyl)-1- oxoprolyl]glycine	(S)-N-[3-(3,4-Methylenedioxyphenyl)-2-(mercaptomethyl)-1- oxoprolyl]glycine	cpd00961
(S)-N-[3-(3,4-Methylenedioxyphenyl)-2-(mercaptomethyl)-1-oxoprolyl]- (S)-alanine	(S)-N-[3-(3,4-Methylenedioxyphenyl)-2-(mercaptomethyl)-1-oxoprolyl]- (S)-alanine	cpd00962
(S)-N-[3-(3,4-Methylenedioxyphenyl)-2-(acetylthio)methyl-1- oxoprolyl]glycine benzyl ester	(S)-N-[3-(3,4-Methylenedioxyphenyl)-2-(acetylthio)methyl-1- oxoprolyl]glycine benzyl ester	cpd00963
(S)-N-[3-(3,4-Methylenedioxyphenyl)-2-(acetylthio)methyl-1- oxoprolyl]-(S)-alanine benzyl ester	(S)-N-[3-(3,4-Methylenedioxyphenyl)-2-(acetylthio)methyl-1- oxoprolyl]-(S)-alanine benzyl ester	cpd00964
Hg	Hg	cpd00965
HBr	HBr	cpd00966
NMP	NMP	cpd00970
Na+	na1	cpd00971
XDP	xdp	cpd00972
E-64	E-64	cpd00973
RHg+	RHg+	cpd00975
dIDP	didp	cpd00976
dITP	ditp	cpd00977
dUDP	dudp	cpd00978
dXDP	dXDP	cpd00979
dXTP	dXTP	cpd00980
AA861	AA861	cpd00981
FADH2	fadh2	cpd00982
Mucin	Mucin	cpd00984
NH4OH	nh4oh	cpd00985
PQQH2	pqqh2	cpd00986
X-Trp	X-Trp	cpd00987
3'-AMP	3amp	cpd00988
3'-UMP	3ump	cpd00989
FK506	FK506	cpd00990
Fustin	Fustin	cpd00991
1,2-Ethanediol	1,2-Ethanediol	cpd00992
Hexose	Hexose	cpd00993
I2	I2	cpd00994
Ketose	Ketose	cpd00995
Maleate	male	cpd00996
NH2Mec	NH2Mec	cpd00997
Octane	CPD-148	cpd00998
Phytol	Phytol	cpd00999
Prenol	Prenol	cpd01000
AACOCF3	AACOCF3	cpd01002
Alanine	Alanine	cpd01003
Anisole	Anisole	cpd01004
Arg-OEt	Arg-OEt	cpd01005
Aspirin	CPDIM-6114	cpd01006
Benzene	Benzene	cpd01007
Benzoin	Benzoin	cpd01008
Boc-Asn	Boc-Asn	cpd01009
Borneol	Borneol	cpd01010
Butanal	btal	cpd01011
Cd2+	cd2	cpd01012
Casbene	Casbene	cpd01013
Cocaine	Cocaine	cpd01014
Cyanate	cynt	cpd01015
Cycasin	Cycasin	cpd01016
Cys-Gly	cgly	cpd01017
Cystine	cbs_252	cpd01018
Daphnin	Daphnin	cpd01019
Gallate	ga	cpd01020
Glu-Glu	Glu-Glu	cpd01021
Lactate	lac-R	cpd01022
Loganin	Loganin	cpd01023
Methane	metha	cpd01024
Neamine	Neamine	cpd01025
Ouabain	Ouabain	cpd01026
Oxamate	oxam	cpd01027
Questin	Questin	cpd01028
Base Q	Base Q	cpd01029
Salicin	salcn	cpd01030
Sorbose	srb__L	cpd01031
Tacrine	Tacrine	cpd01032
Toluate	p-tol	cpd01033
Toluol	tol	cpd01034
Tropate	Tropate	cpd01035
Tylosin	Tylosin	cpd01036
Tyr-OEt	Tyr-OEt	cpd01037
Vitexin	Vitexin	cpd01038
Xaa-His	Xaa-His	cpd01039
Xanthan	Xanthan	cpd01040
m-Cresol	m-Cresol	cpd01041
p-Cresol	p-Cresol	cpd01042
Acacetin	Acacetin	cpd01043
Propenal	Propenal	cpd01044
Alizarin	Alizarin	cpd01045
Allysine	Allysine	cpd01046
Apigenin	Apigenin	cpd01047
Arsenate	arsna	cpd01048
Atropine	Atropine	cpd01049
Casein K	Casein K	cpd01051
Chalcone	Chalcone	cpd01052
Chlorate	Chlorate	cpd01053
Chlorite	Chlorite	cpd01054
D-Allose	all__D	cpd01055
D-Apiose	D-Apiose	cpd01056
D-Iditol	D-Iditol	cpd01057
Farnesol	Farnesol	cpd01058
Ferulate	frlt	cpd01059
Flavonol	Flavonol	cpd01060
Geranial	Geranial	cpd01061
Geraniol	Geraniol	cpd01062
Guaiacol	Guaiacol	cpd01063
Indanone	Indanone	cpd01064
Kallidin	Kallidin	cpd01065
L-Iditol	L-Iditol	cpd01066
L-Lyxose	lyx__L	cpd01067
L-Xylose	L-Xylose	cpd01068
Loganate	Loganate	cpd01069
Lupinate	Lupinate	cpd01070
Luteolin	Luteolin	cpd01071
Morphine	Morphine	cpd01072
Naproxen	Naproxen	cpd01073
Nigerose	Nigerose	cpd01074
Pregnane	Pregnane	cpd01075
Ricinine	Ricinine	cpd01076
Scopolin	Scopolin	cpd01077
Selenide	seln	cpd01078
Selenium	Selenium	cpd01079
ocdca	ocdca	cpd01080
Sulindac	Sulindac	cpd01081
Syringin	Syringin	cpd01082
Urethane	Urethane	cpd01084
Viomycin	Viomycin	cpd01085
Warfarin	Warfarin	cpd01086
o-Cresol	o-Cresol	cpd01087
1-Octanal	CPD-371	cpd01088
2-Furoate	2-Furoate	cpd01089
Ethyne	Ethyne	cpd01090
Agaritine	Agaritine	cpd01091
Allantoin	alltn	cpd01092
Amastatin	Amastatin	cpd01093
mAMSA	mAMSA	cpd01094
Androstane	Androstane	cpd01095
Apramycin	Apramycin	cpd01096
Bergapten	Bergapten	cpd01097
Bile acid	bilea	cpd01098
Calcidiol	Calcidiol	cpd01099
Calycosin	Calycosin	cpd01100
Carbamate	Carbamate	cpd01101
Cetraxate	Cetraxate	cpd01102
Cyanamide	Cyanamide	cpd01103
Cytomycin	Cytomycin	cpd01104
D-Apiitol	D-Apiitol	cpd01105
D-Leucine	D-Leucine	cpd01106
Decanoate	dca	cpd01107
Digallate	Digallate	cpd01108
Ephedrine	Ephedrine	cpd01109
VP-16	VP-16	cpd01110
GDPhexose	GDPhexose	cpd01111
Hexanoate	hxa	cpd01113
Hippurate	bgly	cpd01114
Ibuprofen	Ibuprofen	cpd01115
Imidazole	Imidazole	cpd01116
Kievitone	Kievitone	cpd01117
Leupeptin	Leupeptin	cpd01118
Licodione	Licodione	cpd01119
Limonoate	Limonoate	cpd01120
Linamarin	Linamarin	cpd01121
Linoleate	Linoleate	cpd01122
Maleamate	malm	cpd01123
Melatonin	Melatonin	cpd01124
NDP-hexose	NDP-hexose	cpd01125
Nonanoate	nona	cpd01126
Phlorizin	Phlorizin	cpd01128
Phthalate	Phthalate	cpd01129
Phytanate	Phytanate	cpd01130
Piroxicam	Piroxicam	cpd01131
Puromycin	pur	cpd01132
Stachyose	stchs	cpd01133
Tauropine	Tauropine	cpd01134
Taxifolin	Taxifolin	cpd01135
Testolate	Testolate	cpd01136
Thiorphan	Thiorphan	cpd01137
Threonate	Threonate	cpd01138
Tolrestat	Tolrestat	cpd01139
UDP-apiose	UDP-apiose	cpd01140
Vermelone	Vermelone	cpd01141
Vicianose	Vicianose	cpd01142
Vindoline	Vindoline	cpd01143
Xylobiose	cll_399	cpd01144
Z-Arg-Arg	Z-Arg-Arg	cpd01145
Z-Gly-Pro	Z-Gly-Pro	cpd01146
n-Decanol	n-Decanol	cpd01147
2-AminoAMP	2-AminoAMP	cpd01148
Ac-Tyr-OEt	Ac-Tyr-OEt	cpd01149
Acrylamide	aa	cpd01150
Adriamycin	Adriamycin	cpd01151
Aldohexose	Aldohexose	cpd01152
Arene diol	Arene diol	cpd01153
Bz-Arg-OEt	Bz-Arg-OEt	cpd01154
Cadaverine	15dap	cpd01155
Calcitriol	Calcitriol	cpd01156
Chitobiose	chitob	cpd01157
Cilastatin	Cilastatin	cpd01158
Coformycin	Coformycin	cpd01159
Cysteamine	cysam	cpd01160
D-Fuconate	D-Fuconate	cpd01161
D-Nopaline	nop	cpd01162
D-Ornaline	D-Ornaline	cpd01163
D-Rhamnose	rham__D	cpd01164
Destomysin	Destomysin	cpd01165
Diclofenac	Diclofenac	cpd01166
Diflunisal	Diflunisal	cpd01167
Disulfiram	Disulfiram	cpd01168
L-Dopachrome	L-Dopachrome	cpd01169
Ergosterol	ergst	cpd01170
Dulcose	galt	cpd01171
Gibberellin	Gibberellin	cpd01172
Globomycin	Globomycin	cpd01173
Glyceollin	Glyceollin	cpd01174
Glyphosate	Glyphosate	cpd01175
Hesperetin	Hesperetin	cpd01176
Indan-1-ol	Indan-1-ol	cpd01177
Inulobiose	Inulobiose	cpd01178
Elaidinsaure	Elaidinsaure	cpd01179
Isovitexin	Isovitexin	cpd01180
Ketoprofen	Ketoprofen	cpd01181
Kynurenate	Kynurenate	cpd01182
Kynurenine	Kynurenine	cpd01183
L-Fructose	L-Fructose	cpd01184
L-Fuconate	L-Fuconate	cpd01185
L-Fuculose	fcl__L	cpd01186
D-Gulitol	sbt__L	cpd01187
Lanosterol	lanost	cpd01188
Levanbiose	Levanbiose	cpd01189
D-Lombricine	D-Lombricine	cpd01190
Lumichrome	Lumichrome	cpd01191
Mannobiose	Mannobiose	cpd01192
(+)-Medicarpin	(+)-Medicarpin	cpd01193
Mesaconate	Mesaconate	cpd01194
Morphinone	Morphinone	cpd01196
Nebularine	nebari	cpd01197
Neomycin B	Neomycin B	cpd01198
Octylamine	Octylamine	cpd01199
Palatinose	pala	cpd01200
Paromamine	Paromamine	cpd01201
Phloretate	Phloretate	cpd01202
Pinosylvin	Pinosylvin	cpd01203
Piperidine	Piperidine	cpd01204
Psychosine	Psychosine	cpd01205
Pyocyanine	pyo	cpd01206
Quercitrin	Quercitrin	cpd01207
Resorcin	Resorcin	cpd01208
Scopoletin	Scopoletin	cpd01209
Sitosterol	Sitosterol	cpd01210
Thiocyanate	tcynt	cpd01211
Thiopurine	Thiopurine	cpd01212
Triacetate	Triacetate	cpd01213
Vistamycin	Vistamycin	cpd01214
Vomifoliol	Vomifoliol	cpd01215
Vomilenine	Vomilenine	cpd01216
Xanthosine	xtsn	cpd01217
d-Borneol	d-Borneol	cpd01218
Carvol	Carvol	cpd01220
(S)-Acetoin	(S)-Acetoin	cpd01221
1,4-Lactone	1,4-Lactone	cpd01222
2-Butenoate	2-Butenoate	cpd01223
trans-2-Hydroxycinnamate	trans-2-Hydroxycinnamate	cpd01224
Aculeacin A	Aculeacin A	cpd01225
Acylcholine	Acylcholine	cpd01226
Albendazole	Albendazole	cpd01227
Aldosterone	Aldosterone	cpd01228
Arene oxide	Arene oxide	cpd01229
Arylmercury	Arylmercury	cpd01230
Benzamidine	Benzamidine	cpd01231
Benzenediol	Benzenediol	cpd01232
CDP-abequose	CDP-abequose	cpd01233
Campesterol	Campesterol	cpd01234
Kepone	Kepone	cpd01235
Chlorophyll	Chlorophyll	cpd01236
Choloyl-CoA	Choloyl-CoA	cpd01237
Columbamine	Columbamine	cpd01238
D-Erythrose	D-Erythrose	cpd01239
D-Glucoside	D-Glucoside	cpd01240
D-Norvaline	D-Norvaline	cpd01241
Thyminose	drib	cpd01242
Desmosterol	Desmosterol	cpd01243
Discadenine	Discadenine	cpd01244
GTP-gamma-S	GTP-gamma-S	cpd01245
Mucic acid	Mucic acid	cpd01246
Glucosamine	gluam	cpd01247
Haloacetate	Haloacetate	cpd01248
Haloperidol	Haloperidol	cpd01249
Heptadecane	Heptadecane	cpd01250
Homocystine	Homocystine	cpd01251
Hyponitrite	Hyponitrite	cpd01252
Indoleamine	Indoleamine	cpd01253
Isoorientin	Isoorientin	cpd01254
Kanamycin A	Kanamycin A	cpd01255
Kanamycin C	Kanamycin C	cpd01256
L-Galactose	L-Galactose	cpd01257
L-Norvaline	L-Norvaline	cpd01258
T4	T4	cpd01259
Lauroyl-CoA	ddcoa	cpd01260
Leu-Gly-Pro	Leu-Gly-Pro	cpd01261
Amylotriose	malttr	cpd01262
Nitroethane	Nitroethane	cpd01263
Octadecanal	ocdcal	cpd01264
Orsellinate	Orsellinate	cpd01265
Pentalenene	Pentalenene	cpd01266
Valeramide	Valeramide	cpd01267
Pravastatin	Pravastatin	cpd01268
2-Propanol	2ppoh	cpd01269
FMNH2	fmnh2	cpd01270
Rifamycin B	Rifamycin B	cpd01271
Rifamycin O	Rifamycin O	cpd01272
Rosmarinate	Rosmarinate	cpd01273
Scopolamine	Scopolamine	cpd01274
Secologanin	Secologanin	cpd01275
Stipitatate	Stipitatate	cpd01276
Streptamine	Streptamine	cpd01277
Taxiphyllin	Taxiphyllin	cpd01278
Thioacetate	Thioacetate	cpd01279
Trichodiene	Trichodiene	cpd01280
Trithionate	Trithionate	cpd01281
Xanthoaphin	Xanthoaphin	cpd01282
Methoxsalen	Methoxsalen	cpd01283
Zopolrestat	Zopolrestat	cpd01284
(+)-Sabinone	(+)-Sabinone	cpd01285
(-)-Sympatol	(-)-Sympatol	cpd01286
(R)-Vicianin	(R)-Vicianin	cpd01287
1,4-Dithiane	1,4-Dithiane	cpd01288
2-Iodophenol	2-Iodophenol	cpd01289
2-Undecanone	2-Undecanone	cpd01290
3-Oxosteroid	3-Oxosteroid	cpd01291
4-Oxoproline	4-Oxoproline	cpd01292
5-Oxoproline	5oxpro	cpd01293
2-Oxepanone	2-Oxepanone	cpd01294
7-Oxosteroid	7-Oxosteroid	cpd01295
ADP-D-ribose	ADP-D-ribose	cpd01296
Glyceride	Glyceride	cpd01297
Aminoacetone	aact	cpd01298
Aralkylamine	Aralkylamine	cpd01299
Asparagusate	Asparagusate	cpd01300
Biotin amide	Biotin amide	cpd01301
Biotinyl-CoA	Biotinyl-CoA	cpd01302
Bleomycin B2	Bleomycin B2	cpd01303
Camptothecin	Camptothecin	cpd01304
Cucurbitacin	Cucurbitacin	cpd01305
Cycloartenol	Cycloartenol	cpd01306
D-Lyxitol	D-Lyxitol	cpd01307
D-Asparagine	D-Asparagine	cpd01308
D-Hamamelose	D-Hamamelose	cpd01309
Daunomycin	Daunomycin	cpd01310
Dethiobiotin	dtbt	cpd01311
Disaccharide	Disaccharide	cpd01312
Abomacetin	Abomacetin	cpd01313
Ferrocyanide	Ferrocyanide	cpd01314
Galactolipid	Galactolipid	cpd01315
Gentamicin A	Gentamicin A	cpd01316
Geranoyl-CoA	Geranoyl-CoA	cpd01317
Glycocholate	Glycocholate	cpd01318
Homoarginine	Homoarginine	cpd01319
Hygromycin B	Hygromycin B	cpd01320
Indometacin	Indometacin	cpd01321
Isoflavanone	Isoflavanone	cpd01322
Ketoaldehyde	Ketoaldehyde	cpd01323
L-Histidinal	cbs_412	cpd01324
L-Lysinamide	L-Lysinamide	cpd01325
L-Lysyl-tRNA	lystrna	cpd01326
L-Norleucine	L-Norleucine	cpd01327
L-Rhamnonate	L-Rhamnonate	cpd01328
Maltohexaose	malthx	cpd01329
Methotrexate	Methotrexate	cpd01330
Naphthazarin	Naphthazarin	cpd01331
Nocardicin A	Nocardicin A	cpd01332
Nonanoyl-CoA	Nonanoyl-CoA	cpd01333
Obtusifoliol	Obtusifoliol	cpd01334
Octanoyl-CoA	occoa	cpd01335
Okadaic acid	Okadaic acid	cpd01336
Romicil	Romicil	cpd01337
Pentadecanal	ptdcal	cpd01338
2-Pentanone	2-Pentanone	cpd01339
Picolinamide	Picolinamide	cpd01340
Piperitenone	Piperitenone	cpd01341
Pregnenolone	Pregnenolone	cpd01342
Pyrazinamide	Pyrazinamide	cpd01343
Secologanate	Secologanate	cpd01344
Taurocyamine	Taurocyamine	cpd01345
Thalassemine	Thalassemine	cpd01346
Thiocysteine	Thiocysteine	cpd01347
Tolylacetate	Tolylacetate	cpd01348
Tos-Ph-CH2Cl	Tos-Ph-CH2Cl	cpd01349
Trimethoprim	Trimethoprim	cpd01350
Ubiquinone-9	ubq9	cpd01351
Undecaprenol	udcp	cpd01352
Xanthommatin	Xanthommatin	cpd01353
beta-Lactose	cll_395	cpd01354
beta-Maltose	cll_396	cpd01355
(R)-Amygdalin	(R)-Amygdalin	cpd01356
(R)-Mandelate	(R)-Mandelate	cpd01357
(S)-Mandelate	(S)-Mandelate	cpd01358
16-Oxosteroid	16-Oxosteroid	cpd01359
o-Aminophenol	o-Aminophenol	cpd01360
2-Nitrophenol	2-Nitrophenol	cpd01361
3-Ethylmalate	3-Ethylmalate	cpd01362
3-Oxalomalate	3-Oxalomalate	cpd01363
5'-Nucleotide	5'-Nucleotide	cpd01364
5'-Oxoinosine	5'-Oxoinosine	cpd01365
Acetoxime	Acetoxime	cpd01366
Acetylcholine	Acetylcholine	cpd01367
Vinyl cyanide	Vinyl cyanide	cpd01368
2-Propen-1-ol	2-Propen-1-ol	cpd01369
Aristolochene	Aristolochene	cpd01370
Aspulvinone E	Aspulvinone E	cpd01371
Aspulvinone G	Aspulvinone G	cpd01372
Aspulvinone H	Aspulvinone H	cpd01373
Benzimidazole	Benzimidazole	cpd01374
Blasticidin S	Blasticidin S	cpd01375
Cellotetraose	Cellotetraose	cpd01376
Choline ester	Choline ester	cpd01377
CoA-disulfide	CoA-disulfide	cpd01378
Cyanopyrazine	Cyanopyrazine	cpd01379
Cyclic ketone	Cyclic ketone	cpd01380
Cyclopentanol	Cyclopentanol	cpd01381
Cytochrome c1	Cytochrome c1	cpd01382
D-Erythrulose	D-Erythrulose	cpd01383
D-Mannuronate	D-Mannuronate	cpd01384
Deoxycytosine	Deoxycytosine	cpd01385
Dihydrozeatin	Dihydrozeatin	cpd01386
Farnesoyl-CoA	Farnesoyl-CoA	cpd01387
Gentamicin C2	Gentamicin C2	cpd01388
Gibberellin 19	Gibberellin 19	cpd01389
Gibberellin 20	Gibberellin 20	cpd01390
Glycylglycine	glygly	cpd01391
Hydroxyindole	Hydroxyindole	cpd01392
Icosanoyl-CoA	Icosanoyl-CoA	cpd01393
Indolelactate	Indolelactate	cpd01394
L-Erythrulose	L-Erythrulose	cpd01395
Daturine	Daturine	cpd01396
Laminariaceae	Laminariaceae	cpd01397
Linoleoyl-CoA	Linoleoyl-CoA	cpd01398
Maltotetraose	maltttr	cpd01399
Phenylalanine	cll_481	cpd01400
Vitamin K1	Vitamin K1	cpd01401
Phytanoyl-CoA	Phytanoyl-CoA	cpd01402
Prostanoic acid	Prostanoic acid	cpd01403
Pseudotropine	Pseudotropine	cpd01404
Pseudouridine	Pseudouridine	cpd01405
Raucaffricine	Raucaffricine	cpd01406
Volemulose	Volemulose	cpd01407
Aminourea	Aminourea	cpd01408
Spectinomycin	Sptmyn	cpd01409
Staurosporine	Staurosporine	cpd01410
Stipitatonate	Stipitatonate	cpd01411
Streptonigrin	Streptonigrin	cpd01412
Styrene oxide	Styrene oxide	cpd01413
Tetrathionate	tttnt	cpd01414
Thioglycolate	thiog	cpd01415
Tos-Arg-CH2Cl	Tos-Arg-CH2Cl	cpd01416
TPCK	TPCK	cpd01417
TSH	TSH	cpd01418
Ureidoglycine	cbs_184	cpd01419
beta-Carotene	beta-Carotene	cpd01420
beta-D-Fucose	bfru__D	cpd01421
beta-D-Xylose	cll_392	cpd01422
dTDP-galactose	dTDP-galactose	cpd01423
(2S)-Flavanone	(2S)-Flavanone	cpd01424
(S)-Mevalonate	(S)-Mevalonate	cpd01425
(+)-Reticuline	(+)-Reticuline	cpd01426
(S)-Scoulerine	(S)-Scoulerine	cpd01427
1,2-Campholide	1,2-Campholide	cpd01429
11-cis-Retinal	11-cis-Retinal	cpd01430
2-Glyceride	2-Glyceride	cpd01431
2-Methylserine	2-Methylserine	cpd01432
2-Nitropropane	n2ppn	cpd01433
2-Oxophytanate	2-Oxophytanate	cpd01434
3-Oxohexanoate	3-Oxohexanoate	cpd01435
3-Propylmalate	3-Propylmalate	cpd01436
p-Chlorophenol	p-Chlorophenol	cpd01437
p-Nitroaniline	p-Nitroaniline	cpd01438
5-Oxohexanoate	5-Oxohexanoate	cpd01440
Acetyl-maltose	acmalt	cpd01441
Acetylagmatine	Acetylagmatine	cpd01442
Acetylpyruvate	Acetylpyruvate	cpd01443
Allocryptopine	Allocryptopine	cpd01444
Angiotonin	Angiotonin	cpd01445
Aromatic amine	Aromatic amine	cpd01446
Benzoylformate	benz	cpd01447
Boc-Asn-OPhNO2	Boc-Asn-OPhNO2	cpd01448
Chlorophyllide	Chlorophyllide	cpd01449
Corticosterone	Corticosterone	cpd01450
Cycloeucalenol	Cycloeucalenol	cpd01451
D-Ribosyl-base	D-Ribosyl-base	cpd01452
D-threo-Aldose	D-threo-Aldose	cpd01453
Dihydrolipoate	Dihydrolipoate	cpd01454
Formylpyruvate	Formylpyruvate	cpd01455
Geissoschizine	Geissoschizine	cpd01456
Glucotropeolin	Glucotropeolin	cpd01457
Glycerose	Glycerose	cpd01458
Glycyl-leucine	Glycyl-leucine	cpd01459
Hydroxysteroid	Hydroxysteroid	cpd01460
Isomaltotriose	Isomaltotriose	cpd01461
Isophenoxazine	Isophenoxazine	cpd01462
Isopimpinellin	Isopimpinellin	cpd01463
Leukotriene B4	Leukotriene B4	cpd01464
Leukotriene C4	Leukotriene C4	cpd01465
Maleylpyruvate	Maleylpyruvate	cpd01466
Mefenamic acid	Mefenamic acid	cpd01467
Methylmalonate	mmal	cpd01468
Mononucleotide	Mononucleotide	cpd01469
N-Acetylisatin	N-Acetylisatin	cpd01470
Arylsulfate	PHENYLSULFATE	cpd01471
Phenoxyacetate	Phenoxyacetate	cpd01472
Phloroglucinol	Phloroglucinol	cpd01473
Plastoquinal-9	Plastoquinal-9	cpd01474
Plastoquinol-1	Plastoquinol-1	cpd01475
Protoporphyrin	ppp9	cpd01476
Pyruvate oxime	Pyruvate oxime	cpd01477
Steryl sulfate	Steryl sulfate	cpd01478
Testolactone	Testolactone	cpd01479
Thromboxane A2	Thromboxane A2	cpd01480
UDP-L-rhamnose	UDP-L-rhamnose	cpd01481
UDP-glucosamine	ugam	cpd01482
Veratraldehyde	Veratraldehyde	cpd01483
Z-Phe-Phe-CHN2	Z-Phe-Phe-CHN2	cpd01484
Z-Tyr-Leu-NHOH	Z-Tyr-Leu-NHOH	cpd01485
alpha-D-Lyxose	alpha-D-Lyxose	cpd01486
alpha-D-Xylose	alpha-D-Xylose	cpd01487
alpha-Santonin	alpha-Santonin	cpd01488
beta-Alanopine	beta-Alanopine	cpd01489
beta-D-Mannose	beta-D-Mannose	cpd01490
(+)-cis-Sabinol	(+)-cis-Sabinol	cpd01491
Glutaconic acid	Glutaconic acid	cpd01492
1-Methyladenine	1-Methyladenine	cpd01493
10-Oxodecanoate	10-Oxodecanoate	cpd01494
Dehydroalanine	Dehydroalanine	cpd01495
o-Aminomuconate	amuco	cpd01496
2-Cyanopyridine	2-Cyanopyridine	cpd01497
Maleylacetate	Maleylacetate	cpd01498
2-Methylbutanal	2mbald	cpd01499
2-Methylcholine	2-Methylcholine	cpd01500
2-Methylcitrate	2mcit	cpd01501
Citraconate	Citraconate	cpd01502
2-Naphthylamine	2-Naphthylamine	cpd01503
3-Aminopropanal	aproa	cpd01504
3-Methylguanine	3-Methylguanine	cpd01505
3-Nitroacrylate	3-Nitroacrylate	cpd01506
3-Oxoadipyl-CoA	oxadpcoa	cpd01507
3-Oxopentanoate	3-Oxopentanoate	cpd01508
4-Cyanopyridine	4-Cyanopyridine	cpd01509
4-Nitrocatechol	4-Nitrocatechol	cpd01510
4-Sulfobenzoate	4-Sulfobenzoate	cpd01511
5-Oxo-D-proline	5-Oxo-D-proline	cpd01512
5-Valerolactone	5-Valerolactone	cpd01514
7-Methyladenine	7-Methyladenine	cpd01515
7-Methylguanine	7-Methylguanine	cpd01516
8-Oxocoformycin	8-Oxocoformycin	cpd01517
Anthranilyl-CoA	Anthranilyl-CoA	cpd01518
Arachidonyl-CoA	Arachidonyl-CoA	cpd01519
Benzoylagmatine	Benzoylagmatine	cpd01520
Castanospermine	Castanospermine	cpd01521
Choloyl-taurine	Choloyl-taurine	cpd01522
D-2-Aminobutyrate	D-2-Aminobutyrate	cpd01523
D-Chondrosamine	D-Chondrosamine	cpd01524
D-Glucose oxime	D-Glucose oxime	cpd01525
D-Phenylalanine	D-Phenylalanine	cpd01526
D-Xylonolactone	D-Xylonolactone	cpd01527
Pentostatin	Pentostatin	cpd01528
Deoxynucleoside	Deoxynucleoside	cpd01529
Dichloromethane	Dichloromethane	cpd01530
Ethyl sulfide	Ethyl sulfide	cpd01531
Digalacturonate	Digalacturonate	cpd01532
Dihydrocoumarin	Dihydrocoumarin	cpd01533
1-Dodecanol	1-Dodecanol	cpd01534
Dodecanal	ddcal	cpd01535
GDP-L-galactose	GDP-L-galactose	cpd01536
Enoxolone	Enoxolone	cpd01537
Glycyrrhizin	Glycyrrhizin	cpd01538
Tartronic acid	Tartronic acid	cpd01539
Isopiperitenone	Isopiperitenone	cpd01540
L-Carnitinamide	L-Carnitinamide	cpd01541
Latia luciferin	Latia luciferin	cpd01543
Methylguanidine	Methylguanidine	cpd01544
Methylitaconate	Methylitaconate	cpd01545
N-Acetyldiamine	N-Acetyldiamine	cpd01546
Acetylindoxyl	Acetylindoxyl	cpd01547
N-Methylaniline	N-Methylaniline	cpd01548
Phenyldiazane	Phenyldiazane	cpd01549
Phosphocreatine	Phosphocreatine	cpd01550
Phosphoramidate	Phosphoramidate	cpd01551
PGF2b	PGF2b	cpd01552
Saligenin	2hxmp	cpd01553
Sinapyl alcohol	Sinapyl alcohol	cpd01554
Tolmetin sodium	Tolmetin sodium	cpd01555
UDP-L-iduronate	UDP-L-iduronate	cpd01556
3-Butenoyl-CoA	3-Butenoyl-CoA	cpd01557
Xanthopterin-B2	Xanthopterin-B2	cpd01558
Z-Arg-Arg-NHMec	Z-Arg-Arg-NHMec	cpd01559
beta-Alanyl-CoA	beta-Alanyl-CoA	cpd01560
beta-L-Rhamnose	beta-L-Rhamnose	cpd01562
trans-Aconitate	acon-T	cpd01563
Norephedrine	Norephedrine	cpd01564
Fenchyl alcohol	Fenchyl alcohol	cpd01565
(2S)-Flavan-4-ol	(2S)-Flavan-4-ol	cpd01566
(R)-Allantoin	(R)-Allantoin	cpd01567
1,2-Benzoquinone	1,2-Benzoquinone	cpd01569
2',3'-Cyclic AMP	23camp	cpd01570
2',3'-Cyclic CMP	23ccmp	cpd01571
2',3'-Cyclic UMP	23cump	cpd01572
(S)-2-Aminobutanoate	(S)-2-Aminobutanoate	cpd01573
2-Chlorobenzoate	2-Chlorobenzoate	cpd01574
2-Fluorobenzoate	2-Fluorobenzoate	cpd01575
2-Hydroxyadipate	2-Hydroxyadipate	cpd01576
2-Oxosuccinamate	2-Oxosuccinamate	cpd01577
3-Ethoxybenzoate	3-Ethoxybenzoate	cpd01578
3-Fluorobenzoate	3-Fluorobenzoate	cpd01579
3-Methyloxindole	3-Methyloxindole	cpd01580
3-Oxododecanoate	3oxdd	cpd01581
4-Chlorobenzoate	4-Chlorobenzoate	cpd01582
4-Fluorobenzoate	4-Fluorobenzoate	cpd01583
p-Aminophenol	p-Aminophenol	cpd01584
Isohexanal	Isohexanal	cpd01585
4-Chlorocatechol	4-Chlorocatechol	cpd01586
5-Methylcytosine	5mcsn	cpd01587
Epsilcapramine	6ax	cpd01588
6-Hydroxymellein	6-Hydroxymellein	cpd01589
Mercaptopurine	Mercaptopurine	cpd01590
6-Methoxymellein	6-Methoxymellein	cpd01591
CH3-N(O)=N-CH2OH	CH3-N(O)=N-CH2OH	cpd01594
Styrylcarbinol	Styrylcarbinol	cpd01595
Cyclohex-2-enone	Cyclohex-2-enone	cpd01596
Demethylmacrocin	Demethylmacrocin	cpd01597
Formyl phosphate	Formyl phosphate	cpd01598
Glutaconyl-1-CoA	GLUTACONYL-COA	cpd01599
Heptopyranosides	Heptopyranosides	cpd01600
Hydroxycobalamin	Hydroxycobalamin	cpd01601
Hypotaurocyamine	Hypotaurocyamine	cpd01602
Isobutyronitrile	Isobutyronitrile	cpd01603
Isonicotineamide	Isonicotineamide	cpd01604
L-Glycerose	Lglyald	cpd01605
L-Homocitrulline	L-Homocitrulline	cpd01606
L-Rhamnofuranose	L-Rhamnofuranose	cpd01607
L-Selenocysteine	scys__L	cpd01608
N-Ethylmaleimide	N-Ethylmaleimide	cpd01609
N-Methyltyramine	N-Methyltyramine	cpd01610
N6-Acyl-L-lysine	N6-Acyl-L-lysine	cpd01611
Nonane-4,6-dione	Nonane-4,6-dione	cpd01612
Pent-2-enoyl-CoA	Pent-2-enoyl-CoA	cpd01613
Perillyl alcohol	Perillyl alcohol	cpd01614
Phenolic steroid	Phenolic steroid	cpd01615
Benzenediamine	Benzenediamine	cpd01616
1-Phenylethylamine	1-Phenylethylamine	cpd01617
1,3-Propanediol	1,3-Propanediol	cpd01618
Sabinene hydrate	Sabinene hydrate	cpd01619
Precorrin 2	pre2	cpd01620
T3	T3	cpd01621
Trimetaphosphate	tmp	cpd01622
UDP-galactosamine	UDP-galactosamine	cpd01623
Uroporphyrin III	Uroporphyrin III	cpd01624
Xanthurenate	Xanthurenate	cpd01625
alpha-D-Lyxoside	alpha-D-Lyxoside	cpd01626
alpha-L-Rhamnose	alpha-L-Rhamnose	cpd01627
Vitamin E	Vitamin E	cpd01628
beta-L-Arabinose	cll_394	cpd01629
cis,cis-Muconate	muc	cpd01630
gamma-Tocopherol	gamma-Tocopherol	cpd01631
(+)-trans-Pulegol	(+)-trans-Pulegol	cpd01632
L-beta-Leucine	L-beta-Leucine	cpd01634
(Ac)2-L-Lys-D-Ala	(Ac)2-L-Lys-D-Ala	cpd01635
(R)-2-Ethylmalate	(R)-2-Ethylmalate	cpd01636
1-Methyladenosine	1-Methyladenosine	cpd01637
2'-Hydroxydaidzein	2'-Hydroxydaidzein	cpd01638
2,4-Dinitrophenol	2,4-Dinitrophenol	cpd01639
2-Butyne-1,4-diol	2-Butyne-1,4-diol	cpd01640
2-Ethyl-1-hexanol	2-Ethyl-1-hexanol	cpd01641
2-Biphenylol	2-Biphenylol	cpd01642
2-Hydroxymuconate	2hmc	cpd01644
2-Pyridone	2-Pyridone	cpd01645
2-Isopropylmalate	3c3hmp	cpd01646
2-Phenylacetamide	pad	cpd01647
3',5'-Cyclic dGMP	3',5'-Cyclic dGMP	cpd01648
3'-Ribonucleotide	3'-Ribonucleotide	cpd01649
3-(ADP)-glycerate	3-(ADP)-glycerate	cpd01650
L-3-Cyanoalanine	L-3-Cyanoalanine	cpd01651
3-Dehydroecdysone	3-Dehydroecdysone	cpd01652
3-Fumarylpyruvate	3-Fumarylpyruvate	cpd01653
3-Iodo-L-tyrosine	3-Iodo-L-tyrosine	cpd01654
3-Nitropropanoate	3-Nitropropanoate	cpd01655
3-Oxohexobarbital	3-Oxohexobarbital	cpd01656
4-Aminosalicylate	4-Aminosalicylate	cpd01657
4-Anisic acid	4-Anisic acid	cpd01658
5'-Ribonucleotide	5'-Ribonucleotide	cpd01659
Isorhodeose	Isorhodeose	cpd01660
3-Phenylcatechol	3-Phenylcatechol	cpd01661
Butanoylphosphate	butpi	cpd01662
Chenodiol	Chenodiol	cpd01663
Cholesterol ester	Cholesterol ester	cpd01664
D-O-Phosphoserine	pser__D	cpd01665
Dehydrovomifoliol	Dehydrovomifoliol	cpd01666
Dimethyl selenide	Dimethyl selenide	cpd01667
17alpha-Estradiol	17alpha-Estradiol	cpd01668
Estrone 3-sulfate	Estrone 3-sulfate	cpd01669
Fenprofen calcium	Fenprofen calcium	cpd01670
Glycerone sulfate	Glycerone sulfate	cpd01671
2-(2-Aminoethyl)indole	2-(2-Aminoethyl)indole	cpd01672
Kievitone hydrate	Kievitone hydrate	cpd01673
Luciferyl sulfate	Luciferyl sulfate	cpd01674
Methylmalonyl-CoA	Methylmalonyl-CoA	cpd01675
N-Acetylarylamine	N-Acetylarylamine	cpd01676
N-Acetylimidazole	N-Acetylimidazole	cpd01677
N-Feruloylglycine	N-Feruloylglycine	cpd01678
N-Methylhydantoin	N-Methylhydantoin	cpd01679
N1-Acetylspermine	N1sprm	cpd01680
Neryl diphosphate	Neryl diphosphate	cpd01681
O-Acetylcarnitine	acrn	cpd01682
O-Feruloylquinate	O-Feruloylquinate	cpd01683
O-Phosphoviomycin	O-Phosphoviomycin	cpd01684
PCP	PCP	cpd01685
Perillaldehyde	Perillaldehyde	cpd01686
Phenoxyacetyl-CoA	Phenoxyacetyl-CoA	cpd01687
Phenylgalactoside	Phenylgalactoside	cpd01688
Propionylagmatine	Propionylagmatine	cpd01689
Pyrimidodiazepine	Pyrimidodiazepine	cpd01690
Retinol palmitate	Retinol palmitate	cpd01691
Steroid O-sulfate	Steroid O-sulfate	cpd01692
6-Phosphosucrose	suc6p	cpd01693
Taurolithocholate	Taurolithocholate	cpd01694
Myristoyl-CoA	tdcoa	cpd01695
Thien-2-ylacetate	Thien-2-ylacetate	cpd01696
Tolylacetonitrile	Tolylacetonitrile	cpd01697
alpha-L-Arabinose	alpha-L-Arabinose	cpd01698
(E,E)-Piperoyl-CoA	(E,E)-Piperoyl-CoA	cpd01699
D-Citramalate	D-Citramalate	cpd01700
S-Citramalate	S-Citramalate	cpd01701
(S)-Mandelonitrile	(S)-Mandelonitrile	cpd01702
1,4-Naphthoquinone	1,4-Naphthoquinone	cpd01703
13-Hydroxylupinine	13-Hydroxylupinine	cpd01704
2,3-Dimethylmalate	2,3-Dimethylmalate	cpd01705
2,4-Dichlorophenol	2,4-Dichlorophenol	cpd01706
2-Deoxystreptamine	2-Deoxystreptamine	cpd01707
2-Deoxystreptidine	2-Deoxystreptidine	cpd01708
2-Hydroxyglutarate	2-Hydroxyglutarate	cpd01709
2-Isopropylmaleate	2ippm	cpd01710
Isobutyrate	Isobutyrate	cpd01711
20-Hydroxyecdysone	20-Hydroxyecdysone	cpd01712
3-Chloro-D-alanine	3-Chloro-D-alanine	cpd01713
3-Chloro-L-alanine	3-Chloro-L-alanine	cpd01714
3-Dehydrocarnitine	3-Dehydrocarnitine	cpd01715
3-Dehydroshikimate	3dhsk	cpd01716
3-Fluoro-D-alanine	3-Fluoro-D-alanine	cpd01717
3-Methoxytropolone	3-Methoxytropolone	cpd01718
Isoamylamine	Isoamylamine	cpd01719
3-Ureidopropanoate	cala	cpd01720
4,5-Leukotriene A4	4,5-Leukotriene A4	cpd01721
p-Coumaryl alcohol	p-Coumaryl alcohol	cpd01722
4-Guanidinobutanal	gdbtal	cpd01723
4-Hydroxy-2-butynal	4-Hydroxy-2-butynal	cpd01724
5-Dehydroshikimate	cll_73	cpd01725
6-Acetyl-D-glucose	acglc__D	cpd01726
Pimelate	pime	cpd01727
6-Methylsalicylate	6-Methylsalicylate	cpd01728
Aldoxime	Aldoxime	cpd01729
Acetone cyanhydrin	Acetone cyanhydrin	cpd01730
Benzyl thiocyanate	Benzyl thiocyanate	cpd01731
Bromochloromethane	Bromochloromethane	cpd01732
Ferulaldehyde	confald	cpd01733
D-Galactono-1,5-lactone	D-Galactono-1,5-lactone	cpd01734
Glucurone	glcurn	cpd01735
Deacetoxyvindoline	Deacetoxyvindoline	cpd01736
Deoxyribonolactone	Deoxyribonolactone	cpd01737
Dihydrobiochanin A	Dihydrobiochanin A	cpd01738
Dimethyl telluride	Dimethyl telluride	cpd01739
Dodecanedioic acid	Dodecanedioic acid	cpd01740
ddca	ddca	cpd01741
Ecdysone palmitate	Ecdysone palmitate	cpd01742
Cerebroside	Cerebroside	cpd01743
Glycerol monoester	Glycerol monoester	cpd01744
Heteropyrithiamine	Heteropyrithiamine	cpd01745
Hexose-1,5-lactone	Hexose-1,5-lactone	cpd01746
Indole-3-acetamide	iad	cpd01747
L-Citrulline ester	L-Citrulline ester	cpd01748
N-Formylkynurenine	Lfmkynr	cpd01749
L-Serine O-sulfate	L-Serine O-sulfate	cpd01750
Methyl sulfate	Methyl sulfate	cpd01751
Mucus glycoprotein	Mucus glycoprotein	cpd01752
N-Acetoxyarylamine	N-Acetoxyarylamine	cpd01753
N-Acetyl-L-leucine	N-Acetyl-L-leucine	cpd01754
N-Acetylhexosamine	N-Acetylhexosamine	cpd01755
N-Acetylmethionine	N-Acetylmethionine	cpd01756
N-Acetylmuramate	acmum	cpd01757
N-Acetylputrescine	aprut	cpd01758
N-Acyl-L-aspartate	N-Acyl-L-aspartate	cpd01759
N-Acyl-L-glutamine	N-Acyl-L-glutamine	cpd01760
N-Feruloyltyramine	N-Feruloyltyramine	cpd01761
Formiminoglycine	Formiminoglycine	cpd01762
N-Hydroxyarylamine	N-Hydroxyarylamine	cpd01763
N-Methyl-L-alanine	N-Methyl-L-alanine	cpd01764
N-Methylhexanamide	N-Methylhexanamide	cpd01765
N-Methylputrescine	N-Methylputrescine	cpd01766
N-Methylpyridinium	N-Methylpyridinium	cpd01767
N3'-Acetylneomycin	N3'-Acetylneomycin	cpd01768
N4-Phosphoagmatine	N4-Phosphoagmatine	cpd01769
N6-Acetyl-L-lysine	N6-Acetyl-L-lysine	cpd01770
N6-Methyl-L-lysine	N6-Methyl-L-lysine	cpd01771
Succinylbenzoate	sucbz	cpd01772
Phenylphosphate	Phenylphosphate	cpd01773
Phenylethanolamine	Phenylethanolamine	cpd01774
Phosphoribosyl-ATP	prbatp	cpd01775
Photinus luciferin	Photinus luciferin	cpd01776
Phosphoribosyl-AMP	prbamp	cpd01777
Psychosine sulfate	Psychosine sulfate	cpd01778
Reduced-(S)-usnate	Reduced-(S)-usnate	cpd01779
Sinapoyltartronate	Sinapoyltartronate	cpd01780
Triacetate lactone	Triacetate lactone	cpd01781
D-Xylono-1,4-lactone	D-Xylono-1,4-lactone	cpd01782
alpha-Pinene-oxide	alpha-Pinene-oxide	cpd01783
enol-Phenylpyruvate	enol-Phenylpyruvate	cpd01784
(+)-Pseudoephedrine	(+)-Pseudoephedrine	cpd01785
(R)-Ureidoglycolate	(R)-Ureidoglycolate	cpd01786
1,2-Dihydrosantonin	1,2-Dihydrosantonin	cpd01787
10-Hydroxydecanoate	10-Hydroxydecanoate	cpd01788
Dihydroxyindole	Dihydroxyindole	cpd01789
Diketopiperazine	Diketopiperazine	cpd01790
2-Acetamidofluorene	2-Acetamidofluorene	cpd01791
2-Dehydro-D-glucose	2-Dehydro-D-glucose	cpd01792
2,5-diketo-D-gluconate	25dkglcn	cpd01793
2-Deoxy-D-galactose	2-Deoxy-D-galactose	cpd01794
2-Deoxy-D-gluconate	2dglcn	cpd01795
2-Deoxy-L-arabinose	2-Deoxy-L-arabinose	cpd01796
2-Fluorobenzoyl-CoA	2-Fluorobenzoyl-CoA	cpd01797
3-Hydroxy-vitamin K	3-Hydroxy-vitamin K	cpd01798
Isobutylamine	Isobutylamine	cpd01799
2-trans-Hexadecenal	2-trans-Hexadecenal	cpd01800
3,4-Dichloroaniline	3,4-Dichloroaniline	cpd01801
3-Fluorobenzoyl-CoA	3-Fluorobenzoyl-CoA	cpd01802
2-Hydroxy-vitamin K	2-Hydroxy-vitamin K	cpd01803
3-Hydroxykynurenine	3hykyn	cpd01804
3-Methyleneoxindole	3-Methyleneoxindole	cpd01805
3-Oxo-5beta-steroid	3-Oxo-5beta-steroid	cpd01806
3-Phosphonopyruvate	3pop	cpd01807
3beta-Hydroxysterol	3beta-Hydroxysterol	cpd01808
4,5-Dioxopentanoate	4,5-Dioxopentanoate	cpd01809
4-Aminobutanoyl-CoA	4-Aminobutanoyl-CoA	cpd01810
4-Fluorobenzoyl-CoA	4-Fluorobenzoyl-CoA	cpd01811
p-Nitroacetophenone	p-Nitroacetophenone	cpd01812
5-Hydroxypentanoate	5-Hydroxypentanoate	cpd01813
5-Oxoprolyl-peptide	5-Oxoprolyl-peptide	cpd01814
8-Hydroxykaempferol	8-Hydroxykaempferol	cpd01815
Acenaphthoquinone	Acenaphthoquinone	cpd01816
Acetylblasticidin S	Acetylblasticidin S	cpd01817
Albendazole S-oxide	Albendazole S-oxide	cpd01818
Alditol 6-phosphate	Alditol 6-phosphate	cpd01819
Anhydrotetracycline	Anhydrotetracycline	cpd01820
Ascorbate 2-sulfate	Ascorbate 2-sulfate	cpd01821
Hydroxyquinol	Hydroxyquinol	cpd01822
Chlordecone alcohol	Chlordecone alcohol	cpd01823
Cortell	Cortell	cpd01824
Cortisol 21-sulfate	Cortisol 21-sulfate	cpd01825
Dicopac	Dicopac	cpd01826
Cylamic acid	Cylamic acid	cpd01827
Cypridina luciferin	Cypridina luciferin	cpd01828
D-Glucose 6-sulfate	D-Glucose 6-sulfate	cpd01829
D-Phe-Pro-Arg-CH2Cl	D-Phe-Pro-Arg-CH2Cl	cpd01830
4-Imidazoleacetate	imzac	cpd01831
L-Lysine 1,6-lactam	L-Lysine 1,6-lactam	cpd01832
L-Octanoylcarnitine	L-Octanoylcarnitine	cpd01833
MEK	MEK	cpd01834
N,N-Dimethylaniline	N,N-Dimethylaniline	cpd01835
N-Ethylglycocyamine	N-Ethylglycocyamine	cpd01836
N-Furfurylformamide	N-Furfurylformamide	cpd01837
N-Phospho-D-lombricine	N-Phospho-D-lombricine	cpd01838
N3'-Acetylapramycin	N3'-Acetylapramycin	cpd01839
O-Butanoylcarnitine	O-Butanoylcarnitine	cpd01840
O-Demethylpuromycin	O-Demethylpuromycin	cpd01841
O-Sinapoylglucarate	O-Sinapoylglucarate	cpd01842
Lecanoric acid	Lecanoric acid	cpd01843
Propionyl phosphate	ppap	cpd01844
Protochlorophyllide	Protochlorophyllide	cpd01845
Ribose triphosphate	Ribose triphosphate	cpd01847
S-Hexyl-glutathione	S-Hexyl-glutathione	cpd01848
Sinapoyl malate	Sinapoyl malate	cpd01849
L-Sorbose 1P	L-Sorbose 1P	cpd01850
Tetrahydropalmatine	Tetrahydropalmatine	cpd01851
Thiamin acetic acid	Thiamin acetic acid	cpd01852
Unsaturated alcohol	Unsaturated alcohol	cpd01853
Watasenia luciferin	Watasenia luciferin	cpd01854
Xylitol 5-phosphate	Xylitol 5-phosphate	cpd01855
beta-Cyclopiazonate	beta-Cyclopiazonate	cpd01856
p-Menthane-3,8-diol	p-Menthane-3,8-diol	cpd01857
Ampelopsin	Ampelopsin	cpd01858
(2-Naphthyl)methanol	(2-Naphthyl)methanol	cpd01859
(R)-Hydroxyglutarate	(R)-Hydroxyglutarate	cpd01860
(R)-1,2-Propanediol	12ppd-R	cpd01861
(S)-2-O-Sulfolactate	(S)-2-O-Sulfolactate	cpd01862
(S)-N-Methylcanadine	(S)-N-Methylcanadine	cpd01863
(S)-Norlaudanosoline	(S)-Norlaudanosoline	cpd01864
1-Methylnicotinamide	1mncam	cpd01866
1-Sinapoyl-D-glucose	1-Sinapoyl-D-glucose	cpd01867
2'-Hydroformononetin	2'-Hydroformononetin	cpd01868
2'-Hydroxyisoflavone	2'-Hydroxyisoflavone	cpd01869
2'-O-Methyllicodione	2'-O-Methyllicodione	cpd01870
3-Methylcatechol	3mcat	cpd01871
Dimercaprol	Dimercaprol	cpd01872
2-Aminobutan-4-olide	2-Aminobutan-4-olide	cpd01873
2-Caffeoylisocitrate	2-Caffeoylisocitrate	cpd01874
2-Dehydro-D-xylonate	2-Dehydro-D-xylonate	cpd01875
2-Methyleneglutarate	2-Methyleneglutarate	cpd01876
3,4-Dihydroxypyridine	3,4-Dihydroxypyridine	cpd01877
3,5-Dichlorocatechol	3,5-Dichlorocatechol	cpd01878
3-Dehydrosphinganine	3dsphgn	cpd01879
3-Indoleacetaldoxime	3-Indoleacetaldoxime	cpd01880
3-Indoleacetonitrile	ind3acnl	cpd01881
Isovaleryl-CoA	ivcoa	cpd01882
3-Oxo-5alpha-steroid	3-Oxo-5alpha-steroid	cpd01883
3-Oxo-delta1-steroid	3-Oxo-delta1-steroid	cpd01884
3-Oxo-hydroxysteroid	3-Oxo-hydroxysteroid	cpd01885
3-Oxoglycyrrhetinate	3-Oxoglycyrrhetinate	cpd01886
(3Z)-Dodecenoyl-CoA	C12:1(C3)-COA	cpd01887
3beta-Hydroxysteroid	3beta-Hydroxysteroid	cpd01888
4-Acetamidobutanoate	4aabutn	cpd01889
4-Coumaroylshikimate	4-Coumaroylshikimate	cpd01890
Propioin	Propioin	cpd01891
4-Hydroxybenzoyl-CoA	4hbcoa	cpd01892
5-Hydroxyxanthotoxin	5-Hydroxyxanthotoxin	cpd01893
5-Oxo-1,2-campholide	5-Oxo-1,2-campholide	cpd01894
7,8-Dihydrobiopterin	7,8-Dihydrobiopterin	cpd01895
6-Aminopenicillanate	6ampenc	cpd01896
7beta-Hydroxysteroid	7beta-Hydroxysteroid	cpd01897
8-Oxodeoxycoformycin	8-Oxodeoxycoformycin	cpd01898
Ceramide phosphate	Ceramide phosphate	cpd01899
Cytarabine	Cytarabine	cpd01900
D-Allose 6-phosphate	all6p	cpd01901
D-Glucosyl-D-mannose	D-Glucosyl-D-mannose	cpd01902
D-Hexose 6-phosphate	D-Hexose 6-phosphate	cpd01903
Decaprenol phosphate	Decaprenol phosphate	cpd01904
Ethyl butyrylacetate	Ethyl butyrylacetate	cpd01905
GDP-6-deoxy-D-talose	GDP-6-deoxy-D-talose	cpd01907
Glycerol 2-phosphate	glyc2p	cpd01908
Hydroxyanthraquinone	Hydroxyanthraquinone	cpd01909
L-2-Hydroxyphytanate	L-2-Hydroxyphytanate	cpd01910
Abrine	Abrine	cpd01911
L-Fucose 1-phosphate	fuc1p__L	cpd01912
L-Glutaminyl-peptide	L-Glutaminyl-peptide	cpd01913
L-Methionine S-oxide	metox	cpd01914
L-Palmitoylcarnitine	L-Palmitoylcarnitine	cpd01915
L-Rhamno-1,4-lactone	L-Rhamno-1,4-lactone	cpd01916
Kyotorphin	Kyotorphin	cpd01917
L-Xylono-1,4-lactone	L-Xylono-1,4-lactone	cpd01918
maltose-6-phosphate	malt6p	cpd01919
Meclofenamate sodium	Meclofenamate sodium	cpd01920
N-Acetyl-L-histidine	N-Acetyl-L-histidine	cpd01921
N-Acetylaralkylamine	N-Acetylaralkylamine	cpd01922
N-Acetylmuramoyl-Ala	acmama	cpd01923
N-Benzoyl-D-arginine	N-Benzoyl-D-arginine	cpd01924
N-Caffeoylputrescine	N-Caffeoylputrescine	cpd01925
N-Glucosylnicotinate	N-Glucosylnicotinate	cpd01926
N-Hydroxy-L-tyrosine	N-Hydroxy-L-tyrosine	cpd01927
N-Methylanthranilate	N-Methylanthranilate	cpd01928
N-Propionylimidazole	N-Propionylimidazole	cpd01929
N3'-Acetylgentamicin	N3'-Acetylgentamicin	cpd01930
N3'-Acetyltobramycin	N3'-Acetyltobramycin	cpd01931
1,2-Naphthalenediol	1,2-Naphthalenediol	cpd01932
O-Carbamoyl-L-serine	O-Carbamoyl-L-serine	cpd01933
O-Propionylcarnitine	O-Propionylcarnitine	cpd01934
Phorbol 13-butanoate	Phorbol 13-butanoate	cpd01935
Testosterone acetate	Testosterone acetate	cpd01936
Thiamin triphosphate	thmtp	cpd01937
Uracil 5-carboxylate	Uracil 5-carboxylate	cpd01938
Uridine 2'-phosphate	Uridine 2'-phosphate	cpd01939
alpha-Cyclopiazonate	alpha-Cyclopiazonate	cpd01940
dTDP-D-galacturonate	dTDP-D-galacturonate	cpd01941
gamma-Linolenoyl-CoA	gamma-Linolenoyl-CoA	cpd01942
2,5-Diketocamphane	2,5-Diketocamphane	cpd01943
(+)-trans-Piperitenol	(+)-trans-Piperitenol	cpd01944
(R)-2-Hydroxystearate	(R)-2-Hydroxystearate	cpd01945
(R)-6-Hydroxynicotine	(R)-6-Hydroxynicotine	cpd01946
BDOH	btd-RR	cpd01947
(S)-2-Hydroxystearate	(S)-2-Hydroxystearate	cpd01948
(S,S)-2,3-Butanediol	(S,S)-2,3-Butanediol	cpd01949
1,4-Diguanidinobutane	1,4-Diguanidinobutane	cpd01950
13-Hydroxydocosanoate	13-Hydroxydocosanoate	cpd01951
16beta-Hydroxysteroid	16beta-Hydroxysteroid	cpd01952
17beta-Hydroxysteroid	17beta-Hydroxysteroid	cpd01953
2,3-Dihydrogossypetin	2,3-Dihydrogossypetin	cpd01954
2,6-Dihydroxypyridine	2,6-Dihydroxypyridine	cpd01955
o-Formylbenzoic acid	o-Formylbenzoic acid	cpd01956
2-Hydroxyglutaryl-CoA	2-Hydroxyglutaryl-CoA	cpd01957
2-Hydroxymethylserine	2-Hydroxymethylserine	cpd01958
2-O-Caffeoylglucarate	2-O-Caffeoylglucarate	cpd01959
2-Oxohept-3-enedioate	2-Oxohept-3-enedioate	cpd01960
3-Dehydro-L-threonate	3-Dehydro-L-threonate	cpd01961
3-Guanidinopropanoate	3-Guanidinopropanoate	cpd01962
3-Hydroxy-L-glutamate	3-Hydroxy-L-glutamate	cpd01963
3-Hydroxybenzaldehyde	3-Hydroxybenzaldehyde	cpd01964
3-Hydroxyhexobarbital	3-Hydroxyhexobarbital	cpd01965
Dimethylacryloyl-CoA	3mb2coa	cpd01966
3-Oxo-5beta-cholanate	3-Oxo-5beta-cholanate	cpd01967
3-aci-Nitropropanoate	3-aci-Nitropropanoate	cpd01968
3alpha-Hydroxysteroid	3alpha-Hydroxysteroid	cpd01969
4'-O-Methylisoflavone	4'-O-Methylisoflavone	cpd01970
4-Bromophenyl acetate	4-Bromophenyl acetate	cpd01971
4-Chlorophenylacetate	4-Chlorophenylacetate	cpd01972
4-Guanidinobutanamide	4gudbd	cpd01973
4-Hydroxy-L-glutamate	4hglu	cpd01974
4-Hydroxyhydratropate	4-Hydroxyhydratropate	cpd01975
Hymecromone	Hymecromone	cpd01976
4-Phospho-L-aspartate	4pasp	cpd01977
4-Substituted aniline	4-Substituted aniline	cpd01978
5-Acetamidopentanoate	5-Acetamidopentanoate	cpd01979
5-Hydroxymethyluracil	5-Hydroxymethyluracil	cpd01980
5-Methylthio-D-ribose	5mtr	cpd01981
5-Phosphoribosylamine	pram	cpd01982
Coprostan-3-one	Coprostan-3-one	cpd01983
6-endo-Hydroxycineole	6-endo-Hydroxycineole	cpd01984
Daphnetin	Daphnetin	cpd01985
N-Aminoacyl-L-histidine	N-Aminoacyl-L-histidine	cpd01986
Aromatic hydroxy acid	Aromatic hydroxy acid	cpd01987
Aryl beta-D-glucoside	Aryl beta-D-glucoside	cpd01988
Benzyl isothiocyanate	Benzyl isothiocyanate	cpd01989
Cyclobutadipyrimidine	Cyclobutadipyrimidine	cpd01990
2'-Cytidylic acid	2'-Cytidylic acid	cpd01991
D-Glucono-1,4-lactone	D-Glucono-1,4-lactone	cpd01992
D-Glucosylsphingosine	D-Glucosylsphingosine	cpd01993
D-Threose 4-phosphate	D-Threose 4-phosphate	cpd01994
Deacetylcephalosporin C	Deacetylcephalosporin C	cpd01995
Diisopropyl phosphate	Diisopropyl phosphate	cpd01996
Dimethylbenzimidazole	dmbzid	cpd01997
Farnesyl triphosphate	Farnesyl triphosphate	cpd01998
GDP-D-rhamnose	gdpdr	cpd01999
Glycerophosphodiester	Glycerophosphodiester	cpd02000
Glycoprotein inositol	Glycoprotein inositol	cpd02001
Haloaromatic compound	Haloaromatic compound	cpd02002
L-Aspartylhydroxamate	L-Aspartylhydroxamate	cpd02003
L-Iduronate 2-sulfate	L-Iduronate 2-sulfate	cpd02004
DMF	DMF	cpd02005
N-Acetyl-D-hexosamine	N-Acetyl-D-hexosamine	cpd02006
N-Acetyl-D-tryptophan	N-Acetyl-D-tryptophan	cpd02007
N-Amidino-L-aspartate	N-Amidino-L-aspartate	cpd02008
N-Amidino-L-glutamate	N-Amidino-L-glutamate	cpd02009
N-Benzoylanthranilate	N-Benzoylanthranilate	cpd02010
N-D-Glucosylarylamine	N-D-Glucosylarylamine	cpd02011
N-Formyl-L-methionine	fmet	cpd02012
N-Glycolyl-D-glucosamine	N-Glycolyl-D-glucosamine	cpd02013
N-Malonylanthranilate	N-Malonylanthranilate	cpd02014
N-Phosphotaurocyamine	N-Phosphotaurocyamine	cpd02015
N-Ribosylnicotinamide	rnam	cpd02016
N2-Acylated Lys-CH2Cl	N2-Acylated Lys-CH2Cl	cpd02017
N5-Methyl-L-glutamine	co3153	cpd02018
N6'-Acetylkanamycin-B	N6'-Acetylkanamycin-B	cpd02019
O-Feruloylgalactarate	O-Feruloylgalactarate	cpd02020
Succinylbenzoyl-CoA	sbzcoa	cpd02021
Phenanthrene-3,4-diol	Phenanthrene-3,4-diol	cpd02022
Phosphoguanidinoacetate	Phosphoguanidinoacetate	cpd02023
Phosphonoacetaldehyde	ppaca	cpd02024
N-D-Ribosylpyrimidine	N-D-Ribosylpyrimidine	cpd02025
TSST	TSST	cpd02026
S-Methyl-L-methionine	mmet	cpd02027
S-Methylthioglycolate	S-Methylthioglycolate	cpd02028
S-Succinylglutathione	S-Succinylglutathione	cpd02029
3-phosphoshikimate	skm5p	cpd02030
Steroid hydroperoxide	Steroid hydroperoxide	cpd02031
Streptamine phosphate	Streptamine phosphate	cpd02032
Tetrahydroxypteridine	Tetrahydroxypteridine	cpd02033
Z-Gly-Pro-Leu-Gly-Pro	Z-Gly-Pro-Leu-Gly-Pro	cpd02034
Zinc protoporphyrin	Zinc protoporphyrin	cpd02035
dTDP-6-deoxy-L-talose	dTDP-6-deoxy-L-talose	cpd02036
sn-Glyceryl phosphate	sn-Glyceryl phosphate	cpd02037
(+)-Bornyl-diphosphate	(+)-Bornyl-diphosphate	cpd02038
[truncated: 14,331 more rows]
