# Supplementary material for: Bactabolize: A tool for high-throughput generation of bacterial strain-specific metabolic models
Source: bioRxiv preprint, doi:10.1101/2023.02.26.530115, version 2 (2023-06-29)
Supplement: Data S2 [file 530115_file18.xlsx]

## Sheet: Legend
Table	Data type	Source
1.TraDIS_sgk_results	Data frame showing TRaDIS results for K. pneumoniae KPPR1, along with single gene knockout growth results of the KPPR1 metabolic models on simulated LB media, aerobically grown	This study + Short Francesca, L., et al., Genomic Profiling Reveals Distinct Routes To Complement Resistance in Klebsiella pneumoniae. Infection and Immunity, 2020. 88(8): p. e00043-20.
1.TraDIS_sgk_results columns	Description
ids	Gene ID from Short Francesca, L., et al
Gene_name	Gene name
Status	Gene essentiality based on TraDIS results
Strand	DNA strand based. + or -
Gene_start	Gene start in terms of bp position within genome
Gene_end	Gene end in terms of bp position within genome
Gene_length	Length of gene (bp)
Category	Whether the gene was disrupted or undisrupted. Used to infer gene essentiality
Annotation	Gene annotation
identifier	Unique identifier used by Francesca et al
Bactabolize_KpSC_pan	Whether single gene knockout analysis on the Bactabolize model using the KpSC pan model as a reference indicated the gene was essential or not. 'Essential' = essential gene. 'Non-essential' = non-essential gene. 'NA' = gene not present in model
iKp1289	Whether single gene knockout analysis on the Bactabolize model using the manually curated iKp1289 model inidicated the was essential or not. 'Essential' = essential gene. 'Non-essential' = non-essential gene. 'NA' = gene not present in model
CarveMe_universal	Whether single gene knockout analysis on the CarveMe model using the universal model as a reference indicated gene was essential or not. 'Essential' = essential gene. 'Non-essential' = non-essential gene. 'NA' = gene not present in model
CarveMe_KpSC_pan	Whether single gene knockout analysis on the CarveMe model using the KpSC pan model as a reference indicated gene was essential or not. 'Essential' = essential gene. 'Non-essential' = non-essential gene. 'NA' = gene not present in model
gapseq	Whether single gene knockout analysis on the gapseq model indicated gene was essential or not. 'Essential' = essential gene. 'Non-essential' = non-essential gene. 'NA' = gene not present in model
KBase	Whether single gene knockout analysis on the KBase model indicated gene was essential or not. 'Essential' = essential gene. 'Non-essential' = non-essential gene. 'NA' = gene not present in model

## Sheet: 1.TraDIS_sgk_results
ids	Gene_name	Status	Strand	Gene_start	Gene_end	Gene_length	Category	Annotation	identifier	Bactabolize_KpSC_pan	iKp1289	CarveMe_universal	CarveMe_KpSC_pan	gapseq	KBase
VK055_0001	VK055_0001	Essential	+	15	227	212	undisrupted	lambda phage tail tape-measure family protein	VK055_0001_.	NA	NA	NA	NA	NA	NA
VK055_0002	VK055_0002	Essential	+	2012	2512	500	undisrupted	putative kinase domain protein	VK055_0002_.	NA	NA	NA	NA	NA	NA
VK055_0003	VK055_0003	Essential	+	2784	2936	152	undisrupted	hypothetical protein	VK055_0003_.	NA	NA	NA	NA	NA	NA
VK055_0004	VK055_0004	Essential	+	2998	3153	155	undisrupted	putative kinase domain protein	VK055_0004_.	NA	NA	NA	NA	NA	NA
VK055_0005	VK055_0005	Essential	+	3150	5027	1877	undisrupted	phage tail family protein	VK055_0005_.	NA	NA	NA	NA	NA	NA
VK055_0006	VK055_0006	Essential	+	5102	7255	2153	undisrupted	hypothetical protein	VK055_0006_.	NA	NA	NA	NA	NA	NA
VK055_0007	VK055_0007	Essential	+	7268	8002	734	undisrupted	hypothetical protein	VK055_0007_.	NA	NA	NA	NA	NA	NA
VK055_0008	VK055_0008	Essential	-	8068	10410	2342	undisrupted	GDSL-like Lipase/Acylhydrolase family protein	VK055_0008_.	NA	NA	NA	NA	NA	NA
VK055_0009	VK055_0009	Essential	+	10502	11080	578	undisrupted	resolvase, N terminal domain protein	VK055_0009_.	NA	NA	NA	NA	NA	NA
VK055_0010	VK055_0010	Essential	+	11930	12055	125	undisrupted	helix-turn-helix domain of resolvase family protein	VK055_0010_.	NA	NA	NA	NA	NA	NA
VK055_0012	VK055_0012	Essential	+	12404	12730	326	undisrupted	hypothetical protein	VK055_0012_.	NA	NA	NA	NA	NA	NA
VK055_0014	VK055_0014	Essential	+	15011	15187	176	undisrupted	putative outer membrane protein N	VK055_0014_.	NA	NA	NA	NA	NA	NA
VK055_0015	VK055_0015	Essential	+	15230	15937	707	undisrupted	HD domain protein	VK055_0015_.	NA	NA	NA	NA	NA	NA
VK055_0021	VK055_0021	Essential	-	21965	22189	224	undisrupted	hypothetical protein	VK055_0021_.	NA	NA	NA	NA	NA	NA
VK055_0022	VK055_0022	Essential	+	22314	22511	197	undisrupted	dextransucrase DSRB family protein	VK055_0022_.	NA	NA	NA	NA	NA	NA
VK055_0030	VK055_0030	Essential	+	29337	30059	722	undisrupted	bacterial regulatory, luxR family protein	VK055_0030_.	NA	NA	NA	NA	NA	NA
VK055_0031	VK055_0031	Essential	-	30127	30351	224	undisrupted	hypothetical protein	VK055_0031_.	NA	NA	NA	NA	NA	NA
VK055_0034	pgsA	Essential	+	33356	33904	548	undisrupted	CDP-diacylglycerol--glycerol-3-phosphate 3-phosphatidyltransferase	VK055_0034_pgsA	Essential	Non-essential	Non-essential	Essential	Essential	NA
VK055_0035	VK055_0035	Essential	+	34055	34130	75	undisrupted	NA	VK055_0035_.	NA	NA	NA	NA	NA	NA
VK055_0036	VK055_0036	Essential	+	34171	34244	73	undisrupted	NA	VK055_0036_.	NA	NA	NA	NA	NA	NA
VK055_0037	VK055_0037	Essential	+	34258	34344	86	undisrupted	NA	VK055_0037_.	NA	NA	NA	NA	NA	NA
VK055_0041	VK055_0041	Essential	+	37649	37888	239	undisrupted	hypothetical protein	VK055_0041_.	NA	NA	NA	NA	NA	NA
VK055_0043	VK055_0043	Essential	-	38479	38658	179	undisrupted	hypothetical protein	VK055_0043_.	NA	NA	NA	NA	NA	NA
VK055_0048	VK055_0048	Essential	+	42955	43113	158	undisrupted	putative succinate dehydrogenase	VK055_0048_.	NA	NA	NA	NA	NA	NA
VK055_0050	VK055_0050	Essential	+	44067	44213	146	undisrupted	hypothetical protein	VK055_0050_.	NA	NA	NA	NA	NA	NA
VK055_0065	VK055_0065	Essential	-	59751	60569	818	undisrupted	hypothetical protein	VK055_0065_.	NA	NA	NA	NA	NA	NA
VK055_0068	ntpA	Essential	+	63189	63632	443	undisrupted	dATP pyrophosphohydrolase	VK055_0068_ntpA	Non-essential	Non-essential	Non-essential	Non-essential	NA	NA
VK055_0069	VK055_0069	Essential	+	63660	64400	740	undisrupted	DNA-binding regulatory , YebC/PmpR family protein	VK055_0069_.	NA	NA	NA	NA	NA	NA
VK055_0070	ruvC	Essential	+	64435	64956	521	undisrupted	crossover junction endodeoxyribonuclease RuvC	VK055_0070_ruvC	NA	NA	NA	NA	NA	NA
VK055_0071	ruvA	Essential	+	65036	65647	611	undisrupted	holliday junction DNA helicase RuvA	VK055_0071_ruvA	NA	NA	NA	NA	NA	NA
VK055_0072	ruvB	Essential	+	65656	66666	1010	undisrupted	holliday junction DNA helicase RuvB	VK055_0072_ruvB	NA	NA	NA	NA	NA	NA
VK055_0080	VK055_0080	Essential	+	74391	74540	149	undisrupted	putative formate-tetrahydrofolate ligase	VK055_0080_.	NA	NA	NA	NA	NA	NA
VK055_0083	eda	Essential	+	78099	78740	641	undisrupted	eda	VK055_0083_eda	Non-essential	Non-essential	Non-essential	Non-essential	Non-essential	NA
VK055_0085	yebG	Essential	+	80119	80466	347	undisrupted	hypothetical protein regulated by LexA	VK055_0085_yebG	NA	NA	NA	NA	NA	NA
VK055_0090	VK055_0090	Essential	+	84582	84905	323	undisrupted	copC domain protein	VK055_0090_.	NA	NA	NA	NA	NA	NA
VK055_0092	VK055_0092	Essential	+	85795	86133	338	undisrupted	hypothetical protein	VK055_0092_.	NA	NA	NA	NA	NA	NA
VK055_0093	VK055_0093	Essential	-	86770	86913	143	undisrupted	hypothetical protein	VK055_0093_.	NA	NA	NA	NA	NA	NA
VK055_0094	VK055_0094	Essential	-	87018	87977	959	undisrupted	hypothetical protein	VK055_0094_.	NA	NA	NA	NA	NA	NA
VK055_0102	VK055_0102	Essential	+	95607	96284	677	undisrupted	putative structural transport element	VK055_0102_.	NA	NA	NA	NA	NA	NA
VK055_0106	kdgR	Essential	+	101086	101877	791	undisrupted	kdgR transcriptional repressor	VK055_0106_kdgR	NA	NA	NA	NA	NA	NA
VK055_0108	mgrB	Essential	+	102333	102476	143	undisrupted	small protein involved in the acid stress response	VK055_0108_mgrB	NA	NA	NA	NA	NA	NA
VK055_0110	cspC	Essential	+	103589	103798	209	undisrupted	stress , member of the CspA stress protein, member of the CspA family predicted DNA-binding transcriptional regulator	VK055_0110_cspC	NA	NA	NA	NA	NA	NA
VK055_0113	VK055_0113	Essential	-	106594	107160	566	undisrupted	hypothetical protein	VK055_0113_.	NA	NA	Non-essential	NA	Non-essential	NA
VK055_0116	manY	Essential	-	108964	109764	800	undisrupted	manY	VK055_0116_manY	Non-essential	Non-essential	Non-essential	Non-essential	NA	NA
VK055_0126	VK055_0126	Essential	+	120863	121558	695	undisrupted	putative peptidase	VK055_0126_.	NA	NA	NA	NA	NA	NA
VK055_0130	minE	Essential	-	125343	125612	269	undisrupted	cell division topological specificity factor MinE	VK055_0130_minE	NA	NA	NA	NA	NA	NA
VK055_0133	VK055_0133	Essential	+	127370	127558	188	undisrupted	ycgL domain protein	VK055_0133_.	NA	NA	NA	NA	NA	NA
VK055_0135	VK055_0135	Essential	+	128329	128775	446	undisrupted	flagellin N-methylase family protein	VK055_0135_.	NA	NA	NA	NA	NA	NA
VK055_0137	dsbB	Essential	-	129277	129756	479	undisrupted	dsbBreduced	VK055_0137_dsbB	Non-essential	Non-essential	NA	NA	NA	NA
VK055_0142	VK055_0142	Essential	+	134138	134284	146	undisrupted	hypothetical protein	VK055_0142_.	NA	NA	NA	NA	NA	NA
VK055_0146	VK055_0146	Essential	-	138604	139518	914	undisrupted	L,D-carboxypeptidase A	VK055_0146_.	Non-essential	Non-essential	Non-essential	Non-essential	NA	NA
VK055_0154	VK055_0154	Essential	+	149266	149814	548	undisrupted	meiotically up-regulated gene 113 family protein	VK055_0154_.	NA	NA	NA	NA	NA	NA
VK055_0158	VK055_0158	Essential	-	152095	152217	122	undisrupted	putative nitrilotriacetate monooxygenase	VK055_0158_.	NA	NA	NA	NA	NA	NA
VK055_0159	VK055_0159	Essential	-	152515	152658	143	undisrupted	hypothetical protein	VK055_0159_.	NA	NA	NA	NA	NA	NA
VK055_0160	VK055_0160	Essential	+	152835	153776	941	undisrupted	bacterial regulatory helix-turn-helix , lysR family protein	VK055_0160_.	NA	NA	NA	NA	NA	NA
VK055_0163	ackA	Essential	+	156244	157452	1208	undisrupted	acetate kinase	VK055_0163_ackA	Non-essential	Non-essential	Non-essential	Non-essential	Non-essential	NA
VK055_0177	VK055_0177	Essential	-	173009	173491	482	undisrupted	putative cold-shock protein	VK055_0177_.	NA	NA	NA	NA	NA	NA
VK055_0181	VK055_0181	Essential	+	175559	175720	161	undisrupted	hypothetical protein	VK055_0181_.	NA	NA	NA	NA	NA	NA
VK055_0185	VK055_0185	Essential	+	179767	179928	161	undisrupted	hypothetical protein	VK055_0185_.	NA	NA	NA	NA	NA	NA
VK055_0190	VK055_0190	Essential	+	187229	189100	1871	undisrupted	phospholipase D family protein	VK055_0190_.	NA	NA	NA	NA	NA	NA
VK055_0192	VK055_0192	Essential	+	190409	190915	506	undisrupted	sel1 repeat family protein	VK055_0192_.	NA	NA	NA	NA	NA	NA
VK055_0205	VK055_0205	Essential	+	205573	205902	329	undisrupted	hypothetical protein	VK055_0205_.	NA	NA	NA	NA	NA	NA
VK055_0207	pth	Essential	-	207194	207778	584	undisrupted	peptidyl-tRNA hydrolase	VK055_0207_pth	NA	NA	NA	NA	Non-essential	NA
VK055_0212	prsA	Essential	-	211398	212336	938	undisrupted	ribose-phosphate diphosphokinase	VK055_0212_prsA	Non-essential	Non-essential	Non-essential	Non-essential	Essential	NA
VK055_0213	ispE	Essential	-	212529	213380	851	undisrupted	4-(cytidine 5'-diphospho)-2-C-methyl-D-erythritol kinase	VK055_0213_ispE	Non-essential	Non-essential	Essential	NA	Essential	NA
VK055_0214	lolB	Essential	-	213377	213988	611	undisrupted	outer membrane lipoprotein LolB	VK055_0214_lolB	NA	NA	NA	NA	Essential	NA
VK055_0215	hemA	Essential	+	214259	215515	1256	undisrupted	glutamyl-tRNA reductase	VK055_0215_hemA	Non-essential	Non-essential	Non-essential	Non-essential	Essential	NA
VK055_0216	prfA	Essential	+	215558	216640	1082	undisrupted	peptide chain release factor 1	VK055_0216_prfA	NA	NA	NA	NA	NA	NA
VK055_0217	prmC	Essential	+	216640	217488	848	undisrupted	protein-(glutamine-N5) methyltransferase, release factor-specific	VK055_0217_prmC	NA	NA	Non-essential	Non-essential	NA	NA
VK055_0218	VK055_0218	Essential	+	217530	217880	350	undisrupted	invasion gene expression up-regulator, SirB family protein	VK055_0218_.	NA	NA	NA	NA	NA	NA
VK055_0219	VK055_0219	Essential	+	217884	218696	812	undisrupted	tetratricopeptide repeat family protein	VK055_0219_.	NA	NA	NA	NA	NA	NA
VK055_0220	kdsA	Essential	+	218736	219590	854	undisrupted	3-deoxy-8-phosphooctulonate synthase	VK055_0220_kdsA	Essential	Essential	NA	Essential	Essential	NA
VK055_0224	VK055_0224	Essential	+	222130	222249	119	undisrupted	hypothetical protein	VK055_0224_.	NA	NA	NA	NA	NA	NA
VK055_0240	narJ	Essential	+	245597	246307	710	undisrupted	nitrate reductase molybdenum cofactor assembly chaperone	VK055_0240_narJ	Non-essential	Non-essential	Non-essential	NA	Non-essential	NA
VK055_0244	VK055_0244	Essential	-	248717	248801	84	undisrupted	NA	VK055_0244_.	NA	NA	NA	NA	NA	NA
VK055_0245	VK055_0245	Essential	-	249017	249101	84	undisrupted	NA	VK055_0245_.	NA	NA	NA	NA	NA	NA
VK055_0251	hns	Essential	-	253944	254267	323	undisrupted	H-NS transcriptional dual regulator	VK055_0251_hns	NA	NA	NA	NA	NA	NA
VK055_0252	VK055_0252	Essential	-	254774	254905	131	undisrupted	hypothetical protein	VK055_0252_.	NA	NA	NA	NA	NA	NA
VK055_0255	VK055_0255	Essential	+	258431	258646	215	undisrupted	hypothetical protein	VK055_0255_.	NA	NA	NA	NA	NA	NA
VK055_0256	VK055_0256	Essential	+	258830	259477	647	undisrupted	marC integral membrane family protein	VK055_0256_.	NA	NA	NA	NA	NA	NA
VK055_0257	VK055_0257	Essential	-	259524	259640	116	undisrupted	hypothetical protein	VK055_0257_.	NA	NA	NA	NA	NA	NA
VK055_0264	VK055_0264	Essential	-	266749	267078	329	undisrupted	hypothetical protein	VK055_0264_.	NA	NA	NA	NA	NA	NA
VK055_0266	VK055_0266	Essential	+	268753	268890	137	undisrupted	hypothetical protein	VK055_0266_.	NA	NA	NA	NA	NA	NA
VK055_0268	VK055_0268	Essential	-	269376	269954	578	undisrupted	yceI-like domain protein	VK055_0268_.	NA	NA	NA	NA	NA	NA
VK055_0272	VK055_0272	Essential	-	272980	273264	284	undisrupted	hypothetical protein	VK055_0272_.	NA	NA	NA	NA	NA	NA
VK055_0273	VK055_0273	Essential	-	273359	274291	932	undisrupted	hexose kinase, 1-phosphofructokinase family protein	VK055_0273_.	Non-essential	Non-essential	Non-essential	Non-essential	NA	NA
VK055_0275	VK055_0275	Essential	+	275678	275911	233	undisrupted	hypothetical protein	VK055_0275_.	NA	NA	NA	NA	NA	NA
VK055_0276	thrS	Essential	+	276403	278271	1868	undisrupted	threonine--tRNA ligase	VK055_0276_thrS	Non-essential	Non-essential	NA	NA	Non-essential	NA
VK055_0277	infC	Essential	+	278476	278817	341	undisrupted	translation initiation factor IF-3	VK055_0277_infC	NA	NA	NA	NA	NA	NA
VK055_0278	rpmI	Essential	+	278895	279107	212	undisrupted	ribosomal protein L35	VK055_0278_rpmI	NA	NA	NA	NA	NA	NA
VK055_0279	rplT	Essential	+	279209	279514	305	undisrupted	ribosomal protein L20	VK055_0279_rplT	NA	NA	NA	NA	NA	NA
VK055_0280	pheS	Essential	+	279821	280804	983	undisrupted	phenylalanine--tRNA ligase, alpha subunit	VK055_0280_pheS	Non-essential	Non-essential	NA	NA	Non-essential	NA
VK055_0281	pheT	Essential	+	280820	283207	2387	undisrupted	phenylalanine--tRNA ligase, beta subunit	VK055_0281_pheT	Non-essential	Non-essential	NA	NA	Non-essential	NA
VK055_0282	ihfA	Essential	+	283212	283511	299	undisrupted	integration host factor, alpha subunit	VK055_0282_ihfA	NA	NA	NA	NA	NA	NA
VK055_0283	VK055_0283	Essential	-	283564	283917	353	undisrupted	endoribonuclease L-PSP family protein	VK055_0283_.	NA	NA	NA	NA	NA	NA
VK055_0290	btuD	Essential	+	290578	291327	749	undisrupted	vitamin B12 import ATP-binding protein BtuD	VK055_0290_btuD	Non-essential	Non-essential	NA	NA	NA	NA
VK055_0291	VK055_0291	Essential	+	291409	291873	464	undisrupted	nlpC/P60 family protein	VK055_0291_.	NA	NA	NA	NA	NA	NA
VK055_0293	VK055_0293	Essential	-	293459	293638	179	undisrupted	hemin uptake hemP family protein	VK055_0293_.	NA	NA	NA	NA	NA	NA
VK055_0296	VK055_0296	Essential	-	295973	296092	119	undisrupted	hypothetical protein	VK055_0296_.	NA	NA	NA	NA	NA	NA
VK055_0298	VK055_0298	Essential	+	299397	299564	167	undisrupted	hypothetical protein	VK055_0298_.	NA	NA	NA	NA	NA	NA
VK055_0299	VK055_0299	Essential	-	299897	301009	1112	undisrupted	hypothetical protein	VK055_0299_.	NA	NA	NA	NA	NA	NA
VK055_0302	VK055_0302	Essential	+	304896	305144	248	undisrupted	transglycosylase associated family protein	VK055_0302_.	NA	NA	NA	NA	NA	NA
VK055_0303	VK055_0303	Essential	-	305242	305562	320	undisrupted	hypothetical protein	VK055_0303_.	NA	NA	NA	NA	NA	NA
VK055_0313	VK055_0313	Essential	+	315251	316360	1109	undisrupted	efflux transporter, RND family, MFP subunit	VK055_0313_.	NA	NA	NA	NA	NA	NA
VK055_0316	VK055_0316	Essential	-	320944	321576	632	undisrupted	bacterial regulatory, tetR family protein	VK055_0316_.	NA	NA	NA	NA	NA	NA
VK055_0317	VK055_0317	Essential	-	321573	321917	344	undisrupted	doxX family protein	VK055_0317_.	NA	NA	NA	NA	NA	NA
VK055_0318	VK055_0318	Essential	+	322205	322402	197	undisrupted	hypothetical protein	VK055_0318_.	NA	NA	NA	NA	NA	NA
VK055_0319	sufA	Essential	+	322810	323187	377	undisrupted	feS assembly scaffold SufA	VK055_0319_sufA	NA	NA	NA	NA	NA	NA
VK055_0326	lpp	Essential	-	329482	329718	236	undisrupted	murein lipoprotein	VK055_0326_lpp	Non-essential	Non-essential	NA	NA	NA	NA
VK055_0328	VK055_0328	Essential	+	331801	331959	158	undisrupted	hypothetical protein	VK055_0328_.	NA	NA	NA	NA	NA	NA
VK055_0329	VK055_0329	Essential	+	331949	332161	212	undisrupted	hypothetical protein	VK055_0329_.	NA	NA	NA	NA	NA	NA
VK055_0334	VK055_0334	Essential	-	337827	338576	749	undisrupted	ABC transporter family protein	VK055_0334_.	NA	NA	Non-essential	NA	NA	NA
VK055_0336	VK055_0336	Essential	-	338573	339553	980	undisrupted	fecCD transport family protein	VK055_0336_.	NA	NA	Non-essential	NA	NA	NA
VK055_0337	VK055_0337	Essential	-	339570	340628	1058	undisrupted	periplasmic binding family protein	VK055_0337_.	NA	NA	Non-essential	NA	Non-essential	NA
VK055_0341	mhpC	Essential	+	344338	345204	866	undisrupted	2-hydroxy-6-oxononadienedioate/2-hydroxy-6-oxononatrienedioate hydrolase	VK055_0341_mhpC	Non-essential	Non-essential	Non-essential	NA	Non-essential	NA
VK055_0352	VK055_0352	Essential	+	355662	356624	962	undisrupted	ABC transporter, substrate-binding , aliphatic sulfonates family protein	VK055_0352_.	NA	NA	Non-essential	NA	NA	NA
VK055_0359	VK055_0359	Essential	+	362960	363985	1025	undisrupted	fecCD transport family protein	VK055_0359_.	NA	NA	Non-essential	NA	NA	NA
VK055_0362	VK055_0362	Essential	+	365998	366900	902	undisrupted	helix-turn-helix domain, rpiR family protein	VK055_0362_.	NA	NA	NA	Non-essential	NA	NA
VK055_0365	artP	Essential	+	368575	369297	722	undisrupted	amino acid ABC transporter	VK055_0365_artP	NA	NA	Non-essential	Non-essential	Non-essential	NA
VK055_0373	VK055_0373	Essential	-	378183	379262	1079	undisrupted	malate/L-lactate dehydrogenase family protein	VK055_0373_.	NA	NA	Non-essential	Non-essential	Non-essential	NA
VK055_0374	VK055_0374	Essential	+	379310	379546	236	undisrupted	hypothetical protein	VK055_0374_.	NA	NA	NA	NA	NA	NA
VK055_0378	VK055_0378	Essential	+	384567	384746	179	undisrupted	hypothetical protein	VK055_0378_.	NA	NA	NA	NA	NA	NA
VK055_0381	casB	Essential	+	388955	389521	566	undisrupted	CRISPR type I-E/ECOLI-associated protein CasB/Cse2	VK055_0381_casB	NA	NA	NA	NA	NA	NA
VK055_0383	cas7	Essential	+	390191	391165	974	undisrupted	CRISPR-associated protein Cas7/Cse4/CasC, subtype I-E/ECOLI	VK055_0383_cas7	NA	NA	NA	NA	NA	NA
VK055_0393	ccmA	Essential	+	400622	401245	623	undisrupted	heme ABC exporter, ATP-binding protein CcmA	VK055_0393_ccmA	Non-essential	Non-essential	Non-essential	Non-essential	NA	NA
VK055_0394	ccmB	Essential	+	401242	401901	659	undisrupted	heme exporter protein CcmB	VK055_0394_ccmB	Non-essential	Non-essential	Non-essential	Non-essential	NA	NA
VK055_0395	ccmC	Essential	+	401951	402688	737	undisrupted	ccmC	VK055_0395_ccmC	Non-essential	Non-essential	Non-essential	Non-essential	NA	NA
VK055_0396	ccmD	Essential	+	402685	402915	230	undisrupted	heme exporter protein CcmD	VK055_0396_ccmD	NA	NA	Non-essential	Non-essential	NA	NA
VK055_0399	dsbE	Essential	+	405303	405857	554	undisrupted	disulfide oxidoreductase, DsbE subfamily protein	VK055_0399_dsbE	NA	NA	NA	NA	NA	NA
VK055_0410	bdhA	Essential	-	417642	418412	770	undisrupted	beta-D-hydroxybutyrate dehydrogenase	VK055_0410_bdhA	NA	NA	Non-essential	NA	Non-essential	NA
VK055_0413	VK055_0413	Essential	-	420810	421991	1181	undisrupted	acetyl-CoA C-acetyltransferase family protein	VK055_0413_.	Non-essential	Non-essential	Non-essential	Non-essential	Non-essential	NA
VK055_0414	VK055_0414	Essential	-	422001	422657	656	undisrupted	3-oxoacid CoA-transferase, B subunit	VK055_0414_.	Non-essential	Non-essential	Non-essential	Non-essential	Non-essential	NA
VK055_0416	VK055_0416	Essential	+	423513	424397	884	undisrupted	bacterial regulatory helix-turn-helix , lysR family protein	VK055_0416_.	NA	NA	NA	NA	NA	NA
VK055_0417	VK055_0417	Essential	-	424442	424582	140	undisrupted	hypothetical protein	VK055_0417_.	NA	NA	NA	NA	NA	NA
VK055_0419	VK055_0419	Essential	-	425946	426224	278	undisrupted	hypothetical protein	VK055_0419_.	NA	NA	NA	NA	NA	NA
VK055_0422	VK055_0422	Essential	-	428120	428935	815	undisrupted	binding-protein-dependent transport system innermembrane component family protein	VK055_0422_.	NA	NA	NA	NA	NA	NA
VK055_0425	VK055_0425	Essential	-	430747	431628	881	undisrupted	creatinine amidohydrolase family protein	VK055_0425_.	NA	NA	NA	NA	NA	NA
VK055_0426	VK055_0426	Essential	-	431625	432104	479	undisrupted	endoribonuclease L-PSP family protein	VK055_0426_.	NA	NA	NA	NA	NA	NA
VK055_0430	VK055_0430	Essential	+	435191	435463	272	undisrupted	lysR substrate binding domain protein	VK055_0430_.	NA	NA	NA	NA	NA	NA
VK055_0445	VK055_0445	Essential	+	454151	455032	881	undisrupted	helix-turn-helix domain, rpiR family protein	VK055_0445_.	NA	NA	NA	Non-essential	NA	NA
VK055_0449	VK055_0449	Essential	+	459101	459385	284	undisrupted	transcriptional regulator, LuxR family	VK055_0449_.	NA	NA	NA	NA	NA	NA
VK055_0453	VK055_0453	Essential	-	461889	462869	980	undisrupted	oligopeptide/dipeptide ABC transporter, ATP-binding , C-terminal domain protein	VK055_0453_.	NA	NA	Non-essential	Non-essential	Non-essential	NA
VK055_0461	cynT	Essential	+	469708	470343	635	undisrupted	carbonate dehydratase carbonic anhydrase	VK055_0461_cynT	Non-essential	Non-essential	Non-essential	Non-essential	NA	NA
VK055_0464	VK055_0464	Essential	-	471712	472146	434	undisrupted	transcriptional regulatory , C terminal family protein	VK055_0464_.	NA	NA	NA	NA	NA	NA
VK055_0465	VK055_0465	Essential	-	472785	473621	836	undisrupted	metallo-beta-lactamase superfamily protein	VK055_0465_.	NA	NA	NA	NA	NA	NA
VK055_0467	VK055_0467	Essential	-	475181	476107	926	undisrupted	bacterial regulatory helix-turn-helix, AraC family protein	VK055_0467_.	NA	NA	NA	NA	NA	NA
VK055_0468	VK055_0468	Essential	+	474300	475184	884	undisrupted	bacterial regulatory helix-turn-helix , lysR family protein	VK055_0468_.	NA	NA	NA	NA	NA	NA
VK055_0469	VK055_0469	Essential	+	476218	476958	740	undisrupted	short chain dehydrogenase family protein	VK055_0469_.	NA	NA	NA	NA	Non-essential	NA
VK055_0470	VK055_0470	Essential	+	478297	478467	170	undisrupted	hypothetical protein	VK055_0470_.	NA	NA	NA	NA	NA	NA
VK055_0471	VK055_0471	Essential	-	478654	478730	76	undisrupted	NA	VK055_0471_.	NA	NA	NA	NA	NA	NA
VK055_0472	VK055_0472	Essential	-	478735	478811	76	undisrupted	NA	VK055_0472_.	NA	NA	NA	NA	NA	NA
VK055_0473	VK055_0473	Essential	-	478816	478892	76	undisrupted	NA	VK055_0473_.	NA	NA	NA	NA	NA	NA
VK055_0477	ribE	Essential	+	482051	482686	635	undisrupted	riboflavin synthase, alpha subunit	VK055_0477_ribE	Non-essential	Non-essential	Non-essential	NA	Non-essential	NA
VK055_0484	VK055_0484	Essential	+	490245	490730	485	undisrupted	bacterial regulatory helix-turn-helix, AraC family protein	VK055_0484_.	NA	NA	NA	NA	NA	NA
VK055_0486	rnt	Essential	-	492293	492940	647	undisrupted	ribonuclease T	VK055_0486_rnt	NA	NA	NA	NA	NA	NA
VK055_0487	gloA	Essential	-	493078	493485	407	undisrupted	lactoylglutathione lyase	VK055_0487_gloA	Non-essential	Non-essential	Non-essential	Non-essential	Non-essential	NA
VK055_0491	VK055_0491	Essential	+	495745	496641	896	undisrupted	aldo/keto reductase family protein	VK055_0491_.	NA	NA	Non-essential	NA	NA	NA
VK055_0493	sodC	Essential	+	496795	497232	437	undisrupted	superoxide dismutase	VK055_0493_sodC	Non-essential	Non-essential	Non-essential	NA	Non-essential	NA
VK055_0498	pcp	Essential	-	502623	503063	440	undisrupted	outer membrane lipoprotein pcp	VK055_0498_pcp	NA	NA	NA	NA	NA	NA
VK055_0499	anmK	Essential	+	503385	504482	1097	undisrupted	anhydro-N-acetylmuramic acid kinase	VK055_0499_anmK	Non-essential	Non-essential	Non-essential	NA	NA	NA
VK055_0501	pdxH	Essential	+	504956	505612	656	undisrupted	pyridoxamine 5'-phosphate oxidase	VK055_0501_pdxH	Non-essential	Non-essential	Essential	Non-essential	Non-essential	NA
VK055_0502	tyrS	Essential	+	505737	507011	1274	undisrupted	tyrosine--tRNA ligase	VK055_0502_tyrS	Non-essential	Non-essential	NA	NA	Non-essential	NA
VK055_0513	VK055_0513	Essential	-	515978	516535	557	undisrupted	electron transport complex, RnfABCDGE type, B subunit	VK055_0513_.	NA	NA	NA	NA	NA	NA
VK055_0514	VK055_0514	Essential	-	516556	517137	581	undisrupted	electron transport complex, RnfABCDGE type, A subunit	VK055_0514_.	NA	NA	NA	NA	Non-essential	NA
VK055_0520	VK055_0520	Essential	-	522213	523367	1154	undisrupted	major Facilitator Superfamily protein	VK055_0520_.	NA	NA	NA	NA	NA	NA
VK055_0525	VK055_0525	Essential	+	525718	525993	275	undisrupted	metal-sensitive transcriptional repressor familyprotein	VK055_0525_.	NA	NA	NA	NA	NA	NA
VK055_0539	VK055_0539	Essential	+	542028	542141	113	undisrupted	hypothetical protein	VK055_0539_.	NA	NA	NA	NA	NA	NA
VK055_0541	VK055_0541	Essential	-	542978	543844	866	undisrupted	eamA-like transporter family protein	VK055_0541_.	NA	NA	Non-essential	Non-essential	NA	NA
VK055_0544	VK055_0544	Essential	+	546253	546822	569	undisrupted	transcriptional regulator, HTH_3 family	VK055_0544_.	NA	NA	NA	NA	NA	NA
VK055_0545	VK055_0545	Essential	-	546833	547000	167	undisrupted	hypothetical protein	VK055_0545_.	NA	NA	NA	NA	NA	NA
VK055_0547	VK055_0547	Essential	-	549008	549238	230	undisrupted	hypothetical protein	VK055_0547_.	NA	NA	NA	NA	NA	NA
VK055_0549	VK055_0549	Essential	-	549785	549910	125	undisrupted	hypothetical protein	VK055_0549_.	NA	NA	NA	NA	NA	NA
VK055_0559	VK055_0559	Essential	+	561022	561273	251	undisrupted	hypothetical protein	VK055_0559_.	NA	NA	NA	NA	NA	NA
VK055_0560	VK055_0560	Essential	+	561612	561785	173	undisrupted	hypothetical protein	VK055_0560_.	NA	NA	NA	NA	NA	NA
VK055_0562	VK055_0562	Essential	-	562637	564070	1433	undisrupted	aldehyde dehydrogenase family protein	VK055_0562_.	NA	NA	Non-essential	NA	Non-essential	Non-essential
VK055_0565	VK055_0565	Essential	-	566197	566646	449	undisrupted	putative inner membrane protein	VK055_0565_.	NA	NA	NA	NA	NA	NA
VK055_0568	VK055_0568	Essential	+	567971	569008	1037	undisrupted	zinc-binding dehydrogenase family protein	VK055_0568_.	NA	NA	NA	NA	Non-essential	NA
VK055_0569	VK055_0569	Essential	-	569072	570007	935	undisrupted	ribonucleoside hydrolase 1	VK055_0569_.	Non-essential	Non-essential	Non-essential	Non-essential	Non-essential	NA
VK055_0571	VK055_0571	Essential	+	570289	570588	299	undisrupted	hypothetical protein	VK055_0571_.	NA	NA	NA	NA	NA	NA
VK055_0575	VK055_0575	Essential	+	576152	576394	242	undisrupted	putative lipoprotein	VK055_0575_.	NA	NA	NA	NA	NA	NA
VK055_0577	VK055_0577	Essential	-	578089	578976	887	undisrupted	bacterial regulatory helix-turn-helix , lysR family protein	VK055_0577_.	NA	NA	NA	NA	NA	NA
VK055_0579	VK055_0579	Essential	+	579893	580900	1007	undisrupted	luciferase oxidoreductase, group 1 family protein	VK055_0579_.	NA	NA	NA	NA	Non-essential	NA
VK055_0580	VK055_0580	Essential	+	580890	582011	1121	undisrupted	hypothetical protein	VK055_0580_.	NA	NA	Non-essential	Non-essential	Non-essential	NA
VK055_0589	VK055_0589	Essential	+	588582	588878	296	undisrupted	helix-turn-helix family protein	VK055_0589_.	NA	NA	NA	NA	NA	NA
VK055_0590	VK055_0590	Essential	+	589116	589403	287	undisrupted	putative membrane protein	VK055_0590_.	NA	NA	NA	NA	NA	NA
VK055_0601	narJ2	Essential	-	601488	602183	695	undisrupted	nitrate reductase molybdenum cofactor assembly chaperone	VK055_0601_narJ2	Non-essential	Non-essential	Non-essential	NA	Non-essential	NA
VK055_0609	catC	Essential	+	613518	613808	290	undisrupted	muconolactone delta-isomerase	VK055_0609_catC	Non-essential	Non-essential	Non-essential	NA	NA	NA
VK055_0618	fdxH2	Essential	+	622747	623631	884	undisrupted	formate dehydrogenase, beta subunit	VK055_0618_fdxH2	Non-essential	Non-essential	Non-essential	Non-essential	NA	NA
VK055_0620	VK055_0620	Essential	-	624333	624659	326	undisrupted	ccdB family protein	VK055_0620_.	NA	NA	NA	NA	NA	NA
VK055_0621	VK055_0621	Essential	-	624656	624844	188	undisrupted	hypothetical protein	VK055_0621_.	NA	NA	NA	NA	NA	NA
VK055_0623	VK055_0623	Essential	-	625906	626346	440	undisrupted	glyoxalase/Bleomycin resistance /Dioxygenase superfamily protein	VK055_0623_.	NA	NA	NA	NA	NA	NA
VK055_0633	VK055_0633	Essential	+	637115	638068	953	undisrupted	acetyltransferase family protein	VK055_0633_.	NA	NA	NA	NA	NA	NA
VK055_0637	VK055_0637	Essential	-	642823	642972	149	undisrupted	hypothetical protein	VK055_0637_.	NA	NA	NA	NA	NA	NA
VK055_0638	VK055_0638	Essential	-	642988	643128	140	undisrupted	30S ribosomal subunit S22 family protein	VK055_0638_.	NA	NA	NA	NA	NA	NA
VK055_0641	VK055_0641	Essential	-	645232	645477	245	undisrupted	hypothetical protein	VK055_0641_.	NA	NA	NA	NA	NA	NA
VK055_0643	VK055_0643	Essential	+	647235	647429	194	undisrupted	hypothetical protein	VK055_0643_.	NA	NA	NA	NA	NA	NA
VK055_0644	VK055_0644	Essential	+	647796	648011	215	undisrupted	putative auxin efflux carrier	VK055_0644_.	NA	NA	NA	NA	NA	NA
VK055_0646	VK055_0646	Essential	+	648558	648740	182	undisrupted	hypothetical protein	VK055_0646_.	NA	NA	NA	NA	NA	NA
VK055_0647	VK055_0647	Essential	-	650402	651388	986	undisrupted	short chain dehydrogenase family protein	VK055_0647_.	NA	NA	Non-essential	NA	NA	NA
VK055_0649	VK055_0649	Essential	-	651716	652162	446	undisrupted	hypothetical protein	VK055_0649_.	NA	NA	NA	NA	NA	NA
VK055_0650	VK055_0650	Essential	-	652171	652674	503	undisrupted	hypothetical protein	VK055_0650_.	NA	NA	NA	NA	NA	NA
VK055_0652	VK055_0652	Essential	+	653239	653385	146	undisrupted	hypothetical protein	VK055_0652_.	NA	NA	NA	NA	NA	NA
VK055_0654	VK055_0654	Essential	+	654045	654914	869	undisrupted	hypothetical protein	VK055_0654_.	NA	NA	NA	NA	NA	NA
VK055_0659	VK055_0659	Essential	+	660673	661554	881	undisrupted	bacterial regulatory helix-turn-helix , lysR family protein	VK055_0659_.	NA	NA	NA	NA	NA	NA
VK055_0662	VK055_0662	Essential	+	665899	666843	944	undisrupted	bacterial regulatory helix-turn-helix, AraC family protein	VK055_0662_.	NA	NA	NA	NA	NA	NA
VK055_0669	mgtC2	Essential	+	672501	672698	197	undisrupted	mgtC family magnesium transporter domain protein	VK055_0669_mgtC2	NA	NA	NA	NA	NA	NA
VK055_0675	VK055_0675	Essential	+	679386	680123	737	undisrupted	glutamine amidotransferase class-I family protein	VK055_0675_.	NA	NA	Non-essential	Non-essential	NA	NA
VK055_0677	pqqD	Essential	-	683534	683812	278	undisrupted	coenzyme PQQ biosynthesis protein PqqD	VK055_0677_pqqD	NA	NA	NA	NA	NA	NA
VK055_0679	pqqB	Essential	-	684564	685490	926	undisrupted	coenzyme PQQ biosynthesis protein B	VK055_0679_pqqB	NA	NA	NA	NA	NA	NA
VK055_0680	VK055_0680	Essential	-	685753	686772	1019	undisrupted	dipeptidase AC. Metallo peptidase	VK055_0680_.	NA	NA	NA	NA	NA	NA
VK055_0681	VK055_0681	Essential	+	687016	688008	992	undisrupted	alpha/beta hydrolase fold family protein	VK055_0681_.	NA	NA	NA	NA	NA	NA
VK055_0684	VK055_0684	Essential	+	690278	691468	1190	undisrupted	ahpC/TSA family protein	VK055_0684_.	NA	NA	NA	NA	NA	NA
VK055_0685	VK055_0685	Essential	-	691645	692526	881	undisrupted	bacterial regulatory helix-turn-helix , lysR family protein	VK055_0685_.	NA	NA	NA	NA	NA	NA
VK055_0689	VK055_0689	Essential	-	696875	697585	710	undisrupted	binding-protein-dependent transport system innermembrane component family protein	VK055_0689_.	NA	NA	Non-essential	NA	NA	NA
VK055_0690	VK055_0690	Essential	-	697582	698310	728	undisrupted	ABC transporter family protein	VK055_0690_.	NA	NA	Non-essential	NA	NA	NA
VK055_0691	VK055_0691	Essential	-	698307	699002	695	undisrupted	transcriptional activator, TenA family	VK055_0691_.	Non-essential	Non-essential	Non-essential	NA	NA	NA
VK055_0699	VK055_0699	Essential	+	708710	709426	716	undisrupted	bacterial regulatory, gntR family protein	VK055_0699_.	NA	NA	NA	NA	NA	NA
VK055_0700	VK055_0700	Essential	+	709447	710169	722	undisrupted	asp/Glu/Hydantoin racemase family protein	VK055_0700_.	Non-essential	Non-essential	Non-essential	Non-essential	NA	NA
VK055_0709	VK055_0709	Essential	-	717669	717845	176	undisrupted	ASCH domain protein	VK055_0709_.	NA	NA	NA	NA	NA	NA
VK055_0711	VK055_0711	Essential	+	718203	718370	167	undisrupted	putative membrane domain protein	VK055_0711_.	NA	NA	NA	NA	NA	NA
VK055_0714	VK055_0714	Essential	-	721227	722270	1043	undisrupted	efflux transporter, RND family, MFP subunit	VK055_0714_.	NA	NA	NA	NA	NA	NA
VK055_0717	VK055_0717	Essential	-	724288	724710	422	undisrupted	acetyltransferase family protein	VK055_0717_.	NA	NA	NA	NA	NA	NA
VK055_0720	VK055_0720	Essential	-	726573	726758	185	undisrupted	hypothetical protein	VK055_0720_.	NA	NA	NA	NA	NA	NA
VK055_0723	VK055_0723	Essential	+	729589	730374	785	undisrupted	bacterial extracellular solute-binding, 3 familyprotein	VK055_0723_.	NA	NA	Non-essential	NA	NA	NA
VK055_0726	VK055_0726	Essential	+	731686	732423	737	undisrupted	ABC transporter family protein	VK055_0726_.	NA	NA	NA	NA	Non-essential	NA
VK055_0728	VK055_0728	Essential	+	733677	734936	1259	undisrupted	amidase, hydantoinase/carbamoylase family protein	VK055_0728_.	Non-essential	Non-essential	Non-essential	Non-essential	Non-essential	NA
VK055_0732	VK055_0732	Essential	+	737732	738253	521	undisrupted	transposase family protein	VK055_0732_.	NA	NA	NA	NA	NA	NA
VK055_0733	VK055_0733	Essential	+	738310	739095	785	undisrupted	putative transposase	VK055_0733_.	NA	NA	NA	NA	NA	NA
VK055_0738	VK055_0738	Essential	-	745815	746393	578	undisrupted	bacterial regulatory, tetR family protein	VK055_0738_.	NA	NA	NA	NA	NA	NA
VK055_0742	VK055_0742	Essential	+	748131	748256	125	undisrupted	hypothetical protein	VK055_0742_.	NA	Non-essential	NA	NA	NA	NA
VK055_0747	VK055_0747	Essential	+	752196	752444	248	undisrupted	phosphoenolpyruvate-dependent sugar phosphotransferase system, EIIA 2 family protein	VK055_0747_.	NA	NA	Non-essential	NA	NA	NA
VK055_0748	VK055_0748	Essential	+	752456	752722	266	undisrupted	PTS system, Lactose/Cellobiose specific IIB subunit	VK055_0748_.	NA	NA	Non-essential	NA	NA	Non-essential
VK055_0751	fruA	Essential	+	754833	755303	470	undisrupted	PTS system, fructose subfamily, IIA component domain protein	VK055_0751_fruA	NA	NA	Non-essential	NA	NA	NA
VK055_0752	frwB	Essential	+	755360	755671	311	undisrupted	frwB	VK055_0752_frwB	NA	NA	Non-essential	NA	NA	NA
VK055_0759	VK055_0759	Essential	+	761492	761608	116	undisrupted	putative enzyme	VK055_0759_.	NA	NA	NA	NA	NA	NA
VK055_0760	VK055_0760	Essential	-	761907	762335	428	undisrupted	tonB C terminal family protein	VK055_0760_.	NA	NA	NA	NA	NA	NA
VK055_0766	VK055_0766	Essential	-	767590	768612	1022	undisrupted	helix-turn-helix family protein	VK055_0766_.	NA	NA	NA	NA	NA	NA
VK055_0768	VK055_0768	Essential	-	769913	770416	503	undisrupted	pfkB carbohydrate kinase family protein	VK055_0768_.	NA	NA	Non-essential	Non-essential	NA	NA
VK055_0769	VK055_0769	Essential	-	770865	770984	119	undisrupted	hypothetical protein	VK055_0769_.	NA	NA	NA	NA	NA	NA
VK055_0771	VK055_0771	Essential	+	772284	772508	224	undisrupted	hypothetical protein	VK055_0771_.	NA	NA	NA	NA	NA	NA
VK055_0772	VK055_0772	Essential	-	772705	772878	173	undisrupted	bacterial regulatory helix-turn-helix , lysR family protein	VK055_0772_.	NA	NA	NA	NA	NA	NA
VK055_0774	VK055_0774	Essential	-	774250	774462	212	undisrupted	aminotransferase domain protein	VK055_0774_.	NA	Non-essential	NA	NA	NA	NA
VK055_0783	VK055_0783	Essential	-	784002	784583	581	undisrupted	chrR Cupin-like domain protein	VK055_0783_.	NA	NA	NA	NA	Non-essential	NA
VK055_0796	VK055_0796	Essential	-	799310	800194	884	undisrupted	bacterial regulatory helix-turn-helix , lysR family protein	VK055_0796_.	NA	NA	NA	NA	NA	NA
VK055_0797	VK055_0797	Essential	+	800306	801049	743	undisrupted	sulfite exporter TauE/SafE family protein	VK055_0797_.	NA	NA	NA	NA	NA	NA
VK055_0801	VK055_0801	Essential	-	805268	805381	113	undisrupted	hypothetical protein	VK055_0801_.	NA	NA	NA	NA	NA	NA
VK055_0804	VK055_0804	Essential	+	807746	807904	158	undisrupted	hypothetical protein	VK055_0804_.	NA	NA	NA	NA	NA	NA
VK055_0805	VK055_0805	Essential	+	807933	808172	239	undisrupted	hypothetical protein	VK055_0805_.	NA	NA	NA	NA	NA	NA
VK055_0806	VK055_0806	Essential	+	808197	808337	140	undisrupted	hypothetical protein	VK055_0806_.	NA	NA	NA	NA	NA	NA
VK055_0811	VK055_0811	Essential	+	811984	812202	218	undisrupted	hypothetical protein	VK055_0811_.	NA	NA	NA	NA	NA	NA
VK055_0813	VK055_0813	Essential	-	813238	813480	242	undisrupted	hypothetical protein	VK055_0813_.	NA	NA	NA	NA	NA	NA
VK055_0820	VK055_0820	Essential	-	821544	821783	239	undisrupted	hipB Polypeptide	VK055_0820_.	NA	NA	NA	NA	NA	NA
VK055_0825	VK055_0825	Essential	+	824601	825755	1154	undisrupted	FAD binding domain protein	VK055_0825_.	Non-essential	Non-essential	Non-essential	Non-essential	Non-essential	NA
VK055_0828	VK055_0828	Essential	+	827834	828808	974	undisrupted	2Fe-2S iron-sulfur cluster binding domain protein	VK055_0828_.	Non-essential	Non-essential	Non-essential	Non-essential	Non-essential	NA
VK055_0832	VK055_0832	Essential	-	832348	832611	263	undisrupted	hypothetical protein	VK055_0832_.	NA	NA	NA	NA	NA	NA
VK055_0836	VK055_0836	Essential	+	835524	836195	671	undisrupted	binding-protein-dependent transport system innermembrane component family protein	VK055_0836_.	NA	NA	Non-essential	NA	NA	NA
VK055_0843	tam	Essential	+	842054	842815	761	undisrupted	trans-aconitate 2-methyltransferase	VK055_0843_tam	Non-essential	Non-essential	NA	NA	NA	NA
VK055_0844	VK055_0844	Essential	+	842976	843296	320	undisrupted	carboxymuconolactone decarboxylase family protein	VK055_0844_.	NA	NA	Non-essential	NA	NA	NA
VK055_0845	VK055_0845	Essential	+	843344	843667	323	undisrupted	4-oxalocrotonate tautomerase family enzyme	VK055_0845_.	NA	NA	NA	NA	NA	NA
VK055_0846	VK055_0846	Essential	-	844217	844411	194	undisrupted	hypothetical protein	VK055_0846_.	NA	NA	NA	NA	NA	NA
VK055_0847	VK055_0847	Essential	-	844416	845132	716	undisrupted	hypothetical protein	VK055_0847_.	NA	NA	NA	NA	NA	NA
VK055_0848	VK055_0848	Essential	+	845311	845490	179	undisrupted	4-oxalocrotonate tautomerase family enzyme domain protein	VK055_0848_.	NA	NA	NA	NA	NA	NA
VK055_0851	VK055_0851	Essential	-	847966	848496	530	undisrupted	acetyltransferase family protein	VK055_0851_.	NA	NA	NA	NA	NA	NA
VK055_0853	VK055_0853	Essential	-	850113	850460	347	undisrupted	hypothetical protein	VK055_0853_.	NA	NA	NA	NA	NA	NA
VK055_0857	VK055_0857	Essential	+	852979	853857	878	undisrupted	bacterial regulatory helix-turn-helix , lysR family protein	VK055_0857_.	NA	NA	NA	NA	NA	NA
VK055_0858	VK055_0858	Essential	+	854438	855382	944	undisrupted	L-lactate dehydrogenase	VK055_0858_.	NA	NA	Non-essential	Non-essential	Non-essential	Essential
VK055_0859	VK055_0859	Essential	-	855397	856158	761	undisrupted	deoR-like helix-turn-helix domain protein	VK055_0859_.	NA	NA	NA	NA	NA	NA
VK055_0869	VK055_0869	Essential	-	866037	866165	128	undisrupted	hypothetical protein	VK055_0869_.	NA	NA	NA	NA	NA	NA
VK055_0872	marB	Essential	+	867125	867343	218	undisrupted	marB family protein	VK055_0872_marB	NA	NA	NA	NA	NA	NA
VK055_0873	VK055_0873	Essential	-	867392	868291	899	undisrupted	triose-phosphate Transporter family protein	VK055_0873_.	Non-essential	Non-essential	Non-essential	Non-essential	NA	NA
VK055_0877	urtD	Essential	-	871039	871767	728	undisrupted	urea ABC transporter, ATP-binding protein UrtD	VK055_0877_urtD	NA	NA	Non-essential	NA	Non-essential	NA
VK055_0879	urtB	Essential	-	872909	874459	1550	undisrupted	urea ABC transporter, permease protein UrtB	VK055_0879_urtB	NA	NA	Non-essential	NA	NA	Non-essential
VK055_0881	VK055_0881	Essential	-	875988	877091	1103	undisrupted	hypothetical protein	VK055_0881_.	NA	NA	NA	NA	NA	NA
VK055_0886	lacI	Essential	-	879735	880799	1064	undisrupted	lacI transcriptional repressor	VK055_0886_lacI	NA	NA	NA	NA	NA	NA
VK055_0890	VK055_0890	Essential	-	886629	886868	239	undisrupted	hypothetical protein	VK055_0890_.	NA	NA	NA	NA	NA	NA
VK055_0901	VK055_0901	Essential	-	897755	898267	512	undisrupted	competence/damage-inducible CinA C-terminal domain protein	VK055_0901_.	NA	NA	NA	NA	NA	NA
VK055_0902	VK055_0902	Essential	-	898433	898906	473	undisrupted	hsp20/alpha crystallin family protein	VK055_0902_.	NA	NA	NA	NA	NA	NA
VK055_0903	VK055_0903	Essential	+	899727	899849	122	undisrupted	hypothetical protein	VK055_0903_.	NA	NA	NA	NA	NA	NA
VK055_0904	VK055_0904	Essential	-	900549	900671	122	undisrupted	hypothetical protein	VK055_0904_.	NA	NA	NA	NA	NA	NA
VK055_0905	VK055_0905	Essential	+	899923	900552	629	undisrupted	bacterial regulatory, luxR family protein	VK055_0905_.	NA	NA	NA	NA	NA	NA
VK055_0906	VK055_0906	Essential	-	900726	900854	128	undisrupted	hypothetical protein	VK055_0906_.	NA	NA	NA	NA	NA	NA
VK055_0908	VK055_0908	Essential	+	902891	903007	116	undisrupted	hypothetical protein	VK055_0908_.	NA	NA	NA	NA	NA	NA
VK055_0912	VK055_0912	Essential	-	906839	907270	431	undisrupted	universal stress protein UP12	VK055_0912_.	NA	NA	NA	NA	NA	NA
VK055_0916	VK055_0916	Essential	+	911130	911471	341	undisrupted	hypothetical protein	VK055_0916_.	NA	NA	NA	NA	NA	NA
VK055_0923	dmsD	Essential	+	917300	917908	608	undisrupted	DMS reductase maturation protein	VK055_0923_dmsD	NA	NA	NA	NA	NA	NA
VK055_0926	mlc	Essential	-	920113	921333	1220	undisrupted	dgsA transcriptional repressor	VK055_0926_mlc	NA	NA	Non-essential	Non-essential	NA	NA
VK055_0931	VK055_0931	Essential	-	925744	926115	371	undisrupted	hypothetical protein	VK055_0931_.	NA	NA	NA	NA	NA	NA
VK055_0932	VK055_0932	Essential	-	926335	926454	119	undisrupted	hypothetical protein	VK055_0932_.	NA	NA	NA	NA	NA	NA
VK055_0935	VK055_0935	Essential	+	927916	928032	116	undisrupted	hypothetical protein	VK055_0935_.	NA	NA	NA	NA	NA	NA
VK055_0937	mdtJ	Essential	-	928392	928754	362	undisrupted	mdtJ SMR protein	VK055_0937_mdtJ	NA	NA	Non-essential	NA	NA	NA
VK055_0940	mdcB	Essential	+	932111	932953	842	undisrupted	triphosphoribosyl-dephospho-CoA synthase MdcB	VK055_0940_mdcB	NA	NA	NA	NA	NA	NA
VK055_0943	mdcE	Essential	+	934096	934896	800	undisrupted	malonate decarboxylase, gamma subunit	VK055_0943_mdcE	Non-essential	Non-essential	NA	Non-essential	Non-essential	Non-essential
VK055_0947	mdcH	Essential	+	936613	937515	902	undisrupted	malonate decarboxylase, epsilon subunit	VK055_0947_mdcH	NA	NA	Non-essential	Non-essential	NA	NA
VK055_0962	pcaB	Essential	-	955514	956848	1334	undisrupted	3-carboxy-cis,cis-muconate cycloisomerase	VK055_0962_pcaB	NA	NA	Non-essential	NA	Non-essential	NA
VK055_0964	catJ	Essential	-	958089	958745	656	undisrupted	3-oxoadipate CoA-transferase subunit B	VK055_0964_catJ	Non-essential	Non-essential	Non-essential	NA	Non-essential	NA
VK055_0973	VK055_0973	Essential	+	967040	967555	515	undisrupted	methylated-DNA-[]-cysteine S-methyltransferase family protein	VK055_0973_.	NA	NA	NA	NA	NA	NA
VK055_0974	etrA	Essential	+	967750	968502	752	undisrupted	electron transport regulator A	VK055_0974_etrA	NA	NA	NA	NA	NA	NA
VK055_0976	VK055_0976	Essential	-	969701	969889	188	undisrupted	hypothetical protein	VK055_0976_.	NA	NA	NA	NA	NA	NA
VK055_0979	VK055_0979	Essential	+	973164	973280	116	undisrupted	hypothetical protein	VK055_0979_.	NA	NA	NA	NA	NA	NA
VK055_0987	VK055_0987	Essential	+	978799	980100	1301	undisrupted	HAMP domain protein	VK055_0987_.	NA	NA	NA	NA	NA	NA
VK055_0991	manA	Essential	+	984686	985864	1178	undisrupted	mannose-6-phosphate isomerase, class I	VK055_0991_manA	Non-essential	Non-essential	Non-essential	Non-essential	Non-essential	NA
VK055_0994	VK055_0994	Essential	+	988769	989257	488	undisrupted	phosphotransferase system, EIIC family protein	VK055_0994_.	NA	Non-essential	Non-essential	Non-essential	Non-essential	NA
VK055_0997	VK055_0997	Essential	-	991600	992604	1004	undisrupted	corA-like Mg2+ transporter family protein	VK055_0997_.	NA	NA	Non-essential	NA	NA	NA
VK055_0998	VK055_0998	Essential	-	992625	992744	119	undisrupted	hypothetical protein	VK055_0998_.	NA	NA	NA	NA	NA	NA
VK055_0999	VK055_0999	Essential	+	992940	993143	203	undisrupted	ydfZ family protein	VK055_0999_.	NA	NA	NA	NA	NA	NA
VK055_1003	VK055_1003	Essential	+	995591	995824	233	undisrupted	hypothetical protein	VK055_1003_.	NA	NA	NA	NA	NA	NA
VK055_1008	VK055_1008	Essential	+	999440	999565	125	undisrupted	hypothetical protein	VK055_1008_.	NA	NA	NA	NA	Non-essential	NA
VK055_1017	VK055_1017	Essential	+	1010050	1010166	116	undisrupted	hypothetical protein	VK055_1017_.	NA	NA	NA	NA	NA	NA
VK055_1025	VK055_1025	Essential	+	1018552	1019211	659	undisrupted	putative O-METHYLTRANSFERASE	VK055_1025_.	NA	NA	NA	NA	Non-essential	NA
VK055_1028	VK055_1028	Essential	-	1024021	1024143	122	undisrupted	hypothetical protein	VK055_1028_.	NA	NA	NA	NA	NA	NA
VK055_1030	paaX	Essential	-	1025046	1025972	926	undisrupted	phenylacetic acid degradation operon negative regulatory protein PaaX	VK055_1030_paaX	NA	NA	NA	NA	NA	NA
VK055_1036	VK055_1036	Essential	-	1031248	1032015	767	undisrupted	putative enoyl-CoA hydratase, mitochondrial	VK055_1036_.	Non-essential	Non-essential	Non-essential	Non-essential	Essential	NA
VK055_1037	VK055_1037	Essential	-	1032012	1033082	1070	undisrupted	2Fe-2S iron-sulfur cluster binding domain protein	VK055_1037_.	Non-essential	Non-essential	Non-essential	Non-essential	Non-essential	NA
VK055_1041	VK055_1041	Essential	-	1034661	1035590	929	undisrupted	phenylacetic acid catabolic family protein	VK055_1041_.	Non-essential	Non-essential	Non-essential	Non-essential	NA	NA
VK055_1047	VK055_1047	Essential	+	1044446	1045348	902	undisrupted	feaR transcriptional regulator FeaR transcriptional activator	VK055_1047_.	NA	NA	NA	NA	NA	NA
VK055_1051	VK055_1051	Essential	+	1048762	1049208	446	undisrupted	hypothetical protein	VK055_1051_.	NA	NA	NA	NA	NA	NA
VK055_1054	VK055_1054	Essential	-	1050954	1051118	164	undisrupted	hypothetical protein	VK055_1054_.	NA	NA	NA	NA	NA	NA
VK055_1055	VK055_1055	Essential	-	1051229	1051366	137	undisrupted	hypothetical protein	VK055_1055_.	NA	NA	NA	NA	NA	NA
VK055_1059	VK055_1059	Essential	-	1057457	1057576	119	undisrupted	hypothetical protein	VK055_1059_.	NA	NA	NA	NA	NA	NA
VK055_1060	VK055_1060	Essential	+	1057035	1057460	425	undisrupted	hypothetical protein	VK055_1060_.	NA	NA	NA	NA	NA	NA
VK055_1066	VK055_1066	Essential	+	1063898	1064092	194	undisrupted	hypothetical protein	VK055_1066_.	NA	NA	NA	NA	NA	NA
VK055_1077	VK055_1077	Essential	+	1074581	1075129	548	undisrupted	tetR-family transcriptional regulator	VK055_1077_.	NA	NA	NA	NA	NA	NA
VK055_1080	VK055_1080	Essential	+	1077045	1077968	923	undisrupted	bacterial regulatory helix-turn-helix , lysR family protein	VK055_1080_.	NA	NA	NA	NA	NA	NA
VK055_1083	VK055_1083	Essential	+	1079992	1080198	206	undisrupted	hypothetical protein	VK055_1083_.	NA	NA	NA	NA	NA	NA
VK055_1087	VK055_1087	Essential	+	1082713	1083426	713	undisrupted	putative oxidoreductase with NAD(P)-binding Rossmann-fold domain	VK055_1087_.	NA	NA	NA	NA	NA	NA
VK055_1089	sciN	Essential	-	1084114	1084641	527	undisrupted	type VI secretion lipofamily protein	VK055_1089_sciN	NA	NA	NA	NA	NA	NA
VK055_1098	VK055_1098	Essential	-	1097696	1098340	644	undisrupted	hypothetical protein	VK055_1098_.	NA	NA	NA	NA	NA	NA
VK055_1107	impB	Essential	-	1108811	1109302	491	undisrupted	type VI secretion system protein	VK055_1107_impB	NA	NA	NA	NA	NA	NA
VK055_1112	VK055_1112	Essential	-	1114784	1115227	443	undisrupted	histidine kinase-like ATPase domain protein	VK055_1112_.	NA	NA	NA	NA	NA	NA
VK055_1116	VK055_1116	Essential	-	1117708	1117932	224	undisrupted	opgC family protein	VK055_1116_.	NA	NA	NA	NA	NA	NA
VK055_1125	VK055_1125	Essential	-	1130606	1131442	836	undisrupted	oxidoreductase, aldo/keto reductase family	VK055_1125_.	NA	NA	NA	NA	Non-essential	NA
VK055_1129	VK055_1129	Essential	-	1135535	1135699	164	undisrupted	hypothetical protein	VK055_1129_.	NA	NA	NA	NA	NA	NA
VK055_1132	VK055_1132	Essential	-	1138376	1138867	491	undisrupted	hypothetical protein	VK055_1132_.	NA	NA	NA	NA	NA	NA
VK055_1133	VK055_1133	Essential	-	1139678	1139791	113	undisrupted	hypothetical protein	VK055_1133_.	NA	NA	NA	NA	NA	NA
VK055_1134	VK055_1134	Essential	+	1139501	1139695	194	undisrupted	hypothetical protein	VK055_1134_.	NA	NA	NA	NA	NA	NA
VK055_1135	VK055_1135	Essential	-	1140257	1140511	254	undisrupted	hypothetical protein	VK055_1135_.	NA	NA	NA	NA	NA	NA
VK055_1144	VK055_1144	Essential	+	1149595	1150494	899	undisrupted	bacterial regulatory helix-turn-helix , lysR family protein	VK055_1144_.	NA	NA	NA	NA	NA	NA
VK055_1147	pspD	Essential	-	1153142	1153360	218	undisrupted	peripheral inner membrane phage-shock protein	VK055_1147_pspD	NA	NA	NA	NA	NA	NA
VK055_1148	pspC	Essential	-	1153389	1153748	359	undisrupted	phage shock protein C	VK055_1148_pspC	NA	NA	NA	NA	NA	NA
VK055_1150	pspA	Essential	-	1154028	1154696	668	undisrupted	phage shock protein A	VK055_1150_pspA	NA	NA	NA	NA	NA	NA
VK055_1154	VK055_1154	Essential	-	1160875	1161717	842	undisrupted	helix-turn-helix domain protein	VK055_1154_.	NA	NA	NA	NA	NA	NA
VK055_1159	VK055_1159	Essential	+	1165659	1166549	890	undisrupted	N-terminal TM domain of oligopeptide transport permease C family protein	VK055_1159_.	NA	NA	Non-essential	Non-essential	Non-essential	NA
VK055_1160	VK055_1160	Essential	+	1166549	1167541	992	undisrupted	oligopeptide/dipeptide ABC transporter, ATP-binding , C-terminal domain protein	VK055_1160_.	Non-essential	Non-essential	Non-essential	Non-essential	Non-essential	NA
VK055_1164	VK055_1164	Essential	-	1170692	1170814	122	undisrupted	hypothetical protein	VK055_1164_.	NA	NA	NA	NA	Non-essential	NA
VK055_1166	VK055_1166	Essential	-	1171632	1171745	113	undisrupted	hypothetical protein	VK055_1166_.	NA	NA	NA	NA	NA	NA
VK055_1167	VK055_1167	Essential	+	1171744	1172901	1157	undisrupted	putative amidase/amidotransferase	VK055_1167_.	NA	NA	NA	NA	NA	NA
VK055_1169	VK055_1169	Essential	+	1174998	1175255	257	undisrupted	hypothetical protein	VK055_1169_.	NA	NA	NA	NA	NA	NA
VK055_1170	VK055_1170	Essential	+	1175327	1176076	749	undisrupted	DNA-binding transcriptional regulator	VK055_1170_.	NA	NA	NA	NA	NA	NA
VK055_1171	VK055_1171	Essential	-	1176148	1176267	119	undisrupted	hypothetical protein	VK055_1171_.	NA	NA	NA	NA	NA	NA
VK055_1172	VK055_1172	Essential	+	1176430	1176570	140	undisrupted	glycine zipper 2TM domain protein	VK055_1172_.	NA	NA	NA	NA	NA	NA
VK055_1173	VK055_1173	Essential	-	1176702	1177028	326	undisrupted	translation initiation factor SUI1 family protein	VK055_1173_.	NA	NA	NA	NA	NA	NA
VK055_1175	VK055_1175	Essential	-	1177957	1179126	1169	undisrupted	TPR repeat family protein	VK055_1175_.	NA	NA	NA	NA	NA	NA
VK055_1176	VK055_1176	Essential	-	1179133	1179441	308	undisrupted	hypothetical protein	VK055_1176_.	NA	NA	NA	NA	NA	NA
VK055_1178	ribA	Essential	+	1180508	1181110	602	undisrupted	GTP cyclohydrolase II	VK055_1178_ribA	Non-essential	Non-essential	Essential	NA	Non-essential	NA
VK055_1180	VK055_1180	Essential	-	1184218	1184385	167	undisrupted	hypothetical protein	VK055_1180_.	NA	NA	NA	NA	NA	NA
VK055_1182	topA	Essential	-	1185951	1188548	2597	undisrupted	DNA topoisomerase I	VK055_1182_topA	NA	NA	NA	NA	NA	NA
VK055_1185	VK055_1185	Essential	-	1190345	1190560	215	undisrupted	hypothetical protein	VK055_1185_.	NA	NA	NA	NA	NA	NA
VK055_1187	cobO	Essential	+	1191313	1191903	590	undisrupted	cob(I)yrinic acid a,c-diamide adenosyltransferase	VK055_1187_cobO	Non-essential	Non-essential	NA	NA	Essential	NA
VK055_1189	VK055_1189	Essential	-	1193147	1194043	896	undisrupted	bacterial regulatory helix-turn-helix , lysR family protein	VK055_1189_.	NA	NA	NA	NA	NA	NA
VK055_1192	VK055_1192	Essential	-	1195722	1196564	842	undisrupted	PHP domain protein	VK055_1192_.	NA	NA	NA	NA	NA	NA
VK055_1197	trpA	Essential	+	1202596	1203405	809	undisrupted	tryptophan synthase, alpha subunit	VK055_1197_trpA	Non-essential	Non-essential	Non-essential	Non-essential	Non-essential	NA
VK055_1200	VK055_1200	Essential	-	1205989	1207299	1310	undisrupted	major Facilitator Superfamily protein	VK055_1200_.	Non-essential	Non-essential	Non-essential	NA	NA	NA
VK055_1201	VK055_1201	Essential	+	1207428	1208336	908	undisrupted	bacterial regulatory helix-turn-helix , lysR family protein	VK055_1201_.	NA	NA	NA	NA	NA	NA
VK055_1203	VK055_1203	Essential	-	1208882	1209028	146	undisrupted	hypothetical protein	VK055_1203_.	NA	NA	NA	NA	NA	NA
VK055_1205	VK055_1205	Essential	-	1209895	1210167	272	undisrupted	hypothetical protein	VK055_1205_.	NA	NA	NA	NA	NA	NA
VK055_1206	VK055_1206	Essential	+	1210286	1210993	707	undisrupted	short chain dehydrogenase family protein	VK055_1206_.	NA	NA	NA	NA	NA	NA
VK055_1210	VK055_1210	Essential	+	1215403	1215720	317	undisrupted	flagellin N-methylase family protein	VK055_1210_.	NA	NA	NA	NA	NA	NA
VK055_1220	cedA	Essential	-	1224638	1224793	155	undisrupted	cell division modulator	VK055_1220_cedA	NA	NA	NA	NA	NA	NA
VK055_1225	VK055_1225	Essential	-	1230479	1230826	347	undisrupted	PTS system, Lactose/Cellobiose specific IIA subunit	VK055_1225_.	NA	NA	Non-essential	NA	NA	NA
VK055_1227	VK055_1227	Essential	-	1232250	1232366	116	undisrupted	hypothetical protein	VK055_1227_.	NA	NA	NA	NA	NA	NA
VK055_1228	licB	Essential	-	1232386	1232706	320	undisrupted	lichenan-specific phosphotransferase enzyme IIB component	VK055_1228_licB	NA	NA	Non-essential	NA	NA	NA
VK055_1230	nadE	Essential	+	1233606	1234433	827	undisrupted	nadE	VK055_1230_nadE	Non-essential	Non-essential	Essential	Non-essential	Essential	NA
VK055_1231	VK055_1231	Essential	+	1234534	1235397	863	undisrupted	endonuclease of nucleotide excision repair	VK055_1231_.	NA	NA	NA	NA	NA	NA
VK055_1232	VK055_1232	Essential	-	1235485	1235967	482	undisrupted	periplasmic protein related to spheroblast formation	VK055_1232_.	NA	NA	NA	NA	NA	NA
VK055_1240	VK055_1240	Essential	+	1244439	1245149	710	undisrupted	hypothetical protein	VK055_1240_.	NA	NA	NA	NA	NA	NA
VK055_1241	VK055_1241	Essential	+	1245146	1245706	560	undisrupted	carboxymuconolactone decarboxylase family protein	VK055_1241_.	NA	NA	NA	NA	NA	NA
VK055_1244	VK055_1244	Essential	+	1248395	1249027	632	undisrupted	ABC transporter family protein	VK055_1244_.	NA	NA	Non-essential	NA	Non-essential	NA
VK055_1246	VK055_1246	Essential	-	1250480	1251103	623	undisrupted	CDP-alcohol phosphatidyltransferase family protein	VK055_1246_.	NA	NA	NA	NA	NA	NA
VK055_1257	VK055_1257	Essential	+	1262769	1262960	191	undisrupted	isochorismatase family protein	VK055_1257_.	Non-essential	Non-essential	NA	NA	Non-essential	NA
VK055_1272	VK055_1272	Essential	+	1275682	1275801	119	undisrupted	hypothetical protein	VK055_1272_.	NA	NA	NA	NA	NA	NA
VK055_1273	VK055_1273	Essential	-	1275871	1276752	881	undisrupted	bacterial regulatory helix-turn-helix , lysR family protein	VK055_1273_.	NA	NA	NA	NA	NA	NA
VK055_1282	VK055_1282	Essential	+	1283724	1284248	524	undisrupted	ybaK / prolyl-tRNA synthetases associated domainprotein	VK055_1282_.	NA	NA	NA	NA	NA	NA
VK055_1287	VK055_1287	Essential	+	1287742	1288251	509	undisrupted	hypothetical protein	VK055_1287_.	NA	NA	Non-essential	Non-essential	NA	NA
VK055_1288	VK055_1288	Essential	-	1288584	1288823	239	undisrupted	hypothetical protein	VK055_1288_.	NA	NA	NA	NA	NA	NA
VK055_1291	VK055_1291	Essential	+	1290159	1290296	137	undisrupted	hypothetical protein	VK055_1291_.	NA	NA	NA	NA	NA	NA
VK055_1292	VK055_1292	Essential	+	1290488	1290613	125	undisrupted	hypothetical protein	VK055_1292_.	NA	NA	NA	NA	NA	NA
VK055_1293	VK055_1293	Essential	-	1290673	1290936	263	undisrupted	hypothetical protein	VK055_1293_.	NA	NA	NA	NA	NA	NA
VK055_1295	lpxL	Essential	-	1291795	1292709	914	undisrupted	lipid A biosynthesis lauroyl (or palmitoleoyl) acyltransferase family protein	VK055_1295_lpxL	Non-essential	Non-essential	NA	Non-essential	NA	NA
VK055_1299	VK055_1299	Essential	+	1295999	1297783	1784	undisrupted	diguanylate cyclase domain protein	VK055_1299_.	NA	NA	Non-essential	NA	NA	NA
VK055_1304	VK055_1304	Essential	-	1301704	1301883	179	undisrupted	hypothetical protein	VK055_1304_.	NA	NA	NA	NA	NA	NA
VK055_1306	VK055_1306	Essential	+	1303122	1303319	197	undisrupted	hypothetical protein	VK055_1306_.	NA	NA	NA	NA	NA	NA
VK055_1311	VK055_1311	Essential	-	1307341	1307835	494	undisrupted	hypothetical protein	VK055_1311_.	NA	NA	NA	NA	NA	NA
VK055_1312	VK055_1312	Essential	-	1307926	1308111	185	undisrupted	hypothetical protein	VK055_1312_.	NA	NA	NA	NA	NA	NA
VK055_1313	VK055_1313	Essential	+	1308331	1308483	152	undisrupted	hypothetical protein	VK055_1313_.	NA	NA	NA	NA	NA	NA
VK055_1315	VK055_1315	Essential	+	1310705	1311028	323	undisrupted	antibiotic biosynthesis monooxygenase family protein	VK055_1315_.	NA	NA	NA	NA	NA	NA
VK055_1316	VK055_1316	Essential	+	1311021	1311413	392	undisrupted	ACT domain protein	VK055_1316_.	NA	NA	Non-essential	Non-essential	NA	NA
VK055_1318	icd	Essential	-	1312396	1313646	1250	undisrupted	isocitrate dehydrogenase, NADP-dependent	VK055_1318_icd	Non-essential	Non-essential	Non-essential	Non-essential	Non-essential	NA
VK055_1320	VK055_1320	Essential	+	1314554	1315012	458	undisrupted	NUDIX domain protein	VK055_1320_.	Non-essential	Non-essential	Non-essential	Non-essential	NA	NA
VK055_1321	trmU	Essential	+	1315069	1316175	1106	undisrupted	tRNA (5-methylaminomethyl-2-thiouridylate)-methyltransferase	VK055_1321_trmU	NA	NA	NA	NA	NA	NA
VK055_1322	hflD	Essential	+	1316230	1316871	641	undisrupted	lysogenization regulator	VK055_1322_hflD	NA	NA	NA	NA	NA	NA
VK055_1323	purB	Essential	+	1316875	1318245	1370	undisrupted	adenylosuccinate lyase	VK055_1323_purB	Non-essential	Non-essential	Non-essential	Essential	Essential	NA
VK055_1325	VK055_1325	Essential	-	1318746	1319552	806	undisrupted	bacterial regulatory helix-turn-helix, AraC family protein	VK055_1325_.	NA	NA	NA	NA	NA	NA
VK055_1336	tkt	Essential	-	1332242	1334245	2003	undisrupted	transketolase	VK055_1336_tkt	Non-essential	Non-essential	Non-essential	Non-essential	Non-essential	NA
VK055_1338	rpiB	Essential	-	1335246	1335704	458	undisrupted	ribose 5-phosphate isomerase B	VK055_1338_rpiB	Non-essential	Non-essential	Non-essential	Non-essential	NA	NA
VK055_1339	VK055_1339	Essential	-	1335733	1336107	374	undisrupted	PTS system glucitol/sorbitol-specific IIA component family protein	VK055_1339_.	NA	NA	Non-essential	NA	NA	NA
VK055_1343	tpiA	Essential	+	1340225	1341019	794	undisrupted	triose-phosphate isomerase	VK055_1343_tpiA	Non-essential	Non-essential	Non-essential	Non-essential	NA	NA
VK055_1346	VK055_1346	Essential	-	1342474	1343175	701	undisrupted	hypothetical protein	VK055_1346_.	NA	NA	NA	NA	NA	NA
VK055_1348	lolE	Essential	-	1344279	1345523	1244	undisrupted	liporeleasing system, transmembrane protein LolE	VK055_1348_lolE	NA	NA	NA	NA	NA	NA
VK055_1349	lolD	Essential	-	1345523	1346224	701	undisrupted	liporeleasing system, ATP-binding protein	VK055_1349_lolD	NA	NA	Non-essential	NA	NA	NA
VK055_1350	VK055_1350	Essential	-	1346217	1347416	1199	undisrupted	liporeleasing system, transmembrane , LolC/E family protein	VK055_1350_.	NA	NA	NA	NA	NA	NA
VK055_1368	holB	Essential	-	1364948	1365952	1004	undisrupted	DNA polymerase III, delta' subunit	VK055_1368_holB	NA	NA	NA	NA	Non-essential	NA
VK055_1369	tmk	Essential	-	1365949	1366590	641	undisrupted	thymidylate kinase	VK055_1369_tmk	Essential	Non-essential	Essential	Essential	Non-essential	NA
VK055_1373	acpP	Essential	-	1369870	1370106	236	undisrupted	acyl carrier protein	VK055_1373_acpP	Essential	Non-essential	Non-essential	Non-essential	NA	Essential
VK055_1374	fabG	Essential	-	1370317	1371051	734	undisrupted	3-oxoacyl-[acyl-carrier-protein] reductase	VK055_1374_fabG	Essential	Non-essential	NA	Non-essential	Non-essential	NA
VK055_1375	fabD	Essential	-	1371064	1371942	878	undisrupted	malonyl CoA-acyl carrier protein transacylase	VK055_1375_fabD	Essential	Non-essential	Non-essential	Non-essential	Non-essential	NA
VK055_1376	fabH	Essential	-	1372009	1372962	953	undisrupted	3-oxoacyl-[acyl-carrier-] synthase III family protein	VK055_1376_fabH	Non-essential	Non-essential	NA	Non-essential	Non-essential	NA
VK055_1377	plsX	Essential	-	1373016	1373855	839	undisrupted	fatty acid/phospholipid synthesis protein PlsX	VK055_1377_plsX	NA	NA	Non-essential	NA	NA	NA
VK055_1378	rpmF	Essential	-	1374317	1374448	131	undisrupted	ribosomal protein L32	VK055_1378_rpmF	NA	NA	NA	NA	NA	NA
VK055_1379	VK055_1379	Essential	-	1374507	1375028	521	undisrupted	hypothetical protein	VK055_1379_.	NA	NA	NA	NA	NA	NA
VK055_1383	VK055_1383	Essential	-	1380717	1381652	935	undisrupted	bacterial regulatory helix-turn-helix , lysR family protein	VK055_1383_.	NA	NA	NA	NA	NA	NA
VK055_1385	mviN	Essential	-	1383029	1384564	1535	undisrupted	integral membrane protein MviN	VK055_1385_mviN	NA	NA	Non-essential	Non-essential	Non-essential	NA
VK055_1386	VK055_1386	Essential	-	1384676	1385575	899	undisrupted	oxidoreductase , NAD-binding Rossmann fold family protein	VK055_1386_.	NA	NA	NA	NA	NA	NA
VK055_1391	VK055_1391	Essential	-	1388974	1389138	164	undisrupted	hypothetical protein	VK055_1391_.	NA	NA	NA	NA	Non-essential	NA
VK055_1394	VK055_1394	Essential	+	1390761	1391015	254	undisrupted	bssS family protein	VK055_1394_.	NA	NA	NA	NA	NA	NA
VK055_1398	VK055_1398	Essential	-	1393592	1393708	116	undisrupted	hypothetical protein	VK055_1398_.	NA	NA	NA	NA	NA	NA
VK055_1406	VK055_1406	Essential	-	1402312	1402905	593	undisrupted	bacterial regulatory, tetR family protein	VK055_1406_.	NA	NA	NA	NA	NA	NA
VK055_1409	VK055_1409	Essential	-	1404235	1404789	554	undisrupted	nitrate reductase delta subunit	VK055_1409_.	NA	NA	NA	NA	NA	NA
VK055_1412	VK055_1412	Essential	+	1406845	1406932	87	undisrupted	NA	VK055_1412_.	NA	NA	NA	NA	NA	NA
VK055_1415	VK055_1415	Essential	+	1409360	1410037	677	undisrupted	putative cysteine hydrolase predicted hydrolase	VK055_1415_.	NA	NA	NA	NA	NA	NA
VK055_1416	VK055_1416	Essential	+	1410183	1410270	87	undisrupted	NA	VK055_1416_.	NA	NA	NA	NA	NA	NA
VK055_1418	VK055_1418	Essential	+	1412966	1413145	179	undisrupted	hypothetical protein	VK055_1418_.	NA	NA	NA	NA	NA	NA
VK055_1421	VK055_1421	Essential	-	1415175	1415471	296	undisrupted	hypothetical protein	VK055_1421_.	NA	NA	NA	NA	NA	NA
VK055_1422	VK055_1422	Essential	+	1415462	1415704	242	undisrupted	hypothetical protein	VK055_1422_.	NA	NA	NA	NA	NA	NA
VK055_1423	VK055_1423	Essential	-	1416318	1416665	347	undisrupted	hypothetical protein	VK055_1423_.	NA	NA	NA	NA	NA	NA
VK055_1435	VK055_1435	Essential	-	1428307	1428420	113	undisrupted	hypothetical protein	VK055_1435_.	NA	NA	NA	NA	NA	NA
VK055_1442	rutD	Essential	+	1436112	1436912	800	undisrupted	pyrimidine utilization protein D	VK055_1442_rutD	NA	NA	Non-essential	NA	Non-essential	NA
VK055_1444	rutF	Essential	+	1437510	1438004	494	undisrupted	pyrimidine utilization flavin reductase protein F	VK055_1444_rutF	NA	NA	Non-essential	NA	Non-essential	NA
VK055_1447	VK055_1447	Essential	+	1440923	1441054	131	undisrupted	hypothetical protein	VK055_1447_.	NA	NA	NA	NA	NA	NA
VK055_1452	VK055_1452	Essential	+	1444149	1444937	788	undisrupted	short chain dehydrogenase family protein	VK055_1452_.	NA	NA	Non-essential	Non-essential	NA	NA
VK055_1462	VK055_1462	Essential	+	1454537	1455622	1085	undisrupted	tartrate dehydrogenase	VK055_1462_.	Non-essential	Non-essential	Non-essential	Non-essential	Non-essential	NA
VK055_1484	VK055_1484	Essential	-	1480933	1481020	87	undisrupted	NA	VK055_1484_.	NA	NA	NA	NA	NA	NA
VK055_1488	tusE	Essential	+	1483811	1484140	329	undisrupted	sulfur relay , TusE/DsrC/DsvC family protein	VK055_1488_tusE	NA	NA	NA	NA	NA	NA
VK055_1493	VK055_1493	Essential	-	1487628	1488041	413	undisrupted	hypothetical protein	VK055_1493_.	NA	NA	NA	NA	NA	NA
VK055_1496	VK055_1496	Essential	+	1490845	1491291	446	undisrupted	hypothetical protein	VK055_1496_.	NA	NA	NA	NA	NA	NA
VK055_1499	VK055_1499	Essential	-	1494072	1494218	146	undisrupted	hypothetical protein	VK055_1499_.	NA	NA	NA	NA	NA	NA
VK055_1502	ycbG	Essential	-	1496467	1496919	452	undisrupted	macrodomain Ter protein	VK055_1502_ycbG	NA	NA	NA	NA	NA	NA
VK055_1504	fabA	Essential	+	1498932	1499450	518	undisrupted	beta-hydroxyacyl-(acyl-carrier-protein) dehydratase FabA	VK055_1504_fabA	Essential	Non-essential	Non-essential	Essential	Non-essential	NA
VK055_1514	ssuE	Essential	+	1510616	1511191	575	undisrupted	FMN reductase	VK055_1514_ssuE	Non-essential	Non-essential	Non-essential	NA	Non-essential	NA
VK055_1516	ssuD	Essential	+	1512143	1513288	1145	undisrupted	alkanesulfonate monooxygenase, FMNH(2)-dependent	VK055_1516_ssuD	Non-essential	Non-essential	Non-essential	NA	Non-essential	NA
VK055_1518	ssuB	Essential	+	1514087	1514860	773	undisrupted	aliphatic sulfonates import ATP-binding protein SsuB	VK055_1518_ssuB	Non-essential	Non-essential	Non-essential	NA	NA	NA
VK055_1526	asnS	Essential	+	1525347	1526672	1325	undisrupted	asparagine--tRNA ligase	VK055_1526_asnS	Non-essential	Non-essential	NA	NA	Non-essential	NA
VK055_1529	VK055_1529	Essential	-	1529790	1530437	647	undisrupted	metallo-beta-lactamase superfamily protein	VK055_1529_.	NA	NA	Non-essential	NA	NA	NA
VK055_1533	mukB	Essential	-	1533296	1537744	4448	undisrupted	cell division protein involved in chromosome partitioning	VK055_1533_mukB	NA	NA	NA	NA	NA	NA
VK055_1534	mukE	Essential	-	1537744	1538421	677	undisrupted	protein involved in chromosome partitioning	VK055_1534_mukE	NA	NA	NA	NA	NA	NA
VK055_1535	mukF	Essential	-	1538429	1539751	1322	undisrupted	ca2+-binding protein involved in chromosome partitioning	VK055_1535_mukF	NA	NA	NA	NA	NA	NA
VK055_1536	VK055_1536	Essential	-	1539748	1540548	800	undisrupted	ubiE/COQ5 methyltransferase family protein	VK055_1536_.	NA	NA	NA	NA	NA	NA
VK055_1539	kdsB	Essential	-	1542457	1543203	746	undisrupted	3-deoxy-D-manno-octulosonate cytidylyltransferase	VK055_1539_kdsB	Non-essential	Non-essential	NA	Non-essential	Essential	NA
VK055_1540	VK055_1540	Essential	-	1543200	1543382	182	undisrupted	hypothetical protein	VK055_1540_.	NA	NA	NA	NA	Essential	NA
VK055_1542	lpxK	Essential	-	1544730	1545710	980	undisrupted	tetraacyldisaccharide 4'-kinase	VK055_1542_lpxK	Essential	Essential	NA	Essential	Essential	NA
VK055_1543	msbA	Essential	-	1545707	1547455	1748	undisrupted	lipid A export permease/ATP-binding protein MsbA	VK055_1543_msbA	Essential	Non-essential	Non-essential	Non-essential	Non-essential	NA
VK055_1545	ihfB	Essential	-	1549989	1550276	287	undisrupted	integration host factor, beta subunit	VK055_1545_ihfB	NA	NA	NA	NA	NA	NA
VK055_1546	rpsA	Essential	-	1550428	1552101	1673	undisrupted	ribosomal protein S1	VK055_1546_rpsA	NA	NA	Non-essential	NA	NA	NA
VK055_1547	cmk	Essential	-	1552235	1552918	683	undisrupted	cytidylate kinase	VK055_1547_cmk	Non-essential	Non-essential	Non-essential	Non-essential	Non-essential	NA
VK055_1554	pflA	Essential	+	1562064	1562804	740	undisrupted	pyruvate formate-lyase 1-activating enzyme	VK055_1554_pflA	Non-essential	Non-essential	Non-essential	Non-essential	NA	NA
VK055_1560	serS	Essential	-	1568522	1569814	1292	undisrupted	serine--tRNA ligase	VK055_1560_serS	Non-essential	Non-essential	NA	NA	Non-essential	NA
VK055_1563	VK055_1563	Essential	-	1571991	1576223	4232	undisrupted	essential cell division protein FtsK	VK055_1563_.	NA	NA	NA	NA	NA	NA
VK055_1570	infA	Essential	+	1583057	1583275	218	undisrupted	translation initiation factor IF-1	VK055_1570_infA	NA	NA	NA	NA	NA	NA
VK055_1582	VK055_1582	Essential	-	1596620	1596910	290	undisrupted	doxX family protein	VK055_1582_.	NA	NA	NA	NA	NA	NA
VK055_1589	VK055_1589	Essential	-	1604692	1604811	119	undisrupted	hypothetical protein	VK055_1589_.	NA	NA	NA	NA	NA	NA
VK055_1600	VK055_1600	Essential	-	1613441	1613929	488	undisrupted	hypothetical protein	VK055_1600_.	NA	NA	NA	NA	NA	NA
VK055_1601	potI	Essential	-	1613987	1614832	845	undisrupted	potI	VK055_1601_potI	Non-essential	Non-essential	Non-essential	Non-essential	NA	NA
VK055_1609	grxA	Essential	+	1621332	1621595	263	undisrupted	glutaredoxin, GrxA family	VK055_1609_grxA	Non-essential	Non-essential	Non-essential	Non-essential	NA	NA
VK055_1610	VK055_1610	Essential	-	1621602	1621904	302	undisrupted	inner membrane of Enterobacteriaceae family protein	VK055_1610_.	NA	NA	NA	NA	NA	NA
VK055_1611	VK055_1611	Essential	+	1622252	1623937	1685	undisrupted	aspT/YidE/YbjL antiporter duplication domain protein	VK055_1611_.	NA	NA	NA	NA	NA	NA
VK055_1612	VK055_1612	Essential	+	1625489	1625608	119	undisrupted	hypothetical protein	VK055_1612_.	NA	NA	NA	NA	NA	NA
VK055_1614	VK055_1614	Essential	-	1627519	1628070	551	undisrupted	putative bacterial nucleoid DNA-binding protein	VK055_1614_.	NA	NA	NA	NA	NA	NA
VK055_1616	VK055_1616	Essential	-	1628797	1628946	149	undisrupted	hypothetical protein	VK055_1616_.	NA	NA	NA	NA	NA	NA
VK055_1621	VK055_1621	Essential	-	1633647	1635530	1883	undisrupted	phage tail tape measure protein, TP901 family, core region	VK055_1621_.	NA	NA	NA	NA	NA	NA
VK055_1622	VK055_1622	Essential	-	1635530	1635685	155	undisrupted	hypothetical protein	VK055_1622_.	NA	NA	NA	NA	NA	NA
VK055_1623	VK055_1623	Essential	-	1635718	1636011	293	undisrupted	hypothetical protein	VK055_1623_.	NA	NA	NA	NA	NA	NA
VK055_1624	VK055_1624	Essential	-	1636128	1636436	308	undisrupted	hypothetical protein	VK055_1624_.	NA	NA	NA	NA	NA	NA
VK055_1629	VK055_1629	Essential	-	1638658	1639374	716	undisrupted	phage virion morphogenesis family protein	VK055_1629_.	NA	NA	NA	NA	NA	NA
VK055_1634	VK055_1634	Essential	-	1642214	1642945	731	undisrupted	phage capsid scaffolding (GPO) serine peptidase family protein	VK055_1634_.	NA	NA	NA	NA	NA	NA
VK055_1637	VK055_1637	Essential	+	1646187	1646324	137	undisrupted	putative phage protein	VK055_1637_.	NA	NA	NA	NA	NA	NA
VK055_1640	VK055_1640	Essential	-	1649490	1649708	218	undisrupted	hypothetical protein	VK055_1640_.	NA	NA	NA	NA	NA	NA
VK055_1642	VK055_1642	Essential	-	1650191	1650619	428	undisrupted	hypothetical protein	VK055_1642_.	NA	NA	NA	NA	NA	NA
VK055_1644	VK055_1644	Essential	-	1651349	1651474	125	undisrupted	hypothetical protein	VK055_1644_.	NA	NA	NA	NA	NA	NA
VK055_1645	VK055_1645	Essential	+	1651948	1652262	314	undisrupted	putative repressor protein	VK055_1645_.	NA	NA	NA	NA	NA	NA
VK055_1646	VK055_1646	Essential	+	1652265	1653398	1133	undisrupted	AAA ATPase domain protein	VK055_1646_.	NA	NA	NA	NA	NA	NA
VK055_1651	VK055_1651	Essential	+	1657096	1657908	812	undisrupted	HAD hydrolase, IIB family protein	VK055_1651_.	NA	NA	Non-essential	NA	Non-essential	NA
VK055_1656	VK055_1656	Essential	+	1664052	1664174	122	undisrupted	hypothetical protein	VK055_1656_.	NA	NA	NA	NA	NA	NA
VK055_1661	rimO	Essential	+	1668604	1669929	1325	undisrupted	ribosomal protein S12 methylthiotransferase RimO	VK055_1661_rimO	NA	NA	NA	NA	NA	NA
VK055_1668	moeB	Essential	+	1678306	1679061	755	undisrupted	molybdopterin synthase sulfurylase MoeB	VK055_1668_moeB	NA	NA	NA	NA	NA	NA
VK055_1683	VK055_1683	Essential	+	1698048	1698173	125	undisrupted	hypothetical protein	VK055_1683_.	NA	NA	NA	NA	NA	NA
VK055_1686	VK055_1686	Essential	-	1700833	1700958	125	undisrupted	hypothetical protein	VK055_1686_.	NA	NA	NA	NA	NA	NA
VK055_1691	glnQ	Essential	+	1704542	1705264	722	undisrupted	glnQ	VK055_1691_glnQ	Non-essential	Non-essential	Non-essential	NA	Non-essential	NA
VK055_1698	VK055_1698	Essential	-	1710542	1711510	968	undisrupted	glycosyl transferase family, helical bundle domain protein	VK055_1698_.	NA	NA	Non-essential	Non-essential	NA	NA
VK055_1704	VK055_1704	Essential	-	1718084	1719415	1331	undisrupted	sugar (and other) transporter family protein	VK055_1704_.	NA	NA	Non-essential	NA	NA	NA
VK055_1705	VK055_1705	Essential	-	1719704	1719838	134	undisrupted	hypothetical protein	VK055_1705_.	NA	NA	NA	NA	NA	NA
VK055_1707	ybiH	Essential	+	1720827	1721486	659	undisrupted	transcriptional repressor	VK055_1707_ybiH	NA	NA	NA	NA	NA	NA
VK055_1708	VK055_1708	Essential	+	1721486	1722481	995	undisrupted	efflux transporter, RND family, MFP subunit	VK055_1708_.	NA	NA	NA	NA	Non-essential	NA
VK055_1718	moaD	Essential	-	1731892	1732140	248	undisrupted	molybdopterin converting factor, subunit 1	VK055_1718_moaD	NA	NA	NA	NA	NA	NA
VK055_1720	moaB	Essential	-	1732625	1733137	512	undisrupted	molybdenum cofactor biosynthesis protein B	VK055_1720_moaB	NA	NA	NA	NA	NA	NA
VK055_1743	VK055_1743	Essential	+	1762426	1763421	995	undisrupted	efflux transporter, RND family, MFP subunit	VK055_1743_.	NA	NA	NA	NA	NA	NA
VK055_1747	VK055_1747	Essential	+	1768306	1768452	146	undisrupted	hypothetical protein	VK055_1747_.	NA	NA	NA	NA	NA	NA
VK055_1748	VK055_1748	Essential	+	1768708	1768920	212	undisrupted	biofilm development YmgB/AriR family protein	VK055_1748_.	NA	NA	NA	NA	NA	NA
VK055_1753	VK055_1753	Essential	+	1772518	1772706	188	undisrupted	hypothetical protein	VK055_1753_.	NA	NA	NA	NA	NA	NA
VK055_1755	pgl	Essential	-	1773135	1774130	995	undisrupted	6-phosphogluconolactonase	VK055_1755_pgl	Non-essential	Non-essential	Non-essential	Non-essential	Non-essential	NA
VK055_1760	VK055_1760	Essential	-	1777844	1777993	149	undisrupted	hypothetical protein	VK055_1760_.	NA	NA	NA	NA	NA	NA
VK055_1767	gpmA	Essential	+	1785236	1785988	752	undisrupted	phosphoglyceromutase 1	VK055_1767_gpmA	Non-essential	Non-essential	Non-essential	Non-essential	Non-essential	NA
VK055_1773	VK055_1773	Essential	-	1791125	1791200	75	undisrupted	NA	VK055_1773_.	NA	NA	NA	NA	NA	NA
VK055_1774	VK055_1774	Essential	-	1791347	1791422	75	undisrupted	NA	VK055_1774_.	NA	NA	NA	NA	NA	NA
VK055_1775	VK055_1775	Essential	-	1791569	1791644	75	undisrupted	NA	VK055_1775_.	NA	NA	NA	NA	NA	NA
VK055_1776	VK055_1776	Essential	-	1791648	1791723	75	undisrupted	NA	VK055_1776_.	NA	NA	NA	NA	NA	NA
VK055_1777	VK055_1777	Essential	-	1791873	1791948	75	undisrupted	NA	VK055_1777_.	NA	NA	NA	NA	NA	NA
VK055_1778	VK055_1778	Essential	-	1791951	1792026	75	undisrupted	NA	VK055_1778_.	NA	NA	NA	NA	NA	NA
VK055_1779	VK055_1779	Essential	-	1792152	1792227	75	undisrupted	NA	VK055_1779_.	NA	NA	NA	NA	NA	NA
VK055_1781	pal	Essential	-	1793193	1793717	524	undisrupted	peptidoglycan-associated lipoprotein	VK055_1781_pal	NA	NA	Non-essential	Non-essential	NA	NA
VK055_1782	tolB	Essential	-	1793752	1795044	1292	undisrupted	tol-Pal system beta propeller repeat protein TolB	VK055_1782_tolB	NA	NA	NA	NA	NA	NA
VK055_1784	tolR	Essential	-	1796599	1797027	428	undisrupted	protein TolR	VK055_1784_tolR	NA	NA	Non-essential	NA	NA	NA
VK055_1785	tolQ	Essential	-	1797031	1797714	683	undisrupted	protein TolQ	VK055_1785_tolQ	NA	NA	Non-essential	NA	NA	NA
VK055_1786	VK055_1786	Essential	+	1797793	1797987	194	undisrupted	hypothetical protein	VK055_1786_.	NA	NA	NA	NA	Non-essential	NA
VK055_1787	VK055_1787	Essential	-	1798274	1798564	290	undisrupted	cyd operon protein YbgE	VK055_1787_.	NA	NA	NA	NA	NA	NA
VK055_1788	VK055_1788	Essential	-	1798564	1798680	116	undisrupted	cyd operon protein YbgT	VK055_1788_.	NA	NA	Non-essential	Non-essential	NA	NA
VK055_1792	VK055_1792	Essential	-	1802090	1802233	143	undisrupted	hypothetical protein	VK055_1792_.	NA	NA	NA	NA	NA	NA
VK055_1795	sucB	Essential	-	1804384	1805610	1226	undisrupted	dihydrolipoyllysine-residue succinyltransferase,E2 component of oxoglutarate dehydrogenase(succinyl-transferring) complex	VK055_1795_sucB	Non-essential	Non-essential	Non-essential	Non-essential	Essential	NA
VK055_1796	sucA	Essential	-	1805625	1808432	2807	undisrupted	oxoglutarate dehydrogenase (succinyl-transferring), E1 component	VK055_1796_sucA	Non-essential	Non-essential	Non-essential	Non-essential	Non-essential	NA
VK055_1800	sdhC	Essential	-	1811653	1811928	275	undisrupted	succinate dehydrogenase, cytochrome b556 subunit	VK055_1800_sdhC	NA	Non-essential	Non-essential	Non-essential	NA	Essential
VK055_1801	VK055_1801	Essential	-	1813971	1814084	113	undisrupted	hypothetical protein	VK055_1801_.	NA	NA	NA	NA	Non-essential	NA
VK055_1821	seqA	Essential	-	1834197	1834745	548	undisrupted	seqA, negative modulator of initiation of replication	VK055_1821_seqA	NA	NA	NA	NA	NA	NA
VK055_1822	ybfF	Essential	+	1834929	1835702	773	undisrupted	esterase ybfF	VK055_1822_ybfF	NA	NA	NA	NA	NA	NA
VK055_1823	ybfE	Essential	+	1835836	1836129	293	undisrupted	lexA-regulated protein	VK055_1823_ybfE	NA	NA	NA	NA	NA	NA
VK055_1824	VK055_1824	Essential	+	1836281	1836811	530	undisrupted	flavodoxin	VK055_1824_.	Non-essential	Non-essential	Non-essential	Non-essential	NA	NA
VK055_1830	glnS	Essential	-	1840391	1842058	1667	undisrupted	glutamine--tRNA ligase	VK055_1830_glnS	Non-essential	Non-essential	NA	NA	Non-essential	NA
VK055_1837	VK055_1837	Essential	+	1850848	1850924	76	undisrupted	NA	VK055_1837_.	NA	NA	NA	NA	NA	NA
VK055_1838	VK055_1838	Essential	+	1850933	1851017	84	undisrupted	NA	VK055_1838_.	NA	NA	NA	NA	NA	NA
VK055_1839	VK055_1839	Essential	+	1851041	1851115	74	undisrupted	NA	VK055_1839_.	NA	NA	NA	NA	NA	NA
VK055_1840	VK055_1840	Essential	+	1851152	1851226	74	undisrupted	NA	VK055_1840_.	NA	NA	NA	NA	NA	NA
VK055_1841	VK055_1841	Essential	+	1851250	1851326	76	undisrupted	NA	VK055_1841_.	NA	NA	NA	NA	NA	NA
VK055_1842	VK055_1842	Essential	+	1851374	1851448	74	undisrupted	NA	VK055_1842_.	NA	NA	NA	NA	NA	NA
VK055_1843	VK055_1843	Essential	+	1851524	1851598	74	undisrupted	NA	VK055_1843_.	NA	NA	NA	NA	NA	NA
VK055_1844	VK055_1844	Essential	-	1851718	1852893	1175	undisrupted	octaprenyl methyl methoxy benzoquinone hydroxylase	VK055_1844_.	Non-essential	Non-essential	NA	NA	NA	NA
VK055_1846	VK055_1846	Essential	+	1854651	1855697	1046	undisrupted	hypothetical protein with nucleoside triphosphate hydrolase domain	VK055_1846_.	NA	NA	NA	NA	NA	NA
VK055_1847	ybeY	Essential	+	1855694	1856167	473	undisrupted	YbeY	VK055_1847_ybeY	NA	NA	NA	NA	NA	NA
VK055_1849	lnt	Essential	+	1857319	1858857	1538	undisrupted	apolipoprotein N-acyltransferase	VK055_1849_lnt	Non-essential	Non-essential	NA	NA	NA	NA
VK055_1854	VK055_1854	Essential	-	1862675	1862794	119	undisrupted	hypothetical protein	VK055_1854_.	NA	NA	NA	NA	NA	NA
VK055_1858	leuS	Essential	+	1867093	1869675	2582	undisrupted	leucine--tRNA ligase	VK055_1858_leuS	Non-essential	Non-essential	NA	NA	Non-essential	NA
VK055_1859	VK055_1859	Essential	+	1869786	1870280	494	undisrupted	rare lipoprotein LptE	VK055_1859_.	NA	NA	NA	NA	NA	NA
VK055_1860	holA	Essential	+	1870280	1871311	1031	undisrupted	DNA polymerase III, delta subunit	VK055_1860_holA	NA	NA	NA	NA	NA	NA
VK055_1861	nadD	Essential	+	1871313	1871954	641	undisrupted	nicotinate (nicotinamide) nucleotide adenylyltransferase	VK055_1861_nadD	Non-essential	Non-essential	Essential	Non-essential	Non-essential	NA
VK055_1863	VK055_1863	Essential	+	1872879	1873196	317	undisrupted	oligomerization domain protein	VK055_1863_.	NA	NA	NA	NA	NA	NA
VK055_1864	rlmH	Essential	+	1873233	1873667	434	undisrupted	rRNA large subunit m3Psi methyltransferase RlmH	VK055_1864_rlmH	NA	NA	NA	NA	NA	NA
VK055_1865	mrdA2	Essential	+	1873695	1875596	1901	undisrupted	penicillin-binding protein 2	VK055_1865_mrdA2	Non-essential	Non-essential	Non-essential	Non-essential	Non-essential	NA
VK055_1866	mrdB	Essential	+	1875596	1876708	1112	undisrupted	rod shape-determining protein RodA	VK055_1866_mrdB	NA	NA	Non-essential	Non-essential	NA	NA
VK055_1867	rlpA	Essential	+	1876720	1877868	1148	undisrupted	rare lipoA family protein	VK055_1867_rlpA	NA	NA	NA	NA	NA	NA
VK055_1875	VK055_1875	Essential	+	1884085	1884468	383	undisrupted	crcB-like family protein	VK055_1875_.	NA	NA	NA	NA	NA	NA
VK055_1883	ahpC	Essential	-	1891094	1891657	563	undisrupted	peroxiredoxin	VK055_1883_ahpC	NA	NA	Non-essential	Non-essential	NA	NA
VK055_1890	mtnD	Essential	+	1897850	1898392	542	undisrupted	acireductone dioxygenase	VK055_1890_mtnD	Non-essential	Non-essential	NA	NA	Non-essential	NA
VK055_1897	VK055_1897	Essential	-	1906728	1907756	1028	undisrupted	S-adenosyl-L-homocysteine hydrolase, NAD bindingdomain protein	VK055_1897_.	NA	NA	Non-essential	Non-essential	NA	NA
VK055_1901	VK055_1901	Essential	+	1911581	1912816	1235	undisrupted	bacterial regulatory , Fis family protein	VK055_1901_.	NA	NA	NA	NA	NA	NA
VK055_1903	VK055_1903	Essential	+	1914164	1915147	983	undisrupted	periplasmic binding and sugar binding domain of LacI family protein	VK055_1903_.	NA	NA	Non-essential	NA	NA	NA
VK055_1909	VK055_1909	Essential	+	1921374	1921895	521	undisrupted	transposase family protein	VK055_1909_.	NA	NA	NA	NA	NA	NA
VK055_1910	VK055_1910	Essential	+	1921952	1922737	785	undisrupted	putative transposase	VK055_1910_.	NA	NA	NA	NA	NA	NA
VK055_1929	fepG	Essential	+	1942207	1943199	992	undisrupted	fecCD transport family protein	VK055_1929_fepG	Non-essential	Non-essential	Non-essential	NA	NA	NA
VK055_1930	fepC	Essential	+	1943217	1943990	773	undisrupted	ferric vibriobactin ABC transporter, ATP-bindingprotein	VK055_1930_fepC	Non-essential	Non-essential	Non-essential	NA	Non-essential	NA
VK055_1949	ykfE	Essential	+	1967301	1967747	446	undisrupted	ykfE inhibitor of vertebrate C-type lysozyme	VK055_1949_ykfE	NA	NA	NA	NA	NA	NA
VK055_1951	betI	Essential	+	1969955	1970542	587	undisrupted	transcriptional repressor BetI	VK055_1951_betI	NA	NA	NA	NA	Non-essential	NA
VK055_1963	VK055_1963	Essential	-	1983507	1984172	665	undisrupted	amino ABC transporter, permease , 3-TM region, His/Glu/Gln/Arg/opine family domain protein	VK055_1963_.	NA	NA	NA	NA	Non-essential	NA
VK055_1975	VK055_1975	Essential	-	1996920	1997066	146	undisrupted	hypothetical protein	VK055_1975_.	NA	NA	NA	NA	NA	NA
VK055_1981	VK055_1981	Essential	+	2006360	2006494	134	undisrupted	putative aldo/keto reductase	VK055_1981_.	NA	NA	NA	NA	NA	NA
VK055_1982	VK055_1982	Essential	+	2006870	2007118	248	undisrupted	hypothetical protein	VK055_1982_.	NA	NA	NA	NA	NA	NA
VK055_1986	VK055_1986	Essential	+	2009384	2009752	368	undisrupted	hypothetical protein	VK055_1986_.	NA	NA	NA	NA	NA	NA
VK055_1988	VK055_1988	Essential	+	2010711	2011232	521	undisrupted	transposase family protein	VK055_1988_.	NA	NA	NA	NA	NA	NA
VK055_1989	VK055_1989	Essential	+	2011289	2012074	785	undisrupted	putative transposase	VK055_1989_.	NA	NA	NA	NA	NA	NA
VK055_1990	VK055_1990	Essential	+	2012093	2012221	128	undisrupted	hypothetical protein	VK055_1990_.	NA	NA	NA	NA	NA	NA
VK055_1992	VK055_1992	Essential	-	2012518	2012814	296	undisrupted	hypothetical protein	VK055_1992_.	NA	NA	NA	NA	NA	NA
VK055_1998	VK055_1998	Essential	+	2019536	2020099	563	undisrupted	hypothetical protein	VK055_1998_.	NA	NA	NA	NA	NA	NA
VK055_2007	VK055_2007	Essential	+	2031882	2032247	365	undisrupted	cupin domain protein	VK055_2007_.	NA	NA	NA	NA	NA	NA
VK055_2010	VK055_2010	Essential	-	2034660	2035019	359	undisrupted	helix-turn-helix family protein	VK055_2010_.	NA	NA	NA	NA	NA	NA
VK055_2011	VK055_2011	Essential	-	2035084	2035326	242	undisrupted	hypothetical protein	VK055_2011_.	NA	NA	NA	NA	NA	NA
VK055_2022	VK055_2022	Essential	+	2048240	2048407	167	undisrupted	putative lipoprotein	VK055_2022_.	NA	NA	NA	NA	NA	NA
VK055_2024	VK055_2024	Essential	-	2049107	2049496	389	undisrupted	hypothetical protein	VK055_2024_.	NA	NA	NA	NA	NA	NA
VK055_2028	VK055_2028	Essential	+	2051972	2052769	797	undisrupted	ABC transporter family protein	VK055_2028_.	NA	NA	NA	NA	Non-essential	NA
VK055_2030	VK055_2030	Essential	-	2053952	2054296	344	undisrupted	hypothetical protein	VK055_2030_.	NA	NA	NA	NA	NA	NA
VK055_2032	VK055_2032	Essential	+	2055174	2055293	119	undisrupted	hypothetical protein	VK055_2032_.	NA	NA	NA	NA	NA	NA
VK055_2038	VK055_2038	Essential	-	2061842	2062483	641	undisrupted	hypothetical protein	VK055_2038_.	NA	NA	NA	NA	NA	NA
VK055_2039	VK055_2039	Essential	+	2062524	2062661	137	undisrupted	hypothetical protein	VK055_2039_.	NA	NA	NA	NA	NA	NA
VK055_2042	VK055_2042	Essential	-	2065226	2066149	923	undisrupted	periplasmic binding and sugar binding domain of LacI family protein	VK055_2042_.	NA	NA	Non-essential	NA	NA	NA
VK055_2044	VK055_2044	Essential	+	2067700	2068707	1007	undisrupted	oxidoreductase , NAD-binding Rossmann fold family protein	VK055_2044_.	Non-essential	Non-essential	Non-essential	NA	NA	NA
VK055_2045	VK055_2045	Essential	-	2069373	2070404	1031	undisrupted	oxidoreductase , NAD-binding Rossmann fold family protein	VK055_2045_.	NA	NA	NA	NA	NA	NA
VK055_2054	VK055_2054	Essential	-	2082753	2083025	272	undisrupted	hypothetical protein	VK055_2054_.	NA	NA	NA	NA	NA	NA
VK055_2062	VK055_2062	Essential	-	2090098	2090174	76	undisrupted	NA	VK055_2062_.	NA	NA	NA	NA	NA	NA
VK055_2063	folD	Essential	+	2090513	2091379	866	undisrupted	bifunctional protein folD	VK055_2063_folD	Non-essential	Non-essential	Non-essential	Non-essential	Non-essential	NA
VK055_2064	VK055_2064	Essential	+	2091381	2091593	212	undisrupted	S4 domain protein	VK055_2064_.	NA	NA	NA	NA	NA	NA
VK055_2066	VK055_2066	Essential	+	2093200	2093694	494	undisrupted	cyclophilin type peptidyl-prolyl cis-trans isomerase/CLD family protein	VK055_2066_.	NA	NA	NA	NA	NA	NA
VK055_2067	lpxH	Essential	+	2093722	2094420	698	undisrupted	UDP-2,3-diacylglucosamine hydrolase	VK055_2067_lpxH	Essential	Essential	NA	Essential	Essential	NA
VK055_2069	purE	Essential	+	2094963	2095472	509	undisrupted	purE	VK055_2069_purE	Non-essential	Non-essential	Non-essential	Essential	Non-essential	NA
VK055_2074	VK055_2074	Essential	+	2099069	2099182	113	undisrupted	hypothetical protein	VK055_2074_.	NA	NA	NA	NA	NA	NA
VK055_2083	VK055_2083	Essential	+	2107170	2107628	458	undisrupted	nfeD-like C-terminal, partner-binding family protein	VK055_2083_.	NA	NA	NA	NA	NA	NA
VK055_2086	ybaK	Essential	+	2111772	2112251	479	undisrupted	cys-tRNAPro and Cys-tRNACys deacylase	VK055_2086_ybaK	NA	NA	NA	NA	NA	NA
VK055_2089	VK055_2089	Essential	-	2115660	2115782	122	undisrupted	hypothetical protein	VK055_2089_.	NA	NA	NA	NA	NA	NA
VK055_2092	hemH	Essential	-	2118831	2119793	962	undisrupted	ferrochelatase	VK055_2092_hemH	NA	Non-essential	Non-essential	Non-essential	Non-essential	NA
VK055_2093	adk	Essential	-	2119922	2120566	644	undisrupted	adenylate kinase	VK055_2093_adk	Non-essential	Non-essential	Non-essential	Non-essential	Essential	NA
VK055_2095	recR	Essential	-	2122775	2123380	605	undisrupted	recombination protein RecR	VK055_2095_recR	NA	NA	NA	NA	NA	NA
VK055_2096	VK055_2096	Essential	-	2123380	2123712	332	undisrupted	DNA-binding protein, YbaB/EbfC family	VK055_2096_.	NA	NA	NA	NA	NA	NA
VK055_2097	dnaX	Essential	-	2123770	2125677	1907	undisrupted	DNA polymerase III, subunit gamma and tau	VK055_2097_dnaX	NA	NA	NA	NA	NA	NA
VK055_2099	VK055_2099	Essential	-	2126472	2126849	377	undisrupted	hypothetical protein	VK055_2099_.	NA	NA	NA	NA	NA	NA
VK055_2109	VK055_2109	Essential	-	2139081	2139221	140	undisrupted	hypothetical protein	VK055_2109_.	NA	NA	NA	NA	NA	NA
VK055_2116	lacI2	Essential	-	2142453	2143523	1070	undisrupted	lacI transcriptional repressor	VK055_2116_lacI2	NA	NA	Non-essential	NA	NA	NA
VK055_2126	VK055_2126	Essential	-	2153891	2154004	113	undisrupted	hypothetical protein	VK055_2126_.	NA	NA	NA	NA	NA	NA
VK055_2128	rcnR	Essential	-	2155636	2155881	245	undisrupted	rcnR transcriptional repressor	VK055_2128_rcnR	NA	NA	NA	NA	NA	NA
VK055_2133	VK055_2133	Essential	-	2159458	2159715	257	undisrupted	hypothetical protein	VK055_2133_.	NA	NA	NA	NA	NA	NA
VK055_2148	VK055_2148	Essential	-	2174011	2174157	146	undisrupted	competence ComEA helix-hairpin-helix repeat region domain protein	VK055_2148_.	NA	NA	NA	NA	NA	NA
VK055_2149	VK055_2149	Essential	-	2174154	2174378	224	undisrupted	hypothetical protein	VK055_2149_.	NA	NA	NA	NA	NA	NA
VK055_2151	hupB	Essential	-	2176616	2176888	272	undisrupted	DNA-binding protein HU-&beta, NS1	VK055_2151_hupB	NA	NA	NA	NA	NA	NA
VK055_2156	VK055_2156	Essential	-	2183599	2183778	179	undisrupted	hypothetical protein	VK055_2156_.	NA	NA	NA	NA	NA	NA
VK055_2158	VK055_2158	Essential	+	2184358	2184936	578	undisrupted	hypothetical protein	VK055_2158_.	NA	NA	NA	NA	NA	NA
VK055_2163	cyoD	Essential	+	2190491	2190820	329	undisrupted	cytochrome o ubiquinol oxidase subunit IV	VK055_2163_cyoD	Non-essential	Non-essential	Non-essential	Non-essential	NA	NA
VK055_2166	VK055_2166	Essential	-	2192340	2193098	758	undisrupted	bacterial transcriptional regulator family protein	VK055_2166_.	NA	NA	NA	NA	NA	NA
VK055_2168	VK055_2168	Essential	+	2194069	2195745	1676	undisrupted	glucose inhibited division A family protein	VK055_2168_.	NA	NA	NA	NA	NA	NA
VK055_2175	yajQ	Essential	-	2203116	2203607	491	undisrupted	nucleotide binding protein	VK055_2175_yajQ	NA	NA	NA	NA	NA	NA
VK055_2178	VK055_2178	Essential	+	2205509	2205802	293	undisrupted	hypothetical protein	VK055_2178_.	NA	NA	NA	NA	NA	NA
VK055_2180	xseB	Essential	+	2207499	2207741	242	undisrupted	exodeoxyribonuclease VII, small subunit	VK055_2180_xseB	NA	NA	NA	NA	NA	NA
VK055_2181	ispA	Essential	+	2207742	2208641	899	undisrupted	geranyltranstransferase	VK055_2181_ispA	Non-essential	Non-essential	Essential	NA	Essential	NA
VK055_2184	VK055_2184	Essential	-	2211603	2212001	398	undisrupted	phosphatidylglycerophosphatase A family protein	VK055_2184_.	NA	Non-essential	Non-essential	Non-essential	NA	NA
VK055_2185	thiL	Essential	-	2212099	2213070	971	undisrupted	thiamine-monophosphate kinase	VK055_2185_thiL	Non-essential	Non-essential	Non-essential	Non-essential	Essential	NA
VK055_2186	nusB	Essential	-	2213142	2213561	419	undisrupted	transcription antitermination factor NusB	VK055_2186_nusB	NA	NA	NA	NA	NA	NA
VK055_2187	ribH	Essential	-	2213581	2214051	470	undisrupted	6,7-dimethyl-8-ribityllumazine synthase	VK055_2187_ribH	Non-essential	Non-essential	Essential	NA	Non-essential	NA
VK055_2188	ribD	Essential	-	2214139	2215242	1103	undisrupted	riboflavin biosynthesis protein RibD	VK055_2188_ribD	Non-essential	Non-essential	Essential	NA	Non-essential	NA
VK055_2189	nrdR	Essential	-	2215246	2215554	308	undisrupted	transcriptional regulator NrdR	VK055_2189_nrdR	NA	NA	NA	NA	NA	NA
VK055_2195	secD	Essential	-	2219823	2221637	1814	undisrupted	secD	VK055_2195_secD	NA	NA	NA	NA	NA	NA
VK055_2196	yajC	Essential	-	2221697	2222029	332	undisrupted	preprotein translocase, YajC subunit	VK055_2196_yajC	NA	NA	NA	NA	NA	NA
VK055_2208	VK055_2208	Essential	-	2232284	2232829	545	undisrupted	antibiotic biosynthesis monooxygenase family protein	VK055_2208_.	NA	NA	NA	NA	NA	NA
VK055_2214	VK055_2214	Essential	-	2239838	2239957	119	undisrupted	hypothetical protein	VK055_2214_.	NA	NA	NA	NA	NA	NA
VK055_2219	VK055_2219	Essential	-	2246587	2247501	914	undisrupted	glucokinase family protein	VK055_2219_.	Non-essential	Non-essential	Non-essential	Non-essential	Non-essential	NA
VK055_2220	rdgC	Essential	+	2247593	2248504	911	undisrupted	nonspecific DNA binding protein; nucleoid component	VK055_2220_rdgC	NA	NA	NA	NA	NA	NA
VK055_2223	VK055_2223	Essential	-	2249869	2250024	155	undisrupted	hypothetical protein	VK055_2223_.	NA	NA	NA	NA	NA	NA
VK055_2230	iraP	Essential	-	2255081	2255341	260	undisrupted	anti-adaptor protein for sigmaS stabilization	VK055_2230_iraP	NA	NA	NA	NA	NA	NA
VK055_2236	VK055_2236	Essential	+	2259378	2259680	302	undisrupted	hypothetical protein	VK055_2236_.	NA	NA	NA	NA	NA	NA
VK055_2240	hemB	Essential	+	2264138	2265112	974	undisrupted	porphobilinogen synthase	VK055_2240_hemB	Non-essential	Non-essential	Non-essential	Non-essential	Essential	NA
VK055_2244	VK055_2244	Essential	-	2268994	2269761	767	undisrupted	ABC transporter family protein	VK055_2244_.	Non-essential	Non-essential	Non-essential	NA	Non-essential	NA
VK055_2260	VK055_2260	Essential	+	2284492	2285235	743	undisrupted	amino ABC transporter, permease , 3-TM region, His/Glu/Gln/Arg/opine family domain protein	VK055_2260_.	NA	NA	Non-essential	Non-essential	NA	NA
VK055_2269	phnD	Essential	+	2294436	2295362	926	undisrupted	phosphonate ABC transporter, periplasmic phosphonate binding protein	VK055_2269_phnD	NA	NA	NA	NA	NA	NA
VK055_2272	VK055_2272	Essential	-	2297633	2298418	785	undisrupted	putative transposase	VK055_2272_.	NA	NA	NA	NA	NA	NA
VK055_2273	VK055_2273	Essential	-	2298475	2298996	521	undisrupted	transposase family protein	VK055_2273_.	NA	NA	NA	NA	NA	NA
VK055_2274	VK055_2274	Essential	+	2299175	2299345	170	undisrupted	putative transcriptional regulator	VK055_2274_.	NA	NA	NA	NA	NA	NA
VK055_2276	VK055_2276	Essential	-	2300569	2301438	869	undisrupted	eamA-like transporter family protein	VK055_2276_.	NA	NA	NA	NA	NA	NA
VK055_2282	VK055_2282	Essential	+	2306285	2306360	75	undisrupted	NA	VK055_2282_.	NA	NA	NA	NA	NA	NA
VK055_2283	VK055_2283	Essential	-	2307369	2307647	278	undisrupted	hypothetical protein	VK055_2283_.	NA	NA	NA	NA	NA	NA
VK055_2284	VK055_2284	Essential	-	2308262	2308513	251	undisrupted	putative transcriptional regulator	VK055_2284_.	NA	NA	NA	NA	NA	NA
VK055_2289	VK055_2289	Essential	-	2315426	2315998	572	undisrupted	gram-negative pili assembly chaperone, C-terminal domain protein	VK055_2289_.	NA	NA	NA	NA	NA	NA
VK055_2290	fim	Essential	-	2316804	2317184	380	undisrupted	fimbrial subunit type 1	VK055_2290_fim	NA	NA	NA	NA	NA	NA
VK055_2291	VK055_2291	Essential	+	2318214	2318327	113	undisrupted	hypothetical protein	VK055_2291_.	NA	NA	NA	NA	NA	NA
VK055_2297	VK055_2297	Essential	+	2326609	2326824	215	undisrupted	putative zinc ribbon domain protein	VK055_2297_.	NA	NA	NA	NA	NA	NA
VK055_2299	VK055_2299	Essential	+	2328146	2328697	551	undisrupted	glycerol-3-phosphate responsive antiterminator family protein	VK055_2299_.	NA	NA	Non-essential	NA	NA	NA
VK055_2314	VK055_2314	Essential	-	2343218	2343583	365	undisrupted	crl transcriptional regulator	VK055_2314_.	NA	NA	NA	NA	NA	NA
VK055_2316	gpt	Essential	-	2345024	2345482	458	undisrupted	gpt	VK055_2316_gpt	Non-essential	Non-essential	Non-essential	Non-essential	Non-essential	NA
VK055_2318	VK055_2318	Essential	-	2347240	2347692	452	undisrupted	acetyltransferase family protein	VK055_2318_.	NA	NA	NA	NA	NA	NA
VK055_2320	VK055_2320	Essential	+	2348910	2349770	860	undisrupted	glycerophosphoryl diester phosphodiesterase family protein	VK055_2320_.	NA	NA	Non-essential	Non-essential	NA	NA
VK055_2321	VK055_2321	Essential	-	2349993	2350208	215	undisrupted	hypothetical protein	VK055_2321_.	NA	NA	NA	NA	NA	NA
VK055_2324	nqrD	Essential	-	2352050	2352670	620	undisrupted	ubiquinone oxidoreductase, Na(+)-translocating, D subunit	VK055_2324_nqrD	Non-essential	Non-essential	Non-essential	Non-essential	NA	NA
VK055_2330	gmhA	Essential	-	2358018	2358599	581	undisrupted	phosphoheptose isomerase	VK055_2330_gmhA	Essential	Essential	NA	Non-essential	Non-essential	NA
VK055_2335	VK055_2335	Essential	-	2363898	2363974	76	undisrupted	NA	VK055_2335_.	NA	NA	NA	NA	NA	NA
VK055_2336	dnaQ	Essential	-	2364108	2364839	731	undisrupted	DNA polymerase III, epsilon subunit	VK055_2336_dnaQ	NA	NA	NA	NA	NA	NA
VK055_2338	rnhA	Essential	+	2364904	2365371	467	undisrupted	ribonuclease HI	VK055_2338_rnhA	NA	NA	NA	NA	NA	NA
VK055_2346	VK055_2346	Essential	-	2373351	2373427	76	undisrupted	NA	VK055_2346_.	NA	NA	NA	NA	NA	NA
VK055_2347	VK055_2347	Essential	-	2373485	2373597	112	undisrupted	NA	VK055_2347_.	NA	NA	NA	NA	NA	NA
VK055_2348	VK055_2348	Essential	-	2373798	2376695	2897	undisrupted	NA	VK055_2348_.	NA	NA	NA	NA	NA	NA
VK055_2349	VK055_2349	Essential	-	2376868	2376943	75	undisrupted	NA	VK055_2349_.	NA	NA	NA	NA	NA	NA
VK055_2350	VK055_2350	Essential	-	2377049	2377125	76	undisrupted	NA	VK055_2350_.	NA	NA	NA	NA	NA	NA
VK055_2351	VK055_2351	Essential	-	2377203	2378728	1525	undisrupted	NA	VK055_2351_.	NA	NA	NA	NA	NA	NA
VK055_2358	proS	Essential	+	2383729	2385447	1718	undisrupted	proline--tRNA ligase	VK055_2358_proS	Non-essential	Non-essential	NA	NA	Non-essential	NA
VK055_2361	VK055_2361	Essential	-	2387221	2387634	413	undisrupted	putative-tRNA hydrolase domain protein	VK055_2361_.	NA	NA	NA	NA	NA	NA
VK055_2363	yaeO	Essential	+	2388566	2388820	254	undisrupted	modulator of Rho-dependent transcription termination	VK055_2363_yaeO	NA	NA	NA	NA	NA	NA
VK055_2364	VK055_2364	Essential	-	2388834	2390135	1301	undisrupted	hypothetical protein	VK055_2364_.	NA	NA	NA	NA	NA	NA
VK055_2367	accA	Essential	-	2392904	2393863	959	undisrupted	acetyl-CoA carboxylase, carboxyl transferase, alpha subunit	VK055_2367_accA	Essential	Non-essential	Non-essential	Essential	Non-essential	NA
VK055_2368	VK055_2368	Essential	-	2393876	2397358	3482	undisrupted	DNA polymerase III, &alpha subunit	VK055_2368_.	NA	NA	NA	NA	NA	NA
VK055_2369	VK055_2369	Essential	-	2397376	2397975	599	undisrupted	ribonuclease HII family protein	VK055_2369_.	NA	NA	NA	NA	NA	NA
VK055_2370	lpxB	Essential	-	2397972	2399123	1151	undisrupted	lipid-A-disaccharide synthase	VK055_2370_lpxB	Essential	Essential	NA	Essential	Essential	NA
VK055_2371	lpxA	Essential	-	2399123	2399911	788	undisrupted	acyl-[acyl-carrier-protein]-UDP-N-acetylglucosamine O-acyltransferase	VK055_2371_lpxA	Essential	Essential	NA	Non-essential	Essential	NA
VK055_2372	fabZ	Essential	-	2399915	2400370	455	undisrupted	beta-hydroxyacyl-(acyl-carrier-protein) dehydratase FabZ	VK055_2372_fabZ	Non-essential	Non-essential	Non-essential	Non-essential	Non-essential	NA
VK055_2374	hlpA	Essential	-	2401505	2401951	446	undisrupted	periplasmic chaperone	VK055_2374_hlpA	NA	NA	NA	NA	NA	NA
VK055_2375	yaeT	Essential	-	2402112	2404541	2429	undisrupted	outer membrane assembly complex, YaeT protein	VK055_2375_yaeT	NA	NA	NA	NA	NA	NA
VK055_2376	rseP	Essential	-	2404573	2405925	1352	undisrupted	RIP metalloprotease RseP	VK055_2376_rseP	NA	NA	NA	NA	NA	NA
VK055_2377	VK055_2377	Essential	-	2405937	2406794	857	undisrupted	cytidylyltransferase family protein	VK055_2377_.	Essential	Non-essential	Non-essential	Essential	Essential	NA
VK055_2378	uppS	Essential	-	2406807	2407565	758	undisrupted	di-trans,poly-cis-decaprenylcistransferase	VK055_2378_uppS	Non-essential	Non-essential	Essential	NA	Essential	NA
VK055_2379	dxr	Essential	-	2407803	2409005	1202	undisrupted	1-deoxy-D-xylulose 5-phosphate reductoisomerase	VK055_2379_dxr	Non-essential	Non-essential	Essential	NA	Essential	NA
VK055_2380	frr	Essential	-	2409234	2409791	557	undisrupted	ribosome recycling factor	VK055_2380_frr	NA	NA	NA	NA	NA	NA
VK055_2381	pyrH	Essential	-	2409942	2410667	725	undisrupted	UMP kinase	VK055_2381_pyrH	Non-essential	Non-essential	Non-essential	Non-essential	Essential	NA
VK055_2382	tsf	Essential	-	2410818	2411669	851	undisrupted	translation elongation factor Ts	VK055_2382_tsf	NA	NA	NA	NA	NA	NA
VK055_2383	rpsB	Essential	-	2411789	2412499	710	undisrupted	ribosomal protein S2	VK055_2383_rpsB	NA	NA	NA	NA	NA	NA
VK055_2386	dapD	Essential	+	2416383	2417207	824	undisrupted	2,3,4,5-tetrahydropyridine-2,6-dicarboxylate N-succinyltransferase	VK055_2386_dapD	Essential	Non-essential	Essential	Essential	Essential	NA
VK055_2387	VK055_2387	Essential	+	2417315	2417701	386	undisrupted	hypothetical protein	VK055_2387_.	NA	NA	NA	NA	NA	NA
VK055_2388	cdaR	Essential	-	2417820	2418977	1157	undisrupted	cdaR transcriptional activator	VK055_2388_cdaR	NA	NA	NA	NA	NA	NA
VK055_2389	htrA	Essential	-	2419144	2420445	1301	undisrupted	degP	VK055_2389_htrA	NA	NA	NA	NA	Non-essential	NA
VK055_2391	mtnN	Essential	+	2422310	2423008	698	undisrupted	MTA/SAH nucleosidase	VK055_2391_mtnN	Non-essential	Non-essential	Non-essential	NA	Essential	NA
VK055_2393	VK055_2393	Essential	+	2423838	2424461	623	undisrupted	hypothetical protein	VK055_2393_.	NA	NA	NA	NA	NA	NA
VK055_2394	VK055_2394	Essential	-	2424533	2424877	344	undisrupted	essential respiratory protein A	VK055_2394_.	NA	NA	NA	NA	NA	NA
VK055_2396	hemL	Essential	+	2426558	2427838	1280	undisrupted	glutamate-1-semialdehyde-2,1-aminomutase	VK055_2396_hemL	Non-essential	Non-essential	Non-essential	Non-essential	Essential	NA
VK055_2398	VK055_2398	Essential	-	2429954	2430844	890	undisrupted	periplasmic binding family protein	VK055_2398_.	Non-essential	Non-essential	Non-essential	NA	NA	NA
VK055_2403	VK055_2403	Essential	+	2437302	2437646	344	undisrupted	lipo, PulS/OutS family protein	VK055_2403_.	NA	NA	NA	NA	NA	NA
VK055_2406	VK055_2406	Essential	+	2441992	2442129	137	undisrupted	hypothetical protein	VK055_2406_.	NA	NA	NA	NA	NA	NA
VK055_2411	gspG	Essential	+	2447654	2448088	434	undisrupted	type II secretion system protein G	VK055_2411_gspG	NA	NA	NA	NA	NA	NA
VK055_2413	gspI	Essential	+	2448600	2448965	365	undisrupted	type II secretion system protein I	VK055_2413_gspI	NA	NA	NA	NA	NA	NA
VK055_2414	gspJ	Essential	+	2448962	2449558	596	undisrupted	type II secretion system protein J	VK055_2414_gspJ	NA	NA	NA	NA	NA	NA
VK055_2417	VK055_2417	Essential	+	2451714	2452199	485	undisrupted	type II secretion system (T2SS), M family protein	VK055_2417_.	NA	NA	NA	NA	NA	NA
VK055_2419	outO	Essential	+	2452932	2453732	800	undisrupted	type 4 prepilin-like proteins leader peptide-processing enzyme	VK055_2419_outO	NA	NA	NA	NA	NA	NA
VK055_2421	VK055_2421	Essential	+	2456282	2456818	536	undisrupted	2'-5' RNA ligase	VK055_2421_.	NA	NA	NA	NA	NA	NA
VK055_2425	pcnB	Essential	+	2459240	2460550	1310	undisrupted	poly(A) polymerase I	VK055_2425_pcnB	NA	NA	NA	NA	Non-essential	NA
VK055_2426	folK	Essential	+	2460547	2461026	479	undisrupted	2-amino-4-hydroxy-6-hydroxymethyldihydropteridine diphosphokinase	VK055_2426_folK	Non-essential	Non-essential	Essential	NA	Non-essential	NA
VK055_2431	VK055_2431	Essential	-	2464625	2465065	440	undisrupted	PTS system fructose IIA component family protein	VK055_2431_.	NA	NA	NA	NA	NA	NA
VK055_2433	yadG	Essential	-	2465955	2466881	926	undisrupted	yadG	VK055_2433_yadG	NA	NA	Non-essential	NA	NA	NA
VK055_2436	VK055_2436	Essential	-	2468329	2468448	119	undisrupted	hypothetical protein	VK055_2436_.	NA	NA	NA	NA	NA	NA
VK055_2439	VK055_2439	Essential	+	2472759	2473106	347	undisrupted	bacterial chaperone lipo family protein	VK055_2439_.	NA	NA	NA	NA	NA	NA
VK055_2446	VK055_2446	Essential	-	2480963	2481091	128	undisrupted	hypothetical protein	VK055_2446_.	NA	NA	NA	NA	NA	NA
VK055_2450	lpdA2	Essential	-	2484104	2485528	1424	undisrupted	dihydrolipoyl dehydrogenase	VK055_2450_lpdA2	Non-essential	Non-essential	Non-essential	Non-essential	Non-essential	NA
VK055_2454	VK055_2454	Essential	-	2491745	2491858	113	undisrupted	hypothetical protein	VK055_2454_.	NA	NA	NA	NA	NA	NA
VK055_2459	ampD	Essential	-	2496869	2497432	563	undisrupted	1,6-anhydro-N-acetylmuramyl-L-alanine amidase AmpD	VK055_2459_ampD	Non-essential	Non-essential	Non-essential	NA	Non-essential	NA
VK055_2461	VK055_2461	Essential	+	2498641	2499072	431	undisrupted	prepilin-type N-terminal cleavage/methylation domain protein	VK055_2461_.	NA	NA	NA	NA	NA	NA
VK055_2465	coaE	Essential	+	2503087	2503707	620	undisrupted	dephospho-CoA kinase	VK055_2465_coaE	Non-essential	Non-essential	Essential	NA	Essential	NA
VK055_2469	secA	Essential	-	2505158	2507863	2705	undisrupted	preprotein translocase, SecA subunit	VK055_2469_secA	NA	NA	NA	NA	NA	NA
VK055_2470	VK055_2470	Essential	-	2507926	2508423	497	undisrupted	secretion monitor family protein	VK055_2470_.	NA	NA	NA	NA	NA	NA
VK055_2471	lpxC	Essential	-	2508746	2509663	917	undisrupted	UDP-3-O-[3-hydroxymyristoyl] N-acetylglucosaminedeacetylase	VK055_2471_lpxC	Essential	Essential	NA	Essential	Essential	NA
VK055_2472	ftsZ	Essential	-	2509764	2510903	1139	undisrupted	cell division protein FtsZ	VK055_2472_ftsZ	NA	NA	NA	NA	NA	NA
VK055_2473	ftsA	Essential	-	2510978	2512240	1262	undisrupted	cell division protein FtsA	VK055_2473_ftsA	NA	NA	NA	NA	NA	NA
VK055_2474	ftsQ	Essential	-	2512237	2513067	830	undisrupted	cell division protein FtsQ	VK055_2474_ftsQ	NA	NA	Non-essential	Non-essential	NA	NA
VK055_2475	ddlB	Essential	-	2513069	2513989	920	undisrupted	ddlB	VK055_2475_ddlB	Non-essential	Essential	Non-essential	Non-essential	Essential	NA
VK055_2476	murC	Essential	-	2513982	2515412	1430	undisrupted	UDP-N-acetylmuramate--alanine ligase	VK055_2476_murC	Essential	Non-essential	Essential	Essential	Essential	NA
VK055_2477	murG	Essential	-	2515505	2516575	1070	undisrupted	undecaprenyldiphospho-muramoylpentapeptide beta-N-acetylglucosaminyltransferase	VK055_2477_murG	Essential	Essential	Essential	Essential	Essential	NA
VK055_2478	VK055_2478	Essential	+	2515389	2515508	119	undisrupted	hypothetical protein	VK055_2478_.	NA	NA	NA	NA	Essential	NA
VK055_2479	ftsW	Essential	-	2516572	2517693	1121	undisrupted	cell division protein FtsW	VK055_2479_ftsW	NA	NA	Non-essential	Non-essential	Essential	NA
VK055_2480	murD	Essential	-	2517846	2519162	1316	undisrupted	UDP-N-acetylmuramoylalanine--D-glutamate ligase	VK055_2480_murD	Essential	Non-essential	Essential	Essential	Essential	NA
VK055_2481	mraY	Essential	-	2519165	2520223	1058	undisrupted	phospho-N-acetylmuramoyl-pentapeptide-transferase	VK055_2481_mraY	Essential	Essential	Essential	Essential	Essential	NA
VK055_2482	VK055_2482	Essential	-	2520241	2521599	1358	undisrupted	UDP-MurNAc-L-Ala-D-Glu-L-Lys:D-Ala-D-Ala ligase	VK055_2482_.	Essential	Essential	Essential	Essential	Essential	NA
VK055_2483	VK055_2483	Essential	-	2521596	2523011	1415	undisrupted	UDP-N-acetylmuramyl tripeptide synthase	VK055_2483_.	Essential	Non-essential	Essential	Essential	Essential	NA
VK055_2484	ftsI2	Essential	-	2523070	2524836	1766	undisrupted	essential cell division FtsI; penicillin-bindingprotein 3	VK055_2484_ftsI2	Non-essential	Non-essential	Non-essential	Non-essential	Non-essential	NA
VK055_2485	ftsL	Essential	-	2524852	2525061	209	undisrupted	cell division protein FtsL	VK055_2485_ftsL	NA	NA	NA	NA	NA	NA
VK055_2486	mraW	Essential	-	2525214	2526155	941	undisrupted	S-adenosyl-methyltransferase MraW	VK055_2486_mraW	NA	NA	Non-essential	Non-essential	NA	NA
VK055_2487	VK055_2487	Essential	-	2526158	2526616	458	undisrupted	mraZ family protein	VK055_2487_.	NA	NA	NA	NA	NA	NA
VK055_2491	VK055_2491	Essential	-	2531055	2531939	884	undisrupted	bacterial regulatory helix-turn-helix , lysR family protein	VK055_2491_.	NA	NA	NA	NA	NA	NA
VK055_2492	VK055_2492	Essential	-	2532374	2532502	128	undisrupted	hypothetical protein	VK055_2492_.	NA	NA	NA	NA	NA	NA
VK055_2497	VK055_2497	Essential	+	2537896	2539929	2033	undisrupted	NADH:flavin oxidoreductase / NADH oxidase familyprotein	VK055_2497_.	NA	NA	NA	NA	Non-essential	NA
VK055_2500	aroD	Essential	+	2542060	2542815	755	undisrupted	3-dehydroquinate dehydratase	VK055_2500_aroD	Non-essential	Non-essential	Non-essential	Non-essential	Non-essential	NA
VK055_2504	VK055_2504	Essential	-	2546807	2546929	122	undisrupted	hypothetical protein	VK055_2504_.	NA	NA	NA	NA	NA	NA
VK055_2510	araC	Essential	-	2553099	2553944	845	undisrupted	araC	VK055_2510_araC	NA	NA	NA	NA	NA	NA
VK055_2511	VK055_2511	Essential	+	2553930	2554100	170	undisrupted	hypothetical protein	VK055_2511_.	NA	NA	NA	NA	NA	NA
VK055_2522	VK055_2522	Essential	-	2569465	2570292	827	undisrupted	dnaJ domain protein	VK055_2522_.	NA	NA	NA	NA	NA	NA
VK055_2523	lptD	Essential	+	2570662	2572884	2222	undisrupted	exported protein required for envelope biosynthesis and integrity	VK055_2523_lptD	NA	NA	NA	NA	NA	NA
VK055_2527	apaG	Essential	+	2576041	2576418	377	undisrupted	protein ApaG	VK055_2527_apaG	NA	NA	NA	NA	NA	NA
VK055_2529	dyrA	Essential	-	2577690	2578169	479	undisrupted	dihydrofolate reductase	VK055_2529_dyrA	Non-essential	Non-essential	Non-essential	Non-essential	Non-essential	NA
VK055_2535	VK055_2535	Essential	+	2585725	2585880	155	undisrupted	hypothetical protein	VK055_2535_.	NA	NA	NA	NA	NA	NA
VK055_2536	dapB	Essential	-	2586116	2586937	821	undisrupted	dihydrodipicolinate reductase	VK055_2536_dapB	Essential	Non-essential	Essential	Essential	Essential	NA
VK055_2543	oadG	Essential	+	2593601	2593852	251	undisrupted	oxaloacetate decarboxylase gamma chain	VK055_2543_oadG	Non-essential	Non-essential	Non-essential	Non-essential	NA	NA
VK055_2552	VK055_2552	Essential	-	2603400	2603849	449	undisrupted	FKBP-type peptidyl-prolyl cis-trans isomerase family protein	VK055_2552_.	NA	NA	NA	NA	NA	NA
VK055_2553	lspA	Essential	-	2603965	2604465	500	undisrupted	signal peptidase II	VK055_2553_lspA	NA	NA	NA	NA	NA	NA
VK055_2554	ileS	Essential	-	2604465	2607281	2816	undisrupted	isoleucine--tRNA ligase	VK055_2554_ileS	Non-essential	Non-essential	NA	NA	Non-essential	NA
VK055_2555	ribF	Essential	-	2607325	2608212	887	undisrupted	riboflavin biosynthesis protein RibF	VK055_2555_ribF	Non-essential	Non-essential	Essential	NA	Essential	NA
VK055_2556	rpsT	Essential	+	2608671	2608856	185	undisrupted	ribosomal protein S20	VK055_2556_rpsT	NA	NA	NA	NA	NA	NA
VK055_2560	dnaK	Essential	-	2612501	2614417	1916	undisrupted	chaperone protein DnaK	VK055_2560_dnaK	NA	NA	Non-essential	Non-essential	Non-essential	NA
VK055_2568	VK055_2568	Essential	+	2621477	2622250	773	undisrupted	hypothetical protein	VK055_2568_.	NA	NA	NA	NA	NA	NA
VK055_2575	arcA	Essential	+	2629369	2630085	716	undisrupted	arcA transcriptional dual regulator	VK055_2575_arcA	NA	NA	Non-essential	NA	NA	NA
VK055_2582	trpR	Essential	-	2636505	2636834	329	undisrupted	trp operon repressor	VK055_2582_trpR	NA	NA	NA	NA	NA	NA
VK055_2603	holD	Essential	-	2658392	2658805	413	undisrupted	DNA polymerase III, psi subunit	VK055_2603_holD	NA	NA	NA	NA	NA	NA
VK055_2605	VK055_2605	Essential	+	2660108	2660194	86	undisrupted	NA	VK055_2605_.	NA	NA	NA	NA	NA	NA
VK055_2606	VK055_2606	Essential	+	2660223	2660309	86	undisrupted	NA	VK055_2606_.	NA	NA	NA	NA	NA	NA
VK055_2607	VK055_2607	Essential	+	2660341	2660427	86	undisrupted	NA	VK055_2607_.	NA	NA	NA	NA	NA	NA
VK055_2608	VK055_2608	Essential	-	2660449	2660802	353	undisrupted	hypothetical protein	VK055_2608_.	NA	NA	NA	NA	NA	NA
VK055_2609	VK055_2609	Essential	+	2660792	2660929	137	undisrupted	hypothetical protein	VK055_2609_.	NA	NA	NA	NA	NA	NA
VK055_2613	VK055_2613	Essential	+	2664625	2665083	458	undisrupted	ybaK / prolyl-tRNA synthetases associated domainprotein	VK055_2613_.	NA	NA	NA	NA	NA	NA
VK055_2618	VK055_2618	Essential	-	2668821	2669000	179	undisrupted	hypothetical protein	VK055_2618_.	NA	NA	NA	NA	NA	NA
VK055_2620	VK055_2620	Essential	+	2669840	2670313	473	undisrupted	hypothetical protein	VK055_2620_.	NA	NA	NA	NA	Non-essential	NA
VK055_2621	dnaT	Essential	+	2670416	2670955	539	undisrupted	dnaT	VK055_2621_dnaT	NA	NA	NA	NA	NA	NA
VK055_2623	VK055_2623	Essential	+	2671761	2672252	491	undisrupted	hypothetical protein	VK055_2623_.	NA	NA	NA	NA	NA	NA
VK055_2647	VK055_2647	Essential	-	2698513	2698647	134	undisrupted	hypothetical protein	VK055_2647_.	NA	NA	NA	NA	NA	NA
VK055_2648	VK055_2648	Essential	-	2698684	2698995	311	undisrupted	hypothetical protein	VK055_2648_.	NA	NA	NA	NA	NA	NA
VK055_2654	hpcD	Essential	+	2703434	2703814	380	undisrupted	5-carboxymethyl-2-hydroxymuconate Delta-isomerase	VK055_2654_hpcD	Non-essential	Non-essential	Non-essential	NA	NA	NA
VK055_2658	hpaA	Essential	+	2706924	2707814	890	undisrupted	4-hydroxyphenylacetate catabolism regulatory protein HpaA	VK055_2658_hpaA	NA	NA	NA	NA	NA	NA
VK055_2672	VK055_2672	Essential	+	2722058	2723296	1238	undisrupted	sugar (and other) transporter family protein	VK055_2672_.	NA	NA	NA	NA	NA	NA
VK055_2680	VK055_2680	Essential	-	2728592	2728756	164	undisrupted	hypothetical protein	VK055_2680_.	NA	NA	NA	NA	NA	NA
VK055_2683	VK055_2683	Essential	-	2730831	2731739	908	undisrupted	bacterial regulatory helix-turn-helix , lysR family protein	VK055_2683_.	NA	NA	NA	NA	NA	NA
VK055_2684	nqo2	Essential	+	2731826	2732608	782	undisrupted	ribosyldihydronicotinamide dehydrogenase (quinone)	VK055_2684_nqo2	NA	NA	Non-essential	Non-essential	NA	NA
VK055_2696	VK055_2696	Essential	-	2746301	2746413	112	undisrupted	NA	VK055_2696_.	NA	NA	NA	NA	NA	NA
VK055_2697	VK055_2697	Essential	-	2746515	2749412	2897	undisrupted	NA	VK055_2697_.	NA	NA	NA	NA	NA	NA
VK055_2698	VK055_2698	Essential	-	2749598	2749673	75	undisrupted	NA	VK055_2698_.	NA	NA	NA	NA	NA	NA
VK055_2699	VK055_2699	Essential	-	2749765	2751290	1525	undisrupted	NA	VK055_2699_.	NA	NA	NA	NA	NA	NA
VK055_2713	VK055_2713	Essential	+	2764936	2765655	719	undisrupted	short chain dehydrogenase family protein	VK055_2713_.	NA	NA	Non-essential	Non-essential	NA	NA
VK055_2719	VK055_2719	Essential	+	2769852	2770403	551	undisrupted	hypothetical protein	VK055_2719_.	NA	NA	NA	NA	NA	NA
VK055_2720	VK055_2720	Essential	+	2770478	2771359	881	undisrupted	hypothetical protein	VK055_2720_.	NA	NA	NA	NA	NA	NA
VK055_2721	VK055_2721	Essential	-	2771545	2772897	1352	undisrupted	lamB porin family protein	VK055_2721_.	NA	NA	NA	NA	NA	NA
VK055_2731	VK055_2731	Essential	-	2783998	2784264	266	undisrupted	transposase family protein	VK055_2731_.	NA	NA	NA	NA	NA	NA
VK055_2734	VK055_2734	Essential	+	2786065	2786298	233	undisrupted	hypothetical protein	VK055_2734_.	NA	NA	NA	NA	NA	NA
VK055_2745	VK055_2745	Essential	-	2807822	2808307	485	undisrupted	hypothetical protein	VK055_2745_.	NA	NA	NA	NA	NA	NA
VK055_2747	VK055_2747	Essential	-	2811005	2812117	1112	undisrupted	radical SAM superfamily protein	VK055_2747_.	NA	NA	NA	NA	NA	NA
VK055_2751	VK055_2751	Essential	+	2816694	2817512	818	undisrupted	hypothetical protein	VK055_2751_.	NA	NA	NA	NA	NA	NA
VK055_2755	VK055_2755	Essential	-	2821061	2822245	1184	undisrupted	hypothetical protein	VK055_2755_.	NA	NA	NA	NA	NA	NA
VK055_2756	VK055_2756	Essential	-	2822766	2823179	413	undisrupted	hypothetical protein	VK055_2756_.	NA	NA	NA	NA	NA	NA
VK055_2757	VK055_2757	Essential	-	2823273	2823434	161	undisrupted	hypothetical protein	VK055_2757_.	NA	NA	NA	NA	NA	NA
VK055_2758	VK055_2758	Essential	-	2823672	2825303	1631	undisrupted	putative conserved DNA-binding protein	VK055_2758_.	NA	NA	NA	NA	NA	NA
VK055_2760	VK055_2760	Essential	-	2826615	2827820	1205	undisrupted	phage integrase family protein	VK055_2760_.	NA	NA	NA	NA	NA	NA
VK055_2761	VK055_2761	Essential	-	2828129	2828245	116	undisrupted	hypothetical protein	VK055_2761_.	NA	NA	NA	NA	NA	NA
VK055_2762	VK055_2762	Essential	-	2828200	2828403	203	undisrupted	prophage CP4-57 regulatory family protein	VK055_2762_.	NA	NA	NA	NA	NA	NA
VK055_2763	VK055_2763	Essential	+	2829052	2829252	200	undisrupted	hypothetical protein	VK055_2763_.	NA	NA	NA	NA	NA	NA
VK055_2764	VK055_2764	Essential	-	2829499	2830350	851	undisrupted	hypothetical protein	VK055_2764_.	NA	NA	NA	NA	NA	NA
VK055_2766	VK055_2766	Essential	-	2831917	2832001	84	undisrupted	NA	VK055_2766_.	NA	NA	NA	NA	NA	NA
VK055_2770	VK055_2770	Essential	+	2836013	2836885	872	undisrupted	binding-protein-dependent transport system innermembrane component family protein	VK055_2770_.	NA	NA	NA	NA	NA	NA
VK055_2772	VK055_2772	Essential	+	2837773	2838597	824	undisrupted	phosphohydrolase	VK055_2772_.	NA	NA	Non-essential	Non-essential	Non-essential	NA
VK055_2782	VK055_2782	Essential	+	2849479	2849610	131	undisrupted	hypothetical protein	VK055_2782_.	NA	NA	NA	NA	NA	NA
VK055_2784	VK055_2784	Essential	+	2850094	2850225	131	undisrupted	hypothetical protein	VK055_2784_.	NA	NA	NA	NA	NA	NA
VK055_2785	VK055_2785	Essential	-	2850681	2851466	785	undisrupted	putative transposase	VK055_2785_.	NA	NA	NA	NA	NA	NA
VK055_2786	VK055_2786	Essential	-	2851523	2852044	521	undisrupted	transposase family protein	VK055_2786_.	NA	NA	NA	NA	NA	NA
VK055_2789	VK055_2789	Essential	+	2855259	2856080	821	undisrupted	putative cytoplasmic protein	VK055_2789_.	NA	NA	NA	NA	NA	NA
VK055_2791	VK055_2791	Essential	-	2857730	2858812	1082	undisrupted	putative permease YjgP/YjgQ family protein	VK055_2791_.	NA	NA	NA	NA	NA	NA
VK055_2792	VK055_2792	Essential	-	2858812	2859909	1097	undisrupted	putative transmembrane possibly involved in transport conserved inner membrane protein	VK055_2792_.	NA	NA	NA	NA	NA	NA
VK055_2793	VK055_2793	Essential	+	2859899	2860018	119	undisrupted	putative ubiquinol oxidase subunit 2	VK055_2793_.	NA	NA	NA	NA	NA	NA
VK055_2795	VK055_2795	Essential	+	2861930	2862373	443	undisrupted	DNA polymerase III chi subunit, HolC family protein	VK055_2795_.	NA	NA	NA	NA	Non-essential	NA
VK055_2796	valS	Essential	+	2862373	2865228	2855	undisrupted	valine--tRNA ligase	VK055_2796_valS	Non-essential	Non-essential	NA	NA	Non-essential	NA
VK055_2809	VK055_2809	Essential	+	2876886	2877272	386	undisrupted	hypothetical protein	VK055_2809_.	NA	NA	NA	NA	NA	NA
VK055_2819	nrdG	Essential	+	2891606	2892070	464	undisrupted	anaerobic ribonucleoside-triphosphate reductase activating protein	VK055_2819_nrdG	Non-essential	Non-essential	Non-essential	Non-essential	NA	NA
VK055_2821	relB	Essential	-	2892348	2892590	242	undisrupted	qin prophage antitoxin of the RelE-RelB toxin-antitoxin system and transcriptional repressor of relBEF	VK055_2821_relB	NA	NA	NA	NA	NA	NA
VK055_2828	VK055_2828	Essential	-	2899558	2900334	776	undisrupted	hypothetical protein	VK055_2828_.	NA	NA	NA	NA	NA	NA
VK055_2837	VK055_2837	Essential	-	2905964	2906491	527	undisrupted	acetyltransferase family protein	VK055_2837_.	NA	NA	NA	NA	NA	NA
VK055_2841	VK055_2841	Essential	-	2910135	2911160	1025	undisrupted	ytfT	VK055_2841_.	Non-essential	Non-essential	Non-essential	NA	NA	NA
VK055_2858	VK055_2858	Essential	-	2931723	2932094	371	undisrupted	hxlR-like helix-turn-helix family protein	VK055_2858_.	NA	NA	NA	NA	NA	NA
VK055_2864	VK055_2864	Essential	-	2937539	2938159	620	undisrupted	FKBP-type peptidyl-prolyl cis-trans isomerase	VK055_2864_.	NA	NA	NA	NA	NA	NA
VK055_2866	rplI	Essential	-	2939161	2939610	449	undisrupted	ribosomal protein L9	VK055_2866_rplI	NA	NA	NA	NA	NA	NA
VK055_2867	rpsR	Essential	-	2939652	2939879	227	undisrupted	ribosomal protein S18	VK055_2867_rpsR	NA	NA	NA	NA	NA	NA
VK055_2868	VK055_2868	Essential	+	2939956	2940096	140	undisrupted	hypothetical protein	VK055_2868_.	NA	NA	NA	NA	NA	NA
VK055_2869	rpsF	Essential	-	2940204	2940599	395	undisrupted	ribosomal protein S6	VK055_2869_rpsF	NA	NA	NA	NA	NA	NA
VK055_2875	ulaC	Essential	-	2944835	2945302	467	undisrupted	ulaC	VK055_2875_ulaC	Non-essential	Non-essential	Non-essential	NA	NA	NA
VK055_2879	yjfP	Essential	-	2949317	2950018	701	undisrupted	esterase	VK055_2879_yjfP	NA	NA	NA	NA	NA	NA
VK055_2890	VK055_2890	Essential	+	2958392	2958682	290	undisrupted	hypothetical protein	VK055_2890_.	NA	NA	NA	NA	NA	NA
VK055_2898	yjeE	Essential	-	2967042	2967491	449	undisrupted	essential protein with weak ATPase activity	VK055_2898_yjeE	NA	NA	NA	NA	NA	NA
VK055_2901	VK055_2901	Essential	-	2970431	2970506	75	undisrupted	NA	VK055_2901_.	NA	NA	NA	NA	NA	NA
VK055_2902	VK055_2902	Essential	-	2970579	2970654	75	undisrupted	NA	VK055_2902_.	NA	NA	NA	NA	NA	NA
VK055_2903	VK055_2903	Essential	-	2970723	2970798	75	undisrupted	NA	VK055_2903_.	NA	NA	NA	NA	NA	NA
VK055_2905	artI3	Essential	+	2971093	2971824	731	undisrupted	artI	VK055_2905_artI3	NA	NA	Non-essential	Non-essential	NA	NA
VK055_2906	yjeR	Essential	-	2971868	2972413	545	undisrupted	oligoribonuclease monomer	VK055_2906_yjeR	NA	NA	NA	NA	NA	NA
VK055_2907	rsgA	Essential	+	2972508	2973569	1061	undisrupted	ribosome small subunit-dependent GTPase A	VK055_2907_rsgA	Non-essential	Non-essential	Non-essential	Non-essential	NA	NA
VK055_2908	psd	Essential	+	2973730	2974692	962	undisrupted	phosphatidylserine decarboxylase	VK055_2908_psd	Essential	Non-essential	Non-essential	Essential	Essential	NA
VK055_2911	VK055_2911	Essential	-	2979768	2980745	977	undisrupted	EF-P lysine aminoacylase GenX	VK055_2911_.	NA	NA	NA	NA	NA	NA
VK055_2919	efp	Essential	-	2985930	2986496	566	undisrupted	translation elongation factor P	VK055_2919_efp	NA	NA	NA	NA	NA	NA
VK055_2920	VK055_2920	Essential	+	2986604	2987566	962	undisrupted	kamA family protein	VK055_2920_.	NA	NA	NA	NA	NA	NA
VK055_2930	groL	Essential	-	3000587	3002233	1646	undisrupted	chaperonin GroL	VK055_2930_groL	NA	NA	NA	NA	NA	NA
VK055_2931	groS	Essential	-	3002271	3002537	266	undisrupted	groES	VK055_2931_groS	NA	NA	NA	NA	NA	NA
VK055_2932	VK055_2932	Essential	+	3002599	3002745	146	undisrupted	hypothetical protein	VK055_2932_.	NA	NA	NA	NA	NA	NA
VK055_2934	VK055_2934	Essential	-	3004098	3004574	476	undisrupted	fxsA cytoplasmic membrane family protein	VK055_2934_.	NA	NA	NA	NA	NA	NA
VK055_2941	VK055_2941	Essential	+	3012867	3012942	75	undisrupted	NA	VK055_2941_.	NA	NA	NA	NA	NA	NA
VK055_2945	VK055_2945	Essential	-	3016543	3016752	209	undisrupted	perC transcriptional activator family protein	VK055_2945_.	NA	NA	NA	NA	NA	NA
VK055_2947	VK055_2947	Essential	+	3017028	3017150	122	undisrupted	hypothetical protein	VK055_2947_.	NA	NA	NA	NA	NA	NA
VK055_2951	pgaD	Essential	+	3024137	3024586	449	undisrupted	poly-beta-1,6-N-acetyl-D-glucosamine biosynthesis protein PgaD	VK055_2951_pgaD	NA	NA	NA	NA	NA	NA
VK055_2953	VK055_2953	Essential	-	3026283	3026396	113	undisrupted	hypothetical protein	VK055_2953_.	NA	NA	NA	NA	NA	NA
VK055_2956	VK055_2956	Essential	+	3027374	3027694	320	undisrupted	merR HTH regulatory family protein	VK055_2956_.	NA	NA	NA	NA	NA	NA
VK055_2959	VK055_2959	Essential	-	3030009	3030170	161	undisrupted	hypothetical protein	VK055_2959_.	NA	NA	NA	NA	NA	NA
VK055_2964	VK055_2964	Essential	+	3036369	3036647	278	undisrupted	phnA family protein	VK055_2964_.	NA	NA	NA	NA	NA	NA
VK055_2968	phnH	Essential	+	3038641	3039225	584	undisrupted	phosphonate C-P lyase system protein PhnH	VK055_2968_phnH	NA	NA	NA	NA	NA	NA
VK055_2971	phnK	Essential	+	3041128	3041886	758	undisrupted	phosphonate C-P lyase system protein PhnK	VK055_2971_phnK	NA	NA	NA	NA	NA	NA
VK055_2972	phnL	Essential	+	3041994	3042674	680	undisrupted	phosphonate C-P lyase system protein PhnL	VK055_2972_phnL	NA	NA	NA	NA	NA	NA
VK055_2991	VK055_2991	Essential	+	3062922	3063143	221	undisrupted	hypothetical protein	VK055_2991_.	NA	NA	NA	NA	NA	NA
VK055_2998	VK055_2998	Essential	-	3070355	3070480	125	undisrupted	hypothetical protein	VK055_2998_.	NA	NA	NA	NA	NA	NA
VK055_3002	VK055_3002	Essential	-	3073132	3074778	1646	undisrupted	na+/H+ antiporter	VK055_3002_.	NA	NA	NA	NA	Non-essential	Non-essential
VK055_3005	soxR	Essential	-	3077592	3078050	458	undisrupted	redox-sensitive transcriptional activator SoxR	VK055_3005_soxR	NA	NA	NA	NA	NA	NA
VK055_3008	VK055_3008	Essential	-	3080226	3080465	239	undisrupted	hypothetical protein	VK055_3008_.	NA	NA	NA	NA	NA	NA
VK055_3009	VK055_3009	Essential	+	3080605	3080841	236	undisrupted	hypothetical protein	VK055_3009_.	NA	NA	NA	NA	NA	NA
VK055_3013	VK055_3013	Essential	-	3083805	3084836	1031	undisrupted	ABC transporter family protein	VK055_3013_.	NA	NA	Non-essential	Non-essential	Non-essential	NA
VK055_3018	VK055_3018	Essential	+	3090941	3091171	230	undisrupted	putative prepilin peptidase dependent protein C	VK055_3018_.	NA	NA	NA	NA	NA	NA
VK055_3019	VK055_3019	Essential	-	3091203	3091322	119	undisrupted	hypothetical protein	VK055_3019_.	NA	NA	NA	NA	NA	NA
VK055_3021	VK055_3021	Essential	+	3093357	3093707	350	undisrupted	bacterial regulatory helix-turn-helix, AraC family protein	VK055_3021_.	NA	NA	NA	NA	NA	NA
VK055_3023	VK055_3023	Essential	-	3096391	3096558	167	undisrupted	hypothetical protein	VK055_3023_.	NA	NA	NA	NA	NA	NA
VK055_3025	ssb	Essential	-	3098521	3099045	524	undisrupted	ssDNA-binding protein	VK055_3025_ssb	NA	NA	NA	NA	NA	NA
VK055_3028	VK055_3028	Essential	-	3102483	3102899	416	undisrupted	hypothetical protein	VK055_3028_.	NA	NA	NA	NA	NA	NA
VK055_3034	pspG	Essential	-	3109166	3109408	242	undisrupted	phage shock protein G	VK055_3034_pspG	NA	NA	NA	NA	NA	NA
VK055_3040	VK055_3040	Essential	+	3112277	3112420	143	undisrupted	hypothetical protein	VK055_3040_.	NA	NA	NA	NA	NA	NA
VK055_3042	lexA	Essential	-	3113826	3114365	539	undisrupted	repressor LexA	VK055_3042_lexA	NA	NA	NA	NA	NA	NA
VK055_3044	plsB	Essential	+	3115054	3117477	2423	undisrupted	glycerol-3-phosphate O-acyltransferase	VK055_3044_plsB	Essential	Non-essential	Non-essential	Essential	Non-essential	NA
VK055_3045	ubiA	Essential	-	3117526	3118392	866	undisrupted	4-hydroxybenzoate polyprenyl transferase	VK055_3045_ubiA	Non-essential	Non-essential	Non-essential	NA	Non-essential	NA
VK055_3050	VK055_3050	Essential	-	3122666	3122953	287	undisrupted	putative cheW domain protein	VK055_3050_.	NA	NA	NA	NA	NA	NA
VK055_3058	VK055_3058	Essential	+	3130149	3130529	380	undisrupted	hypothetical protein	VK055_3058_.	NA	NA	NA	NA	NA	NA
VK055_3063	VK055_3063	Essential	+	3135562	3136491	929	undisrupted	sodium Bile acid symporter family protein	VK055_3063_.	NA	NA	NA	NA	NA	NA
VK055_3068	VK055_3068	Essential	+	3139933	3140340	407	undisrupted	PTS system, mannose/fructose/sorbose family, IIAcomponent domain protein	VK055_3068_.	Non-essential	NA	Non-essential	NA	NA	NA
VK055_3071	manZ2	Essential	+	3141700	3142536	836	undisrupted	manZ	VK055_3071_manZ2	Non-essential	NA	Non-essential	Non-essential	NA	NA
VK055_3082	VK055_3082	Essential	-	3158264	3158376	112	undisrupted	NA	VK055_3082_.	NA	NA	NA	NA	NA	NA
VK055_3083	VK055_3083	Essential	-	3158478	3161375	2897	undisrupted	NA	VK055_3083_.	NA	NA	NA	NA	NA	NA
VK055_3084	VK055_3084	Essential	-	3161561	3161636	75	undisrupted	NA	VK055_3084_.	NA	NA	NA	NA	NA	NA
VK055_3085	VK055_3085	Essential	-	3161728	3163253	1525	undisrupted	NA	VK055_3085_.	NA	NA	NA	NA	NA	NA
VK055_3095	hemE	Essential	-	3172674	3173738	1064	undisrupted	uroporphyrinogen decarboxylase	VK055_3095_hemE	Non-essential	Non-essential	Non-essential	Non-essential	Non-essential	NA
VK055_3101	thiS	Essential	+	3178668	3178868	200	undisrupted	thiamine biosynthesis protein ThiS	VK055_3101_thiS	Non-essential	Non-essential	Non-essential	NA	Non-essential	NA
VK055_3102	VK055_3102	Essential	+	3178870	3179640	770	undisrupted	thiazole biosynthesis ThiG family protein	VK055_3102_.	Non-essential	Non-essential	Non-essential	NA	Non-essential	NA
VK055_3107	VK055_3107	Essential	+	3183101	3183418	317	undisrupted	PTS system, Lactose/Cellobiose specific IIA subunit	VK055_3107_.	NA	NA	NA	NA	NA	NA
VK055_3109	rpoC	Essential	-	3185202	3189425	4223	undisrupted	DNA-directed RNA polymerase, beta' subunit	VK055_3109_rpoC	NA	NA	NA	NA	NA	NA
VK055_3110	rpoB	Essential	-	3189502	3193530	4028	undisrupted	DNA-directed RNA polymerase, beta subunit	VK055_3110_rpoB	NA	NA	NA	NA	NA	NA
VK055_3111	rplL	Essential	-	3193855	3194220	365	undisrupted	ribosomal protein L7/L12	VK055_3111_rplL	NA	NA	NA	NA	NA	NA
VK055_3112	rplJ	Essential	-	3194287	3194784	497	undisrupted	50S ribosomal subunit protein L10	VK055_3112_rplJ	NA	NA	NA	NA	NA	NA
VK055_3113	rplA	Essential	-	3195198	3195902	704	undisrupted	ribosomal protein L1	VK055_3113_rplA	NA	NA	NA	NA	NA	NA
VK055_3114	rplK	Essential	-	3195906	3196286	380	undisrupted	ribosomal protein L11	VK055_3114_rplK	NA	NA	NA	NA	NA	NA
VK055_3115	nusG	Essential	-	3196491	3197036	545	undisrupted	transcription termination/antitermination factorNusG	VK055_3115_nusG	NA	NA	NA	NA	NA	NA
VK055_3116	secE	Essential	-	3197038	3197421	383	undisrupted	preprotein translocase, SecE subunit	VK055_3116_secE	NA	NA	NA	NA	NA	NA
VK055_3117	tuf	Essential	-	3197758	3198942	1184	undisrupted	translation elongation factor Tu	VK055_3117_tuf	NA	NA	NA	NA	NA	NA
VK055_3118	VK055_3118	Essential	-	3199058	3199133	75	undisrupted	NA	VK055_3118_.	NA	NA	NA	NA	NA	NA
VK055_3119	VK055_3119	Essential	-	3199139	3199213	74	undisrupted	NA	VK055_3119_.	NA	NA	NA	NA	NA	NA
VK055_3120	VK055_3120	Essential	-	3199329	3199413	84	undisrupted	NA	VK055_3120_.	NA	NA	NA	NA	NA	NA
VK055_3121	VK055_3121	Essential	-	3199424	3199499	75	undisrupted	NA	VK055_3121_.	NA	NA	NA	NA	NA	NA
VK055_3122	coaA	Essential	+	3200012	3200878	866	undisrupted	pantothenate kinase	VK055_3122_coaA	Non-essential	Non-essential	Essential	NA	Essential	NA
VK055_3123	VK055_3123	Essential	-	3200904	3201866	962	undisrupted	biotin operon repressor	VK055_3123_.	NA	NA	NA	NA	Non-essential	Non-essential
VK055_3124	murB	Essential	-	3201863	3202891	1028	undisrupted	UDP-N-acetylenolpyruvoylglucosamine reductase	VK055_3124_murB	Essential	Essential	Essential	Essential	Essential	NA
VK055_3125	VK055_3125	Essential	-	3203142	3203254	112	undisrupted	NA	VK055_3125_.	NA	NA	NA	NA	NA	NA
VK055_3126	VK055_3126	Essential	-	3203356	3206253	2897	undisrupted	NA	VK055_3126_.	NA	NA	NA	NA	NA	NA
VK055_3127	VK055_3127	Essential	-	3206426	3206501	75	undisrupted	NA	VK055_3127_.	NA	NA	NA	NA	NA	NA
VK055_3128	VK055_3128	Essential	-	3206538	3206614	76	undisrupted	NA	VK055_3128_.	NA	NA	NA	NA	NA	NA
VK055_3129	VK055_3129	Essential	-	3206692	3208217	1525	undisrupted	NA	VK055_3129_.	NA	NA	NA	NA	NA	NA
VK055_3130	VK055_3130	Essential	-	3208323	3208436	113	undisrupted	hypothetical protein	VK055_3130_.	NA	NA	NA	NA	NA	NA
VK055_3133	VK055_3133	Essential	-	3210648	3211262	614	undisrupted	putative elongation factor	VK055_3133_.	NA	NA	NA	NA	NA	NA
VK055_3138	ubiD	Essential	-	3217005	3218480	1475	undisrupted	3-octaprenyl-4-hydroxybenzoate decarboxylase	VK055_3138_ubiD	Non-essential	Non-essential	Non-essential	NA	NA	NA
VK055_3140	VK055_3140	Essential	-	3219144	3219935	791	undisrupted	magnesium-dependent DNase	VK055_3140_.	NA	NA	NA	NA	NA	NA
VK055_3144	VK055_3144	Essential	-	3221302	3221427	125	undisrupted	tatA	VK055_3144_.	NA	NA	NA	NA	NA	NA
VK055_3145	ubiB	Essential	-	3221683	3223323	1640	undisrupted	2-polyprenylphenol 6-hydroxylase	VK055_3145_ubiB	Non-essential	Non-essential	Non-essential	NA	NA	NA
VK055_3146	VK055_3146	Essential	-	3223320	3223925	605	undisrupted	hypothetical protein	VK055_3146_.	NA	NA	NA	NA	NA	NA
VK055_3147	ubiE	Essential	-	3223939	3224694	755	undisrupted	2-OCTAPRENYL-METHOXY-BENZOQ-METH bifunctional 2-octaprenyl-6-methoxy-1,4-benzoquinone methylase and S-adenosylmethionine:2-DMK methyltransferase	VK055_3147_ubiE	Non-essential	Non-essential	Non-essential	NA	Essential	NA
VK055_3165	xerC	Essential	-	3245565	3246467	902	undisrupted	tyrosine recombinase XerC	VK055_3165_xerC	NA	NA	NA	NA	NA	NA
VK055_3169	cyaY	Essential	+	3248378	3248698	320	undisrupted	iron donor protein CyaY	VK055_3169_cyaY	NA	NA	NA	NA	NA	NA
VK055_3171	hemC	Essential	+	3251742	3252683	941	undisrupted	porphobilinogen deaminase	VK055_3171_hemC	Non-essential	Non-essential	Non-essential	Non-essential	Essential	NA
VK055_3172	VK055_3172	Essential	+	3252680	3253420	740	undisrupted	uroporphyrinogen-III synthase HemD family protein	VK055_3172_.	Non-essential	Non-essential	Non-essential	Non-essential	Essential	NA
VK055_3175	VK055_3175	Essential	-	3256285	3256361	76	undisrupted	NA	VK055_3175_.	NA	NA	NA	NA	NA	NA
VK055_3176	VK055_3176	Essential	-	3256404	3256490	86	undisrupted	NA	VK055_3176_.	NA	NA	NA	NA	NA	NA
VK055_3177	VK055_3177	Essential	-	3256514	3256589	75	undisrupted	NA	VK055_3177_.	NA	NA	NA	NA	NA	NA
VK055_3178	VK055_3178	Essential	-	3256645	3256721	76	undisrupted	NA	VK055_3178_.	NA	NA	NA	NA	NA	NA
VK055_3192	rho	Essential	-	3271437	3272696	1259	undisrupted	transcription termination factor Rho	VK055_3192_rho	NA	NA	NA	NA	NA	NA
VK055_3193	trxA2	Essential	-	3273027	3273356	329	undisrupted	thioredoxin	VK055_3193_trxA2	Non-essential	Non-essential	Non-essential	Non-essential	NA	Essential
VK055_3199	rep	Essential	-	3279455	3281476	2021	undisrupted	ATP-dependent DNA helicase Rep	VK055_3199_rep	NA	NA	NA	NA	NA	NA
VK055_3201	VK055_3201	Essential	+	3281922	3282203	281	undisrupted	PPIC-type PPIASE domain protein	VK055_3201_.	NA	NA	NA	NA	NA	NA
VK055_3209	VK055_3209	Essential	+	3291486	3291617	131	undisrupted	hypothetical protein	VK055_3209_.	NA	NA	NA	NA	NA	NA
VK055_3213	VK055_3213	Essential	-	3294754	3294829	75	undisrupted	NA	VK055_3213_.	NA	NA	NA	NA	NA	NA
VK055_3214	VK055_3214	Essential	-	3294883	3294959	76	undisrupted	NA	VK055_3214_.	NA	NA	NA	NA	NA	NA
VK055_3215	VK055_3215	Essential	-	3295017	3295129	112	undisrupted	NA	VK055_3215_.	NA	NA	NA	NA	NA	NA
VK055_3216	VK055_3216	Essential	-	3295231	3298128	2897	undisrupted	NA	VK055_3216_.	NA	NA	NA	NA	NA	NA
VK055_3217	VK055_3217	Essential	-	3298301	3298376	75	undisrupted	NA	VK055_3217_.	NA	NA	NA	NA	NA	NA
VK055_3218	VK055_3218	Essential	-	3298413	3298489	76	undisrupted	NA	VK055_3218_.	NA	NA	NA	NA	NA	NA
VK055_3219	VK055_3219	Essential	-	3298567	3300092	1525	undisrupted	NA	VK055_3219_.	NA	NA	NA	NA	NA	NA
VK055_3246	priA	Essential	+	3330749	3332944	2195	undisrupted	primosomal protein N'	VK055_3246_priA	NA	NA	NA	NA	NA	NA
VK055_3247	VK055_3247	Essential	-	3332974	3333105	131	undisrupted	hypothetical protein	VK055_3247_.	NA	NA	NA	NA	NA	NA
VK055_3278	VK055_3278	Essential	+	3364535	3364858	323	undisrupted	branched-chain amino acid transport family protein	VK055_3278_.	NA	NA	NA	NA	NA	NA
VK055_3290	dtd	Essential	-	3374677	3375072	395	undisrupted	D-tyrosyl-tRNA(Tyr) deacylase	VK055_3290_dtd	NA	NA	NA	NA	NA	NA
VK055_3294	VK055_3294	Essential	+	3378684	3378845	161	undisrupted	putative cytoplasmic protein	VK055_3294_.	NA	NA	NA	NA	NA	NA
VK055_3300	ysxC	Essential	+	3385876	3386508	632	undisrupted	ribosome biogenesis GTP-binding protein YsxC	VK055_3300_ysxC	NA	NA	NA	NA	NA	NA
VK055_3307	mobB	Essential	+	3393624	3394130	506	undisrupted	molybdopterin-guanine dinucleotide biosynthesis protein B	VK055_3307_mobB	NA	NA	NA	NA	NA	NA
VK055_3308	VK055_3308	Essential	-	3394497	3394609	112	undisrupted	NA	VK055_3308_.	NA	NA	NA	NA	NA	NA
VK055_3309	VK055_3309	Essential	-	3394711	3397608	2897	undisrupted	NA	VK055_3309_.	NA	NA	NA	NA	NA	NA
VK055_3310	VK055_3310	Essential	-	3397794	3397869	75	undisrupted	NA	VK055_3310_.	NA	NA	NA	NA	NA	NA
VK055_3311	VK055_3311	Essential	-	3397961	3399486	1525	undisrupted	NA	VK055_3311_.	NA	NA	NA	NA	NA	NA
VK055_3329	VK055_3329	Essential	+	3419077	3419301	224	undisrupted	ATP synthase I chain family protein	VK055_3329_.	Non-essential	Non-essential	Non-essential	Non-essential	NA	NA
VK055_3330	atpB	Essential	+	3419309	3420124	815	undisrupted	ATP synthase F0, A subunit	VK055_3330_atpB	Non-essential	Non-essential	Non-essential	Non-essential	NA	NA
VK055_3331	atpE	Essential	+	3420174	3420413	239	undisrupted	ATP synthase F0, C subunit	VK055_3331_atpE	Non-essential	Non-essential	Non-essential	Non-essential	NA	NA
VK055_3332	atpF	Essential	+	3420470	3420934	464	undisrupted	ATP synthase F0, B subunit	VK055_3332_atpF	Non-essential	Non-essential	Non-essential	Non-essential	NA	NA
VK055_3333	atpH	Essential	+	3420949	3421482	533	undisrupted	ATP synthase F1, delta subunit	VK055_3333_atpH	Non-essential	Non-essential	Non-essential	Non-essential	Non-essential	NA
VK055_3334	atpA	Essential	+	3421495	3423036	1541	undisrupted	ATP synthase F1, alpha subunit	VK055_3334_atpA	Non-essential	Non-essential	Non-essential	Non-essential	Non-essential	NA
VK055_3335	atpG	Essential	+	3423087	3423950	863	undisrupted	ATP synthase F1, gamma subunit	VK055_3335_atpG	Non-essential	Non-essential	Non-essential	Non-essential	Non-essential	NA
VK055_3336	atpD	Essential	+	3423977	3425359	1382	undisrupted	ATP synthase F1, beta subunit	VK055_3336_atpD	Non-essential	Non-essential	Non-essential	Non-essential	Non-essential	NA
VK055_3337	atpC	Essential	+	3425380	3425799	419	undisrupted	ATP synthase F1, epsilon subunit	VK055_3337_atpC	Non-essential	Non-essential	Non-essential	Non-essential	Non-essential	NA
VK055_3339	VK055_3339	Essential	-	3426214	3426375	161	undisrupted	hypothetical protein	VK055_3339_.	NA	NA	NA	NA	NA	NA
VK055_3340	glmU	Essential	+	3426497	3427867	1370	undisrupted	UDP-N-acetylglucosamine diphosphorylase/glucosamine-1-phosphate N-acetyltransferase	VK055_3340_glmU	Essential	Essential	Non-essential	Non-essential	Essential	NA
VK055_3341	glmS	Essential	+	3428051	3429880	1829	undisrupted	glutamine-fructose-6-phosphate transaminase	VK055_3341_glmS	Essential	Non-essential	Non-essential	Non-essential	Essential	NA
VK055_3343	pstC	Essential	+	3431434	3432345	911	undisrupted	phosphate ABC transporter, permease protein PstC	VK055_3343_pstC	Non-essential	Non-essential	Non-essential	Non-essential	NA	NA
VK055_3345	pstB	Essential	+	3433292	3434056	764	undisrupted	phosphate ABC transporter, ATP-binding protein	VK055_3345_pstB	Non-essential	Non-essential	Non-essential	Non-essential	Non-essential	NA
VK055_3346	phoU	Essential	+	3434107	3434832	725	undisrupted	phosphate transport system regulatory protein PhoU	VK055_3346_phoU	NA	NA	NA	NA	NA	NA
VK055_3358	oxaA	Essential	-	3447015	3448610	1595	undisrupted	inner-membrane protein insertion factor	VK055_3358_oxaA	NA	NA	NA	NA	NA	NA
VK055_3359	dnaA	Essential	+	3450091	3451425	1334	undisrupted	chromosomal replication initiator protein DnaA	VK055_3359_dnaA	NA	NA	NA	NA	NA	Essential
VK055_3360	dnaN	Essential	+	3451430	3452530	1100	undisrupted	DNA polymerase III, beta subunit	VK055_3360_dnaN	NA	NA	NA	NA	NA	NA
VK055_3362	gyrB	Essential	+	3453840	3456254	2414	undisrupted	DNA gyrase, B subunit	VK055_3362_gyrB	NA	NA	NA	NA	NA	NA
VK055_3374	ibpB	Essential	+	3467141	3467569	428	undisrupted	small heat shock protein ibpB	VK055_3374_ibpB	NA	NA	NA	NA	NA	NA
VK055_3375	VK055_3375	Essential	+	3467706	3467975	269	undisrupted	hypothetical protein	VK055_3375_.	NA	NA	NA	NA	NA	NA
VK055_3382	VK055_3382	Essential	+	3474685	3475047	362	undisrupted	hypothetical protein	VK055_3382_.	NA	NA	NA	NA	NA	NA
VK055_3390	VK055_3390	Essential	+	3482901	3483032	131	undisrupted	hypothetical protein	VK055_3390_.	NA	NA	NA	NA	NA	NA
VK055_3394	VK055_3394	Essential	+	3486011	3487513	1502	undisrupted	histidine kinase-, DNA gyrase B-, and HSP90-likeATPase family protein	VK055_3394_.	NA	NA	NA	NA	NA	NA
VK055_3398	VK055_3398	Essential	-	3491109	3491336	227	undisrupted	helix-turn-helix family protein	VK055_3398_.	NA	NA	NA	NA	NA	NA
VK055_3408	VK055_3408	Essential	-	3500129	3501508	1379	undisrupted	lamB porin family protein	VK055_3408_.	NA	NA	NA	NA	NA	NA
VK055_3418	VK055_3418	Essential	+	3510626	3511681	1055	undisrupted	prpF family protein	VK055_3418_.	NA	NA	Non-essential	NA	Non-essential	NA
VK055_3428	VK055_3428	Essential	+	3523472	3523594	122	undisrupted	hypothetical protein	VK055_3428_.	NA	NA	NA	NA	NA	NA
VK055_3435	VK055_3435	Essential	-	3528921	3529457	536	undisrupted	hypothetical protein	VK055_3435_.	NA	NA	NA	NA	NA	NA
VK055_3442	VK055_3442	Essential	+	3533814	3534767	953	undisrupted	bacterial regulatory helix-turn-helix, AraC family protein	VK055_3442_.	NA	NA	NA	NA	NA	NA
VK055_3446	VK055_3446	Essential	-	3538348	3538815	467	undisrupted	hypothetical protein	VK055_3446_.	NA	NA	NA	NA	NA	NA
VK055_3447	VK055_3447	Essential	-	3538986	3539076	90	undisrupted	NA	VK055_3447_.	NA	NA	NA	NA	NA	NA
VK055_3455	VK055_3455	Essential	+	3550557	3550670	113	undisrupted	hypothetical protein	VK055_3455_.	NA	NA	NA	NA	NA	NA
VK055_3459	zapB	Essential	+	3554892	3555137	245	undisrupted	cell division factor ZapB	VK055_3459_zapB	NA	NA	NA	NA	NA	NA
VK055_3464	VK055_3464	Essential	-	3559550	3560116	566	undisrupted	hypothetical protein	VK055_3464_.	NA	NA	NA	NA	NA	NA
VK055_3471	rpoZ	Essential	-	3567570	3567845	275	undisrupted	DNA-directed RNA polymerase, omega subunit	VK055_3471_rpoZ	NA	NA	NA	NA	NA	NA
VK055_3472	gmk	Essential	-	3567900	3568523	623	undisrupted	guanylate kinase	VK055_3472_gmk	Essential	Non-essential	Essential	Essential	Essential	NA
VK055_3479	VK055_3479	Essential	+	3575586	3575699	113	undisrupted	hypothetical protein	VK055_3479_.	NA	NA	NA	NA	NA	NA
VK055_3481	VK055_3481	Essential	-	3577755	3577886	131	undisrupted	hypothetical protein	VK055_3481_.	NA	NA	NA	NA	NA	NA
VK055_3489	dut	Essential	-	3584322	3584777	455	undisrupted	dut	VK055_3489_dut	Non-essential	Non-essential	Non-essential	Non-essential	Essential	NA
VK055_3490	coaBC	Essential	-	3584758	3585975	1217	undisrupted	phosphopantothenoylcysteine decarboxylase / phosphopantothenate--cysteine ligase	VK055_3490_coaBC	Non-essential	Non-essential	Essential	NA	Essential	NA
VK055_3492	rpmB	Essential	+	3587063	3587263	200	undisrupted	ribosomal protein L28	VK055_3492_rpmB	NA	NA	NA	NA	NA	NA
VK055_3495	coaD	Essential	-	3588585	3589064	479	undisrupted	pantetheine-phosphate adenylyltransferase	VK055_3495_coaD	Non-essential	Non-essential	Essential	NA	Essential	NA
VK055_3496	VK055_3496	Essential	-	3589061	3589837	776	undisrupted	glycosyl transferase 2 family protein	VK055_3496_.	NA	NA	NA	NA	Essential	NA
VK055_3497	waaA	Essential	-	3589837	3591111	1274	undisrupted	3-deoxy-D-manno-octulosonic-acid transferase	VK055_3497_waaA	Non-essential	Non-essential	NA	Non-essential	Essential	NA
VK055_3499	VK055_3499	Essential	-	3592222	3593316	1094	undisrupted	glycosyl transferases group 1 family protein	VK055_3499_.	NA	NA	NA	NA	NA	NA
VK055_3500	VK055_3500	Essential	-	3593319	3594446	1127	undisrupted	glycosyl transferases group 1 family protein	VK055_3500_.	NA	NA	NA	NA	NA	NA
VK055_3501	VK055_3501	Essential	-	3594443	3595519	1076	undisrupted	putative lipopolysaccharide heptosyltransferase III	VK055_3501_.	Non-essential	Non-essential	NA	NA	NA	NA
VK055_3502	VK055_3502	Essential	+	3595631	3596593	962	undisrupted	putative lipopolysaccharide biosynthesis proteinWalW	VK055_3502_.	NA	NA	NA	NA	NA	NA
VK055_3504	VK055_3504	Essential	-	3597735	3598817	1082	undisrupted	O-Antigen ligase family protein	VK055_3504_.	NA	NA	NA	NA	NA	NA
VK055_3505	VK055_3505	Essential	-	3598882	3599790	908	undisrupted	putative glycosyltransferase	VK055_3505_.	NA	Non-essential	NA	NA	NA	NA
VK055_3506	rfaC	Essential	-	3599790	3600761	971	undisrupted	lipopolysaccharide heptosyltransferase I	VK055_3506_rfaC	Non-essential	Non-essential	NA	NA	NA	NA
VK055_3507	rfaF	Essential	-	3600765	3601793	1028	undisrupted	lipopolysaccharide heptosyltransferase II	VK055_3507_rfaF	Non-essential	Non-essential	NA	NA	NA	NA
VK055_3508	rfaD	Essential	-	3601833	3602765	932	undisrupted	ADP-glyceromanno-heptose 6-epimerase	VK055_3508_rfaD	Essential	Essential	NA	Essential	Essential	NA
VK055_3516	grxC	Essential	+	3610731	3610982	251	undisrupted	glutaredoxin 3	VK055_3516_grxC	Non-essential	Non-essential	Non-essential	Non-essential	NA	NA
VK055_3517	secB	Essential	+	3611043	3611510	467	undisrupted	protein-export chaperone SecB	VK055_3517_secB	NA	NA	NA	NA	Non-essential	NA
VK055_3518	gpsA	Essential	+	3611537	3612529	992	undisrupted	gpsA	VK055_3518_gpsA	Essential	Non-essential	Non-essential	Essential	Non-essential	NA
VK055_3520	trmL	Essential	-	3613506	3613979	473	undisrupted	tRNA (cytidine(34)-2'-O)-methyltransferase	VK055_3520_trmL	NA	NA	NA	NA	NA	NA
VK055_3524	VK055_3524	Essential	-	3617967	3618329	362	undisrupted	hypothetical protein	VK055_3524_.	NA	NA	NA	NA	NA	NA
VK055_3526	VK055_3526	Essential	+	3618602	3618826	224	undisrupted	hypothetical protein	VK055_3526_.	NA	NA	NA	NA	NA	NA
VK055_3529	yibF	Essential	+	3623535	3624143	608	undisrupted	glutathione transferase-like protein possibly involved in selenium metabolism	VK055_3529_yibF	NA	NA	NA	NA	NA	NA
VK055_3530	selA	Essential	+	3624249	3625637	1388	undisrupted	L-seryl-tRNA selenium transferase	VK055_3530_selA	Non-essential	Non-essential	NA	NA	Non-essential	NA
VK055_3532	VK055_3532	Essential	+	3627720	3628205	485	undisrupted	putative electron transport protein HydN	VK055_3532_.	NA	NA	NA	NA	NA	NA
VK055_3546	glyQ	Essential	+	3644063	3644974	911	undisrupted	glycyl-tRNA synthetase alpha subunit	VK055_3546_glyQ	Non-essential	Non-essential	NA	NA	Non-essential	NA
VK055_3547	glyS	Essential	+	3644984	3647053	2069	undisrupted	glycyl-tRNA synthetase, &beta subunit	VK055_3547_glyS	Non-essential	Non-essential	NA	NA	Non-essential	NA
VK055_3548	VK055_3548	Essential	+	3647379	3647531	152	undisrupted	hok/gef family protein	VK055_3548_.	NA	NA	NA	NA	NA	NA
VK055_3557	VK055_3557	Essential	-	3656486	3657235	749	undisrupted	xylose isomerase-like TIM barrel family protein	VK055_3557_.	NA	NA	NA	NA	NA	NA
VK055_3560	VK055_3560	Essential	-	3661596	3662036	440	undisrupted	acetyltransferase family protein	VK055_3560_.	NA	NA	NA	NA	NA	NA
VK055_3567	VK055_3567	Essential	+	3668451	3668527	76	undisrupted	NA	VK055_3567_.	NA	NA	NA	NA	NA	NA
VK055_3573	VK055_3573	Essential	+	3674940	3675119	179	undisrupted	hypothetical protein	VK055_3573_.	NA	NA	NA	NA	NA	NA
VK055_3574	VK055_3574	Essential	+	3675437	3675976	539	undisrupted	hypothetical protein	VK055_3574_.	NA	NA	NA	NA	NA	NA
VK055_3584	VK055_3584	Essential	+	3690574	3690762	188	undisrupted	hypothetical protein	VK055_3584_.	NA	NA	NA	NA	NA	NA
VK055_3599	VK055_3599	Essential	+	3713483	3714241	758	undisrupted	short chain dehydrogenase family protein	VK055_3599_.	NA	NA	NA	NA	NA	NA
VK055_3602	VK055_3602	Essential	-	3716768	3717961	1193	undisrupted	iron-containing alcohol dehydrogenase family protein	VK055_3602_.	NA	NA	Non-essential	Non-essential	NA	NA
VK055_3616	nikE3	Essential	-	3733200	3733991	791	undisrupted	nickel import ATP-binding protein NikE	VK055_3616_nikE3	Non-essential	Non-essential	Non-essential	Non-essential	NA	NA
VK055_3634	VK055_3634	Essential	+	3751373	3751618	245	undisrupted	sirA-like family protein	VK055_3634_.	NA	NA	NA	NA	NA	NA
VK055_3638	VK055_3638	Essential	-	3755152	3755427	275	undisrupted	hypothetical protein	VK055_3638_.	NA	NA	NA	NA	NA	NA
VK055_3640	ftsY	Essential	+	3756196	3757719	1523	undisrupted	signal recognition particle-docking protein FtsY	VK055_3640_ftsY	NA	NA	NA	NA	NA	NA
VK055_3641	ftsE	Essential	+	3757722	3758390	668	undisrupted	cell division ATP-binding protein FtsE	VK055_3641_ftsE	NA	NA	Non-essential	NA	NA	NA
VK055_3642	VK055_3642	Essential	+	3758383	3759438	1055	undisrupted	putative protein insertion permease FtsX	VK055_3642_.	NA	NA	NA	NA	NA	NA
VK055_3643	rpoH	Essential	+	3759789	3760562	773	undisrupted	alternative sigma factor RpoH	VK055_3643_rpoH	NA	NA	NA	NA	NA	NA
VK055_3649	VK055_3649	Essential	-	3767798	3767941	143	undisrupted	hypothetical protein	VK055_3649_.	NA	NA	NA	NA	NA	NA
VK055_3672	asd2	Essential	+	3788218	3789324	1106	undisrupted	aspartate-semialdehyde dehydrogenase	VK055_3672_asd2	Essential	Non-essential	Non-essential	Non-essential	Non-essential	NA
VK055_3689	bioH	Essential	+	3814602	3815375	773	undisrupted	pimelyl-[acyl-carrier protein] methyl ester esterase	VK055_3689_bioH	NA	NA	NA	NA	NA	NA
VK055_3690	VK055_3690	Essential	+	3815514	3815765	251	undisrupted	hypothetical protein	VK055_3690_.	NA	NA	NA	NA	NA	NA
VK055_3693	VK055_3693	Essential	-	3818450	3818587	137	undisrupted	hypothetical protein	VK055_3693_.	NA	NA	Non-essential	NA	NA	NA
VK055_3702	VK055_3702	Essential	-	3828399	3830528	2129	undisrupted	intracellular growth attenuator IgaA family protein	VK055_3702_.	NA	NA	NA	NA	NA	NA
VK055_3707	VK055_3707	Essential	+	3835498	3835875	377	undisrupted	hypothetical protein	VK055_3707_.	NA	NA	NA	NA	NA	NA
VK055_3717	nirD2	Essential	-	3845690	3846016	326	undisrupted	nitrite reductase [NAD(P)H] small subunit	VK055_3717_nirD2	Non-essential	Non-essential	Non-essential	NA	NA	NA
VK055_3719	VK055_3719	Essential	+	3848549	3848719	170	undisrupted	hypothetical protein	VK055_3719_.	NA	NA	NA	NA	Non-essential	NA
VK055_3726	VK055_3726	Essential	+	3852261	3852428	167	undisrupted	hypothetical protein	VK055_3726_.	NA	NA	NA	NA	NA	NA
VK055_3741	VK055_3741	Essential	-	3866177	3866395	218	undisrupted	slyX family protein	VK055_3741_.	NA	NA	NA	NA	NA	NA
VK055_3743	VK055_3743	Essential	+	3867617	3868339	722	undisrupted	sensory box protein	VK055_3743_.	NA	NA	NA	NA	NA	NA
VK055_3744	VK055_3744	Essential	+	3868339	3868725	386	undisrupted	dsrE/DsrF-like family protein	VK055_3744_.	NA	NA	NA	NA	NA	NA
VK055_3745	tusC	Essential	+	3868725	3869084	359	undisrupted	sulfur relay protein TusC/DsrF	VK055_3745_tusC	NA	NA	NA	NA	NA	NA
VK055_3746	dsrH	Essential	+	3869152	3869379	227	undisrupted	sulfur relay protein TusB/DsrH	VK055_3746_dsrH	NA	NA	NA	NA	NA	NA
VK055_3747	rpsL	Essential	+	3869504	3869878	374	undisrupted	ribosomal protein S12	VK055_3747_rpsL	NA	NA	NA	NA	NA	NA
VK055_3748	rpsG	Essential	+	3869975	3870445	470	undisrupted	ribosomal protein S7	VK055_3748_rpsG	NA	NA	NA	NA	NA	NA
VK055_3749	fusA	Essential	+	3870542	3872656	2114	undisrupted	translation elongation factor G	VK055_3749_fusA	NA	NA	Non-essential	Non-essential	NA	NA
VK055_3750	tuf2	Essential	+	3872726	3873910	1184	undisrupted	translation elongation factor Tu	VK055_3750_tuf2	NA	NA	Non-essential	Non-essential	NA	NA
VK055_3754	rpsJ	Essential	+	3875688	3875999	311	undisrupted	ribosomal protein S10	VK055_3754_rpsJ	NA	NA	NA	NA	NA	NA
VK055_3755	rplC	Essential	+	3876032	3876661	629	undisrupted	50S ribosomal protein L3	VK055_3755_rplC	NA	NA	NA	NA	NA	NA
VK055_3756	rplD	Essential	+	3876672	3877277	605	undisrupted	50S ribosomal protein L4	VK055_3756_rplD	NA	NA	NA	NA	NA	NA
VK055_3757	rplW	Essential	+	3877274	3877576	302	undisrupted	50S ribosomal subunit protein L23	VK055_3757_rplW	NA	NA	NA	NA	NA	NA
VK055_3758	rplB	Essential	+	3877648	3878415	767	undisrupted	ribosomal protein L2	VK055_3758_rplB	NA	NA	NA	NA	NA	NA
VK055_3759	rpsS	Essential	+	3878561	3878710	149	undisrupted	30S ribosomal subunit protein S19	VK055_3759_rpsS	NA	NA	NA	NA	NA	NA
VK055_3760	rplV	Essential	+	3878725	3879057	332	undisrupted	ribosomal protein L22	VK055_3760_rplV	NA	NA	NA	NA	NA	NA
VK055_3761	rpsC	Essential	+	3879075	3879773	698	undisrupted	ribosomal protein S3	VK055_3761_rpsC	NA	NA	NA	NA	NA	NA
VK055_3762	rplP	Essential	+	3879786	3880196	410	undisrupted	ribosomal protein L16	VK055_3762_rplP	NA	NA	NA	NA	NA	NA
VK055_3763	VK055_3763	Essential	-	3880369	3880893	524	undisrupted	hypothetical protein	VK055_3763_.	NA	NA	NA	NA	NA	NA
VK055_3764	rpmC	Essential	+	3880196	3880387	191	undisrupted	ribosomal protein L29	VK055_3764_rpmC	NA	NA	NA	NA	NA	NA
VK055_3765	rplN	Essential	+	3880864	3881178	314	undisrupted	ribosomal protein L14	VK055_3765_rplN	NA	NA	NA	NA	NA	NA
VK055_3766	rplX	Essential	+	3881189	3881503	314	undisrupted	ribosomal protein L24	VK055_3766_rplX	NA	NA	NA	NA	NA	NA
VK055_3767	VK055_3767	Essential	+	3881518	3882057	539	undisrupted	ribosomal L5 family protein	VK055_3767_.	NA	NA	NA	NA	NA	NA
VK055_3768	rpsN	Essential	+	3882087	3882377	290	undisrupted	30S ribosomal subunit protein S14	VK055_3768_rpsN	NA	NA	NA	NA	NA	NA
VK055_3769	rpsH	Essential	+	3882411	3882803	392	undisrupted	30S ribosomal subunit protein S8	VK055_3769_rpsH	NA	NA	NA	NA	NA	NA
VK055_3770	rplF	Essential	+	3882816	3883349	533	undisrupted	ribosomal protein L6	VK055_3770_rplF	NA	NA	NA	NA	NA	NA
VK055_3771	rplR	Essential	+	3883359	3883712	353	undisrupted	ribosomal protein L18	VK055_3771_rplR	NA	NA	NA	NA	NA	NA
VK055_3772	rpsE	Essential	+	3883727	3884230	503	undisrupted	ribosomal protein S5	VK055_3772_rpsE	NA	NA	NA	NA	NA	NA
VK055_3773	rpmD	Essential	+	3884234	3884413	179	undisrupted	ribosomal protein L30	VK055_3773_rpmD	NA	NA	NA	NA	NA	NA
VK055_3774	rplO	Essential	+	3884417	3884851	434	undisrupted	ribosomal protein L15	VK055_3774_rplO	NA	NA	NA	NA	NA	NA
VK055_3775	secY	Essential	+	3884859	3886190	1331	undisrupted	preprotein translocase, SecY subunit	VK055_3775_secY	NA	NA	NA	NA	NA	NA
VK055_3776	rpsM	Essential	+	3886487	3886843	356	undisrupted	30S ribosomal protein S13	VK055_3776_rpsM	NA	NA	NA	NA	NA	NA
VK055_3777	rpsD	Essential	+	3887283	3887903	620	undisrupted	ribosomal protein S4	VK055_3777_rpsD	NA	NA	NA	NA	NA	NA
VK055_3778	rpoA	Essential	+	3887929	3888918	989	undisrupted	DNA-directed RNA polymerase, alpha subunit	VK055_3778_rpoA	NA	NA	NA	NA	NA	NA
VK055_3779	rplQ	Essential	+	3888959	3889345	386	undisrupted	ribosomal protein L17	VK055_3779_rplQ	NA	NA	NA	NA	NA	NA
VK055_3780	VK055_3780	Essential	+	3889454	3889822	368	undisrupted	hypothetical protein	VK055_3780_.	NA	NA	NA	NA	NA	NA
VK055_3785	fmt	Essential	-	3893814	3894761	947	undisrupted	methionyl-tRNA formyltransferase	VK055_3785_fmt	Non-essential	Non-essential	NA	NA	NA	NA
VK055_3786	def	Essential	-	3894776	3895270	494	undisrupted	peptide deformylase	VK055_3786_def	NA	NA	NA	NA	NA	NA
VK055_3789	VK055_3789	Essential	+	3897010	3897552	542	undisrupted	ogr/Delta-like zinc finger family protein	VK055_3789_.	NA	NA	NA	NA	NA	NA
VK055_3790	VK055_3790	Essential	+	3897557	3898129	572	undisrupted	protein involved in synthesis of threonylcarbamoyladenosine-modified tRNA	VK055_3790_.	NA	NA	NA	NA	NA	NA
VK055_3793	VK055_3793	Essential	+	3898948	3899205	257	undisrupted	hypothetical protein	VK055_3793_.	NA	NA	NA	NA	NA	NA
VK055_3795	VK055_3795	Essential	+	3900213	3901740	1527	undisrupted	NA	VK055_3795_.	NA	NA	NA	NA	NA	NA
VK055_3796	VK055_3796	Essential	+	3901946	3904845	2899	undisrupted	NA	VK055_3796_.	NA	NA	NA	NA	NA	NA
VK055_3797	VK055_3797	Essential	+	3904945	3905059	114	undisrupted	NA	VK055_3797_.	NA	NA	NA	NA	NA	NA
VK055_3798	VK055_3798	Essential	+	3905073	3905148	75	undisrupted	NA	VK055_3798_.	NA	NA	NA	NA	NA	NA
VK055_3799	VK055_3799	Essential	+	3905189	3905303	114	undisrupted	NA	VK055_3799_.	NA	NA	NA	NA	NA	NA
VK055_3800	VK055_3800	Essential	+	3905518	3905640	122	undisrupted	hypothetical protein	VK055_3800_.	NA	NA	NA	NA	NA	NA
VK055_3805	fis	Essential	-	3911604	3911900	296	undisrupted	fis transcriptional dual regulator	VK055_3805_fis	NA	NA	NA	NA	NA	NA
VK055_3806	yhdG	Essential	-	3911925	3912797	872	undisrupted	tRNA dihydrouridine synthase	VK055_3806_yhdG	NA	NA	NA	NA	NA	NA
VK055_3807	VK055_3807	Essential	-	3913048	3913197	149	undisrupted	hypothetical protein	VK055_3807_.	NA	NA	NA	NA	NA	NA
VK055_3810	VK055_3810	Essential	-	3915582	3915824	242	undisrupted	hypothetical protein	VK055_3810_.	NA	NA	NA	NA	Non-essential	NA
VK055_3811	accC	Essential	-	3915935	3917284	1349	undisrupted	acetyl-CoA carboxylase, biotin carboxylase subunit	VK055_3811_accC	Essential	Non-essential	Non-essential	Essential	Non-essential	NA
VK055_3812	accB	Essential	-	3917295	3917762	467	undisrupted	acetyl-CoA carboxylase, biotin carboxyl carrier protein	VK055_3812_accB	Essential	Non-essential	Non-essential	Non-essential	NA	NA
VK055_3813	aroQ	Essential	-	3917785	3918189	404	undisrupted	3-dehydroquinate dehydratase, type II	VK055_3813_aroQ	NA	NA	Non-essential	Non-essential	Non-essential	NA
VK055_3818	mreB	Essential	+	3922816	3923859	1043	undisrupted	mreB	VK055_3818_mreB	NA	NA	NA	NA	NA	NA
VK055_3819	mreC	Essential	+	3923930	3924922	992	undisrupted	rod shape-determining protein MreC	VK055_3819_mreC	NA	NA	NA	NA	NA	NA
VK055_3820	mreD	Essential	+	3924922	3925410	488	undisrupted	rod shape-determining protein MreD	VK055_3820_mreD	NA	NA	NA	NA	NA	NA
VK055_3832	argR	Essential	-	3938463	3938933	470	undisrupted	arginine repressor	VK055_3832_argR	NA	NA	NA	NA	NA	NA
VK055_3839	oadG2	Essential	+	3944869	3945120	251	undisrupted	oxaloacetate decarboxylase gamma chain	VK055_3839_oadG2	NA	Non-essential	NA	NA	Non-essential	NA
VK055_3840	oadA2	Essential	+	3945136	3946899	1763	undisrupted	oxaloacetate decarboxylase alpha subunit	VK055_3840_oadA2	NA	Non-essential	NA	NA	Non-essential	NA
VK055_3842	VK055_3842	Essential	+	3948276	3948986	710	undisrupted	ATP:dephospho-CoA triphosphoribosyl transferase family protein	VK055_3842_.	NA	NA	NA	NA	NA	NA
VK055_3847	rplM	Essential	+	3953681	3954109	428	undisrupted	ribosomal protein L13	VK055_3847_rplM	NA	NA	NA	NA	NA	NA
VK055_3848	rpsI	Essential	+	3954125	3954517	392	undisrupted	30S ribosomal subunit protein S9	VK055_3848_rpsI	NA	NA	NA	NA	NA	NA
VK055_3861	VK055_3861	Essential	-	3972300	3972572	272	undisrupted	phosphocarrier, HPr family protein	VK055_3861_.	NA	NA	Non-essential	NA	NA	NA
VK055_3866	lptB	Essential	-	3975819	3976544	725	undisrupted	lipopolysaccharide export system ATP-binding protein lptB	VK055_3866_lptB	NA	NA	NA	NA	NA	NA
VK055_3867	lptA	Essential	-	3976551	3977096	545	undisrupted	lipopolysaccharide transport periplasmic proteinLptA	VK055_3867_lptA	NA	NA	NA	NA	NA	NA
VK055_3868	yrbK	Essential	-	3977065	3977640	575	undisrupted	lptC	VK055_3868_yrbK	NA	NA	NA	NA	Essential	NA
VK055_3869	yrbI	Essential	-	3977637	3978203	566	undisrupted	3-deoxy-D-manno-octulosonate 8-phosphate phosphatase	VK055_3869_yrbI	Essential	Essential	NA	Essential	Essential	NA
VK055_3876	yrbB	Essential	+	3983218	3983508	290	undisrupted	mlaB	VK055_3876_yrbB	NA	NA	NA	NA	NA	NA
VK055_3877	VK055_3877	Essential	+	3983645	3983899	254	undisrupted	bolA-like family protein	VK055_3877_.	NA	NA	NA	NA	NA	NA
VK055_3878	murA	Essential	+	3983953	3985212	1259	undisrupted	UDP-N-acetylglucosamine 1-carboxyvinyltransferase	VK055_3878_murA	Essential	Essential	Essential	Essential	Essential	NA
VK055_3880	ispB	Essential	-	3985740	3986711	971	undisrupted	octaprenyl-diphosphate synthase	VK055_3880_ispB	Non-essential	Non-essential	Essential	NA	Essential	NA
VK055_3881	VK055_3881	Essential	-	3986921	3987238	317	undisrupted	hypothetical protein	VK055_3881_.	NA	Non-essential	NA	NA	NA	NA
VK055_3882	rpmA	Essential	+	3987304	3987561	257	undisrupted	ribosomal protein L27	VK055_3882_rpmA	NA	NA	NA	NA	NA	NA
VK055_3883	VK055_3883	Essential	+	3987655	3988620	965	undisrupted	eamA-like transporter family protein	VK055_3883_.	NA	NA	NA	NA	Non-essential	NA
VK055_3884	cgtA	Essential	+	3988636	3989814	1178	undisrupted	obg family GTPase CgtA	VK055_3884_cgtA	NA	NA	NA	NA	NA	NA
VK055_3886	greA	Essential	+	3991550	3992011	461	undisrupted	transcription elongation factor GreA	VK055_3886_greA	NA	NA	NA	NA	NA	NA
VK055_3888	rrmJ	Essential	+	3992581	3993210	629	undisrupted	ribosomal RNA large subunit methyltransferase J	VK055_3888_rrmJ	NA	NA	NA	NA	NA	NA
VK055_3889	hflB	Essential	+	3993310	3995244	1934	undisrupted	ftsH HflB	VK055_3889_hflB	NA	NA	NA	NA	Non-essential	NA
VK055_3890	folP	Essential	+	3995389	3996186	797	undisrupted	dihydropteroate synthase	VK055_3890_folP	Non-essential	Non-essential	Essential	NA	Essential	NA
VK055_3891	glmM	Essential	+	3996179	3997516	1337	undisrupted	phosphoglucosamine mutase	VK055_3891_glmM	Essential	Essential	Essential	Essential	Essential	NA
VK055_3892	secG	Essential	+	3997806	3998075	269	undisrupted	preprotein translocase, SecG subunit	VK055_3892_secG	NA	NA	NA	NA	NA	NA
VK055_3893	VK055_3893	Essential	+	3998085	3998171	86	undisrupted	NA	VK055_3893_.	NA	NA	NA	NA	NA	NA
VK055_3896	VK055_3896	Essential	-	3999234	3999359	125	undisrupted	hypothetical protein	VK055_3896_.	NA	NA	NA	NA	NA	NA
VK055_3899	VK055_3899	Essential	+	4002102	4002178	76	undisrupted	NA	VK055_3899_.	NA	NA	NA	NA	NA	NA
VK055_3900	rimP	Essential	+	4002417	4002839	422	undisrupted	ribosome maturation protein	VK055_3900_rimP	NA	NA	NA	NA	NA	NA
VK055_3901	nusA	Essential	+	4002867	4004354	1487	undisrupted	transcription termination/antitermination L factor	VK055_3901_nusA	NA	NA	NA	NA	NA	NA
VK055_3902	infB	Essential	+	4004379	4007069	2690	undisrupted	translation initiation factor IF-2	VK055_3902_infB	NA	NA	NA	NA	NA	NA
VK055_3903	rbfA	Essential	+	4007172	4007573	401	undisrupted	ribosome-binding factor A	VK055_3903_rbfA	NA	NA	NA	NA	NA	NA
VK055_3905	rpsO	Essential	+	4008666	4008935	269	undisrupted	ribosomal protein S15	VK055_3905_rpsO	NA	NA	NA	NA	NA	NA
VK055_3916	VK055_3916	Essential	+	4019631	4020122	491	undisrupted	acetyltransferase family protein	VK055_3916_.	NA	NA	NA	NA	NA	NA
VK055_3917	yfkM	Essential	-	4020854	4021390	536	undisrupted	general stress protein 18	VK055_3917_yfkM	NA	NA	Non-essential	Non-essential	NA	NA
VK055_3923	VK055_3923	Essential	-	4024605	4024991	386	undisrupted	hypothetical protein	VK055_3923_.	NA	NA	NA	NA	NA	NA
VK055_3932	VK055_3932	Essential	-	4035775	4035927	152	undisrupted	hypothetical protein	VK055_3932_.	NA	NA	NA	NA	NA	NA
VK055_3934	VK055_3934	Essential	-	4036546	4036713	167	undisrupted	hypothetical protein	VK055_3934_.	NA	NA	NA	NA	NA	NA
VK055_3940	VK055_3940	Essential	-	4040781	4041077	296	undisrupted	yqjK-like family protein	VK055_3940_.	NA	NA	NA	NA	NA	NA
VK055_3943	VK055_3943	Essential	-	4041826	4042194	368	undisrupted	hypothetical protein	VK055_3943_.	NA	NA	NA	NA	NA	NA
VK055_3950	ygjV	Essential	+	4049467	4050021	554	undisrupted	inner membrane protein	VK055_3950_ygjV	NA	NA	NA	NA	NA	NA
VK055_3962	VK055_3962	Essential	+	4063570	4064604	1034	undisrupted	branched-chain amino acid transport system / permease component family protein	VK055_3962_.	NA	NA	Non-essential	NA	NA	NA
VK055_3972	dhaL	Essential	-	4074362	4074994	632	undisrupted	dihydroxyacetone kinase, L subunit	VK055_3972_dhaL	Non-essential	Non-essential	Non-essential	Non-essential	Non-essential	NA
VK055_3974	VK055_3974	Essential	-	4076231	4076416	185	undisrupted	hypothetical protein	VK055_3974_.	NA	NA	NA	NA	NA	NA
VK055_3980	VK055_3980	Essential	-	4081878	4082306	428	undisrupted	hypothetical protein	VK055_3980_.	NA	NA	NA	NA	NA	NA
VK055_3986	VK055_3986	Essential	-	4088157	4088408	251	undisrupted	hdeA/HdeB family protein	VK055_3986_.	NA	NA	NA	NA	NA	NA
VK055_3987	VK055_3987	Essential	-	4088489	4089064	575	undisrupted	hypothetical protein	VK055_3987_.	NA	NA	NA	NA	NA	NA
VK055_3988	VK055_3988	Essential	+	4089305	4089976	671	undisrupted	hypothetical protein	VK055_3988_.	NA	NA	NA	NA	NA	NA
VK055_3992	VK055_3992	Essential	-	4094664	4094954	290	undisrupted	putative lipoprotein	VK055_3992_.	NA	NA	NA	NA	NA	NA
VK055_3993	VK055_3993	Essential	-	4095476	4095551	75	undisrupted	NA	VK055_3993_.	NA	NA	NA	NA	NA	NA
VK055_3994	VK055_3994	Essential	+	4095676	4096182	506	undisrupted	uracil DNA glycosylase superfamily protein	VK055_3994_.	NA	NA	NA	NA	NA	NA
VK055_3995	VK055_3995	Essential	-	4096282	4098123	1841	undisrupted	sigma70 factor RNA polymerase, sigma 70 (sigma D) factor	VK055_3995_.	NA	NA	NA	NA	NA	NA
VK055_3996	dnaG	Essential	-	4098342	4100087	1745	undisrupted	DNA primase	VK055_3996_dnaG	NA	NA	NA	NA	NA	NA
VK055_3997	rpsU	Essential	-	4100199	4100414	215	undisrupted	ribosomal protein S21	VK055_3997_rpsU	NA	NA	NA	NA	NA	NA
VK055_3998	VK055_3998	Essential	+	4100652	4101665	1013	undisrupted	putative peptidase	VK055_3998_.	NA	NA	NA	NA	NA	NA
VK055_4005	ureA	Essential	-	4107285	4107587	302	undisrupted	urease subunit gamma	VK055_4005_ureA	Non-essential	Non-essential	Non-essential	Non-essential	Non-essential	NA
VK055_4007	VK055_4007	Essential	+	4108393	4108557	164	undisrupted	short-chain dehydrogenase/reductase family oxidoreductase	VK055_4007_.	NA	NA	NA	NA	NA	NA
VK055_4008	VK055_4008	Essential	-	4108568	4108687	119	undisrupted	hypothetical protein	VK055_4008_.	NA	NA	NA	NA	NA	NA
VK055_4012	cca	Essential	-	4110959	4112200	1241	undisrupted	tRNA nucleotidyltransferase	VK055_4012_cca	NA	NA	NA	NA	NA	NA
VK055_4014	VK055_4014	Essential	-	4112882	4113001	119	undisrupted	hypothetical protein	VK055_4014_.	NA	NA	NA	NA	NA	NA
VK055_4015	VK055_4015	Essential	+	4113097	4114395	1298	undisrupted	CYTH domain protein	VK055_4015_.	NA	NA	Non-essential	Non-essential	NA	NA
VK055_4017	rfaE	Essential	+	4117312	4118745	1433	undisrupted	bifunctional protein RfaE, domain I	VK055_4017_rfaE	NA	NA	NA	Non-essential	Essential	NA
VK055_4018	VK055_4018	Essential	+	4118964	4119161	197	undisrupted	glycogen synthesis family protein	VK055_4018_.	NA	NA	NA	NA	NA	NA
VK055_4019	VK055_4019	Essential	-	4119197	4119469	272	undisrupted	membrane fusogenic activity family protein	VK055_4019_.	NA	NA	NA	NA	NA	NA
VK055_4025	tolC	Essential	-	4124360	4125832	1472	undisrupted	tolC outer membrane channel	VK055_4025_tolC	NA	NA	Non-essential	Non-essential	NA	NA
VK055_4031	ygiN	Essential	-	4130506	4130820	314	undisrupted	quinol monooxygenase monomer	VK055_4031_ygiN	Non-essential	Non-essential	Non-essential	Non-essential	NA	NA
VK055_4037	parC	Essential	+	4135210	4137468	2258	undisrupted	DNA topoisomerase IV, A subunit	VK055_4037_parC	NA	NA	NA	NA	NA	NA
VK055_4038	VK055_4038	Essential	+	4137708	4138397	689	undisrupted	1-acylglycerol-3-phosphate O-acyltransferases domain protein	VK055_4038_.	Essential	Non-essential	Non-essential	Essential	Essential	NA
VK055_4047	VK055_4047	Essential	+	4148124	4148339	215	undisrupted	hypothetical protein	VK055_4047_.	NA	NA	NA	NA	NA	NA
VK055_4049	exbD	Essential	+	4149070	4149495	425	undisrupted	tonB system transport protein ExbD	VK055_4049_exbD	Non-essential	Non-essential	Non-essential	NA	NA	NA
VK055_4060	VK055_4060	Essential	-	4159531	4159686	155	undisrupted	hypothetical protein	VK055_4060_.	NA	NA	NA	NA	NA	NA
VK055_4061	VK055_4061	Essential	-	4159771	4160019	248	undisrupted	hypothetical protein	VK055_4061_.	NA	NA	NA	NA	NA	NA
VK055_4063	VK055_4063	Essential	-	4160590	4161192	602	undisrupted	hypothetical protein	VK055_4063_.	NA	NA	NA	NA	Non-essential	NA
VK055_4069	VK055_4069	Essential	-	4167907	4168020	113	undisrupted	hypothetical protein	VK055_4069_.	NA	NA	NA	NA	NA	NA
VK055_4070	VK055_4070	Essential	+	4168478	4168873	395	undisrupted	fimbrial family protein	VK055_4070_.	NA	NA	NA	NA	NA	NA
VK055_4071	VK055_4071	Essential	+	4169349	4169660	311	undisrupted	gram-negative pili assembly chaperone, C-terminal domain protein	VK055_4071_.	NA	NA	NA	NA	NA	NA
VK055_4072	VK055_4072	Essential	+	4169669	4170433	764	undisrupted	gram-negative pili assembly chaperone, C-terminal domain protein	VK055_4072_.	NA	NA	NA	NA	NA	NA
VK055_4076	VK055_4076	Essential	-	4177247	4177322	75	undisrupted	NA	VK055_4076_.	NA	NA	NA	NA	NA	NA
VK055_4081	yggX	Essential	-	4183320	4183595	275	undisrupted	that protects iron-sulfur proteins against oxidative damage	VK055_4081_yggX	NA	NA	NA	NA	NA	NA
VK055_4085	VK055_4085	Essential	+	4185915	4186634	719	undisrupted	hypothetical protein	VK055_4085_.	NA	NA	NA	NA	NA	NA
VK055_4087	VK055_4087	Essential	-	4187933	4188742	809	undisrupted	ABC transporter family protein	VK055_4087_.	NA	NA	NA	NA	NA	NA
VK055_4090	rdgB	Essential	-	4191255	4191848	593	undisrupted	non-canonical purine NTP pyrophosphatase, RdgB/HAM1 family	VK055_4090_rdgB	Non-essential	Non-essential	Non-essential	NA	NA	NA
VK055_4095	VK055_4095	Essential	-	4194484	4194627	143	undisrupted	hypothetical protein	VK055_4095_.	NA	NA	NA	NA	NA	NA
VK055_4097	VK055_4097	Essential	-	4195488	4195904	416	undisrupted	hypothetical protein	VK055_4097_.	NA	NA	NA	NA	NA	NA
VK055_4098	VK055_4098	Essential	-	4195904	4196467	563	undisrupted	hypothetical protein	VK055_4098_.	NA	NA	NA	NA	NA	NA
VK055_4104	metK	Essential	-	4201595	4202749	1154	undisrupted	methionine adenosyltransferase	VK055_4104_metK	Non-essential	Non-essential	Essential	Non-essential	Essential	NA
VK055_4114	VK055_4114	Essential	+	4211798	4212724	926	undisrupted	glyoxalase/Bleomycin resistance /Dioxygenase superfamily protein	VK055_4114_.	NA	NA	NA	NA	NA	NA
VK055_4125	tkt3	Essential	+	4224032	4226023	1991	undisrupted	transketolase	VK055_4125_tkt3	Non-essential	Non-essential	Non-essential	Non-essential	Non-essential	NA
VK055_4127	VK055_4127	Essential	+	4227491	4228639	1148	undisrupted	phosphoglycerate kinase family protein	VK055_4127_.	Non-essential	Non-essential	Non-essential	Non-essential	Non-essential	NA
VK055_4128	fbaA	Essential	+	4228737	4229816	1079	undisrupted	fructose-bisphosphate aldolase, class II	VK055_4128_fbaA	Non-essential	Non-essential	Non-essential	Non-essential	NA	NA
VK055_4132	iciA	Essential	-	4232561	4233454	893	undisrupted	argP transcriptional activator	VK055_4132_iciA	NA	NA	NA	NA	NA	NA
VK055_4133	rpiA	Essential	+	4233622	4234281	659	undisrupted	ribose 5-phosphate isomerase A	VK055_4133_rpiA	Non-essential	Non-essential	Non-essential	Non-essential	Non-essential	NA
VK055_4134	VK055_4134	Essential	-	4234382	4234519	137	undisrupted	hypothetical protein	VK055_4134_.	NA	NA	NA	NA	NA	NA
VK055_4137	VK055_4137	Essential	-	4236787	4236942	155	undisrupted	protein that localizes to the cytokinetic ring	VK055_4137_.	NA	NA	NA	NA	NA	NA
VK055_4139	pepP	Essential	+	4237885	4239201	1316	undisrupted	pepP	VK055_4139_pepP	NA	NA	Non-essential	Non-essential	NA	NA
VK055_4140	ubiH	Essential	+	4239198	4240376	1178	undisrupted	2-polyprenyl-6-methoxyphenol 4-hydroxylase	VK055_4140_ubiH	Non-essential	Non-essential	NA	NA	NA	NA
VK055_4142	gcvT	Essential	+	4242012	4243106	1094	undisrupted	glycine cleavage system T protein	VK055_4142_gcvT	Non-essential	Non-essential	Non-essential	Non-essential	Non-essential	NA
VK055_4146	VK055_4146	Essential	+	4247487	4248008	521	undisrupted	transposase family protein	VK055_4146_.	NA	NA	NA	NA	NA	NA
VK055_4147	VK055_4147	Essential	+	4248065	4248850	785	undisrupted	putative transposase	VK055_4147_.	NA	NA	NA	NA	NA	NA
VK055_4148	VK055_4148	Essential	-	4248976	4249479	503	undisrupted	ahpC/TSA family protein	VK055_4148_.	NA	NA	NA	NA	NA	NA
VK055_4151	VK055_4151	Essential	-	4252141	4252422	281	undisrupted	putative copper-sensitivity suppressor protein A	VK055_4151_.	NA	NA	NA	NA	NA	NA
VK055_4156	VK055_4156	Essential	-	4256240	4257223	983	undisrupted	putative folate-dependent regulatory protein	VK055_4156_.	NA	NA	NA	NA	NA	NA
VK055_4158	VK055_4158	Essential	+	4257716	4258126	410	undisrupted	hypothetical protein	VK055_4158_.	NA	NA	NA	NA	NA	NA
VK055_4160	xerD	Essential	+	4258755	4259651	896	undisrupted	tyrosine recombinase XerD	VK055_4160_xerD	NA	NA	NA	NA	NA	NA
VK055_4163	prfB	Essential	+	4262429	4263310	881	undisrupted	peptide chain release factor 2	VK055_4163_prfB	NA	NA	NA	NA	NA	NA
VK055_4164	lysS2	Essential	+	4263320	4264837	1517	undisrupted	lysine--tRNA ligase	VK055_4164_lysS2	Non-essential	Non-essential	Non-essential	NA	Non-essential	NA
VK055_4178	VK055_4178	Essential	-	4282390	4283013	623	undisrupted	bacterial regulatory, luxR family protein	VK055_4178_.	NA	NA	NA	NA	NA	NA
VK055_4179	VK055_4179	Essential	+	4283449	4283568	119	undisrupted	hypothetical protein	VK055_4179_.	NA	NA	NA	NA	NA	NA
VK055_4181	VK055_4181	Essential	+	4284424	4284591	167	undisrupted	papC C-terminal domain protein	VK055_4181_.	NA	NA	NA	NA	NA	NA
VK055_4185	VK055_4185	Essential	-	4287420	4288031	611	undisrupted	ABC transporter family protein	VK055_4185_.	NA	NA	Non-essential	Non-essential	NA	NA
VK055_4186	VK055_4186	Essential	-	4288220	4289032	812	undisrupted	binding-protein-dependent transport system innermembrane component family protein	VK055_4186_.	NA	NA	Non-essential	Non-essential	NA	NA
VK055_4187	VK055_4187	Essential	-	4289032	4289985	953	undisrupted	binding-protein-dependent transport system innermembrane component family protein	VK055_4187_.	NA	NA	Non-essential	Non-essential	NA	NA
VK055_4191	ureG2	Essential	-	4293784	4294407	623	undisrupted	urease accessory protein UreG	VK055_4191_ureG2	NA	Non-essential	Non-essential	Non-essential	NA	Non-essential
VK055_4195	ureB2	Essential	-	4297545	4297985	440	undisrupted	urease subunit beta	VK055_4195_ureB2	NA	Non-essential	Non-essential	Non-essential	NA	NA
VK055_4197	VK055_4197	Essential	-	4299093	4299251	158	undisrupted	hypothetical protein	VK055_4197_.	NA	NA	NA	NA	NA	NA
VK055_4198	hdeB	Essential	-	4299690	4300031	341	undisrupted	acid stress chaperone	VK055_4198_hdeB	NA	NA	NA	NA	NA	NA
VK055_4199	VK055_4199	Essential	-	4300050	4300658	608	undisrupted	hypothetical protein	VK055_4199_.	NA	NA	NA	NA	NA	NA
VK055_4206	VK055_4206	Essential	-	4308811	4309014	203	undisrupted	putative membrane domain protein	VK055_4206_.	NA	NA	NA	NA	NA	NA
VK055_4223	VK055_4223	Essential	-	4326422	4326694	272	undisrupted	hypothetical protein	VK055_4223_.	NA	NA	NA	NA	NA	NA
VK055_4225	VK055_4225	Essential	+	4327142	4327414	272	undisrupted	hypothetical protein	VK055_4225_.	NA	NA	NA	NA	NA	NA
VK055_4228	VK055_4228	Essential	-	4329789	4330274	485	undisrupted	fimbrial family protein	VK055_4228_.	NA	NA	NA	NA	NA	NA
VK055_4232	VK055_4232	Essential	-	4334288	4334824	536	undisrupted	fimbrial family protein	VK055_4232_.	NA	NA	NA	NA	NA	NA
VK055_4233	fim2	Essential	-	4334895	4335443	548	undisrupted	fimbrial subunit type 1	VK055_4233_fim2	NA	NA	NA	NA	NA	NA
VK055_4234	VK055_4234	Essential	+	4335807	4335920	113	undisrupted	hypothetical protein	VK055_4234_.	NA	NA	NA	NA	NA	NA
VK055_4241	VK055_4241	Essential	-	4341353	4341562	209	undisrupted	hypothetical protein	VK055_4241_.	NA	NA	NA	NA	NA	NA
VK055_4248	VK055_4248	Essential	-	4348700	4349272	572	undisrupted	bacterial regulatory, luxR family protein	VK055_4248_.	NA	NA	NA	NA	NA	NA
VK055_4257	VK055_4257	Essential	-	4357857	4357988	131	undisrupted	hypothetical protein	VK055_4257_.	NA	NA	NA	NA	NA	NA
VK055_4285	VK055_4285	Essential	-	4387871	4388014	143	undisrupted	hypothetical protein	VK055_4285_.	NA	NA	NA	NA	NA	NA
VK055_4288	lgt	Essential	+	4391503	4392378	875	undisrupted	prolipoprotein diacylglyceryl transferase	VK055_4288_lgt	NA	NA	NA	NA	NA	NA
VK055_4289	thyA	Essential	+	4392385	4393179	794	undisrupted	thymidylate synthase	VK055_4289_thyA	Non-essential	Non-essential	Non-essential	Essential	Non-essential	NA
VK055_4290	VK055_4290	Essential	+	4393366	4393908	542	undisrupted	putative prepilin peptidase dependent protein A	VK055_4290_.	NA	NA	NA	NA	NA	NA
VK055_4291	VK055_4291	Essential	+	4393905	4394462	557	undisrupted	prepilin-type N-terminal cleavage/methylation domain protein	VK055_4291_.	NA	NA	NA	NA	NA	NA
VK055_4292	VK055_4292	Essential	+	4394477	4394866	389	undisrupted	hypothetical protein	VK055_4292_.	NA	NA	NA	NA	NA	NA
VK055_4293	VK055_4293	Essential	+	4394851	4395174	323	undisrupted	prepilin-type N-terminal cleavage/methylation domain protein	VK055_4293_.	NA	NA	NA	NA	NA	NA
VK055_4302	VK055_4302	Essential	-	4411462	4412364	902	undisrupted	GHMP kinase N terminal domain protein	VK055_4302_.	NA	NA	Non-essential	NA	NA	NA
VK055_4304	eutP	Essential	-	4413631	4414071	440	undisrupted	ethanolamine utilization protein, EutP	VK055_4304_eutP	NA	NA	NA	NA	Non-essential	NA
VK055_4309	VK055_4309	Essential	-	4417454	4418842	1388	undisrupted	aldehyde dehydrogenase family protein	VK055_4309_.	Non-essential	Non-essential	Non-essential	NA	Non-essential	Non-essential
VK055_4311	ccmL	Essential	-	4419866	4420141	275	undisrupted	carbon dioxide concentrating mechanism protein CcmL	VK055_4311_ccmL	NA	NA	NA	NA	NA	NA
VK055_4314	VK055_4314	Essential	-	4421265	4421711	446	undisrupted	BMC domain protein	VK055_4314_.	NA	NA	NA	NA	NA	NA
VK055_4315	VK055_4315	Essential	-	4421733	4422008	275	undisrupted	BMC domain protein	VK055_4315_.	NA	NA	NA	NA	NA	NA
VK055_4322	VK055_4322	Essential	-	4427943	4428227	284	undisrupted	BMC domain protein	VK055_4322_.	NA	NA	NA	NA	NA	NA
VK055_4323	VK055_4323	Essential	+	4428340	4428486	146	undisrupted	hypothetical protein	VK055_4323_.	NA	NA	NA	NA	NA	NA
VK055_4329	cbiD	Essential	+	4434204	4435343	1139	undisrupted	cobalamin biosynthesis protein CbiD	VK055_4329_cbiD	Non-essential	Non-essential	NA	NA	Non-essential	NA
VK055_4330	cbiE	Essential	+	4435355	4435942	587	undisrupted	precorrin-6y C5,15-methyltransferase (decarboxylating), CbiE subunit	VK055_4330_cbiE	Non-essential	Non-essential	NA	NA	Non-essential	NA
VK055_4331	cbiT	Essential	+	4435932	4436501	569	undisrupted	precorrin-6Y C5,15-methyltransferase (decarboxylating), CbiT subunit	VK055_4331_cbiT	Non-essential	Non-essential	NA	NA	Non-essential	NA
VK055_4333	VK055_4333	Essential	+	4437248	4438303	1055	undisrupted	cobalamin synthesis G family protein	VK055_4333_.	Non-essential	Non-essential	NA	NA	Non-essential	NA
VK055_4340	cbiQ	Essential	+	4442329	4443006	677	undisrupted	cobalt ABC transporter, permease protein CbiQ	VK055_4340_cbiQ	NA	NA	Non-essential	NA	NA	NA
VK055_4341	VK055_4341	Essential	+	4443015	4443839	824	undisrupted	cobalt ABC transporter, ATP-binding family protein	VK055_4341_.	NA	NA	Non-essential	NA	NA	NA
VK055_4345	VK055_4345	Essential	-	4447093	4447169	76	undisrupted	NA	VK055_4345_.	NA	NA	NA	NA	NA	NA
VK055_4346	VK055_4346	Essential	-	4447202	4447278	76	undisrupted	NA	VK055_4346_.	NA	NA	NA	NA	NA	NA
VK055_4349	csdE	Essential	-	4449538	4449969	431	undisrupted	cysteine desulfurase, sulfur acceptor subunit CsdE	VK055_4349_csdE	NA	NA	NA	NA	NA	NA
VK055_4352	gcvA2	Essential	+	4452041	4452865	824	undisrupted	gcvA transcriptional dual regulator	VK055_4352_gcvA2	NA	NA	NA	NA	NA	NA
VK055_4364	VK055_4364	Essential	+	4465593	4465709	116	undisrupted	hypothetical protein	VK055_4364_.	NA	NA	NA	NA	NA	NA
VK055_4366	VK055_4366	Essential	+	4467006	4468403	1397	undisrupted	pyridine nucleotide-disulfide oxidoreductase family protein	VK055_4366_.	NA	NA	NA	NA	NA	NA
VK055_4377	queF	Essential	-	4481158	4482003	845	undisrupted	queuine synthase	VK055_4377_queF	NA	NA	NA	NA	NA	NA
VK055_4378	syd	Essential	+	4482072	4482617	545	undisrupted	secY-interacting protein	VK055_4378_syd	NA	NA	NA	NA	NA	NA
VK055_4385	VK055_4385	Essential	+	4489418	4490557	1139	undisrupted	glycerate kinase I	VK055_4385_.	Non-essential	NA	Non-essential	NA	Non-essential	NA
VK055_4390	pyrG	Essential	+	4498426	4500063	1637	undisrupted	CTP synthase	VK055_4390_pyrG	Non-essential	Non-essential	Non-essential	Non-essential	Essential	NA
VK055_4391	eno	Essential	+	4500145	4501443	1298	undisrupted	phosphopyruvate hydratase	VK055_4391_eno	Non-essential	Non-essential	Non-essential	Non-essential	Non-essential	NA
VK055_4393	VK055_4393	Essential	-	4502800	4502928	128	undisrupted	hypothetical protein	VK055_4393_.	NA	NA	NA	NA	NA	NA
VK055_4396	VK055_4396	Essential	+	4504168	4504341	173	undisrupted	hypothetical protein	VK055_4396_.	NA	NA	NA	NA	NA	NA
VK055_4399	cysH	Essential	+	4508095	4508829	734	undisrupted	phosphoadenosine phosphosulfate reductase	VK055_4399_cysH	Non-essential	Non-essential	Non-essential	Non-essential	Non-essential	NA
VK055_4406	ftsB	Essential	+	4515079	4515396	317	undisrupted	essential cell division protein FtsB	VK055_4406_ftsB	NA	NA	NA	NA	NA	NA
VK055_4407	ispD	Essential	+	4515416	4516126	710	undisrupted	4-diphosphocytidyl-2C-methyl-D-erythritol synthetase	VK055_4407_ispD	Non-essential	Non-essential	Essential	NA	Essential	NA
VK055_4408	ispF	Essential	+	4516126	4516605	479	undisrupted	2-C-methyl-D-erythritol 2,4-cyclodiphosphate synthase	VK055_4408_ispF	Non-essential	Non-essential	Essential	NA	Essential	NA
VK055_4410	surE	Essential	+	4517632	4518393	761	undisrupted	5'/3'-nucleotidase SurE	VK055_4410_surE	Non-essential	Non-essential	Non-essential	Non-essential	Non-essential	NA
VK055_4417	VK055_4417	Essential	-	4524059	4524466	407	undisrupted	marR family protein	VK055_4417_.	NA	NA	NA	NA	NA	NA
VK055_4418	bsdB	Essential	+	4524640	4525233	593	undisrupted	phenolic acid decarboxylase subunit B	VK055_4418_bsdB	NA	NA	NA	NA	NA	NA
VK055_4420	bsdD	Essential	+	4526671	4526907	236	undisrupted	phenolic acid decarboxylase subunit D	VK055_4420_bsdD	NA	NA	NA	NA	NA	NA
VK055_4428	VK055_4428	Essential	+	4536496	4536789	293	undisrupted	hypothetical protein	VK055_4428_.	NA	NA	NA	NA	NA	NA
VK055_4431	VK055_4431	Essential	+	4539706	4540587	881	undisrupted	bacterial regulatory helix-turn-helix , lysR family protein	VK055_4431_.	NA	NA	NA	NA	NA	NA
VK055_4432	VK055_4432	Essential	+	4540655	4540996	341	undisrupted	nitrous oxide-stimulated promoter family protein	VK055_4432_.	NA	NA	NA	NA	NA	NA
VK055_4447	hypE	Essential	-	4557706	4558674	968	undisrupted	hydrogenase expression/formation protein HypE	VK055_4447_hypE	NA	NA	NA	NA	NA	NA
VK055_4449	hypC	Essential	-	4559834	4560106	272	undisrupted	hydrogenase assembly chaperone HypC/HupF	VK055_4449_hypC	NA	NA	NA	NA	NA	NA
VK055_4450	hypB	Essential	-	4560097	4560858	761	undisrupted	hydrogenase accessory protein HypB	VK055_4450_hypB	NA	NA	Non-essential	Non-essential	NA	NA
VK055_4451	hypA	Essential	-	4560973	4561317	344	undisrupted	hydrogenase nickel insertion protein HypA	VK055_4451_hypA	NA	NA	NA	NA	NA	NA
VK055_4453	VK055_4453	Essential	+	4562059	4562667	608	undisrupted	putative electron transport protein HydN	VK055_4453_.	Non-essential	Non-essential	Non-essential	Non-essential	NA	NA
VK055_4461	hycI	Essential	+	4568894	4569331	437	undisrupted	hydrogenase maturation peptidase HycI	VK055_4461_hycI	NA	NA	NA	NA	NA	NA
VK055_4466	VK055_4466	Essential	+	4574128	4574655	527	undisrupted	putative electron transport protein HydN	VK055_4466_.	NA	NA	NA	NA	NA	NA
VK055_4471	VK055_4471	Essential	-	4580658	4580771	113	undisrupted	hypothetical protein	VK055_4471_.	NA	NA	NA	NA	NA	NA
VK055_4472	gutQ	Essential	-	4582284	4583249	965	undisrupted	D-arabinose 5-phosphate isomerase	VK055_4472_gutQ	Non-essential	Essential	NA	Non-essential	Non-essential	NA
VK055_4476	VK055_4476	Essential	-	4584599	4585378	779	undisrupted	short chain dehydrogenase family protein	VK055_4476_.	Non-essential	Non-essential	Non-essential	NA	Non-essential	NA
VK055_4477	VK055_4477	Essential	-	4585391	4585753	362	undisrupted	PTS system glucitol/sorbitol-specific IIA component family protein	VK055_4477_.	Non-essential	Non-essential	Non-essential	NA	NA	NA
VK055_4481	VK055_4481	Essential	+	4589185	4589862	677	undisrupted	ABC transporter family protein	VK055_4481_.	NA	NA	Non-essential	Non-essential	Non-essential	NA
VK055_4484	VK055_4484	Essential	+	4591766	4592245	479	undisrupted	competence/damage-inducible CinA C-terminal domain protein	VK055_4484_.	NA	NA	Non-essential	NA	NA	NA
VK055_4487	alaS	Essential	+	4594213	4596840	2627	undisrupted	alanine--tRNA ligase	VK055_4487_alaS	Non-essential	Non-essential	NA	NA	Non-essential	NA
VK055_4488	VK055_4488	Essential	+	4597276	4597389	113	undisrupted	global regulator family protein	VK055_4488_.	NA	NA	NA	NA	NA	NA
VK055_4489	VK055_4489	Essential	+	4597712	4597804	92	undisrupted	NA	VK055_4489_.	NA	NA	NA	NA	NA	NA
VK055_4490	VK055_4490	Essential	+	4597809	4597885	76	undisrupted	NA	VK055_4490_.	NA	NA	NA	NA	NA	NA
VK055_4491	VK055_4491	Essential	+	4598036	4598112	76	undisrupted	NA	VK055_4491_.	NA	NA	NA	NA	NA	NA
VK055_4492	VK055_4492	Essential	+	4598174	4598250	76	undisrupted	NA	VK055_4492_.	NA	NA	NA	NA	NA	NA
VK055_4493	VK055_4493	Essential	+	4598479	4598555	76	undisrupted	NA	VK055_4493_.	NA	NA	NA	NA	NA	NA
VK055_4494	VK055_4494	Essential	+	4598910	4599224	314	undisrupted	BON domain protein	VK055_4494_.	NA	NA	NA	NA	NA	NA
VK055_4499	leuA2	Essential	-	4603435	4605111	1676	undisrupted	2-isopropylmalate synthase	VK055_4499_leuA2	Non-essential	Non-essential	Non-essential	Non-essential	Non-essential	NA
VK055_4509	proV	Essential	-	4612104	4613306	1202	undisrupted	proV	VK055_4509_proV	Non-essential	Non-essential	Non-essential	Non-essential	Non-essential	NA
VK055_4513	VK055_4513	Essential	-	4617157	4617342	185	undisrupted	glutaredoxin family protein	VK055_4513_.	NA	NA	NA	NA	NA	NA
VK055_4520	stpA	Essential	+	4621726	4622127	401	undisrupted	H-NS-like DNA-binding protein with RNA chaperoneactivity	VK055_4520_stpA	NA	NA	NA	NA	NA	NA
VK055_4521	VK055_4521	Essential	-	4622200	4622325	125	undisrupted	hypothetical protein	VK055_4521_.	NA	NA	NA	NA	NA	NA
VK055_4522	VK055_4522	Essential	-	4623468	4624013	545	undisrupted	rhodanese-like domain protein	VK055_4522_.	NA	NA	Non-essential	NA	NA	NA
VK055_4524	VK055_4524	Essential	-	4624021	4624320	299	undisrupted	transcription activator HlyU	VK055_4524_.	NA	NA	NA	NA	NA	NA
VK055_4529	VK055_4529	Essential	+	4630330	4630461	131	undisrupted	hypothetical protein	VK055_4529_.	NA	NA	NA	NA	NA	NA
VK055_4536	VK055_4536	Essential	-	4639110	4639778	668	undisrupted	gram-negative pili assembly chaperone, C-terminal domain protein	VK055_4536_.	NA	NA	NA	NA	NA	NA
VK055_4538	VK055_4538	Essential	-	4640475	4641176	701	undisrupted	bacterial regulatory, luxR family protein	VK055_4538_.	NA	NA	NA	NA	NA	NA
VK055_4541	VK055_4541	Essential	-	4643126	4643920	794	undisrupted	short chain dehydrogenase family protein	VK055_4541_.	NA	NA	NA	NA	NA	NA
VK055_4547	VK055_4547	Essential	-	4649086	4649949	863	undisrupted	xylose isomerase-like TIM barrel family protein	VK055_4547_.	NA	NA	NA	NA	NA	NA
VK055_4553	rarA	Essential	+	4657570	4657932	362	undisrupted	bacterial regulatory helix-turn-helix, AraC family protein	VK055_4553_rarA	NA	NA	NA	NA	NA	NA
VK055_4556	VK055_4556	Essential	+	4659736	4660536	800	undisrupted	putative oxalate/formate antiporter	VK055_4556_.	NA	NA	NA	NA	NA	Non-essential
VK055_4559	VK055_4559	Essential	+	4662373	4662663	290	undisrupted	rnfH Ubiquitin family protein	VK055_4559_.	NA	NA	NA	NA	NA	NA
VK055_4563	ppnK	Essential	-	4664967	4665845	878	undisrupted	NAD kinase monomer	VK055_4563_ppnK	Non-essential	Non-essential	Essential	NA	Essential	NA
VK055_4564	grpE	Essential	+	4665970	4666560	590	undisrupted	phage lambda replication host DNA synthesis heatshock protein repair	VK055_4564_grpE	NA	NA	NA	NA	NA	NA
VK055_4567	ffh	Essential	+	4668942	4670306	1364	undisrupted	signal recognition particle protein	VK055_4567_ffh	NA	NA	NA	NA	NA	NA
VK055_4568	rpsP	Essential	+	4670566	4670814	248	undisrupted	ribosomal protein S16	VK055_4568_rpsP	NA	NA	NA	NA	NA	NA
VK055_4569	rimM	Essential	+	4670923	4671381	458	undisrupted	16S rRNA processing protein RimM	VK055_4569_rimM	NA	NA	NA	NA	NA	NA
VK055_4570	trmD	Essential	+	4671413	4672180	767	undisrupted	tRNA (guanine(37)-N(1))-methyltransferase	VK055_4570_trmD	NA	NA	NA	NA	NA	NA
VK055_4582	VK055_4582	Essential	-	4682299	4683036	737	undisrupted	bamD	VK055_4582_.	NA	NA	NA	NA	NA	NA
VK055_4586	VK055_4586	Essential	+	4688052	4689579	1527	undisrupted	NA	VK055_4586_.	NA	NA	NA	NA	NA	NA
VK055_4587	VK055_4587	Essential	+	4689670	4689745	75	undisrupted	NA	VK055_4587_.	NA	NA	NA	NA	NA	NA
VK055_4588	VK055_4588	Essential	+	4689930	4692829	2899	undisrupted	NA	VK055_4588_.	NA	NA	NA	NA	NA	NA
VK055_4589	VK055_4589	Essential	+	4693027	4693141	114	undisrupted	NA	VK055_4589_.	NA	NA	NA	NA	NA	NA
VK055_4590	VK055_4590	Essential	+	4693223	4693336	113	undisrupted	hypothetical protein	VK055_4590_.	NA	NA	NA	NA	NA	NA
VK055_4592	VK055_4592	Essential	-	4694853	4695176	323	undisrupted	hypothetical protein	VK055_4592_.	NA	NA	NA	NA	NA	NA
VK055_4593	pssA	Essential	-	4695218	4696573	1355	undisrupted	CDP-diacylglycerol--serine O-phosphatidyltransferase	VK055_4593_pssA	Essential	Non-essential	Non-essential	Essential	Essential	NA
VK055_4603	rpoE	Essential	+	4707576	4708151	575	undisrupted	RNA polymerase sigma factor RpoE	VK055_4603_rpoE	NA	NA	NA	NA	NA	NA
VK055_4606	VK055_4606	Essential	+	4709787	4710266	479	undisrupted	positive regulator of sigma(E), RseC/MucC familyprotein	VK055_4606_.	NA	NA	NA	NA	NA	NA
VK055_4607	lepA	Essential	+	4710452	4712251	1799	undisrupted	GTP-binding protein LepA	VK055_4607_lepA	NA	NA	NA	NA	NA	NA
VK055_4608	lepB	Essential	+	4712267	4713241	974	undisrupted	signal peptidase I	VK055_4608_lepB	NA	NA	NA	NA	NA	NA
VK055_4609	rnc	Essential	+	4713491	4714171	680	undisrupted	ribonuclease III	VK055_4609_rnc	NA	NA	NA	NA	NA	NA
VK055_4610	era	Essential	+	4714168	4715073	905	undisrupted	GTP-binding protein Era	VK055_4610_era	NA	NA	NA	NA	NA	NA
VK055_4612	pdxJ	Essential	+	4715834	4716565	731	undisrupted	pyridoxine 5'-phosphate synthase	VK055_4612_pdxJ	Non-essential	Non-essential	Non-essential	NA	Essential	NA
VK055_4613	acpS	Essential	+	4716565	4716945	380	undisrupted	holo-[acyl-carrier-protein] synthase	VK055_4613_acpS	Non-essential	Non-essential	NA	NA	Essential	NA
VK055_4616	VK055_4616	Essential	+	4718361	4718972	611	undisrupted	haloacid dehalogenase-like hydrolase family protein	VK055_4616_.	NA	NA	NA	NA	NA	NA
VK055_4618	VK055_4618	Essential	+	4719035	4719544	509	undisrupted	putative Cytosine/adenosine deaminase	VK055_4618_.	NA	NA	Non-essential	Non-essential	NA	NA
VK055_4621	VK055_4621	Essential	+	4727262	4727948	686	undisrupted	yfhG lipofamily protein	VK055_4621_.	NA	NA	NA	NA	NA	NA
VK055_4626	VK055_4626	Essential	-	4732576	4732998	422	undisrupted	SURF4 family protein	VK055_4626_.	NA	NA	NA	NA	NA	NA
VK055_4627	VK055_4627	Essential	-	4733072	4734268	1196	undisrupted	ROK family protein	VK055_4627_.	NA	NA	Non-essential	Non-essential	NA	NA
VK055_4634	VK055_4634	Essential	+	4743242	4744222	980	undisrupted	high-affinity nickel-transport family protein	VK055_4634_.	NA	NA	NA	NA	NA	NA
VK055_4636	suhB	Essential	-	4745205	4746008	803	undisrupted	inositol monophosphatase, putative mRNA turnover protein	VK055_4636_suhB	Non-essential	Non-essential	Non-essential	NA	Non-essential	NA
VK055_4638	iscR	Essential	+	4747137	4747589	452	undisrupted	iscR transcriptional regulator IscR transcriptional dual regulator	VK055_4638_iscR	NA	NA	NA	NA	NA	NA
VK055_4639	iscS	Essential	+	4747768	4748982	1214	undisrupted	cysteine desulfurase IscS	VK055_4639_iscS	Non-essential	Non-essential	Non-essential	Non-essential	Non-essential	NA
VK055_4640	VK055_4640	Essential	+	4749009	4749395	386	undisrupted	scaffold protein involved in iron-sulfur cluster assembly	VK055_4640_.	NA	NA	NA	NA	NA	NA
VK055_4641	iscA	Essential	+	4749413	4749736	323	undisrupted	iron-sulfur cluster assembly protein	VK055_4641_iscA	NA	NA	NA	NA	NA	NA
VK055_4642	hscB	Essential	+	4749811	4750326	515	undisrupted	fe-S protein assembly co-chaperone	VK055_4642_hscB	NA	NA	NA	NA	NA	NA
VK055_4643	hscA	Essential	+	4750342	4752192	1850	undisrupted	fe-S protein assembly chaperone HscA	VK055_4643_hscA	NA	NA	NA	NA	Non-essential	NA
VK055_4644	fdx	Essential	+	4752194	4752529	335	undisrupted	ferredoxin, 2Fe-2S type, ISC system	VK055_4644_fdx	NA	NA	NA	NA	NA	NA
VK055_4645	iscX	Essential	+	4752531	4752731	200	undisrupted	feS assembly protein IscX	VK055_4645_iscX	NA	NA	NA	NA	NA	NA
VK055_4652	ndk	Essential	+	4764601	4765032	431	undisrupted	ndk	VK055_4652_ndk	Non-essential	Non-essential	Non-essential	Non-essential	Essential	NA
VK055_4654	VK055_4654	Essential	+	4766959	4767954	995	undisrupted	putative membrane protein	VK055_4654_.	NA	NA	NA	NA	NA	NA
VK055_4655	ispG	Essential	+	4767981	4769102	1121	undisrupted	4-hydroxy-3-methylbut-2-en-1-yl diphosphate synthase	VK055_4655_ispG	Non-essential	Non-essential	Essential	NA	Essential	NA
VK055_4656	hisS	Essential	+	4769224	4770468	1244	undisrupted	histidine--tRNA ligase	VK055_4656_hisS	Non-essential	Non-essential	NA	NA	Non-essential	NA
VK055_4657	VK055_4657	Essential	+	4770503	4771123	620	undisrupted	hypothetical protein	VK055_4657_.	NA	NA	NA	NA	NA	NA
VK055_4659	engA	Essential	+	4772435	4773904	1469	undisrupted	ribosome-associated GTPase EngA	VK055_4659_engA	NA	NA	Non-essential	Non-essential	NA	NA
VK055_4661	VK055_4661	Essential	+	4775428	4775664	236	undisrupted	hypothetical protein	VK055_4661_.	NA	NA	NA	NA	NA	NA
VK055_4666	guaA	Essential	+	4780263	4781840	1577	undisrupted	guaA GMP synthetase	VK055_4666_guaA	Non-essential	Non-essential	Non-essential	Non-essential	Non-essential	NA
VK055_4670	VK055_4670	Essential	-	4789521	4789640	119	undisrupted	hypothetical protein	VK055_4670_.	NA	NA	NA	NA	NA	NA
VK055_4675	VK055_4675	Essential	+	4795137	4795253	116	undisrupted	hypothetical protein	VK055_4675_.	NA	NA	NA	NA	NA	NA
VK055_4692	hda	Essential	+	4817074	4817751	677	undisrupted	dnaA regulatory inactivator Hda	VK055_4692_hda	NA	NA	NA	NA	NA	NA
VK055_4699	dapA	Essential	+	4823208	4824050	842	undisrupted	dihydrodipicolinate synthase	VK055_4699_dapA	Essential	Non-essential	Non-essential	Non-essential	Essential	NA
VK055_4704	VK055_4704	Essential	+	4829117	4829812	695	undisrupted	phospholipase/Carboxylesterase family protein	VK055_4704_.	NA	NA	NA	NA	NA	NA
VK055_4705	VK055_4705	Essential	-	4829861	4830064	203	undisrupted	hypothetical protein	VK055_4705_.	NA	NA	NA	NA	NA	NA
VK055_4706	dapE	Essential	-	4830091	4831218	1127	undisrupted	succinyl-diaminopimelate desuccinylase	VK055_4706_dapE	Essential	Non-essential	Non-essential	Non-essential	Essential	Non-essential
VK055_4715	VK055_4715	Essential	+	4845111	4845446	335	undisrupted	BMC domain protein	VK055_4715_.	NA	NA	NA	NA	NA	NA
VK055_4717	VK055_4717	Essential	+	4845916	4846605	689	undisrupted	cupin domain protein	VK055_4717_.	NA	NA	NA	NA	NA	NA
VK055_4719	pta	Essential	+	4847398	4848414	1016	undisrupted	phosphate acetyltransferase	VK055_4719_pta	Non-essential	Non-essential	Non-essential	Non-essential	Non-essential	NA
VK055_4730	VK055_4730	Essential	+	4858406	4858891	485	undisrupted	putative structural protein, ethanolamine utilization microcompartment	VK055_4730_.	NA	NA	NA	NA	NA	NA
VK055_4735	VK055_4735	Essential	+	4862428	4862877	449	undisrupted	hypothetical protein	VK055_4735_.	NA	NA	NA	NA	NA	NA
VK055_4736	VK055_4736	Essential	+	4862939	4863514	575	undisrupted	hypothetical protein	VK055_4736_.	NA	NA	NA	NA	NA	NA
VK055_4747	crr	Essential	-	4873042	4873551	509	undisrupted	glucose-specific phosphotransferase enzyme IIA component	VK055_4747_crr	Non-essential	Non-essential	Non-essential	Non-essential	NA	NA
VK055_4753	zipA	Essential	+	4878144	4879205	1061	undisrupted	cell division protein ZipA	VK055_4753_zipA	NA	NA	NA	NA	NA	NA
VK055_4754	ligA	Essential	+	4879275	4881290	2015	undisrupted	DNA ligase, NAD-dependent	VK055_4754_ligA	Non-essential	Non-essential	Non-essential	Non-essential	NA	NA
VK055_4758	VK055_4758	Essential	-	4883605	4883680	75	undisrupted	NA	VK055_4758_.	NA	NA	NA	NA	NA	NA
VK055_4759	VK055_4759	Essential	-	4883685	4883760	75	undisrupted	NA	VK055_4759_.	NA	NA	NA	NA	NA	NA
VK055_4760	VK055_4760	Essential	-	4883807	4883882	75	undisrupted	NA	VK055_4760_.	NA	NA	NA	NA	NA	NA
VK055_4761	VK055_4761	Essential	-	4883928	4884003	75	undisrupted	NA	VK055_4761_.	NA	NA	NA	NA	NA	NA
VK055_4762	gltX	Essential	+	4884263	4885681	1418	undisrupted	glutamate--tRNA ligase	VK055_4762_gltX	Non-essential	Non-essential	Non-essential	Non-essential	Essential	NA
VK055_4763	VK055_4763	Essential	-	4885733	4886125	392	undisrupted	hypothetical protein	VK055_4763_.	NA	NA	NA	NA	NA	NA
VK055_4765	VK055_4765	Essential	+	4886702	4886777	75	undisrupted	NA	VK055_4765_.	NA	NA	NA	NA	NA	NA
VK055_4766	VK055_4766	Essential	+	4886819	4886894	75	undisrupted	NA	VK055_4766_.	NA	NA	NA	NA	NA	NA
VK055_4777	VK055_4777	Essential	+	4900444	4900557	113	undisrupted	hypothetical protein	VK055_4777_.	NA	NA	NA	NA	NA	NA
VK055_4788	VK055_4788	Essential	+	4911149	4911391	242	undisrupted	hypothetical protein	VK055_4788_.	NA	NA	NA	NA	NA	NA
VK055_4791	sixA	Essential	+	4915314	4915700	386	undisrupted	phosphohistidine phosphatase SixA	VK055_4791_sixA	NA	NA	NA	NA	NA	NA
VK055_4792	VK055_4792	Essential	-	4915721	4916272	551	undisrupted	smr domain protein	VK055_4792_.	NA	NA	NA	NA	NA	NA
VK055_4798	VK055_4798	Essential	+	4920715	4920996	281	undisrupted	yfcL family protein	VK055_4798_.	NA	NA	NA	NA	NA	NA
VK055_4800	fabB	Essential	+	4923229	4924425	1196	undisrupted	fabB	VK055_4800_fabB	Essential	Non-essential	NA	Essential	Non-essential	NA
VK055_4802	VK055_4802	Essential	-	4925897	4926787	890	undisrupted	putative flagellar assembly protein	VK055_4802_.	NA	NA	NA	NA	NA	NA
VK055_4807	accD	Essential	+	4930882	4931802	920	undisrupted	acetyl-CoA carboxylase, carboxyl transferase, beta subunit	VK055_4807_accD	Essential	Non-essential	Non-essential	Non-essential	Non-essential	NA
VK055_4808	folC	Essential	+	4931878	4933146	1268	undisrupted	folyl-polyglutamate synthetase	VK055_4808_folC	Non-essential	Non-essential	Essential	NA	Essential	NA
VK055_4809	VK055_4809	Essential	+	4933175	4933825	650	undisrupted	cell division protein DedD	VK055_4809_.	NA	NA	NA	NA	NA	NA
VK055_4812	ubiX2	Essential	+	4936217	4936786	569	undisrupted	3-octaprenyl-4-hydroxybenzoate decarboxylase together with UbiG	VK055_4812_ubiX2	Non-essential	Non-essential	Non-essential	NA	NA	NA
VK055_4818	VK055_4818	Essential	+	4940373	4941146	773	undisrupted	hisP	VK055_4818_.	Non-essential	Non-essential	Non-essential	Non-essential	Non-essential	NA
VK055_4819	VK055_4819	Essential	-	4941152	4941679	527	undisrupted	acetyltransferase family protein	VK055_4819_.	NA	NA	NA	NA	NA	NA
VK055_4821	VK055_4821	Essential	+	4941799	4941915	116	undisrupted	hypothetical protein	VK055_4821_.	NA	NA	NA	NA	NA	NA
VK055_4830	VK055_4830	Essential	+	4950430	4950924	494	undisrupted	yfbU domain protein	VK055_4830_.	NA	NA	NA	NA	NA	NA
VK055_4841	nuoF	Essential	+	4961429	4962766	1337	undisrupted	NADH oxidoreductase (quinone), F subunit	VK055_4841_nuoF	Non-essential	Non-essential	Non-essential	Non-essential	Non-essential	NA
VK055_4856	menC	Essential	+	4979221	4980186	965	undisrupted	o-succinylbenzoate synthase	VK055_4856_menC	Non-essential	Non-essential	Essential	NA	Essential	NA
VK055_4871	VK055_4871	Essential	-	4996821	4997075	254	undisrupted	2Fe-2S iron-sulfur cluster binding domain protein	VK055_4871_.	NA	NA	NA	NA	NA	NA
VK055_4872	nrdB	Essential	-	4997075	4998205	1130	undisrupted	nrdB	VK055_4872_nrdB	Non-essential	Non-essential	Non-essential	Non-essential	NA	NA
VK055_4873	VK055_4873	Essential	-	4998307	5000592	2285	undisrupted	ribonucleoside-diphosphate reductase, alpha subunit	VK055_4873_.	Non-essential	Non-essential	Non-essential	Non-essential	Non-essential	NA
VK055_4874	ubiG	Essential	-	5000937	5001665	728	undisrupted	3-demethylubiquinone-9 3-O-methyltransferase	VK055_4874_ubiG	Non-essential	Non-essential	NA	NA	Non-essential	NA
VK055_4875	gyrA	Essential	+	5001812	5004448	2636	undisrupted	DNA gyrase, A subunit	VK055_4875_gyrA	NA	NA	NA	NA	NA	NA
VK055_4876	VK055_4876	Essential	-	5004559	5005050	491	undisrupted	thiolase, C-terminal domain protein	VK055_4876_.	NA	Non-essential	NA	NA	NA	NA
VK055_4883	rcsB	Essential	-	5014553	5015203	650	undisrupted	rcsB	VK055_4883_rcsB	NA	NA	NA	NA	NA	NA
VK055_4888	VK055_4888	Essential	+	5022039	5022692	653	undisrupted	alkB repair system for alkylated DNA and RNA	VK055_4888_.	NA	NA	NA	NA	Non-essential	NA
VK055_4895	VK055_4895	Essential	-	5031140	5031216	76	undisrupted	NA	VK055_4895_.	NA	NA	NA	NA	NA	NA
VK055_4897	VK055_4897	Essential	-	5033072	5033383	311	undisrupted	hypothetical protein	VK055_4897_.	NA	NA	NA	NA	NA	NA
VK055_4898	yjeK	Essential	+	5033486	5034493	1007	undisrupted	DNA-associated protein	VK055_4898_yjeK	NA	NA	NA	NA	NA	NA
VK055_4899	VK055_4899	Essential	-	5034513	5035274	761	undisrupted	deoR C terminal sensor domain protein	VK055_4899_.	NA	NA	NA	NA	NA	NA
VK055_4903	rplY	Essential	-	5038309	5038593	284	undisrupted	50S ribosomal subunit protein L25	VK055_4903_rplY	NA	NA	NA	NA	NA	NA
VK055_4916	VK055_4916	Essential	-	5053417	5054883	1466	undisrupted	D-mannonate oxidoreductase	VK055_4916_.	NA	NA	Non-essential	NA	Non-essential	NA
VK055_4922	VK055_4922	Essential	+	5060422	5061552	1130	undisrupted	phosphocarrier, HPr family protein	VK055_4922_.	Non-essential	Non-essential	Non-essential	NA	NA	NA
VK055_4929	VK055_4929	Essential	-	5069278	5069424	146	undisrupted	hypothetical protein	VK055_4929_.	NA	NA	NA	NA	NA	NA
VK055_4931	fghA	Essential	-	5071552	5072385	833	undisrupted	S-formylglutathione hydrolase	VK055_4931_fghA	Non-essential	Non-essential	Non-essential	NA	Non-essential	NA
VK055_4932	folE	Essential	+	5072746	5073414	668	undisrupted	GTP cyclohydrolase I	VK055_4932_folE	Non-essential	Non-essential	Essential	NA	Non-essential	NA
VK055_4947	VK055_4947	Essential	-	5090302	5090487	185	undisrupted	hypothetical protein	VK055_4947_.	NA	NA	NA	NA	NA	NA
VK055_4956	VK055_4956	Essential	+	5100661	5101818	1157	undisrupted	binding-protein-dependent transport system innermembrane component family protein	VK055_4956_.	Non-essential	Non-essential	Non-essential	NA	Non-essential	NA
VK055_4959	VK055_4959	Essential	-	5103454	5103567	113	undisrupted	putative uPF0387 membrane protein yohO	VK055_4959_.	NA	NA	NA	NA	NA	NA
VK055_4965	VK055_4965	Essential	-	5110126	5110587	461	undisrupted	acetyltransferase family protein	VK055_4965_.	NA	NA	NA	NA	NA	NA
VK055_4974	VK055_4974	Essential	-	5121151	5121285	134	undisrupted	hypothetical protein	VK055_4974_.	NA	NA	NA	NA	NA	NA
VK055_4975	thiM	Essential	+	5121529	5122224	695	undisrupted	hydroxyethylthiazole kinase	VK055_4975_thiM	Non-essential	Non-essential	Non-essential	NA	Non-essential	NA
VK055_4976	thiD	Essential	+	5122221	5123021	800	undisrupted	phosphomethylpyrimidine kinase	VK055_4976_thiD	Non-essential	Non-essential	Non-essential	Non-essential	Non-essential	NA
VK055_4984	xylB3	Essential	+	5131831	5133294	1463	undisrupted	xylulokinase	VK055_4984_xylB3	Non-essential	Non-essential	Non-essential	NA	Non-essential	NA
VK055_4993	yegS	Essential	-	5142343	5143236	893	undisrupted	lipid kinase YegS	VK055_4993_yegS	NA	NA	Non-essential	Non-essential	NA	NA
VK055_5003	VK055_5003	Essential	-	5158786	5158926	140	undisrupted	hypothetical protein	VK055_5003_.	NA	NA	NA	NA	NA	NA
VK055_5016	wzb	Essential	+	5176147	5176581	434	undisrupted	putative acid phosphatase Wzb	VK055_5016_wzb	NA	NA	Non-essential	NA	NA	NA
VK055_5017	etk	Essential	+	5176600	5178768	2168	undisrupted	tyrosine-protein kinase etk	VK055_5017_etk	NA	NA	NA	NA	NA	NA
VK055_5018	VK055_5018	Essential	+	5178828	5179904	1076	undisrupted	glycosyl transferases group 1 family protein	VK055_5018_.	NA	Non-essential	Non-essential	Non-essential	NA	NA
VK055_5019	VK055_5019	Essential	+	5179934	5181055	1121	undisrupted	glycosyl transferases group 1 family protein	VK055_5019_.	NA	NA	NA	NA	NA	NA
VK055_5020	VK055_5020	Essential	+	5181061	5182227	1166	undisrupted	glycosyl transferases group 1 family protein	VK055_5020_.	NA	NA	NA	NA	NA	NA
VK055_5021	VK055_5021	Essential	+	5182229	5183473	1244	undisrupted	putative serotype K2 polymerase	VK055_5021_.	NA	NA	NA	NA	NA	NA
VK055_5022	wzx	Essential	+	5183491	5184948	1457	undisrupted	polysaccharide biosynthesis family protein	VK055_5022_wzx	NA	NA	NA	NA	NA	NA
VK055_5023	VK055_5023	Essential	+	5184979	5186718	1739	undisrupted	hypothetical protein	VK055_5023_.	NA	NA	NA	NA	NA	NA
VK055_5024	VK055_5024	Essential	+	5186743	5187411	668	undisrupted	hypothetical protein	VK055_5024_.	NA	NA	NA	NA	NA	NA
VK055_5027	manC	Essential	+	5190701	5192116	1415	undisrupted	mannose-1-phosphate guanylyltransferase/mannose-6-phosphate isomerase	VK055_5027_manC	NA	Non-essential	Non-essential	NA	Non-essential	NA
VK055_5028	manB	Essential	+	5192139	5193509	1370	undisrupted	phosphoglucomutase/phosphomannomutase, C-terminal domain protein	VK055_5028_manB	NA	Non-essential	Non-essential	Essential	Non-essential	NA
VK055_5029	ugd	Essential	+	5193673	5194839	1166	undisrupted	nucleotide sugar dehydrogenase family protein	VK055_5029_ugd	Non-essential	Essential	NA	Non-essential	Non-essential	NA
VK055_5030	VK055_5030	Essential	-	5195786	5196790	1004	undisrupted	polysaccharide biosynthesis family protein	VK055_5030_.	Non-essential	Essential	NA	Non-essential	Non-essential	NA
VK055_5031	VK055_5031	Essential	+	5197837	5198604	767	undisrupted	ABC-2 type transporter family protein	VK055_5031_.	NA	NA	NA	NA	Non-essential	NA
VK055_5033	VK055_5033	Essential	+	5199360	5201255	1895	undisrupted	glycosyl transferase 8 family protein	VK055_5033_.	NA	NA	NA	NA	NA	NA
VK055_5067	VK055_5067	Essential	+	5236010	5236345	335	undisrupted	hypothetical protein	VK055_5067_.	NA	NA	NA	NA	NA	NA
VK055_5068	VK055_5068	Essential	-	5236351	5237265	914	undisrupted	bacterial regulatory helix-turn-helix , lysR family protein	VK055_5068_.	NA	NA	NA	NA	NA	NA
VK055_5073	VK055_5073	Essential	+	5241835	5241966	131	undisrupted	hypothetical protein	VK055_5073_.	NA	NA	NA	NA	NA	NA
VK055_5075	VK055_5075	Essential	+	5243311	5243859	548	undisrupted	winged helix-turn-helix DNA-binding family protein	VK055_5075_.	NA	NA	NA	NA	NA	NA
VK055_5078	VK055_5078	Essential	+	5247093	5247908	815	undisrupted	hypothetical protein	VK055_5078_.	NA	NA	NA	NA	NA	NA
VK055_5081	VK055_5081	Essential	-	5250792	5252681	1889	undisrupted	type IV secretory system Conjugative DNA transfer family protein	VK055_5081_.	NA	NA	NA	NA	NA	NA
VK055_5082	VK055_5082	Essential	-	5254082	5254213	131	undisrupted	hypothetical protein	VK055_5082_.	NA	NA	NA	NA	NA	NA
VK055_5083	virB11	Essential	-	5254442	5255467	1025	undisrupted	P-type DNA transfer ATPase VirB11	VK055_5083_virB11	NA	NA	NA	NA	NA	NA
VK055_5088	VK055_5088	Essential	-	5259646	5259873	227	undisrupted	putative surface exclusion lipoprotein	VK055_5088_.	NA	NA	NA	NA	NA	NA
VK055_5092	VK055_5092	Essential	-	5264143	5264358	215	undisrupted	transglycosylase SLT domain protein	VK055_5092_.	NA	NA	NA	NA	NA	NA
VK055_5094	VK055_5094	Essential	+	5264925	5265065	140	undisrupted	hypothetical protein	VK055_5094_.	NA	NA	NA	NA	NA	NA
VK055_5098	VK055_5098	Essential	-	5267840	5267962	122	undisrupted	hypothetical protein	VK055_5098_.	NA	NA	NA	NA	NA	NA
VK055_5099	VK055_5099	Essential	+	5268324	5268725	401	undisrupted	bacterial regulatory, luxR family protein	VK055_5099_.	NA	NA	NA	NA	NA	NA
VK055_5100	VK055_5100	Essential	-	5269855	5270076	221	undisrupted	hypothetical protein	VK055_5100_.	NA	NA	NA	NA	NA	NA
VK055_5108	VK055_5108	Essential	-	5280431	5280847	416	undisrupted	PIN domain protein	VK055_5108_.	NA	NA	NA	NA	NA	NA
VK055_5112	VK055_5112	Essential	+	5283527	5283808	281	undisrupted	istB-like ATP binding family protein	VK055_5112_.	NA	NA	NA	NA	NA	NA
VK055_5128	VK055_5128	Essential	-	5317748	5317823	75	undisrupted	NA	VK055_5128_.	NA	NA	NA	NA	NA	NA
VK055_5129	VK055_5129	Essential	+	5317829	5317981	152	undisrupted	hypothetical protein	VK055_5129_.	NA	NA	NA	NA	NA	NA
VK055_5131	VK055_5131	Essential	+	5319581	5319656	75	undisrupted	NA	VK055_5131_.	NA	NA	NA	NA	NA	NA
VK055_5136	VK055_5136	Essential	-	5325479	5326183	704	undisrupted	regulatory protein TetR family	VK055_5136_.	NA	NA	NA	NA	Non-essential	NA
VK055_5138	VK055_5138	Essential	-	5328503	5328578	75	undisrupted	NA	VK055_5138_.	NA	NA	NA	NA	NA	NA
VK055_5143	VK055_5143	Essential	-	5333386	5333461	75	undisrupted	NA	VK055_5143_.	NA	NA	NA	NA	NA	NA
VK055_5144	mtfA2	Essential	-	5333562	5334359	797	undisrupted	protein mtfA	VK055_5144_mtfA2	NA	NA	NA	NA	NA	NA
VK055_5145	VK055_5145	Essential	+	5334453	5334542	89	undisrupted	NA	VK055_5145_.	NA	NA	NA	NA	NA	NA
VK055_5154	VK055_5154	Essential	-	5339689	5340003	314	undisrupted	hypothetical protein	VK055_5154_.	NA	NA	NA	NA	NA	NA
VK055_5156	VK055_5156	Essential	-	5341708	5341968	260	undisrupted	peptidase S24-like family protein	VK055_5156_.	NA	NA	NA	NA	NA	NA
VK055_5163	VK055_5163	Essential	+	5347592	5347726	134	undisrupted	hypothetical protein	VK055_5163_.	NA	NA	NA	NA	NA	NA
VK055_5170	VK055_5170	Essential	+	5352038	5352301	263	undisrupted	hypothetical protein	VK055_5170_.	NA	NA	NA	NA	NA	NA
VK055_5178	VK055_5178	Essential	-	5358727	5358858	131	undisrupted	hypothetical protein	VK055_5178_.	NA	NA	NA	NA	NA	NA
VK055_5179	VK055_5179	Essential	+	5359095	5359586	491	undisrupted	structural protein 3	VK055_5179_.	NA	NA	NA	NA	NA	NA
VK055_5180	VK055_5180	Essential	+	5359630	5359983	353	undisrupted	hypothetical protein	VK055_5180_.	NA	NA	NA	NA	NA	NA
VK055_5181	VK055_5181	Essential	+	5360016	5360279	263	undisrupted	hypothetical protein	VK055_5181_.	NA	NA	NA	NA	NA	NA
VK055_5183	VK055_5183	Essential	+	5364500	5364646	146	undisrupted	hypothetical protein	VK055_5183_.	NA	NA	NA	NA	NA	NA
VK055_5184	VK055_5184	Essential	+	5364643	5366694	2051	undisrupted	putative kinase domain protein	VK055_5184_.	NA	NA	NA	NA	NA	NA
VK055_5185	VK055_5185	Essential	+	5366778	5367710	932	undisrupted	phage tail family protein	VK055_5185_.	NA	NA	NA	NA	NA	NA
VK055_5186	VK055_5186	Essential	+	5367786	5369564	1778	undisrupted	hypothetical protein	VK055_5186_.	NA	NA	NA	NA	NA	NA
VK055_5187	VK055_5187	Essential	+	5369624	5370127	503	undisrupted	hypothetical protein	VK055_5187_.	NA	NA	NA	NA	NA	NA
VK055_5188	VK055_5188	Essential	-	5370312	5370926	614	undisrupted	hypothetical protein	VK055_5188_.	NA	NA	NA	NA	NA	NA
VK055_5189	VK055_5189	Essential	-	5370939	5373092	2153	undisrupted	hypothetical protein	VK055_5189_.	NA	NA	NA	NA	NA	NA
VK055_5190	VK055_5190	Essential	+	5373183	5373761	578	undisrupted	resolvase, N terminal domain protein	VK055_5190_.	NA	NA	NA	NA	NA	NA
VK055_5191	VK055_5191	Essential	+	5374612	5374737	125	undisrupted	helix-turn-helix domain of resolvase family protein	VK055_5191_.	NA	NA	NA	NA	NA	NA
VK055_0011		Non-essential	+	12203	12401	198	disrupted	hypothetical protein	VK055_0011_.	NA	NA	NA	NA	NA	NA
VK055_0013		Non-essential	-	13221	14367	1146	disrupted	outer membrane protein C	VK055_0013_ompC	Non-essential	Essential	Non-essential	Non-essential	NA	NA
VK055_0016		Non-essential	+	16019	17414	1395	disrupted	cytosine-specific methyltransferase	VK055_0016_dcm	Non-essential	Non-essential	NA	Non-essential	NA	NA
VK055_0017		Non-essential	-	17863	18775	912	disrupted	eamA-like transporter family protein	VK055_0017_.	NA	NA	Non-essential	Non-essential	NA	NA
VK055_0018		Non-essential	+	17394	17889	495	disrupted	DNA mismatch endonuclease of the very short patch (VSP) mismatch repair pathway	VK055_0018_.	NA	NA	NA	NA	NA	NA
VK055_0019		Non-essential	+	18958	19870	912	disrupted	conserved inner membrane protein	VK055_0019_yedI	NA	NA	NA	NA	NA	NA
VK055_0020		Non-essential	+	19985	21665	1680	disrupted	diguanylate cyclase domain protein	VK055_0020_.	NA	NA	Non-essential	NA	NA	NA
VK055_0023		Non-essential	-	22543	23158	615	disrupted	positive DNA-binding transcriptional regulator of capsular polysaccharide synthesis, activates its own expression	VK055_0023_rcsA	NA	NA	NA	NA	NA	NA
VK055_0024		Non-essential	+	23542	23974	432	disrupted	yedD-like family protein	VK055_0024_.	NA	NA	NA	NA	NA	NA
VK055_0025		Non-essential	-	24015	25503	1488	disrupted	amylase	VK055_0025_amyK38	Non-essential	Non-essential	Non-essential	NA	Non-essential	NA
VK055_0026		Non-essential	+	25703	26504	801	disrupted	bacterial extracellular solute-binding, 3 familyprotein	VK055_0026_.	NA	NA	Non-essential	Non-essential	NA	NA
VK055_0027		Non-essential	+	26599	27586	987	disrupted	D-cysteine desulfhydrase monomer	VK055_0027_dcyD	Non-essential	Non-essential	Non-essential	NA	Non-essential	NA
VK055_0028		Non-essential	+	27601	28270	669	disrupted	amino ABC transporter, permease , 3-TM region, His/Glu/Gln/Arg/opine family domain protein	VK055_0028_.	NA	NA	Non-essential	Non-essential	NA	NA
VK055_0029		Non-essential	+	28266	29019	753	disrupted	ABC transporter family protein	VK055_0029_.	NA	NA	Non-essential	Non-essential	Non-essential	NA
VK055_0032		Non-essential	+	30812	31469	657	disrupted	bacterial regulatory, luxR family protein	VK055_0032_.	NA	NA	NA	NA	NA	NA
VK055_0033		Non-essential	+	31465	33298	1833	disrupted	excinuclease ABC subunit C	VK055_0033_uvrC	NA	NA	NA	NA	NA	NA
VK055_0038		Non-essential	+	34608	35454	846	disrupted	dihydrodipicolinate synthase	VK055_0038_dapA2	NA	NA	Non-essential	Non-essential	NA	NA
VK055_0039		Non-essential	+	35552	36221	669	disrupted	yecA family protein	VK055_0039_.	NA	NA	NA	NA	NA	NA
VK055_0040		Non-essential	-	36245	37457	1212	disrupted	tyrosine ArAAP transporter	VK055_0040_tyrP	Non-essential	Non-essential	Non-essential	Non-essential	Non-essential	NA
VK055_0042		Non-essential	-	37923	38421	498	disrupted	putative ferritin-1	VK055_0042_.	NA	NA	NA	NA	NA	NA
VK055_0044		Non-essential	+	38828	39467	639	disrupted	putative sugar-phosphate isomerase	VK055_0044_.	NA	NA	Non-essential	Non-essential	Non-essential	NA
VK055_0045		Non-essential	-	39516	40938	1422	disrupted	major Facilitator Superfamily protein	VK055_0045_.	NA	NA	NA	NA	NA	NA
VK055_0046		Non-essential	+	41088	41340	252	disrupted	hypothetical protein	VK055_0046_.	NA	NA	NA	NA	NA	NA
VK055_0047		Non-essential	-	41377	42889	1512	disrupted	major Facilitator Superfamily protein	VK055_0047_.	NA	NA	NA	NA	NA	NA
VK055_0049		Non-essential	-	43183	43654	471	disrupted	ferritin-like domain protein	VK055_0049_.	NA	NA	NA	NA	NA	NA
VK055_0051		Non-essential	+	44583	45564	981	disrupted	periplasmic binding and sugar binding domain of LacI family protein	VK055_0051_.	NA	NA	Non-essential	NA	NA	NA
VK055_0052		Non-essential	+	45626	47141	1515	disrupted	arabinose import ATP-binding protein AraG	VK055_0052_araG	NA	NA	Non-essential	NA	Non-essential	NA
VK055_0053		Non-essential	+	47155	48136	981	disrupted	branched-chain amino acid transport system / permease component family protein	VK055_0053_.	NA	NA	Non-essential	NA	NA	NA
VK055_0054		Non-essential	+	48297	49086	789	disrupted	trehalose-phosphatase	VK055_0054_otsB	Non-essential	Non-essential	Non-essential	Non-essential	Non-essential	NA
VK055_0055		Non-essential	+	49060	50485	1425	disrupted	alpha,alpha-trehalose-phosphate synthase	VK055_0055_otsA	Non-essential	Non-essential	Non-essential	Non-essential	Non-essential	NA
VK055_0056		Non-essential	-	50508	50937	429	disrupted	universal stress protein	VK055_0056_.	NA	NA	NA	NA	NA	NA
VK055_0057		Non-essential	+	51289	52873	1584	disrupted	major Facilitator Superfamily protein	VK055_0057_.	NA	NA	NA	NA	NA	NA
VK055_0058		Non-essential	+	52877	54017	1140	disrupted	glycosyl Hydrolase Family 88 family protein	VK055_0058_.	NA	NA	NA	NA	NA	NA
VK055_0059		Non-essential	-	54078	55812	1734	disrupted	arginine--tRNA ligase	VK055_0059_argS	Non-essential	Non-essential	NA	NA	Non-essential	NA
VK055_0060		Non-essential	+	56047	56617	570	disrupted	yecM family protein	VK055_0060_.	NA	NA	NA	NA	NA	NA
VK055_0061		Non-essential	+	56693	57437	744	disrupted	copper homeostasis protein	VK055_0061_cutC	NA	NA	NA	NA	NA	NA
VK055_0062		Non-essential	-	57518	58523	1005	disrupted	tRNA (mo5U34)-methyltransferase	VK055_0062_cmoB	NA	NA	NA	NA	NA	NA
VK055_0063		Non-essential	-	58519	59263	744	disrupted	tRNA (cmo5U34)-methyltransferase	VK055_0063_cmoA	NA	NA	NA	NA	NA	NA
VK055_0064		Non-essential	-	59302	59698	396	disrupted	MAPEG family protein	VK055_0064_.	NA	NA	NA	NA	NA	NA
VK055_0066		Non-essential	-	60565	61132	567	disrupted	isochorismatase family protein	VK055_0066_.	NA	NA	Non-essential	NA	NA	NA
VK055_0067		Non-essential	+	61450	63187	1737	disrupted	aspartate--tRNA ligase	VK055_0067_aspS	Non-essential	Non-essential	NA	NA	Non-essential	NA
VK055_0073		Non-essential	-	66729	67515	786	disrupted	fecCD transport family protein	VK055_0073_.	Non-essential	Non-essential	Non-essential	Non-essential	NA	NA
VK055_0074		Non-essential	-	67514	68267	753	disrupted	ABC transporter family protein	VK055_0074_.	Non-essential	Non-essential	Non-essential	Non-essential	NA	NA
VK055_0075		Non-essential	+	68345	69290	945	disrupted	high-affinity zinc uptake system protein znuA	VK055_0075_znuA	Non-essential	Non-essential	Non-essential	Non-essential	Non-essential	NA
VK055_0076		Non-essential	+	69368	70625	1257	disrupted	putative peptidase	VK055_0076_.	NA	NA	Non-essential	Non-essential	NA	NA
VK055_0077		Non-essential	+	70742	71717	975	disrupted	lipid A biosynthesis (KDO)2-(lauroyl)-lipid IVA acyltransferase	VK055_0077_msbB	Non-essential	Non-essential	NA	Non-essential	NA	NA
VK055_0078		Non-essential	-	71757	73200	1443	disrupted	pyruvate kinase	VK055_0078_pyk	Non-essential	Non-essential	Non-essential	Non-essential	Non-essential	NA
VK055_0079		Non-essential	-	73325	74195	870	disrupted	helix-turn-helix domain, rpiR family protein	VK055_0079_.	NA	NA	NA	NA	NA	NA
VK055_0081		Non-essential	+	74550	76026	1476	disrupted	glucose-6-phosphate dehydrogenase	VK055_0081_zwf	Non-essential	Non-essential	Non-essential	Non-essential	Non-essential	NA
VK055_0082		Non-essential	+	76260	78060	1800	disrupted	phosphogluconate dehydratase	VK055_0082_edd	Non-essential	Non-essential	Non-essential	Non-essential	Non-essential	NA
VK055_0084		Non-essential	-	78796	79974	1178	disrupted	formate-dependent phosphoribosylglycinamide formyltransferase	VK055_0084_purT	Non-essential	Non-essential	Non-essential	Non-essential	NA	NA
VK055_0086		Non-essential	+	80605	81265	660	disrupted	hypothetical protein	VK055_0086_.	NA	NA	NA	NA	NA	NA
VK055_0087		Non-essential	+	81418	83446	2028	disrupted	protease II	VK055_0087_.	NA	NA	NA	NA	NA	NA
VK055_0088		Non-essential	-	83449	84109	660	disrupted	exonuclease family protein	VK055_0088_.	NA	NA	NA	NA	NA	NA
VK055_0089		Non-essential	-	84187	84421	234	disrupted	DNA polymerase III, &theta subunit	VK055_0089_holE	NA	NA	NA	NA	NA	NA
VK055_0091		Non-essential	+	84908	85778	870	disrupted	copper resistance D family protein	VK055_0091_.	NA	NA	NA	NA	NA	NA
VK055_0095		Non-essential	-	88792	88984	192	disrupted	hypothetical protein	VK055_0095_.	NA	NA	NA	NA	NA	NA
VK055_0096		Non-essential	+	88142	88796	654	disrupted	phosphatase 1 modulates phospho, signals proteinmisfolding	VK055_0096_pphA	NA	NA	Non-essential	NA	NA	NA
VK055_0097		Non-essential	-	89081	89321	240	disrupted	hypothetical protein	VK055_0097_.	NA	NA	NA	NA	NA	NA
VK055_0098		Non-essential	-	89436	90825	1389	disrupted	ribosomal RNA small subunit methyltransferase F	VK055_0098_rsmF	NA	NA	NA	NA	NA	NA
VK055_0099		Non-essential	-	90993	93627	2634	disrupted	hypothetical protein	VK055_0099_.	NA	NA	NA	NA	NA	NA
VK055_0100		Non-essential	-	93595	94879	1284	disrupted	conserved inner membrane protein	VK055_0100_yebS	NA	NA	NA	NA	NA	NA
VK055_0101		Non-essential	+	95011	95509	498	disrupted	free methionine-(R)-sulfoxide reductase	VK055_0101_yebR	NA	NA	Non-essential	NA	NA	NA
VK055_0103		Non-essential	+	96303	98352	2049	disrupted	tail-specific protease	VK055_0103_.	NA	NA	NA	NA	NA	NA
VK055_0104		Non-essential	+	98587	99472	885	disrupted	heat shock , integral membrane protein	VK055_0104_htpX	NA	NA	NA	NA	NA	NA
VK055_0105		Non-essential	-	99537	100908	1371	disrupted	major Facilitator Superfamily protein	VK055_0105_.	NA	NA	NA	NA	NA	NA
VK055_0107		Non-essential	-	101933	102143	210	disrupted	yobH-like family protein	VK055_0107_.	NA	NA	NA	NA	NA	NA
VK055_0109		Non-essential	+	102604	102841	237	disrupted	yebO-like family protein	VK055_0109_.	NA	NA	NA	NA	NA	NA
VK055_0111		Non-essential	+	103988	105734	1746	disrupted	essential cell division FtsI; penicillin-bindingprotein 3	VK055_0111_ftsI	NA	NA	Non-essential	Non-essential	Non-essential	NA
VK055_0112		Non-essential	+	105795	106590	795	disrupted	23S rRNA m1G745 methyltransferase	VK055_0112_yebH	NA	NA	NA	NA	NA	NA
VK055_0114		Non-essential	-	107578	108037	459	disrupted	hypothetical protein	VK055_0114_.	NA	NA	NA	NA	NA	NA
VK055_0115		Non-essential	-	108099	108951	852	disrupted	manZ	VK055_0115_manZ	Non-essential	Non-essential	Non-essential	Non-essential	Non-essential	NA
VK055_0117		Non-essential	-	109820	110792	972	disrupted	manX	VK055_0117_manX	Non-essential	Non-essential	Non-essential	Non-essential	Non-essential	NA
VK055_0118		Non-essential	+	111238	112798	1560	disrupted	transporter associated domain protein	VK055_0118_.	NA	NA	NA	NA	NA	NA
VK055_0119		Non-essential	-	112831	114409	1578	disrupted	putative cyclic-di-GMP phosphodiesterase AdrB	VK055_0119_.	NA	NA	NA	NA	NA	NA
VK055_0120		Non-essential	-	114591	115938	1347	disrupted	L-serine ammonia-lyase	VK055_0120_.	Non-essential	Non-essential	Non-essential	Non-essential	NA	NA
VK055_0121		Non-essential	-	116118	116697	579	disrupted	NUDIX domain protein	VK055_0121_.	NA	NA	Non-essential	NA	NA	NA
VK055_0122		Non-essential	-	116700	118056	1356	disrupted	aminodeoxychorismate synthase, component I	VK055_0122_pabB	Non-essential	Non-essential	Essential	Non-essential	Non-essential	NA
VK055_0123		Non-essential	+	118144	118330	186	disrupted	hypothetical protein	VK055_0123_.	NA	NA	NA	NA	NA	NA
VK055_0124		Non-essential	-	118330	118675	345	disrupted	putative translation initiation inhibitor	VK055_0124_.	NA	NA	NA	NA	NA	NA
VK055_0125		Non-essential	+	118806	120717	1911	disrupted	DEAD/DEAH box helicase family protein	VK055_0125_.	NA	NA	NA	NA	NA	NA
VK055_0127		Non-essential	+	121596	122178	582	disrupted	outer membrane lipo, Slp family protein	VK055_0127_.	NA	NA	NA	NA	NA	NA
VK055_0128		Non-essential	+	122382	124068	1686	disrupted	fadD	VK055_0128_fadD	Non-essential	Non-essential	Non-essential	Non-essential	Essential	NA
VK055_0129		Non-essential	+	124149	125265	1116	disrupted	ribonuclease D	VK055_0129_rnd	NA	NA	NA	NA	NA	NA
VK055_0131		Non-essential	-	125615	126428	813	disrupted	septum site-determining protein MinD	VK055_0131_minD	NA	NA	NA	NA	NA	NA
VK055_0132		Non-essential	-	126451	127150	699	disrupted	septum site-determining protein MinC	VK055_0132_minC	NA	NA	NA	NA	NA	NA
VK055_0134		Non-essential	+	127574	128234	660	disrupted	fumarylacetoacetate hydrolase domain-containing protein 1	VK055_0134_fahHD1	NA	NA	NA	NA	Non-essential	NA
VK055_0136		Non-essential	-	128781	129126	345	disrupted	tellurite resistance protein B	VK055_0136_tehB	NA	NA	NA	NA	NA	NA
VK055_0138		Non-essential	-	129936	131486	1550	disrupted	sodium/proton antiporter NhaB	VK055_0138_nhaB	Non-essential	Non-essential	Non-essential	Non-essential	Non-essential	Non-essential
VK055_0140		Non-essential	+	131734	132454	720	disrupted	fatty acid metabolism transcriptional regulator FadR	VK055_0140_fadR	NA	NA	NA	NA	NA	NA
VK055_0141		Non-essential	-	132528	134043	1515	disrupted	spoVR like family protein	VK055_0141_.	NA	NA	NA	NA	NA	NA
VK055_0143		Non-essential	+	134409	135681	1272	disrupted	FAD dependent oxidoreductase family protein	VK055_0143_.	Non-essential	Non-essential	Non-essential	Non-essential	NA	NA
VK055_0144		Non-essential	+	135690	136761	1071	disrupted	alanine racemase	VK055_0144_alr	Non-essential	Non-essential	Non-essential	Non-essential	Non-essential	NA
VK055_0145		Non-essential	-	136777	138385	1608	disrupted	transporter associated domain protein	VK055_0145_.	NA	NA	Non-essential	Non-essential	Non-essential	NA
VK055_0147		Non-essential	+	139801	140305	504	disrupted	lytic murein transglycosylase E	VK055_0147_mltE	Non-essential	Non-essential	Non-essential	Non-essential	NA	NA
VK055_0148		Non-essential	-	140346	142467	2121	disrupted	tonB-dependent siderophore receptor family protein	VK055_0148_.	NA	NA	Non-essential	NA	NA	NA
VK055_0149		Non-essential	-	142718	144431	1713	disrupted	trehalase family protein	VK055_0149_.	Non-essential	Non-essential	Non-essential	NA	Non-essential	NA
VK055_0150		Non-essential	+	144848	146288	1440	disrupted	hypothetical protein	VK055_0150_.	NA	NA	NA	NA	NA	NA
VK055_0151		Non-essential	+	146314	147211	897	disrupted	A predicted alpha-helical domain with a conserved ER motif family protein	VK055_0151_.	NA	NA	NA	NA	NA	NA
VK055_0152		Non-essential	+	147207	148023	816	disrupted	transglutaminase-like superfamily protein	VK055_0152_.	NA	NA	NA	NA	NA	NA
VK055_0153		Non-essential	+	148057	148786	729	disrupted	proteasome subunit	VK055_0153_.	NA	NA	NA	NA	NA	NA
VK055_0156		Non-essential	+	150304	151264	960	disrupted	fatty acid desaturase family protein	VK055_0156_.	NA	NA	NA	NA	NA	NA
VK055_0157		Non-essential	+	151257	152057	800	disrupted	PhnD/SsuA/transferrin family substrate-binding protein	VK055_0157_.	NA	NA	NA	NA	NA	NA
VK055_0161		Non-essential	+	153869	154859	990	disrupted	tdcB	VK055_0161_tdcB	Non-essential	Non-essential	Non-essential	Non-essential	Non-essential	NA
VK055_0162		Non-essential	+	154884	156216	1332	disrupted	tdcC threonine STP transporter	VK055_0162_tdcC	Non-essential	Non-essential	Non-essential	Non-essential	Non-essential	NA
VK055_0164		Non-essential	+	157480	159775	2295	disrupted	formate acetyltransferase	VK055_0164_pflB	NA	NA	Non-essential	Non-essential	Non-essential	NA
VK055_0165		Non-essential	+	160255	161320	1065	disrupted	ABC transporter, substrate binding protein	VK055_0165_.	NA	NA	Non-essential	Non-essential	Non-essential	NA
VK055_0166		Non-essential	+	161429	162344	915	disrupted	branched-chain amino acid transport system / permease component family protein	VK055_0166_.	NA	NA	Non-essential	Non-essential	NA	NA
VK055_0167		Non-essential	+	162353	163640	1287	disrupted	branched-chain amino acid transport system / permease component family protein	VK055_0167_.	NA	NA	Non-essential	Non-essential	Non-essential	NA
VK055_0168		Non-essential	+	163636	164512	876	disrupted	ABC transporter family protein	VK055_0168_.	NA	NA	Non-essential	Non-essential	Non-essential	NA
VK055_0169		Non-essential	+	164508	165228	720	disrupted	ABC transporter family protein	VK055_0169_.	NA	NA	Non-essential	Non-essential	NA	NA
VK055_0170		Non-essential	-	165233	166127	894	disrupted	putative transcriptional regulator LYSR-type	VK055_0170_.	NA	NA	NA	NA	NA	NA
VK055_0171		Non-essential	+	166410	168054	1644	disrupted	phosphoenolpyruvate carboxykinase	VK055_0171_pckA	NA	NA	Non-essential	Non-essential	Non-essential	NA
VK055_0172		Non-essential	-	168103	168580	477	disrupted	putative N-acetyltransferase	VK055_0172_.	NA	NA	Non-essential	NA	NA	NA
VK055_0173		Non-essential	+	168678	169605	927	disrupted	putative transcriptional regulator	VK055_0173_.	NA	NA	NA	NA	NA	NA
VK055_0174		Non-essential	+	169908	171204	1296	disrupted	H+ symporter family protein	VK055_0174_.	NA	NA	Non-essential	NA	Non-essential	NA
VK055_0175		Non-essential	-	171999	172899	900	disrupted	bacterial regulatory helix-turn-helix , lysR family protein	VK055_0175_.	NA	NA	NA	NA	NA	NA
VK055_0176		Non-essential	+	171218	172025	807	disrupted	bacterial extracellular solute-binding family protein	VK055_0176_.	NA	NA	Non-essential	NA	Non-essential	NA
VK055_0178		Non-essential	+	173681	174380	699	disrupted	RNA pseudouridylate synthase family protein	VK055_0178_.	NA	NA	NA	NA	NA	NA
VK055_0179		Non-essential	-	174405	174945	540	disrupted	hypothetical protein	VK055_0179_.	NA	NA	NA	NA	NA	NA
VK055_0180		Non-essential	-	175059	175389	330	disrupted	AIG2-like family protein	VK055_0180_.	NA	NA	NA	NA	NA	NA
VK055_0182		Non-essential	+	175930	177298	1368	disrupted	type VI secretion system protein, DUF876	VK055_0182_impJ2	NA	NA	NA	NA	NA	NA
VK055_0183		Non-essential	+	177294	177948	654	disrupted	type IV/VI secretion system , DotU family domain protein	VK055_0183_.	NA	NA	NA	NA	NA	NA
VK055_0184		Non-essential	+	177952	179649	1697	disrupted	OmpA family protein	VK055_0184_.	NA	NA	NA	NA	NA	NA
VK055_0186		Non-essential	+	180107	182807	2700	disrupted	valine-glycine repeat protein G	VK055_0186_vgrG2	NA	NA	NA	NA	NA	NA
VK055_0187		Non-essential	+	182803	184681	1878	disrupted	PLD-like domain protein	VK055_0187_.	NA	NA	Non-essential	Non-essential	NA	NA
VK055_0188		Non-essential	+	184680	185955	1275	disrupted	sel1 repeat family protein	VK055_0188_.	NA	NA	NA	NA	NA	NA
VK055_0189		Non-essential	+	185992	187060	1068	disrupted	sel1 repeat family protein	VK055_0189_.	NA	NA	NA	NA	NA	NA
VK055_0191		Non-essential	+	189126	190371	1245	disrupted	sel1 repeat family protein	VK055_0191_.	NA	NA	NA	NA	NA	NA
VK055_0193		Non-essential	+	190966	191689	723	disrupted	putative sel1-like repeat; harboring protein	VK055_0193_.	NA	NA	NA	NA	NA	NA
VK055_0194		Non-essential	+	191726	192791	1065	disrupted	sel1 repeat family protein	VK055_0194_.	NA	NA	NA	NA	NA	NA
VK055_0195		Non-essential	+	193005	193983	978	disrupted	hypothetical protein	VK055_0195_.	NA	NA	NA	NA	NA	NA
VK055_0196		Non-essential	+	194072	194336	264	disrupted	hypothetical protein	VK055_0196_.	NA	NA	NA	NA	NA	NA
VK055_0197		Non-essential	+	194338	195601	1263	disrupted	hypothetical protein	VK055_0197_.	NA	NA	NA	NA	NA	NA
VK055_0198		Non-essential	+	195706	199102	3396	disrupted	intracellular multiplication and human macrophage-killing family protein	VK055_0198_icmF2	NA	NA	NA	NA	NA	NA
VK055_0199		Non-essential	+	199235	200999	1764	disrupted	type VI secretion system protein DUF879	VK055_0199_impG2	NA	NA	NA	NA	NA	NA
VK055_0200		Non-essential	+	200953	202045	1092	disrupted	type VI secretion system protein DUF1305	VK055_0200_impH2	NA	NA	NA	NA	NA	NA
VK055_0201		Non-essential	+	202019	202562	543	disrupted	type VI secretion lipofamily protein	VK055_0201_sciN2	NA	NA	NA	NA	NA	NA
VK055_0202		Non-essential	+	202564	203008	444	disrupted	gene 25-like lysozyme family protein	VK055_0202_.	NA	NA	NA	NA	NA	NA
VK055_0203		Non-essential	+	203027	204443	1416	disrupted	impA-related N-terminal family protein	VK055_0203_impA2	NA	NA	NA	NA	NA	NA
VK055_0204		Non-essential	+	204575	205489	914	disrupted	sugar ABC transporter substrate-binding protein	VK055_0204_.	NA	NA	Non-essential	Non-essential	NA	NA
VK055_0206		Non-essential	-	205984	207076	1092	disrupted	50S ribosome-binding GTPase family protein	VK055_0206_.	NA	NA	NA	NA	NA	NA
VK055_0208		Non-essential	+	208089	208326	237	disrupted	putative inner membrane protein	VK055_0208_.	NA	NA	NA	NA	NA	NA
VK055_0209		Non-essential	+	208363	208519	156	disrupted	hypothetical protein	VK055_0209_.	NA	NA	NA	NA	NA	NA
VK055_0210		Non-essential	-	209593	211246	1653	disrupted	sulfate permease family protein	VK055_0210_sulP	NA	NA	Non-essential	NA	Non-essential	NA
VK055_0211		Non-essential	+	208546	209593	1047	disrupted	merR regulatory family protein	VK055_0211_.	NA	NA	NA	NA	NA	NA
VK055_0221		Non-essential	-	219676	220777	1101	disrupted	chaA calcium CaCA transporter	VK055_0221_.	Non-essential	Non-essential	Non-essential	Non-essential	Non-essential	NA
VK055_0222		Non-essential	+	221019	221271	252	disrupted	chaB family protein	VK055_0222_.	NA	NA	NA	NA	NA	NA
VK055_0223		Non-essential	+	221428	222088	660	disrupted	putative cation transport protein	VK055_0223_.	NA	NA	NA	NA	NA	NA
VK055_0225		Non-essential	-	222305	222548	243	disrupted	hypothetical protein	VK055_0225_.	NA	NA	NA	NA	NA	NA
VK055_0226		Non-essential	-	222785	223139	354	disrupted	dsrE/DsrF-like family protein	VK055_0226_.	NA	NA	NA	NA	NA	NA
VK055_0227		Non-essential	+	223206	224388	1182	disrupted	ANTAR domain protein	VK055_0227_.	NA	NA	NA	NA	NA	NA
VK055_0228		Non-essential	+	224630	225887	1257	disrupted	NMT1-like family protein	VK055_0228_.	NA	NA	Non-essential	NA	Non-essential	NA
VK055_0229		Non-essential	+	225888	226773	885	disrupted	nitrate ABC transporter, permease protein	VK055_0229_ntrB	NA	NA	Non-essential	NA	NA	NA
VK055_0230		Non-essential	+	226782	227571	789	disrupted	nitrate ABC transporter, ATP-binding C and D family protein	VK055_0230_.	NA	NA	Non-essential	NA	Non-essential	NA
VK055_0231		Non-essential	+	228775	231649	2874	disrupted	nitrite reductase [NAD(P)H], small subunit	VK055_0231_nirD	NA	NA	Non-essential	NA	Non-essential	NA
VK055_0232		Non-essential	+	231696	234249	2553	disrupted	molybdopterin dinucleotide binding domain protein	VK055_0232_.	NA	NA	Non-essential	NA	Non-essential	NA
VK055_0233		Non-essential	-	235779	236430	651	disrupted	narL transcriptional dual regulator	VK055_0233_narL	NA	NA	NA	NA	NA	NA
VK055_0234		Non-essential	+	234430	235783	1353	disrupted	hypothetical protein	VK055_0234_.	NA	NA	NA	NA	NA	NA
VK055_0235		Non-essential	-	236440	238219	1779	disrupted	HAMP domain protein	VK055_0235_.	NA	NA	NA	NA	NA	NA
VK055_0236		Non-essential	+	238530	239919	1389	disrupted	narK MFS nitrate/nitrite antiporter	VK055_0236_narK	Non-essential	Non-essential	Non-essential	NA	Non-essential	NA
VK055_0237		Non-essential	+	240044	240158	114	disrupted	hypothetical protein	VK055_0237_.	NA	NA	NA	NA	NA	NA
VK055_0238		Non-essential	+	240324	244068	3744	disrupted	nitrate reductase, alpha subunit	VK055_0238_.	Non-essential	Non-essential	Non-essential	NA	Non-essential	NA
VK055_0239		Non-essential	+	244064	245600	1536	disrupted	nitrate reductase, beta subunit	VK055_0239_narH	Non-essential	Non-essential	Non-essential	NA	Non-essential	NA
VK055_0241		Non-essential	-	246980	247877	897	disrupted	eamA-like transporter family protein	VK055_0241_.	NA	NA	NA	NA	Non-essential	NA
VK055_0242		Non-essential	+	246306	246984	678	disrupted	respiratory nitrate reductase, gamma subunit	VK055_0242_narI	Non-essential	Non-essential	Non-essential	NA	Non-essential	NA
VK055_0243		Non-essential	+	247984	248428	444	disrupted	asnC family protein	VK055_0243_.	NA	NA	NA	NA	NA	NA
VK055_0246		Non-essential	-	249260	250103	843	disrupted	formyltetrahydrofolate deformylase	VK055_0246_purU	Non-essential	Non-essential	Non-essential	Non-essential	Non-essential	NA
VK055_0247		Non-essential	-	250145	250478	333	disrupted	hypothetical protein	VK055_0247_.	NA	NA	NA	NA	NA	NA
VK055_0248		Non-essential	+	250716	251619	903	disrupted	patatin-like phospholipase family protein	VK055_0248_.	NA	NA	NA	NA	NA	NA
VK055_0249		Non-essential	+	251708	252722	1014	disrupted	regulator of RpoS	VK055_0249_hnr	NA	NA	NA	NA	NA	NA
VK055_0250		Non-essential	+	252919	253822	903	disrupted	UTP-glucose-1-phosphate uridylyltransferase	VK055_0250_galU	Essential	Non-essential	Non-essential	Essential	Non-essential	NA
VK055_0253		Non-essential	+	254912	255530	618	disrupted	thymidine kinase family protein	VK055_0253_.	Non-essential	Non-essential	Non-essential	Non-essential	Non-essential	NA
VK055_0254		Non-essential	-	255677	258353	2676	disrupted	adhE	VK055_0254_adhE	Non-essential	Non-essential	Non-essential	Non-essential	Non-essential	NA
VK055_0258		Non-essential	+	260214	261849	1635	disrupted	periplasmic oligopeptide-binding protein	VK055_0258_oppA	Non-essential	Non-essential	Non-essential	Non-essential	NA	NA
VK055_0259		Non-essential	+	261934	262855	921	disrupted	oppB	VK055_0259_oppB	Non-essential	Non-essential	Non-essential	Non-essential	NA	NA
VK055_0260		Non-essential	+	262869	263778	909	disrupted	binding-protein-dependent transport system innermembrane component family protein	VK055_0260_.	Non-essential	Non-essential	Non-essential	Non-essential	NA	NA
VK055_0261		Non-essential	+	263789	264803	1014	disrupted	oppD	VK055_0261_.	Non-essential	Non-essential	Non-essential	Non-essential	Non-essential	NA
VK055_0262		Non-essential	+	264799	265804	1005	disrupted	oligopeptide/dipeptide ABC transporter, ATP-binding , C-terminal domain protein	VK055_0262_.	Non-essential	Non-essential	Non-essential	Non-essential	Non-essential	NA
VK055_0263		Non-essential	+	265858	266686	828	disrupted	ion transport family protein	VK055_0263_.	NA	NA	Non-essential	NA	NA	NA
VK055_0265		Non-essential	-	267112	268573	1461	disrupted	cardiolipin synthase	VK055_0265_cls	Non-essential	Non-essential	Non-essential	Non-essential	NA	NA
VK055_0267		Non-essential	+	269054	269171	117	disrupted	hypothetical protein	VK055_0267_.	NA	NA	NA	NA	NA	NA
VK055_0269		Non-essential	-	270704	271001	297	disrupted	YCII-related domain protein	VK055_0269_.	NA	NA	NA	NA	NA	NA
VK055_0270		Non-essential	+	271220	271958	738	disrupted	tonB protein energy transducer	VK055_0270_.	Non-essential	Non-essential	Non-essential	NA	NA	NA
VK055_0271		Non-essential	-	272001	272874	873	disrupted	phosphotransferase enzyme family protein	VK055_0271_.	NA	NA	NA	NA	NA	NA
VK055_0274		Non-essential	+	274680	275406	726	disrupted	hypothetical protein	VK055_0274_.	NA	NA	NA	NA	NA	NA
VK055_0284		Non-essential	-	283913	285167	1254	disrupted	pyridine nucleotide-disulfide oxidoreductase family protein	VK055_0284_.	NA	NA	Non-essential	Non-essential	NA	NA
VK055_0285		Non-essential	-	285216	286131	915	disrupted	bacterial regulatory helix-turn-helix , lysR family protein	VK055_0285_.	NA	NA	NA	NA	NA	NA
VK055_0286		Non-essential	+	286411	287845	1434	disrupted	citrate transporter family protein	VK055_0286_.	NA	NA	NA	NA	NA	NA
VK055_0287		Non-essential	+	287966	288953	987	disrupted	btuC	VK055_0287_btuC	Non-essential	Non-essential	NA	NA	Non-essential	NA
VK055_0288		Non-essential	-	288989	289790	801	disrupted	metQ	VK055_0288_metQ	NA	NA	NA	NA	NA	NA
VK055_0289		Non-essential	+	290026	290578	552	disrupted	putative glutathione peroxidase	VK055_0289_.	NA	NA	Non-essential	Non-essential	NA	NA
VK055_0292		Non-essential	+	291986	293429	1443	disrupted	hypothetical protein	VK055_0292_.	NA	NA	NA	NA	NA	NA
VK055_0294		Non-essential	-	293793	294840	1047	disrupted	3-deoxy-7-phosphoheptulonate synthase	VK055_0294_.	Non-essential	Non-essential	Non-essential	Non-essential	Non-essential	NA
VK055_0295		Non-essential	-	294994	295828	834	disrupted	putative phosphotransferase	VK055_0295_ydiA	NA	NA	NA	NA	NA	NA
VK055_0297		Non-essential	+	296167	298546	2379	disrupted	phosphoenolpyruvate synthase	VK055_0297_ppsA	Non-essential	Non-essential	Non-essential	Non-essential	Non-essential	NA
VK055_0300		Non-essential	+	301227	304284	3057	disrupted	4Fe-4S dicluster domain protein	VK055_0300_.	NA	NA	Non-essential	NA	Non-essential	NA
VK055_0301		Non-essential	+	304280	304691	411	disrupted	proofreading thioesterase in enterobactin biosynthesis	VK055_0301_ybdB	NA	NA	Non-essential	NA	Non-essential	NA
VK055_0304		Non-essential	+	306145	307126	981	disrupted	hypothetical protein	VK055_0304_.	NA	NA	NA	NA	NA	NA
VK055_0305		Non-essential	+	307149	308181	1032	disrupted	cobalamin-independent synthase, Catalytic domainprotein	VK055_0305_.	NA	NA	Non-essential	Non-essential	NA	NA
VK055_0306		Non-essential	-	308263	309451	1188	disrupted	major Facilitator Superfamily protein	VK055_0306_.	NA	NA	Non-essential	NA	NA	NA
VK055_0307		Non-essential	-	309507	310269	762	disrupted	ABC transporter family protein	VK055_0307_.	NA	NA	Non-essential	NA	NA	NA
VK055_0308		Non-essential	-	310268	311306	1038	disrupted	fecCD transport family protein	VK055_0308_.	NA	NA	Non-essential	NA	NA	NA
VK055_0309		Non-essential	-	311305	312274	969	disrupted	periplasmic binding family protein	VK055_0309_.	NA	NA	Non-essential	NA	NA	NA
VK055_0310		Non-essential	-	312462	313374	912	disrupted	bacterial regulatory helix-turn-helix , lysR family protein	VK055_0310_.	NA	NA	NA	NA	NA	NA
VK055_0311		Non-essential	+	313470	314466	996	disrupted	short chain dehydrogenase family protein	VK055_0311_.	NA	NA	NA	NA	NA	NA
VK055_0312		Non-essential	+	314639	315176	537	disrupted	bacterial regulatory, tetR family protein	VK055_0312_.	NA	NA	NA	NA	NA	NA
VK055_0314		Non-essential	+	316356	319449	3093	disrupted	acrB/AcrD/AcrF family protein	VK055_0314_.	NA	NA	Non-essential	NA	NA	NA
VK055_0315		Non-essential	-	319504	320689	1185	disrupted	L-lactate dehydrogenase	VK055_0315_lctD	NA	NA	Non-essential	NA	Non-essential	Essential
VK055_0320		Non-essential	+	323189	324677	1488	disrupted	feS assembly protein SufB	VK055_0320_sufB	NA	NA	NA	NA	NA	NA
VK055_0321		Non-essential	+	324693	325440	747	disrupted	feS assembly ATPase SufC	VK055_0321_sufC	NA	NA	NA	NA	NA	NA
VK055_0322		Non-essential	+	325414	326689	1275	disrupted	feS assembly protein SufD	VK055_0322_sufD	NA	NA	NA	NA	Non-essential	NA
VK055_0323		Non-essential	+	326685	327906	1221	disrupted	cysteine desulfurase	VK055_0323_sufS	NA	NA	NA	NA	Non-essential	NA
VK055_0324		Non-essential	+	327917	328334	417	disrupted	cysteine desulfuration protein sufE	VK055_0324_sufE	NA	NA	NA	NA	NA	NA
VK055_0325		Non-essential	+	328433	329420	987	disrupted	putative L,D-transpeptidase YcfS	VK055_0325_.	NA	NA	Non-essential	NA	NA	NA
VK055_0327		Non-essential	-	330030	331443	1413	disrupted	pyruvate kinase	VK055_0327_pyk2	Non-essential	Non-essential	Non-essential	Non-essential	Non-essential	NA
VK055_0330		Non-essential	-	332178	332817	639	disrupted	bacterial regulatory, tetR family protein	VK055_0330_.	NA	NA	NA	NA	NA	NA
VK055_0331		Non-essential	+	332943	334872	1929	disrupted	xylose isomerase-like TIM barrel family protein	VK055_0331_.	NA	NA	Non-essential	NA	Non-essential	NA
VK055_0332		Non-essential	+	334868	336191	1323	disrupted	major Facilitator Superfamily protein	VK055_0332_.	NA	NA	Non-essential	NA	NA	NA
VK055_0333		Non-essential	+	336206	337043	837	disrupted	thiF family protein	VK055_0333_.	NA	NA	Non-essential	Non-essential	NA	NA
VK055_0335		Non-essential	+	337099	337843	744	disrupted	bacterial extracellular solute-binding family protein	VK055_0335_.	NA	NA	Non-essential	NA	NA	NA
VK055_0338		Non-essential	-	340719	341532	813	disrupted	bacterial transcriptional regulator family protein	VK055_0338_.	NA	NA	NA	NA	NA	NA
VK055_0339		Non-essential	+	341709	343374	1665	disrupted	3-(3-hydroxy-phenyl)propionate/3-hydroxycinnamic acid hydroxylase	VK055_0339_mhpA	Non-essential	Non-essential	Non-essential	NA	Non-essential	NA
VK055_0340		Non-essential	+	343375	344320	945	disrupted	2,3-dihydroxyphenylpropionate/2, 3-dihydroxicinnamic acid 1,2-dioxygenase	VK055_0340_mhpB	Non-essential	Non-essential	Non-essential	NA	Non-essential	NA
VK055_0342		Non-essential	+	345211	346021	810	disrupted	2-keto-4-pentenoate hydratase	VK055_0342_mhpD	Non-essential	Non-essential	Non-essential	NA	Non-essential	NA
VK055_0343		Non-essential	+	346013	346964	951	disrupted	acetaldehyde dehydrogenase	VK055_0343_.	Non-essential	Non-essential	Non-essential	Non-essential	Non-essential	NA
VK055_0344		Non-essential	+	346960	347977	1017	disrupted	4-hydroxy-2-oxovalerate aldolase	VK055_0344_dmpG	Non-essential	Non-essential	Non-essential	NA	Non-essential	NA
VK055_0345		Non-essential	+	348088	349249	1161	disrupted	sugar (and other) transporter family protein	VK055_0345_.	Non-essential	Non-essential	Non-essential	NA	Non-essential	NA
VK055_0346		Non-essential	+	349351	350077	726	disrupted	multi-copper polyphenol oxidoreductase laccase family protein	VK055_0346_.	NA	NA	NA	NA	NA	NA
VK055_0347		Non-essential	-	350089	351670	1581	disrupted	putative thiosulfate sulfurtransferase	VK055_0347_.	NA	NA	Non-essential	NA	Non-essential	NA
VK055_0348		Non-essential	-	351675	352278	603	disrupted	cysteine dioxygenase type I	VK055_0348_.	NA	NA	NA	NA	NA	NA
VK055_0349		Non-essential	+	352384	353278	894	disrupted	bacterial regulatory helix-turn-helix , lysR family protein	VK055_0349_.	NA	NA	NA	NA	NA	NA
VK055_0350		Non-essential	+	353422	354508	1086	disrupted	luciferase-like monooxygenase family protein	VK055_0350_.	NA	NA	Non-essential	NA	NA	NA
VK055_0351		Non-essential	+	354504	355656	1152	disrupted	acyl-CoA dehydrogenase, C-terminal domain protein	VK055_0351_.	NA	NA	Non-essential	NA	NA	NA
VK055_0353		Non-essential	+	356620	357658	1038	disrupted	NMT1-like family protein	VK055_0353_.	NA	NA	NA	NA	NA	NA
VK055_0354		Non-essential	+	357639	358634	995	disrupted	ABC transporter permease subunit	VK055_0354_.	NA	NA	Non-essential	NA	NA	NA
VK055_0355		Non-essential	+	358627	359416	789	disrupted	ABC transporter family protein	VK055_0355_.	NA	NA	Non-essential	NA	NA	NA
VK055_0356		Non-essential	-	359563	361636	2073	disrupted	tonB-dependent siderophore receptor family protein	VK055_0356_.	NA	NA	Non-essential	NA	NA	NA
VK055_0357		Non-essential	+	361926	362091	165	disrupted	hypothetical protein	VK055_0357_.	NA	NA	NA	NA	NA	NA
VK055_0358		Non-essential	+	362141	362963	822	disrupted	putative siderophore transport system ATP-binding protein yusV	VK055_0358_.	NA	NA	Non-essential	NA	NA	NA
VK055_0360		Non-essential	+	363981	365034	1053	disrupted	fecCD transport family protein	VK055_0360_.	NA	NA	Non-essential	NA	NA	NA
VK055_0361		Non-essential	+	365047	366001	954	disrupted	putative ferrichrome-binding protein	VK055_0361_.	NA	NA	Non-essential	NA	NA	NA
VK055_0363		Non-essential	+	367022	367760	738	disrupted	bacterial extracellular solute-binding, 3 familyprotein	VK055_0363_.	NA	NA	Non-essential	Non-essential	Non-essential	NA
VK055_0364		Non-essential	+	367823	368588	765	disrupted	amino ABC transporter, permease , 3-TM region, His/Glu/Gln/Arg/opine family domain protein	VK055_0364_.	NA	NA	Non-essential	NA	Non-essential	NA
VK055_0366		Non-essential	+	369596	370184	588	disrupted	hypothetical protein	VK055_0366_.	NA	NA	NA	NA	NA	NA
VK055_0367		Non-essential	-	370312	370705	393	disrupted	glyoxalase/Bleomycin resistance /Dioxygenase superfamily protein	VK055_0367_.	NA	NA	NA	NA	NA	NA
VK055_0368		Non-essential	-	370741	371932	1191	disrupted	sugar (and other) transporter family protein	VK055_0368_.	NA	NA	NA	NA	NA	NA
VK055_0369		Non-essential	-	372539	372944	405	disrupted	glyoxalase/Bleomycin resistance /Dioxygenase superfamily protein	VK055_0369_.	NA	NA	NA	NA	NA	NA
VK055_0370		Non-essential	-	373089	374289	1200	disrupted	major Facilitator Superfamily protein	VK055_0370_.	NA	NA	NA	NA	NA	NA
VK055_0371		Non-essential	+	374584	375742	1158	disrupted	amidohydrolase family protein	VK055_0371_.	NA	NA	Non-essential	Non-essential	Non-essential	NA
VK055_0372		Non-essential	-	375784	377935	2151	disrupted	formate dehydrogenase, alpha subunit	VK055_0372_.	NA	NA	Non-essential	NA	Non-essential	NA
VK055_0375		Non-essential	+	379564	380653	1089	disrupted	bacterial extracellular solute-binding family protein	VK055_0375_.	NA	NA	NA	NA	NA	NA
VK055_0376		Non-essential	+	380726	382496	1770	disrupted	binding-protein-dependent transport system innermembrane component family protein	VK055_0376_.	NA	NA	NA	NA	Non-essential	NA
VK055_0377		Non-essential	+	382488	383559	1071	disrupted	ABC transporter family protein	VK055_0377_.	NA	NA	Non-essential	Non-essential	Non-essential	NA
VK055_0379		Non-essential	+	385019	387416	2397	disrupted	CRISPR-associated helicase Cas3	VK055_0379_cas3	NA	NA	Non-essential	Non-essential	NA	NA
VK055_0380		Non-essential	+	387419	388943	1524	disrupted	CRISPR type I-E/ECOLI-associated protein CasA/Cse1	VK055_0380_casA	NA	NA	NA	NA	NA	NA
VK055_0385		Non-essential	+	391953	392829	876	disrupted	CRISPR-associated endonuclease Cas1	VK055_0385_cas1	NA	NA	NA	NA	NA	NA
VK055_0386		Non-essential	+	392854	393094	240	disrupted	CRISPR-associated endoribonuclease Cas2, subtypeI-E/ECOLI	VK055_0386_cas2	NA	NA	NA	NA	NA	NA
VK055_0387		Non-essential	+	393901	395017	1116	disrupted	hypothetical protein	VK055_0387_.	NA	NA	NA	NA	NA	NA
VK055_0388		Non-essential	+	395027	395711	684	disrupted	hypothetical protein	VK055_0388_.	NA	NA	NA	NA	NA	NA
VK055_0389		Non-essential	-	395771	396143	372	disrupted	glyoxalase/Bleomycin resistance /Dioxygenase superfamily protein	VK055_0389_.	NA	NA	NA	NA	NA	NA
VK055_0390		Non-essential	+	396647	397400	753	disrupted	gluconate 2-dehydrogenase subunit 3	VK055_0390_.	NA	NA	Non-essential	NA	Non-essential	NA
VK055_0391		Non-essential	+	397402	399187	1785	disrupted	gluconate 2-dehydrogenase flavoprotein	VK055_0391_.	NA	NA	Non-essential	NA	Non-essential	NA
VK055_0392		Non-essential	+	399206	400538	1332	disrupted	gluconate 2-dehydrogenase cytochrome c subunit	VK055_0392_.	NA	NA	Non-essential	NA	Non-essential	NA
VK055_0397		Non-essential	+	402898	403357	459	disrupted	ccmE	VK055_0397_ccmE	NA	NA	Non-essential	Non-essential	NA	NA
VK055_0398		Non-essential	+	403353	405306	1953	disrupted	cytochrome c-type biogenesis protein CcmF	VK055_0398_ccmF	NA	NA	NA	NA	NA	NA
VK055_0400		Non-essential	+	405868	406315	447	disrupted	cytochrome c-type biogenesis protein CcmH	VK055_0400_ccmH	NA	NA	NA	NA	NA	NA
VK055_0401		Non-essential	+	406311	407154	843	disrupted	cytochrome c biogenesis protein CcmH	VK055_0401_ccmH2	NA	NA	NA	NA	NA	NA
VK055_0402		Non-essential	-	408498	409425	927	disrupted	bacterial regulatory helix-turn-helix, AraC family protein	VK055_0402_.	NA	NA	NA	NA	NA	NA
VK055_0403		Non-essential	+	409569	410421	852	disrupted	oxidoreductase, aldo/keto reductase family	VK055_0403_.	NA	NA	NA	NA	Non-essential	NA
VK055_0404		Non-essential	+	410452	411610	1158	disrupted	alpha/beta hydrolase family protein	VK055_0404_.	NA	NA	NA	NA	NA	NA
VK055_0405		Non-essential	+	411647	412370	723	disrupted	isochorismatase family protein	VK055_0405_.	NA	NA	NA	NA	NA	NA
VK055_0406		Non-essential	-	413380	414151	771	disrupted	diacetyl reductase (S-acetoin forming)	VK055_0406_budC	Non-essential	Non-essential	Non-essential	Non-essential	Non-essential	NA
VK055_0407		Non-essential	-	414174	415854	1680	disrupted	acetolactate synthase, catabolic	VK055_0407_alsS	NA	NA	Non-essential	Non-essential	Non-essential	NA
VK055_0408		Non-essential	-	415863	416643	780	disrupted	alpha-acetolactate decarboxylase	VK055_0408_budA	Non-essential	Non-essential	Non-essential	Non-essential	Non-essential	NA
VK055_0409		Non-essential	+	416749	417622	873	disrupted	bacterial regulatory helix-turn-helix , lysR family protein	VK055_0409_.	NA	NA	NA	NA	NA	NA
VK055_0411		Non-essential	-	418435	419827	1392	disrupted	citrate transporter family protein	VK055_0411_.	NA	Non-essential	Non-essential	NA	Non-essential	NA
VK055_0412		Non-essential	-	419874	420798	924	disrupted	NAD-dependent glycerol-3-phosphate dehydrogenasefamily protein	VK055_0412_.	NA	NA	Non-essential	NA	NA	NA
VK055_0415		Non-essential	-	422658	423366	708	disrupted	3-oxoacid CoA-transferase, A subunit	VK055_0415_.	NA	NA	Non-essential	NA	Non-essential	NA
VK055_0418		Non-essential	+	424871	425780	909	disrupted	hypothetical protein	VK055_0418_.	NA	NA	NA	NA	NA	NA
VK055_0420		Non-essential	+	426467	426617	150	disrupted	putative chromate transporter	VK055_0420_.	NA	NA	Non-essential	NA	NA	NA
VK055_0421		Non-essential	-	426671	428093	1422	disrupted	FAD binding domain protein	VK055_0421_.	NA	NA	Non-essential	Non-essential	NA	NA
VK055_0423		Non-essential	-	428936	429767	831	disrupted	ABC transporter family protein	VK055_0423_.	NA	NA	NA	NA	NA	NA
VK055_0424		Non-essential	-	429764	430747	983	disrupted	ABC transporter substrate-binding protein	VK055_0424_.	NA	NA	NA	NA	NA	NA
VK055_0427		Non-essential	-	432093	433377	1284	disrupted	amidohydrolase family protein	VK055_0427_.	NA	NA	Non-essential	NA	NA	NA
VK055_0428		Non-essential	-	433388	434357	969	disrupted	2Fe-2S iron-sulfur cluster binding domain protein	VK055_0428_.	NA	NA	NA	NA	Non-essential	NA
VK055_0431		Non-essential	+	435757	436747	990	disrupted	NMT1/THI5 like family protein	VK055_0431_.	NA	NA	NA	NA	NA	NA
VK055_0432		Non-essential	+	436758	438177	1419	disrupted	amidohydrolase family protein	VK055_0432_.	NA	NA	NA	NA	Non-essential	NA
VK055_0433		Non-essential	+	438197	439187	990	disrupted	2OG-Fe(II) oxygenase superfamily protein	VK055_0433_.	NA	NA	NA	NA	Non-essential	NA
VK055_0434		Non-essential	-	439347	439857	510	disrupted	survival SurE family protein	VK055_0434_.	NA	Non-essential	Non-essential	Non-essential	Non-essential	NA
VK055_0435		Non-essential	+	440641	442150	1509	disrupted	EAL domain protein	VK055_0435_.	NA	NA	NA	NA	NA	NA
VK055_0436		Non-essential	-	442375	443143	768	disrupted	mltA-interacting MipA family protein	VK055_0436_.	NA	NA	NA	NA	NA	NA
VK055_0437		Non-essential	+	443282	443981	699	disrupted	transcriptional regulatory , C terminal family protein	VK055_0437_.	NA	NA	NA	NA	NA	NA
VK055_0438		Non-essential	+	443977	445150	1173	disrupted	HAMP domain protein	VK055_0438_.	NA	NA	NA	NA	NA	NA
VK055_0439		Non-essential	+	445248	446418	1170	disrupted	efflux transporter, RND family, MFP subunit	VK055_0439_.	NA	NA	NA	NA	NA	NA
VK055_0440		Non-essential	+	446401	449488	3087	disrupted	acrB/AcrD/AcrF family protein	VK055_0440_.	NA	NA	NA	NA	NA	NA
VK055_0441		Non-essential	+	450319	450619	300	disrupted	transposase family protein	VK055_0441_.	NA	NA	NA	NA	NA	NA
VK055_0442		Non-essential	+	450615	451482	867	disrupted	integrase core domain protein	VK055_0442_.	NA	NA	NA	NA	NA	NA
VK055_0443		Non-essential	-	451581	452817	1236	disrupted	alpha-ketoglutarate permease	VK055_0443_csbX	NA	Non-essential	Non-essential	NA	Non-essential	Non-essential
VK055_0444		Non-essential	-	452880	453834	954	disrupted	xylose isomerase-like TIM barrel family protein	VK055_0444_.	NA	NA	Non-essential	NA	NA	NA
VK055_0446		Non-essential	+	455043	455970	927	disrupted	pfkB carbohydrate kinase family protein	VK055_0446_.	NA	Non-essential	Non-essential	Non-essential	NA	NA
VK055_0447		Non-essential	-	456383	457307	924	disrupted	bacterial regulatory helix-turn-helix , lysR family protein	VK055_0447_.	NA	NA	NA	NA	NA	NA
VK055_0448		Non-essential	+	457423	458956	1533	disrupted	major Facilitator Superfamily protein	VK055_0448_.	NA	NA	NA	NA	NA	NA
VK055_0450		Non-essential	-	459421	459910	489	disrupted	dinB family protein	VK055_0450_.	NA	NA	NA	NA	NA	NA
VK055_0451		Non-essential	-	460027	460555	528	disrupted	putative inner membrane protein	VK055_0451_.	NA	NA	NA	NA	NA	NA
VK055_0452		Non-essential	-	460920	461892	972	disrupted	oligopeptide/dipeptide ABC transporter, ATP-binding , C-terminal domain protein	VK055_0452_.	NA	NA	Non-essential	Non-essential	Non-essential	NA
VK055_0454		Non-essential	-	462865	463813	948	disrupted	binding-protein-dependent transport system innermembrane component family protein	VK055_0454_.	NA	NA	Non-essential	Non-essential	Non-essential	NA
VK055_0455		Non-essential	-	463812	464772	960	disrupted	binding-protein-dependent transport system innermembrane component family protein	VK055_0455_.	NA	NA	Non-essential	NA	NA	NA
VK055_0456		Non-essential	-	464815	466519	1704	disrupted	bacterial extracellular solute-binding, 5 Middlefamily protein	VK055_0456_.	NA	NA	NA	NA	NA	NA
VK055_0457		Non-essential	-	466863	467547	684	disrupted	chloramphenicol acetyltransferase family protein	VK055_0457_.	NA	NA	NA	NA	NA	NA
VK055_0458		Non-essential	-	467578	467962	384	disrupted	glyoxalase family protein	VK055_0458_.	NA	NA	NA	NA	NA	NA
VK055_0459		Non-essential	+	468053	468824	771	disrupted	deoR C terminal sensor domain protein	VK055_0459_.	NA	NA	NA	NA	NA	NA
VK055_0460		Non-essential	-	468828	469458	630	disrupted	lysE type translocator family protein	VK055_0460_.	NA	NA	Non-essential	Non-essential	NA	NA
VK055_0462		Non-essential	-	470655	470865	210	disrupted	hypothetical protein	VK055_0462_.	NA	NA	NA	NA	NA	NA
VK055_0463		Non-essential	-	470949	471666	717	disrupted	hypothetical protein	VK055_0463_.	NA	NA	NA	NA	NA	NA
VK055_0466		Non-essential	-	473628	474144	516	disrupted	putative aBC-type sugar transport system protein	VK055_0466_.	NA	NA	NA	NA	NA	NA
VK055_0474		Non-essential	+	479146	479725	579	disrupted	putative lysine decarboxylase family protein	VK055_0474_.	NA	NA	NA	NA	NA	NA
VK055_0475		Non-essential	-	479864	480272	408	disrupted	acid shock repeat family protein	VK055_0475_.	NA	NA	NA	NA	NA	NA
VK055_0476		Non-essential	-	480447	481821	1374	disrupted	MATE efflux family protein	VK055_0476_.	NA	NA	NA	NA	Non-essential	NA
VK055_0478		Non-essential	-	482721	483870	1149	disrupted	cfa	VK055_0478_cfa	Non-essential	Non-essential	NA	NA	Non-essential	NA
VK055_0479		Non-essential	-	484162	485272	1110	disrupted	drug resistance transporter, Bcr/CflA subfamily protein	VK055_0479_.	NA	NA	Non-essential	NA	Non-essential	NA
VK055_0480		Non-essential	-	486387	487362	975	disrupted	periplasmic binding and sugar binding domain of LacI family protein	VK055_0480_.	NA	NA	NA	NA	NA	NA
VK055_0481		Non-essential	+	487965	489132	1167	disrupted	major Facilitator Superfamily protein	VK055_0481_.	NA	NA	Non-essential	Non-essential	NA	NA
VK055_0482		Non-essential	-	489194	489776	582	disrupted	sodB	VK055_0482_sodB	Non-essential	Non-essential	Non-essential	Non-essential	NA	NA
VK055_0483		Non-essential	-	490684	491557	873	disrupted	hypothetical protein	VK055_0483_.	NA	NA	Non-essential	Non-essential	NA	NA
VK055_0485		Non-essential	+	491897	492245	348	disrupted	monothiol glutaredoxin, Grx4 family	VK055_0485_grxD	Non-essential	Non-essential	Non-essential	Non-essential	NA	NA
VK055_0488		Non-essential	-	493563	494661	1098	disrupted	pentaerythritol tetranitrate reductase	VK055_0488_onr	NA	NA	Non-essential	NA	Non-essential	NA
VK055_0489		Non-essential	-	494714	495251	537	disrupted	nemR DNA binding transcriptional repressor	VK055_0489_ydhM	NA	NA	NA	NA	NA	NA
VK055_0490		Non-essential	+	495456	495696	240	disrupted	hypothetical protein	VK055_0490_.	NA	NA	NA	NA	NA	NA
VK055_0492		Non-essential	-	497224	499249	2025	disrupted	fusaric acid resistance family protein	VK055_0492_.	NA	NA	NA	NA	Non-essential	NA
VK055_0494		Non-essential	-	499248	500145	897	disrupted	efflux transporter, RND family, MFP subunit	VK055_0494_.	NA	NA	NA	NA	NA	NA
VK055_0495		Non-essential	-	500155	500365	210	disrupted	hypothetical protein	VK055_0495_.	NA	NA	NA	NA	NA	NA
VK055_0496		Non-essential	+	500570	501005	435	disrupted	transcriptional regulator slyA	VK055_0496_slyA	NA	NA	NA	NA	NA	NA
VK055_0497		Non-essential	-	501038	502400	1362	disrupted	diguanylate cyclase domain protein	VK055_0497_.	NA	NA	Non-essential	NA	NA	NA
VK055_0500		Non-essential	+	504574	504898	324	disrupted	inhibitor of c-type lysozyme, predicted lipoprotein	VK055_0500_ydhA	NA	NA	NA	NA	NA	NA
VK055_0503		Non-essential	+	507072	507933	861	disrupted	pyridoxal kinase	VK055_0503_.	Non-essential	Non-essential	Non-essential	Non-essential	Non-essential	NA
VK055_0504		Non-essential	-	507975	508581	606	disrupted	glutathione S-transferase	VK055_0504_bphK	NA	NA	NA	NA	Non-essential	NA
VK055_0505		Non-essential	-	508691	510164	1473	disrupted	tppB peptide POT Transporter	VK055_0505_tppB	NA	NA	Non-essential	NA	NA	NA
VK055_0506		Non-essential	+	510140	510356	216	disrupted	hypothetical protein	VK055_0506_.	NA	NA	NA	NA	NA	NA
VK055_0507		Non-essential	+	510386	510644	258	disrupted	hypothetical protein	VK055_0507_.	NA	NA	NA	NA	NA	NA
VK055_0508		Non-essential	-	510803	511439	636	disrupted	endonuclease III	VK055_0508_nth	NA	NA	NA	NA	NA	NA
VK055_0509		Non-essential	-	511440	512139	699	disrupted	electron transport complex, RnfABCDGE type, E subunit	VK055_0509_.	NA	NA	NA	NA	NA	NA
VK055_0510		Non-essential	-	512141	512762	621	disrupted	electron transport complex, RnfABCDGE type, G subunit	VK055_0510_.	NA	NA	NA	NA	NA	NA
VK055_0511		Non-essential	-	512772	513825	1053	disrupted	electron transport complex, RnfABCDGE type, D subunit	VK055_0511_.	NA	NA	NA	NA	Non-essential	NA
VK055_0512		Non-essential	-	513825	515985	2160	disrupted	electron transport complex, RnfABCDGE type, C subunit	VK055_0512_.	NA	NA	NA	NA	Non-essential	NA
VK055_0515		Non-essential	-	517215	517656	441	disrupted	hypothetical protein	VK055_0515_.	NA	NA	NA	NA	NA	NA
VK055_0516		Non-essential	-	517731	518001	270	disrupted	hemolysin expression modulating family protein	VK055_0516_.	NA	NA	NA	NA	NA	NA
VK055_0517		Non-essential	-	518163	519534	1371	disrupted	beta-galactosidase	VK055_0517_.	NA	NA	Non-essential	NA	Non-essential	NA
VK055_0518		Non-essential	+	519977	521018	1041	disrupted	putative oxidoreductase	VK055_0518_.	NA	NA	NA	NA	NA	NA
VK055_0519		Non-essential	-	521053	522055	1002	disrupted	adenosine deaminase	VK055_0519_add	Non-essential	Non-essential	Non-essential	Non-essential	Non-essential	NA
VK055_0521		Non-essential	+	523641	524025	384	disrupted	hypothetical protein	VK055_0521_.	NA	NA	NA	NA	NA	NA
VK055_0522		Non-essential	+	524268	524454	186	disrupted	hypothetical protein	VK055_0522_.	NA	NA	NA	NA	NA	NA
VK055_0523		Non-essential	-	524463	524826	363	disrupted	putative rND multidrug efflux transporter MexD	VK055_0523_.	NA	NA	NA	NA	NA	NA
VK055_0524		Non-essential	+	525085	525613	528	disrupted	prokaryotic cytochrome b561 family protein	VK055_0524_.	NA	NA	NA	NA	NA	NA
VK055_0526		Non-essential	+	526017	527136	1119	disrupted	S-(hydroxymethyl)glutathione dehydrogenase/classIII alcohol dehydrogenase	VK055_0526_.	Non-essential	Non-essential	Non-essential	Non-essential	Non-essential	NA
VK055_0527		Non-essential	-	527205	529578	2373	disrupted	quinate/shikimate dehydrogenase (Pyrroloquinoline-quinone)	VK055_0527_quiA	NA	NA	Non-essential	NA	Non-essential	NA
VK055_0528		Non-essential	-	529878	530802	924	disrupted	bacterial regulatory helix-turn-helix , lysR family protein	VK055_0528_.	NA	NA	NA	NA	NA	NA
VK055_0529		Non-essential	-	530979	531600	621	disrupted	protocatechuate 3,4-dioxygenase, alpha subunit	VK055_0529_pcaG	NA	NA	Non-essential	NA	Non-essential	NA
VK055_0530		Non-essential	-	531596	532337	741	disrupted	protocatechuate 3,4-dioxygenase, beta subunit	VK055_0530_pcaH	NA	NA	Non-essential	NA	Non-essential	NA
VK055_0531		Non-essential	+	532576	533920	1344	disrupted	hypothetical protein	VK055_0531_.	NA	NA	NA	NA	NA	NA
VK055_0532		Non-essential	+	533961	535467	1506	disrupted	alpha/beta hydrolase fold family protein	VK055_0532_.	NA	NA	NA	NA	NA	NA
VK055_0533		Non-essential	-	535513	536596	1083	disrupted	benzyl alcohol dehydrogenase	VK055_0533_xylB	NA	NA	Non-essential	Non-essential	Non-essential	NA
VK055_0534		Non-essential	+	537039	538695	1656	disrupted	glucan biosynthesis protein D	VK055_0534_.	NA	NA	NA	NA	NA	NA
VK055_0535		Non-essential	-	539312	540293	981	disrupted	putative transferase	VK055_0535_.	NA	NA	NA	NA	NA	NA
VK055_0536		Non-essential	+	538748	539327	579	disrupted	ribosomal-protein-L12-serine acetyltransferase	VK055_0536_rimL	NA	NA	NA	NA	NA	NA
VK055_0537		Non-essential	+	540404	541409	1005	disrupted	C4-dicarboxylate transporter/malic acid transport family protein	VK055_0537_tdt	NA	NA	NA	NA	NA	NA
VK055_0538		Non-essential	+	541411	542002	591	disrupted	tellurite resistance protein TehB	VK055_0538_tehB2	NA	NA	NA	NA	NA	NA
VK055_0540		Non-essential	+	542262	542931	669	disrupted	hypothetical protein	VK055_0540_.	NA	NA	NA	NA	NA	NA
VK055_0542		Non-essential	-	544900	546067	1167	disrupted	benzoate transporter family protein	VK055_0542_.	NA	NA	NA	NA	NA	NA
VK055_0543		Non-essential	+	544054	544924	870	disrupted	bacterial regulatory helix-turn-helix, AraC family protein	VK055_0543_.	NA	NA	NA	NA	NA	NA
VK055_0546		Non-essential	+	547033	548995	1962	disrupted	putative peptidase	VK055_0546_.	NA	NA	NA	NA	NA	NA
VK055_0548		Non-essential	-	549386	549689	303	disrupted	hypothetical protein	VK055_0548_.	NA	NA	NA	NA	NA	NA
VK055_0550		Non-essential	-	549909	550920	1011	disrupted	cytochrome d ubiquinol oxidase, subunit II	VK055_0550_cydB2	NA	NA	NA	NA	Non-essential	NA
VK055_0551		Non-essential	-	550919	552317	1398	disrupted	bacterial Cytochrome Ubiquinol Oxidase family protein	VK055_0551_.	NA	NA	Non-essential	Non-essential	Non-essential	NA
VK055_0552		Non-essential	+	553004	554417	1413	disrupted	fused predicted DNA-binding transcriptional regulator and predicted amino transferase	VK055_0552_.	NA	NA	NA	NA	NA	NA
VK055_0553		Non-essential	+	554721	555867	1146	disrupted	bacterial extracellular solute-binding family protein	VK055_0553_.	Non-essential	Non-essential	Non-essential	Non-essential	Non-essential	NA
VK055_0554		Non-essential	+	555883	556897	1014	disrupted	ABC transporter family protein	VK055_0554_.	Non-essential	Non-essential	Non-essential	Non-essential	Non-essential	NA
VK055_0555		Non-essential	+	556898	557828	930	disrupted	binding-protein-dependent transport system innermembrane component family protein	VK055_0555_.	Non-essential	Non-essential	Non-essential	Non-essential	NA	NA
VK055_0556		Non-essential	+	557817	558624	807	disrupted	binding-protein-dependent transport system innermembrane component family protein	VK055_0556_.	Non-essential	Non-essential	Non-essential	Non-essential	Non-essential	NA
VK055_0557		Non-essential	+	558646	560074	1428	disrupted	1-pyrroline dehydrogenase	VK055_0557_ydcW	Non-essential	Non-essential	Non-essential	Non-essential	Non-essential	NA
VK055_0558		Non-essential	-	560415	560538	123	disrupted	hypothetical protein	VK055_0558_.	NA	NA	NA	NA	NA	NA
VK055_0561		Non-essential	+	561873	562623	750	disrupted	alpha/beta hydrolase fold family protein	VK055_0561_.	NA	NA	Non-essential	NA	NA	NA
VK055_0563		Non-essential	+	564339	565938	1599	disrupted	dppA	VK055_0563_.	NA	NA	Non-essential	Non-essential	NA	NA
VK055_0564		Non-essential	+	565954	566188	234	disrupted	hypothetical protein	VK055_0564_.	NA	NA	NA	NA	NA	NA
VK055_0566		Non-essential	-	566642	567161	519	disrupted	putative acyltransferase	VK055_0566_.	NA	NA	NA	NA	NA	Non-essential
VK055_0567		Non-essential	+	567323	567905	582	disrupted	helix-turn-helix family protein	VK055_0567_.	NA	NA	NA	NA	NA	NA
VK055_0570		Non-essential	+	569969	570199	230	disrupted	hypothetical protein	VK055_0570_.	NA	NA	NA	NA	NA	NA
VK055_0572		Non-essential	-	570685	572392	1707	disrupted	amidohydrolase family protein	VK055_0572_.	NA	NA	NA	NA	NA	NA
VK055_0573		Non-essential	-	572578	574684	2106	disrupted	tonB dependent receptor family protein	VK055_0573_.	NA	NA	Non-essential	NA	NA	NA
VK055_0574		Non-essential	+	574942	576004	1062	disrupted	hypothetical protein	VK055_0574_.	NA	NA	NA	NA	NA	NA
VK055_0576		Non-essential	-	576444	577899	1455	disrupted	amino acid permease family protein	VK055_0576_.	Non-essential	Non-essential	Non-essential	Non-essential	Non-essential	NA
VK055_0578		Non-essential	+	579249	579801	552	disrupted	shikimate kinase family protein	VK055_0578_.	NA	NA	Non-essential	Non-essential	NA	NA
VK055_0581		Non-essential	+	582092	583349	1257	disrupted	putative monooxygenase moxC	VK055_0581_.	NA	NA	NA	NA	NA	NA
VK055_0582		Non-essential	+	583366	584299	933	disrupted	bacterial extracellular solute-binding, 3 familyprotein	VK055_0582_.	NA	NA	NA	NA	NA	NA
VK055_0583		Non-essential	+	584310	584820	510	disrupted	acetyltransferase family protein	VK055_0583_.	NA	NA	NA	NA	NA	NA
VK055_0584		Non-essential	+	584829	585756	927	disrupted	amino ABC transporter, permease , 3-TM region, His/Glu/Gln/Arg/opine family domain protein	VK055_0584_.	NA	NA	NA	NA	NA	NA
VK055_0585		Non-essential	+	585739	586519	780	disrupted	ABC transporter family protein	VK055_0585_.	NA	NA	Non-essential	Non-essential	Non-essential	NA
VK055_0586		Non-essential	+	586530	587409	879	disrupted	bacterial extracellular solute-binding, 3 familyprotein	VK055_0586_.	NA	NA	NA	NA	NA	NA
VK055_0587		Non-essential	+	587486	588104	618	disrupted	glutathione S-transferase, N-terminal domain protein	VK055_0587_.	NA	NA	NA	NA	NA	NA
VK055_0588		Non-essential	+	588174	588402	228	disrupted	tautomerase pptA	VK055_0588_pptA	NA	NA	NA	NA	NA	NA
VK055_0591		Non-essential	-	589443	591060	1617	disrupted	sucrose porin	VK055_0591_scrY	NA	NA	NA	NA	NA	NA
VK055_0592		Non-essential	-	591103	592486	1383	disrupted	sugar (Glycoside-Pentoside-Hexuronide) transporter domain protein	VK055_0592_gph	NA	NA	Non-essential	NA	Non-essential	NA
VK055_0593		Non-essential	-	592509	594078	1569	disrupted	bacterial alpha-L-rhamnosidase family protein	VK055_0593_.	NA	NA	NA	NA	NA	NA
VK055_0594		Non-essential	+	594282	595107	825	disrupted	cupin domain protein	VK055_0594_.	NA	NA	NA	NA	NA	NA
VK055_0595		Non-essential	-	595161	595743	582	disrupted	flavin reductase domain protein, FMN-binding protein	VK055_0595_.	NA	NA	NA	NA	NA	NA
VK055_0596		Non-essential	+	595954	596659	705	disrupted	ABC transporter family protein	VK055_0596_.	NA	NA	Non-essential	NA	Non-essential	NA
VK055_0597		Non-essential	+	596655	597624	969	disrupted	bacterial extracellular solute-binding family protein	VK055_0597_.	NA	NA	NA	NA	Non-essential	NA
VK055_0598		Non-essential	+	597681	599337	1656	disrupted	binding-protein-dependent transport system innermembrane component family protein	VK055_0598_.	NA	NA	Non-essential	Non-essential	NA	NA
VK055_0599		Non-essential	+	599413	600259	846	disrupted	arylamine N-acetyltransferase	VK055_0599_.	Non-essential	Non-essential	NA	NA	NA	NA
VK055_0600		Non-essential	-	600810	601491	681	disrupted	respiratory nitrate reductase, gamma subunit	VK055_0600_narI2	Non-essential	Non-essential	Non-essential	NA	Non-essential	NA
VK055_0602		Non-essential	-	602182	603727	1545	disrupted	nitrate reductase, beta subunit	VK055_0602_narH2	Non-essential	Non-essential	Non-essential	NA	Non-essential	NA
VK055_0603		Non-essential	-	603723	607464	3741	disrupted	nitrate reductase, alpha subunit	VK055_0603_.	Non-essential	Non-essential	Non-essential	NA	Non-essential	NA
VK055_0604		Non-essential	-	607578	608961	1383	disrupted	narK MFS nitrate/nitrite antiporter	VK055_0604_narK2	NA	NA	Non-essential	NA	Non-essential	NA
VK055_0605		Non-essential	-	609135	609711	576	disrupted	bacterial regulatory, tetR family protein	VK055_0605_.	NA	NA	NA	NA	NA	NA
VK055_0606		Non-essential	-	611328	612126	798	disrupted	bacterial transcriptional regulator family protein	VK055_0606_.	NA	NA	NA	NA	NA	NA
VK055_0607		Non-essential	+	609849	611334	1485	disrupted	major Facilitator Superfamily protein	VK055_0607_.	NA	NA	NA	NA	Non-essential	NA
VK055_0608		Non-essential	+	612379	613498	1119	disrupted	muconate cycloisomerase	VK055_0608_catB	Non-essential	Non-essential	Non-essential	NA	Non-essential	NA
VK055_0610		Non-essential	+	613874	614801	927	disrupted	catechol 1,2-dioxygenase	VK055_0610_catA	Non-essential	Non-essential	Non-essential	NA	Non-essential	NA
VK055_0611		Non-essential	+	614911	616293	1382	disrupted	Rieske 2Fe-2S domain-containing protein	VK055_0611_cbdA	Non-essential	Non-essential	Non-essential	NA	Non-essential	NA
VK055_0612		Non-essential	+	616292	616778	486	disrupted	benzoate 1,2-dioxygenase, small subunit	VK055_0612_benB	Non-essential	Non-essential	Non-essential	NA	Non-essential	NA
VK055_0613		Non-essential	+	616787	617804	1017	disrupted	benzoate 1,2-dioxygenase electron transfer component	VK055_0613_benC	Non-essential	Non-essential	Non-essential	NA	Non-essential	NA
VK055_0614		Non-essential	-	618583	619462	879	disrupted	aromatic amino acid exporter	VK055_0614_.	NA	NA	Non-essential	Non-essential	Non-essential	NA
VK055_0615		Non-essential	+	617813	618587	774	disrupted	short chain dehydrogenase family protein	VK055_0615_.	Non-essential	Non-essential	Non-essential	NA	Non-essential	NA
VK055_0617		Non-essential	+	619688	622735	3047	disrupted	formate dehydrogenase-N subunit alpha	VK055_0617_.	Non-essential	Non-essential	Non-essential	Non-essential	NA	NA
VK055_0619		Non-essential	+	623623	624280	657	disrupted	formate dehydrogenase, gamma subunit	VK055_0619_.	Non-essential	Non-essential	Non-essential	Non-essential	NA	NA
VK055_0622		Non-essential	-	625019	625838	819	disrupted	polyphosphate kinase 2	VK055_0622_ppk2	NA	NA	Non-essential	Non-essential	NA	NA
VK055_0624		Non-essential	+	626610	627765	1155	disrupted	sugar (and other) transporter family protein	VK055_0624_.	NA	NA	Non-essential	NA	Non-essential	NA
VK055_0625		Non-essential	-	627771	628863	1092	disrupted	hypothetical protein	VK055_0625_.	NA	NA	NA	NA	NA	NA
VK055_0626		Non-essential	-	628872	629859	987	disrupted	luciferase-like monooxygenase family protein	VK055_0626_.	NA	NA	NA	NA	Non-essential	NA
VK055_0627		Non-essential	-	629858	631475	1617	disrupted	nickel import ATP-binding protein NikE	VK055_0627_nikE	NA	NA	Non-essential	Non-essential	Non-essential	NA
VK055_0628		Non-essential	-	631471	632320	849	disrupted	binding-protein-dependent transport system innermembrane component family protein	VK055_0628_.	NA	NA	NA	NA	Non-essential	NA
VK055_0629		Non-essential	-	632316	633261	945	disrupted	binding-protein-dependent transport system innermembrane component family protein	VK055_0629_.	NA	NA	Non-essential	Non-essential	NA	NA
VK055_0630		Non-essential	-	633271	634894	1623	disrupted	bacterial extracellular solute-binding, 5 Middlefamily protein	VK055_0630_.	NA	NA	Non-essential	Non-essential	Non-essential	NA
VK055_0631		Non-essential	-	635063	636074	1011	disrupted	zinc-binding dehydrogenase family protein	VK055_0631_.	Non-essential	Non-essential	Non-essential	Non-essential	Non-essential	NA
VK055_0632		Non-essential	+	636326	636926	600	disrupted	ppa	VK055_0632_ppa	NA	NA	Non-essential	Non-essential	NA	NA
VK055_0634		Non-essential	-	638104	639787	1683	disrupted	ABC transporter family protein	VK055_0634_.	NA	NA	NA	NA	NA	NA
VK055_0635		Non-essential	-	640217	640925	708	disrupted	putative glycosyltransferase	VK055_0635_.	NA	NA	NA	NA	NA	NA
VK055_0636		Non-essential	-	641108	642806	1698	disrupted	malate dehydrogenase, NAD-requiring	VK055_0636_.	Non-essential	Non-essential	Non-essential	Non-essential	Non-essential	NA
VK055_0639		Non-essential	-	643305	644157	852	disrupted	metallo-beta-lactamase superfamily protein	VK055_0639_.	NA	NA	NA	NA	NA	NA
VK055_0640		Non-essential	+	644270	645164	894	disrupted	bacterial regulatory helix-turn-helix , lysR family protein	VK055_0640_.	NA	NA	NA	NA	NA	NA
VK055_0642		Non-essential	-	645673	646594	921	disrupted	short chain dehydrogenase family protein	VK055_0642_.	NA	NA	Non-essential	Non-essential	NA	NA
VK055_0645		Non-essential	+	648034	648541	507	disrupted	protein yciE	VK055_0645_yciE	NA	NA	NA	NA	NA	NA
VK055_0648		Non-essential	+	648779	650405	1626	disrupted	alpha amylase, catalytic domain protein	VK055_0648_.	NA	NA	Non-essential	NA	Non-essential	NA
VK055_0651		Non-essential	+	652818	653223	405	disrupted	putative periplasmic protein	VK055_0651_.	NA	NA	NA	NA	NA	NA
VK055_0653		Non-essential	+	653508	653940	432	disrupted	peroxiredoxin, OsmC subfamily protein	VK055_0653_.	NA	NA	NA	NA	NA	NA
VK055_0655		Non-essential	-	654915	655602	687	disrupted	bacterial extracellular solute-binding, 3 familyprotein	VK055_0655_.	NA	NA	NA	NA	NA	NA
VK055_0656		Non-essential	+	655823	656747	924	disrupted	cation diffusion facilitator transporter family protein	VK055_0656_.	NA	NA	Non-essential	NA	Non-essential	NA
VK055_0657		Non-essential	+	656989	657907	918	disrupted	bestrophin, RFP-TM, chloride channel family protein	VK055_0657_.	NA	NA	NA	NA	NA	NA
VK055_0658		Non-essential	+	658222	660523	2301	disrupted	acid resistance protein	VK055_0658_.	NA	NA	Non-essential	NA	Non-essential	NA
VK055_0660		Non-essential	+	661957	663193	1236	disrupted	PTS system, lactose/cellobiose IIC component family protein	VK055_0660_.	NA	Non-essential	NA	NA	NA	NA
VK055_0661		Non-essential	+	663243	665856	2613	disrupted	bacterial alpha-L-rhamnosidase family protein	VK055_0661_.	NA	NA	NA	NA	NA	NA
VK055_0663		Non-essential	+	667029	668313	1284	disrupted	lamB porin family protein	VK055_0663_.	NA	NA	NA	NA	NA	NA
VK055_0664		Non-essential	+	668366	669311	945	disrupted	alpha/beta hydrolase fold family protein	VK055_0664_.	NA	NA	NA	NA	NA	NA
VK055_0665		Non-essential	+	669336	669660	324	disrupted	PTS system, Lactose/Cellobiose specific IIB subunit	VK055_0665_.	NA	Non-essential	Non-essential	NA	NA	Non-essential
VK055_0666		Non-essential	+	669669	669984	315	disrupted	PTS system, Lactose/Cellobiose specific IIA subunit	VK055_0666_.	NA	NA	NA	NA	NA	NA
VK055_0667		Non-essential	-	670024	671431	1407	disrupted	sugar (and other) transporter family protein	VK055_0667_.	NA	NA	Non-essential	NA	NA	NA
VK055_0670		Non-essential	+	672869	673856	987	disrupted	AFG1-like ATPase family protein	VK055_0670_.	NA	NA	NA	NA	NA	NA
VK055_0671		Non-essential	-	673890	676068	2178	disrupted	catalase/peroxidase HPI	VK055_0671_katG	Non-essential	Non-essential	Non-essential	Non-essential	NA	NA
VK055_0672		Non-essential	+	676508	677141	633	disrupted	lysE type translocator family protein	VK055_0672_.	NA	NA	Non-essential	Non-essential	Non-essential	NA
VK055_0673		Non-essential	+	677362	679273	1911	disrupted	penicillin-binding protein 2	VK055_0673_mrdA	NA	NA	Non-essential	Non-essential	Non-essential	NA
VK055_0674		Non-essential	-	680119	682405	2286	disrupted	coenzyme PQQ biosynthesis protein PqqF	VK055_0674_pqqF	NA	NA	NA	NA	NA	NA
VK055_0676		Non-essential	-	682404	683547	1143	disrupted	coenzyme PQQ biosynthesis enzyme PqqE	VK055_0676_pqqE	NA	NA	NA	NA	NA	NA
VK055_0678		Non-essential	-	683814	684570	756	disrupted	coenzyme PQQ biosynthesis protein C	VK055_0678_pqqC	NA	NA	NA	NA	Non-essential	NA
VK055_0682		Non-essential	+	688094	688835	741	disrupted	response regulator	VK055_0682_.	NA	NA	Non-essential	NA	NA	NA
VK055_0683		Non-essential	+	688831	690175	1344	disrupted	HAMP domain protein	VK055_0683_.	NA	NA	NA	NA	NA	NA
VK055_0686		Non-essential	-	692731	694204	1473	disrupted	L-2,4-diaminobutyrate decarboxylase	VK055_0686_ddc	NA	NA	Non-essential	NA	Non-essential	NA
VK055_0687		Non-essential	-	694222	695608	1386	disrupted	diaminobutyrate--2-oxoglutarate aminotransferase	VK055_0687_dat	NA	NA	Non-essential	NA	Non-essential	NA
VK055_0688		Non-essential	-	695914	696850	936	disrupted	putative thiamine biosynthesis protein	VK055_0688_.	NA	NA	Non-essential	NA	Non-essential	NA
VK055_0692		Non-essential	+	699418	700525	1107	disrupted	hypothetical protein	VK055_0692_.	NA	NA	NA	NA	NA	NA
VK055_0693		Non-essential	-	700562	701735	1173	disrupted	oxidoreductase, Gfo/Idh/MocA family	VK055_0693_.	NA	NA	NA	NA	NA	NA
VK055_0694		Non-essential	-	701748	702672	924	disrupted	xylose isomerase-like TIM barrel family protein	VK055_0694_.	NA	NA	Non-essential	NA	NA	NA
VK055_0695		Non-essential	-	702864	703905	1041	disrupted	bacterial regulatory, lacI family protein	VK055_0695_.	NA	NA	NA	NA	NA	NA
VK055_0696		Non-essential	+	704302	705559	1257	disrupted	diguanylate cyclase domain protein	VK055_0696_.	NA	NA	Non-essential	NA	NA	NA
VK055_0697		Non-essential	-	705656	706964	1308	disrupted	guanine deaminase	VK055_0697_guaD	Non-essential	Non-essential	Non-essential	Non-essential	Non-essential	NA
VK055_0698		Non-essential	-	707068	708565	1497	disrupted	permease for cytosine/purines, uracil, thiamine,allantoin family protein	VK055_0698_.	NA	NA	Non-essential	NA	Non-essential	NA
VK055_0703		Non-essential	-	711202	711994	792	disrupted	sulfite exporter TauE/SafE family protein	VK055_0703_.	NA	NA	NA	NA	NA	NA
VK055_0704		Non-essential	+	712103	712871	768	disrupted	bacterial regulatory helix-turn-helix, AraC family protein	VK055_0704_.	NA	NA	NA	NA	NA	NA
VK055_0705		Non-essential	+	713073	713298	225	disrupted	hypothetical protein	VK055_0705_.	NA	NA	NA	NA	NA	NA
VK055_0706		Non-essential	-	713460	714114	654	disrupted	alpha/beta hydrolase fold family protein	VK055_0706_.	NA	Non-essential	NA	NA	NA	NA
VK055_0707		Non-essential	-	714487	715213	726	disrupted	glutamine amidotransferase class-I family protein	VK055_0707_.	NA	NA	Non-essential	Non-essential	Essential	NA
VK055_0708		Non-essential	+	715791	716106	315	disrupted	bacterial regulatory helix-turn-helix, AraC family protein	VK055_0708_.	NA	NA	NA	NA	NA	NA
VK055_0710		Non-essential	+	718025	718169	144	disrupted	hypothetical protein	VK055_0710_.	NA	NA	NA	NA	NA	NA
VK055_0712		Non-essential	-	718373	719648	1275	disrupted	beta-ketoacyl-acyl-carrier-protein synthase II	VK055_0712_fabF2	NA	NA	NA	Non-essential	Non-essential	NA
VK055_0713		Non-essential	-	719667	721230	1563	disrupted	H+ antiporter-2 family protein	VK055_0713_.	NA	NA	NA	NA	NA	NA
VK055_0715		Non-essential	-	722253	722811	558	disrupted	hxlR-like helix-turn-helix family protein	VK055_0715_.	NA	NA	NA	NA	NA	NA
VK055_0716		Non-essential	+	723191	724250	1059	disrupted	aspartate-semialdehyde dehydrogenase	VK055_0716_asd	NA	NA	Non-essential	Non-essential	Non-essential	NA
VK055_0718		Non-essential	-	724795	725182	387	disrupted	hypothetical protein	VK055_0718_.	NA	NA	NA	NA	NA	NA
VK055_0719		Non-essential	-	725178	726576	1398	disrupted	amidohydrolase, AtzE family protein	VK055_0719_.	Non-essential	Non-essential	Non-essential	Non-essential	Non-essential	NA
VK055_0721		Non-essential	-	726768	728355	1587	disrupted	putative gamma-glutamyltransferase ywrD	VK055_0721_.	NA	NA	NA	NA	NA	NA
VK055_0722		Non-essential	+	728534	729374	840	disrupted	helix-turn-helix domain, rpiR family protein	VK055_0722_.	NA	NA	NA	NA	NA	NA
VK055_0724		Non-essential	+	730383	731049	666	disrupted	amino ABC transporter, permease , 3-TM region, His/Glu/Gln/Arg/opine family domain protein	VK055_0724_.	NA	NA	Non-essential	Non-essential	NA	NA
VK055_0725		Non-essential	+	731048	731705	657	disrupted	amino ABC transporter, permease , 3-TM region, His/Glu/Gln/Arg/opine family domain protein	VK055_0725_.	NA	NA	Non-essential	Non-essential	Non-essential	NA
VK055_0727		Non-essential	+	732438	733680	1242	disrupted	purine catabolism protein pucG	VK055_0727_pucG	Non-essential	Non-essential	Non-essential	Non-essential	Non-essential	NA
VK055_0729		Non-essential	-	734968	735946	978	disrupted	nitronate monooxygenase family protein	VK055_0729_.	NA	NA	Non-essential	Non-essential	NA	NA
VK055_0730		Non-essential	+	736114	737011	897	disrupted	bacterial regulatory helix-turn-helix , lysR family protein	VK055_0730_.	NA	NA	NA	NA	NA	NA
VK055_0731		Non-essential	+	737075	737609	534	disrupted	putative e3 ubiquitin-protein ligase TRIM33	VK055_0731_.	NA	NA	NA	NA	NA	NA
VK055_0734		Non-essential	-	739290	740391	1101	disrupted	dihydrouridine synthase family protein	VK055_0734_.	NA	NA	Non-essential	NA	Non-essential	NA
VK055_0735		Non-essential	-	740498	742106	1608	disrupted	hypothetical protein with FAD/NAD(P)-binding domain	VK055_0735_ydhS	NA	NA	NA	NA	NA	NA
VK055_0736		Non-essential	-	743610	744537	927	disrupted	eamA-like transporter family protein	VK055_0736_.	NA	NA	NA	NA	NA	NA
VK055_0737		Non-essential	+	742381	743614	1233	disrupted	sugar (and other) transporter family protein	VK055_0737_.	NA	NA	Non-essential	NA	Non-essential	NA
VK055_0739		Non-essential	+	744738	745839	1101	disrupted	putative aBC-type spermidine/putrescine transport systems	VK055_0739_.	NA	NA	NA	NA	NA	NA
VK055_0740		Non-essential	+	746734	747427	693	disrupted	hypothetical protein	VK055_0740_.	NA	NA	NA	NA	NA	NA
VK055_0741		Non-essential	+	747660	748140	480	disrupted	hypothetical protein	VK055_0741_.	NA	NA	NA	NA	NA	NA
VK055_0743		Non-essential	+	748331	748868	537	disrupted	acetyltransferase family protein	VK055_0743_.	NA	NA	NA	NA	NA	NA
VK055_0744		Non-essential	-	748905	750162	1257	disrupted	oxalate/formate antiporter	VK055_0744_oxlT	NA	NA	NA	NA	NA	Non-essential
VK055_0745		Non-essential	+	750396	750639	243	disrupted	hypothetical protein	VK055_0745_.	NA	NA	NA	NA	NA	NA
VK055_0746		Non-essential	-	750736	751795	1059	disrupted	periplasmic binding and sugar binding domain of LacI family protein	VK055_0746_.	NA	NA	NA	NA	NA	NA
VK055_0749		Non-essential	+	752752	754015	1263	disrupted	PTS system sugar-specific permease component family protein	VK055_0749_.	NA	NA	Non-essential	NA	Non-essential	NA
VK055_0750		Non-essential	+	754068	754716	648	disrupted	D-allulose-6-phosphate 3-epimerase	VK055_0750_alsE	NA	NA	Non-essential	NA	NA	NA
VK055_0753		Non-essential	+	755713	756820	1107	disrupted	PTS system, Fru family, IIC component domain protein	VK055_0753_.	NA	NA	Non-essential	NA	Non-essential	NA
VK055_0754		Non-essential	+	757025	757646	621	disrupted	lysE type translocator family protein	VK055_0754_.	NA	NA	Non-essential	Non-essential	NA	NA
VK055_0755		Non-essential	-	757703	758912	1209	disrupted	major Facilitator Superfamily protein	VK055_0755_.	NA	NA	NA	NA	NA	NA
VK055_0756		Non-essential	+	759015	759918	903	disrupted	bacterial regulatory helix-turn-helix , lysR family protein	VK055_0756_.	NA	NA	NA	NA	NA	NA
VK055_0757		Non-essential	-	759959	760865	906	disrupted	bacterial regulatory helix-turn-helix , lysR family protein	VK055_0757_.	NA	NA	NA	NA	NA	NA
VK055_0761		Non-essential	-	762477	763590	1113	disrupted	peptidase, ArgE/DapE family protein	VK055_0761_.	NA	NA	Non-essential	Non-essential	NA	NA
VK055_0762		Non-essential	-	763589	764345	756	disrupted	hypothetical protein	VK055_0762_.	NA	NA	NA	NA	NA	NA
VK055_0763		Non-essential	-	764359	765439	1080	disrupted	resiniferatoxin-binding, phosphotriesterase-related protein	VK055_0763_.	NA	NA	NA	NA	NA	NA
VK055_0764		Non-essential	-	765442	766423	981	disrupted	branched-chain amino acid transport system / permease component family protein	VK055_0764_.	NA	NA	Non-essential	NA	NA	NA
VK055_0765		Non-essential	-	766462	767209	747	disrupted	ABC transporter family protein	VK055_0765_.	NA	NA	Non-essential	NA	NA	NA
VK055_0767		Non-essential	+	768957	769911	954	disrupted	periplasmic binding and sugar binding domain of LacI family protein	VK055_0767_.	NA	NA	Non-essential	NA	NA	NA
VK055_0773		Non-essential	-	772957	774163	1206	disrupted	cystathionine beta-lyase	VK055_0773_metC	NA	Non-essential	Non-essential	Non-essential	Non-essential	NA
VK055_0775		Non-essential	-	775559	776840	1281	disrupted	putative transmembrane transport protein	VK055_0775_.	NA	Non-essential	NA	NA	NA	NA
VK055_0776		Non-essential	-	777205	778144	939	disrupted	bacterial regulatory helix-turn-helix , lysR family protein	VK055_0776_.	NA	NA	NA	NA	NA	NA
VK055_0777		Non-essential	-	778461	779466	1005	disrupted	cytochrome d ubiquinol oxidase, subunit II	VK055_0777_cydB3	NA	Non-essential	Non-essential	Non-essential	Non-essential	NA
VK055_0778		Non-essential	-	779458	780877	1419	disrupted	bacterial Cytochrome Ubiquinol Oxidase family protein	VK055_0778_.	NA	Non-essential	NA	NA	Non-essential	NA
[truncated: 3,158 more rows]
